# Supplementary material
Source: publisher figshare collection journal article supplement (https://rs.figshare.com/ndownloader/files/38071104)
Supplement: Supplementary file 1 [file 38071104]

#NEXUS

Begin taxa;
	Dimensions ntax=20;
		Taxlabels
			Echidiporites_barbeitoensis 
			Grimsdalea_magnaclavata 
			Grimsdalea_polygonalis 
			Lepidocaryum_tenue_0 
			Lepidocaryum_tenue_gracile_0 
			Mauritia_carana_0 
			Mauritia_flexuosa_0 
			Mauritiella_aculeata_0 
			Mauritiella_armata_0 
			Mauritiella_macroclada_0 
			Mauritiella_pumila_l_0 
			Mauritiella_pumila_s_0 
			Mauritiidites_crassibaculatus 
			Mauritiidites_crassiexinus 
			Mauritiidites_franciscoi_franciscoi 
			Mauritiidites_franciscoi_minutus 
			Mauritiidites_franciscoi_pachyexinatus 
			Mauritiidites_lehmanii 
			Oncocalamus_mannii_0 
			Raphia_palmapinus_0
			;
End;
Begin trees;
	Translate
		   1 Echidiporites_barbeitoensis,
		   2 Grimsdalea_magnaclavata,
		   3 Grimsdalea_polygonalis,
		   4 Lepidocaryum_tenue_0,
		   5 Lepidocaryum_tenue_gracile_0,
		   6 Mauritia_carana_0,
		   7 Mauritia_flexuosa_0,
		   8 Mauritiella_aculeata_0,
		   9 Mauritiella_armata_0,
		  10 Mauritiella_macroclada_0,
		  11 Mauritiella_pumila_l_0,
		  12 Mauritiella_pumila_s_0,
		  13 Mauritiidites_crassibaculatus,
		  14 Mauritiidites_crassiexinus,
		  15 Mauritiidites_franciscoi_franciscoi,
		  16 Mauritiidites_franciscoi_minutus,
		  17 Mauritiidites_franciscoi_pachyexinatus,
		  18 Mauritiidites_lehmanii,
		  19 Oncocalamus_mannii_0,
		  20 Raphia_palmapinus_0
;

tree STATE_0 = (((((((1[&rate=3.4149048729320997E-4]:10.0,15[&rate=2.76782470791798E-4]:0.0)[&rate=0.0061621938182364]:11.366974872187768,14[&rate=2.76782470791798E-4]:5.266974872187774)[&rate=1.569404449763382E-4]:23.866219596184123,2[&rate=1.569404449763382E-4]:35.23319446837189)[&rate=0.0031129605531154837]:4.322871146766261,(16[&rate=7.326015251976917E-4]:23.822822326779132,(17[&rate=3.758920336734106E-4]:20.299999999999997,18[&rate=0.001090501850755216]:0.0)[&rate=9.420904613396537E-5]:3.522822326779135)[&rate=9.279387174113437E-4]:15.73324328835902)[&rate=8.572883216981624E-4]:7.632644866364515,((3[&rate=0.0011849538230798505]:45.817508015792576,((4[&rate=7.326015251976917E-4]:14.797642399357528,((5[&rate=9.420904613396537E-5]:3.987052302684085,12[&rate=0.0010052997215017777]:3.987052302684085)[&rate=1.864894822157852E-4]:5.593831847805869,11[&rate=0.001700001678846806]:9.580884150489954)[&rate=0.0011849538230798505]:5.216758248867574)[&rate=5.774739505959804E-4]:2.7662562365818637,((6[&rate=0.0036990745234359275]:0.1699199597701889,7[&rate=0.0018816439821687746]:0.1699199597701889)[&rate=6.256171779621166E-4]:16.363805711489604,(8[&rate=0.001544417943725462]:4.114800847864767,(9[&rate=2.460393239622291E-4]:1.3858199523567927,10[&rate=7.326015251976917E-4]:1.3858199523567927)[&rate=0.002687101098335884]:2.728980895507974)[&rate=4.89921539895779E-4]:12.418924823395027)[&rate=0.002359518764560545]:1.030172964679597)[&rate=9.420904613396537E-5]:89.35360937985318)[&rate=4.89921539895779E-4]:5.753998100990572,13[&rate=1.569404449763382E-4]:29.071506116783155)[&rate=0.001090501850755216]:0.5172043647195181)[&rate=2.76782470791798E-4]:7.18972352067162,20[&rate=5.323552649696353E-4]:120.37843400217429)[&rate=2.460393239622291E-4]:3.9121385591439406,19[&rate=1.2668360047518508E-4]:124.29057256131823)[&rate=1.0]:0.0;
tree STATE_15000 = ((((((((1[&rate=0.002055578400062992]:11.437311962885005,(4[&rate=7.494974060286528E-4]:17.105723486386143,(((5[&rate=3.4262548582851505E-4]:4.49242522411744,(6[&rate=3.9637335793054143E-4]:1.715415192923687,12[&rate=3.1768440010553024E-4]:1.715415192923687)[&rate=6.034818619989435E-4]:2.777010031193753)[&rate=2.7092092451463386E-4]:1.6070076361775971,7[&rate=3.9637335793054143E-4]:6.099432860295037)[&rate=0.0011291843390007679]:7.655663152901736,(8[&rate=4.564639437980991E-4]:4.21439333670709,((9[&rate=0.005274534063329398]:0.6356493303958597,10[&rate=5.625787454996973E-4]:0.6356493303958597)[&rate=2.488277805475706E-4]:0.26463054246722306,11[&rate=1.6583565426533128E-4]:0.9002798728630828)[&rate=5.246895094142748E-4]:3.3141134638440075)[&rate=0.0011291843390007679]:9.540702676489683)[&rate=0.0011291843390007679]:3.3506274731893697)[&rate=1.0332845065825954E-4]:50.331588476498865)[&rate=8.08339700603727E-4]:1.3800533521797433,3[&rate=0.0017641489904081731]:7.717365315064747)[&rate=3.6880077886507933E-4]:4.375374656896881,(15[&rate=0.0011291843390007679]:0.31765715613012446,16[&rate=2.274180609828706E-4]:0.31765715613012446)[&rate=1.860874790422659E-4]:6.8750828158315045)[&rate=1.860874790422659E-4]:11.883484538611143,((2[&rate=2.488277805475706E-4]:6.0869427506312945,17[&rate=1.0332845065825954E-4]:6.0869427506312945)[&rate=0.0017641489904081731]:0.013057249368699786,14[&rate=0.0013799795353746126]:0.0)[&rate=0.0011291843390007679]:12.976224510572777)[&rate=0.001032026698557016]:4.326121080532502,13[&rate=7.494974060286528E-4]:5.802345591105279)[&rate=1.0332845065825954E-4]:0.6704807822110155,18[&rate=9.478666637796301E-4]:3.772826373316292)[&rate=0.0015485024255213107]:1.165497331960438,20[&rate=6.478662294774584E-4]:91.23832370527673)[&rate=6.963025231617652E-4]:6.328846153187854,19[&rate=1.0332845065825954E-4]:97.56716985846458)[&rate=1.0]:0.0;
tree STATE_30000 = (((((1[&rate=6.738578492617296E-4]:16.099999999999994,14[&rate=6.403949670076274E-4]:0.0)[&rate=9.481925803959976E-4]:14.200000000000003,18[&rate=8.379053232375598E-4]:0.0)[&rate=0.0019927745075691014]:14.977720756481048,((2[&rate=4.0832049827383234E-4]:21.500072151130027,13[&rate=3.257335280177654E-4]:3.9000721511300327)[&rate=9.481925803959976E-4]:3.431233168749273,((3[&rate=6.403949670076274E-4]:27.072011423876,16[&rate=5.796180818377889E-4]:22.172011423876)[&rate=6.090805705784522E-4]:1.144531491554062,(((4[&rate=3.257335280177654E-4]:26.564400668378333,(5[&rate=5.51760193452776E-4]:22.644707039230607,((((6[&rate=5.796180818377889E-4]:0.45293936682419617,11[&rate=1.0288618034410993E-4]:0.45293936682419617)[&rate=4.3011787005956247E-4]:3.36021041699506,7[&rate=3.663229989970739E-4]:3.8131497838192563)[&rate=4.3011787005956247E-4]:15.707688578087314,((8[&rate=3.663229989970739E-4]:2.2899612900120663,10[&rate=2.2303485401064735E-4]:2.2899612900120663)[&rate=2.2303485401064735E-4]:3.632717896301983,9[&rate=3.0567451047373357E-4]:5.922679186314049)[&rate=0.001014887781559877]:13.59815917559252)[&rate=3.257335280177654E-4]:0.33882502554191163,12[&rate=0.0028170771028527644]:19.85966338744848)[&rate=1.4544460587311215E-4]:2.785043651782125)[&rate=8.898018715210832E-4]:3.9196936291477265)[&rate=1.0288618034410993E-4]:54.54918400990109,15[&rate=3.0567451047373357E-4]:15.113584678279423)[&rate=6.738578492617296E-4]:6.586357401002729,17[&rate=7.912096800935174E-4]:21.699942079282152)[&rate=1.0288618034410993E-4]:1.61660083614791)[&rate=0.00165548498803861]:1.6147624044492375)[&rate=3.663229989970739E-4]:10.346415436601745)[&rate=3.0567451047373357E-4]:2.380185885678955,20[&rate=5.252975953804095E-4]:103.65790664216)[&rate=2.2303485401064735E-4]:5.418166794249657,19[&rate=1.750775784386714E-4]:109.07607343640966)[&rate=1.0]:0.0;
tree STATE_45000 = (((((((1[&rate=1.4886040898286188E-4]:29.427064225952833,(((((4[&rate=1.1817418929942753E-4]:3.862994376463962,8[&rate=3.295315729709489E-5]:3.862994376463962)[&rate=2.7207704838244634E-4]:49.212115772403756,(((5[&rate=5.4548591502835956E-5]:0.9954761898516763,12[&rate=9.75702702162965E-4]:0.9954761898516763)[&rate=1.0903188717515617E-4]:9.645709379718358,(9[&rate=5.213402328031298E-4]:3.5831317364311746,10[&rate=3.825537148925075E-4]:3.5831317364311746)[&rate=2.7207704838244634E-4]:7.058053833138859)[&rate=4.2103690769205803E-4]:20.790908102174757,(6[&rate=3.2046309134493465E-4]:7.162284197128907,(7[&rate=2.1599083892936502E-4]:0.40079279951903346,11[&rate=2.4914225304303825E-5]:0.40079279951903346)[&rate=1.4886040898286188E-4]:6.761491397609873)[&rate=3.2046309134493465E-4]:24.269809474615883)[&rate=2.7207704838244634E-4]:21.643016477122924)[&rate=2.7207704838244634E-4]:12.924889851132285,15[&rate=1.0033131891924789E-4]:0.0)[&rate=5.4548591502835956E-5]:8.002048427303777,(14[&rate=2.7207704838244634E-4]:0.0,16[&rate=2.1599083892936502E-4]:6.099999999999994)[&rate=5.213402328031298E-4]:1.9020484273037823)[&rate=8.404698050994262E-5]:6.880725413018794,17[&rate=6.772596668252268E-4]:14.882773840322571)[&rate=4.033859676425513E-5]:4.544290385630262)[&rate=6.167274765406075E-5]:0.15194966628082796,13[&rate=3.494090426188287E-4]:1.9790138922336666)[&rate=6.167274765406075E-5]:3.7194965557619923,18[&rate=2.948906549505541E-4]:2.998510447995656)[&rate=4.2103690769205803E-4]:1.100599696236884,3[&rate=4.033859676425513E-5]:29.299110144232536)[&rate=5.213402328031298E-4]:2.587663892174305,2[&rate=1.3802051731169718E-4]:26.986774036406842)[&rate=2.1599083892936502E-4]:18.89245654459785,20[&rate=4.2103690769205803E-4]:111.87923058100469)[&rate=5.213402328031298E-4]:18.939183985010487,19[&rate=4.033859676425513E-5]:130.81841456601518)[&rate=1.0]:0.0;
tree STATE_60000 = ((((((((1[&rate=1.4422252735483184E-4]:22.9955379820843,3[&rate=2.3548674221122477E-4]:17.8955379820843)[&rate=2.271177566528113E-4]:0.34083410541705916,((14[&rate=1.6220418967724537E-4]:0.0,16[&rate=1.9833312869621512E-4]:6.099999999999994)[&rate=3.119346071679771E-4]:0.7635664936651381,17[&rate=1.7459035460294287E-4]:6.863566493665132)[&rate=3.22680663554507E-4]:6.4728055938362274)[&rate=1.6220418967724537E-4]:3.593068990908691,2[&rate=1.6877606819841974E-4]:16.92944107841005)[&rate=2.1894060187722177E-4]:3.3705589215899465,18[&rate=2.0255963287644688E-4]:0.0)[&rate=2.487467980421809E-4]:2.4534465143665045,((4[&rate=2.0255963287644688E-4]:55.612567352259866,(((5[&rate=1.4422252735483184E-4]:0.9562808068684592,12[&rate=2.067091149558468E-4]:0.9562808068684592)[&rate=1.4422252735483184E-4]:26.576546892086906,((6[&rate=2.3548674221122477E-4]:13.366313070695455,11[&rate=2.1080769034254393E-4]:13.366313070695455)[&rate=1.8951680691802234E-4]:4.205754120620746,7[&rate=1.2698394214195188E-4]:17.5720671913162)[&rate=4.288792170076636E-4]:9.960760507639165)[&rate=2.3979091058758345E-4]:15.866281464149054,(8[&rate=1.2698394214195188E-4]:10.382896512818943,(9[&rate=1.7459035460294287E-4]:5.035859816902393,10[&rate=2.2301439119750142E-4]:5.035859816902393)[&rate=2.3979091058758345E-4]:5.34703669591655)[&rate=3.357544203189395E-4]:33.016212650285475)[&rate=3.119346071679771E-4]:12.213458189155446)[&rate=1.4422252735483184E-4]:10.387432647740134,15[&rate=2.067091149558468E-4]:0.0)[&rate=2.442029565264978E-4]:22.7534465143665)[&rate=2.6346575810176376E-4]:5.326032919068922,13[&rate=2.3126895878298356E-4]:10.47947943343543)[&rate=1.2698394214195188E-4]:10.265114738504522,20[&rate=4.288792170076636E-4]:104.34459417193995)[&rate=2.442029565264978E-4]:3.6791212127194513,19[&rate=1.7989505763809082E-4]:108.0237153846594)[&rate=1.0]:0.0;
tree STATE_75000 = ((((((((1[&rate=3.2512970568225467E-4]:11.291678740546672,(3[&rate=1.887188234828844E-4]:4.899999999999999,15[&rate=1.887188234828844E-4]:0.0)[&rate=2.9860903306706604E-4]:1.291678740546672)[&rate=3.5842767520192256E-4]:3.72795172210175,((4[&rate=3.5842767520192256E-4]:41.921204348438394,((5[&rate=1.2010200539992258E-4]:8.826415566014248,((9[&rate=2.3172109803553146E-4]:1.5051222103900386,11[&rate=3.2512970568225467E-4]:1.5051222103900386)[&rate=2.6639727506739283E-4]:3.3225798120771177,10[&rate=3.5842767520192256E-4]:4.8277020224671565)[&rate=2.4817940875795566E-4]:3.9987135435470913)[&rate=4.770940176816609E-4]:12.197261153208458,(6[&rate=4.350410355098027E-4]:4.105952746338058,7[&rate=4.770940176816609E-4]:4.105952746338058)[&rate=4.038800631510177E-4]:16.917723972884648)[&rate=2.165495477916777E-4]:20.897527629215688)[&rate=2.8705570464868563E-4]:7.388071519471694,(8[&rate=2.5703215307445933E-4]:5.471242542167829,12[&rate=1.2796053242157177E-4]:5.471242542167829)[&rate=2.0231109782008745E-4]:43.83803332574226)[&rate=1.7551594940549064E-4]:21.710354594738334)[&rate=1.3533219916168023E-4]:3.3467132239848922,14[&rate=1.5586214646420079E-4]:2.26634368663332)[&rate=1.887188234828844E-4]:11.22864095069356,(16[&rate=1.4919216754955548E-4]:19.402188270990024,17[&rate=3.2512970568225467E-4]:19.402188270990024)[&rate=2.397634437662983E-4]:0.19279636633685016)[&rate=1.2010200539992258E-4]:0.705015362673123,18[&rate=7.052248736938435E-5]:0.0)[&rate=1.7551594940549064E-4]:10.763423460356364,(2[&rate=2.0231109782008745E-4]:17.599999999999994,13[&rate=8.949145162837786E-5]:0.0)[&rate=1.6898046177082554E-4]:13.463423460356367)[&rate=3.1121607539663843E-4]:5.7050689585478125,20[&rate=4.770940176816609E-4]:102.76849241890417)[&rate=2.8705570464868563E-4]:0.2604825959667636,19[&rate=1.4919216754955548E-4]:103.02897501487094)[&rate=1.0]:0.0;
tree STATE_90000 = (((((1[&rate=2.2344214508283533E-4]:9.866202506569664,3[&rate=3.3129037961302237E-4]:4.7662025065696625)[&rate=1.791978935684004E-4]:17.73379749343033,13[&rate=6.418566198481194E-4]:0.0)[&rate=5.328329089486923E-4]:6.560712098382027,((2[&rate=2.3926481795248872E-4]:9.352873388657699,((((4[&rate=1.890764722707462E-4]:60.09838203916202,(((5[&rate=2.6272405623966385E-4]:1.203039849909327,12[&rate=3.1259255645886525E-4]:1.203039849909327)[&rate=2.786585337284562E-4]:12.126337216824776,((6[&rate=2.0695888262081338E-4]:0.1749410407364612,11[&rate=5.328329089486923E-4]:0.1749410407364612)[&rate=2.7063704259162945E-4]:6.925773405546456,7[&rate=1.556240620031005E-4]:7.100714446282917)[&rate=1.556240620031005E-4]:6.228662620451186)[&rate=2.3140358100687952E-4]:27.82461319330683,((8[&rate=1.3968765890229887E-4]:0.726005325757064,9[&rate=3.217538231393153E-4]:0.726005325757064)[&rate=4.741967496047824E-4]:4.573250007488714,10[&rate=2.4707661902219894E-4]:5.299255333245778)[&rate=2.3140358100687952E-4]:35.85473492679516)[&rate=2.9517543788429106E-4]:18.944391779121084)[&rate=2.8682528334395934E-4]:8.545273063703931,15[&rate=4.741967496047824E-4]:2.6436551028659494)[&rate=6.418566198481194E-4]:5.012928686518677,(16[&rate=4.16401895588835E-4]:5.919479462937815,17[&rate=4.0126471460559835E-4]:5.919479462937815)[&rate=1.890764722707462E-4]:1.7371043264468113)[&rate=3.8745920952217716E-4]:1.0548965053526729,14[&rate=4.332234859510678E-4]:2.611480294737305)[&rate=2.9517543788429106E-4]:0.6413930939203993)[&rate=1.1417451727910698E-4]:10.947126611342298,18[&rate=1.791978935684004E-4]:0.0)[&rate=3.8745920952217716E-4]:3.860712098382024)[&rate=1.791978935684004E-4]:0.03755550152594367,20[&rate=5.328329089486923E-4]:90.19826759990796)[&rate=2.4707661902219894E-4]:22.670048576205687,19[&rate=1.556240620031005E-4]:112.86831617611365)[&rate=1.0]:0.0;
tree STATE_105000 = (((((((1[&rate=1.7183585071051737E-4]:27.432218042671323,16[&rate=5.30567486336784E-4]:17.432218042671323)[&rate=3.4633253351915483E-4]:2.867781957328674,18[&rate=3.1658957866046534E-4]:0.0)[&rate=2.2176636040009137E-4]:3.3944476460137025,(3[&rate=4.072517720622343E-4]:24.689989374261607,(((((4[&rate=3.9341634159512675E-4]:0.31052969547777665,11[&rate=1.7183585071051737E-4]:0.31052969547777665)[&rate=4.222735362128687E-4]:6.411109531406667,(5[&rate=3.261297771469016E-4]:3.249419683494034,12[&rate=2.3042713423283658E-4]:3.249419683494034)[&rate=3.261297771469016E-4]:3.4722195433904095)[&rate=2.0361255305366484E-4]:33.91650778419784,((6[&rate=1.7183585071051737E-4]:4.046449447738102,(7[&rate=4.072517720622343E-4]:2.7260085351684555,8[&rate=3.685024700529164E-4]:2.7260085351684555)[&rate=2.7245893541727397E-4]:1.3204409125696461)[&rate=3.261297771469016E-4]:23.082285070010347,(9[&rate=3.4633253351915483E-4]:3.846975381772628,10[&rate=1.9386414059268563E-4]:3.846975381772628)[&rate=6.865259679168069E-4]:23.28175913597582)[&rate=4.571155409207783E-4]:13.509412493333834)[&rate=1.7183585071051737E-4]:37.44878394157706,14[&rate=3.1658957866046534E-4]:5.98693095265935)[&rate=4.7788448871446395E-4]:6.532753927271671,17[&rate=3.5713007783310974E-4]:18.619684879931015)[&rate=4.222735362128687E-4]:1.170304494330594)[&rate=2.1286364628053786E-4]:3.904458271752091)[&rate=1.7183585071051737E-4]:5.631623739110694,15[&rate=1.7183585071051737E-4]:29.326071385124393)[&rate=6.139252139334424E-4]:2.97376546736416,(2[&rate=2.3892659894191414E-4]:22.820575271587686,13[&rate=4.7788448871446395E-4]:5.220575271587691)[&rate=5.019147972101472E-4]:9.479261580900868)[&rate=3.4633253351915483E-4]:2.154076736885173,20[&rate=5.30567486336784E-4]:100.45391358937373)[&rate=2.7245893541727397E-4]:0.10703700415433559,19[&rate=1.5849370347321545E-4]:100.56095059352806)[&rate=1.0]:0.0;
tree STATE_120000 = ((((((((1[&rate=3.0224376791976705E-4]:10.0,15[&rate=1.7701672554836184E-4]:0.0)[&rate=2.8901805874490016E-4]:0.5517695241949383,16[&rate=3.156255203486944E-4]:0.5517695241949383)[&rate=3.720368119774742E-4]:10.816083466469422,(14[&rate=3.156255203486944E-4]:0.0,17[&rate=5.162359282037529E-4]:6.099999999999994)[&rate=4.0296050024324223E-4]:5.267852990664366)[&rate=2.627495585156097E-4]:6.232147009335634,13[&rate=8.074788451954822E-4]:0.0)[&rate=2.627495585156097E-4]:4.302543872447259,(2[&rate=5.162359282037529E-4]:0.6071287654057045,3[&rate=8.074788451954822E-4]:5.507128765405703)[&rate=3.872069147762016E-4]:21.29541510704155)[&rate=3.720368119774742E-4]:2.215683776808092,((((4[&rate=5.162359282037529E-4]:3.20200967537684,8[&rate=4.547349157756814E-4]:3.20200967537684)[&rate=7.0144172119643E-4]:8.066426152993671,(5[&rate=6.252604440531885E-4]:6.164056194763746,12[&rate=6.252604440531885E-4]:6.164056194763746)[&rate=2.627495585156097E-4]:5.104379633606764)[&rate=3.720368119774742E-4]:20.5897774543221,((6[&rate=9.827519710492111E-4]:2.075755631928077,7[&rate=7.0144172119643E-4]:2.075755631928077)[&rate=4.1939154151581046E-4]:16.553479190120626,((9[&rate=2.7587878471614435E-4]:1.8289448024355208,11[&rate=7.493321147195452E-4]:1.8289448024355208)[&rate=2.7587878471614435E-4]:1.577260548514355,10[&rate=4.547349157756814E-4]:3.4062053509498758)[&rate=7.493321147195452E-4]:15.22302947109883)[&rate=2.2244056399970923E-4]:13.228978460643905)[&rate=1.3658938767421597E-4]:54.44178671730739,18[&rate=0.0015127791015022687]:0.0)[&rate=3.5736671884928627E-4]:3.8182276492553484)[&rate=2.7587878471614435E-4]:2.127236092957162,20[&rate=5.938319857028079E-4]:92.24546374221251)[&rate=3.720368119774742E-4]:6.620820570243211,19[&rate=1.9322994404650634E-4]:98.86628431245572)[&rate=1.0]:0.0;
tree STATE_135000 = ((((((1[&rate=5.958425261867208E-4]:12.709556496296187,15[&rate=2.2261188229488638E-4]:2.7095564962961873)[&rate=1.9926598720191642E-4]:3.390443503703807,14[&rate=3.043042283922289E-4]:0.0)[&rate=2.784239234288743E-4]:18.67378467187359,(((4[&rate=2.3287302193000366E-4]:53.729005247924555,(((5[&rate=2.518766394978543E-4]:2.9281414600257176,9[&rate=3.7932372808524106E-4]:2.9281414600257176)[&rate=4.1361759916424585E-4]:0.9134139687152127,10[&rate=3.130074403644991E-4]:3.8415554287409304)[&rate=3.901725251232581E-4]:25.24021643040588,(((6[&rate=3.399176001772562E-4]:10.850031867184192,(7[&rate=4.7138610962169856E-4]:0.847847613048947,11[&rate=3.6893985163105017E-4]:0.847847613048947)[&rate=1.8500851388334128E-4]:10.002184254135246)[&rate=4.015700460407742E-4]:0.4054022171191125,12[&rate=3.043042283922289E-4]:11.255434084303305)[&rate=5.612576620281572E-4]:15.600774615269833,8[&rate=2.2261188229488638E-4]:26.856208699573138)[&rate=2.115448166327644E-4]:2.225563159573671)[&rate=2.8705536088741943E-4]:24.647233388777746)[&rate=7.111463767821503E-4]:12.270994752075445,17[&rate=2.6972370392174504E-4]:0.0)[&rate=2.115448166327644E-4]:15.738078993919402,16[&rate=4.55087169809192E-4]:15.738078993919402)[&rate=3.043042283922289E-4]:9.035705677954184)[&rate=3.901725251232581E-4]:2.6887374998268143,(((2[&rate=3.3077332648947513E-4]:20.299999999999997,18[&rate=1.669573987492201E-4]:0.0)[&rate=2.608975973707673E-4]:3.1156599986903615,13[&rate=3.3077332648947513E-4]:5.815659998690364)[&rate=2.8705536088741943E-4]:0.23058256748444705,3[&rate=4.55087169809192E-4]:28.546242566174804)[&rate=8.613768402776763E-4]:3.816279605525594)[&rate=2.956673446341289E-4]:0.2549018056509027,20[&rate=5.098536026778082E-4]:93.7174239773513)[&rate=3.130074403644991E-4]:2.914417554485496,19[&rate=1.669573987492201E-4]:96.6318415318368)[&rate=1.0]:0.0;
tree STATE_150000 = ((((((1[&rate=4.2140369291113563E-4]:23.259017585389913,17[&rate=3.8728988531998597E-4]:13.259017585389913)[&rate=4.2140369291113563E-4]:7.040982414610085,18[&rate=5.071985638085087E-4]:0.0)[&rate=1.4925217207781296E-4]:7.442654947762833,((2[&rate=2.224735346224206E-4]:10.422301758288299,3[&rate=1.7586925628382293E-4]:15.322301758288297)[&rate=8.646367272306339E-5]:10.448114508531958,(((4[&rate=7.560242217920003E-4]:1.4422341457364187,11[&rate=4.0380919491308197E-4]:1.4422341457364187)[&rate=1.630747956570752E-4]:5.414685122808506,8[&rate=3.5688034620121604E-4]:6.8569192685449245)[&rate=1.3370999848031376E-4]:68.4618827500213,(((5[&rate=1.4925217207781296E-4]:0.757776316652856,12[&rate=5.343358800540724E-4]:0.757776316652856)[&rate=6.001746928142867E-4]:30.001454780969897,(6[&rate=1.630747956570752E-4]:13.916453850139167,7[&rate=2.224735346224206E-4]:13.916453850139167)[&rate=5.649678403134322E-4]:16.842777247483586)[&rate=2.1117477125899816E-4]:3.0262023940733513,(9[&rate=1.7586925628382293E-4]:3.239033121391396,10[&rate=5.649678403134322E-4]:3.239033121391396)[&rate=4.2140369291113563E-4]:30.546400370304706)[&rate=1.997250979512285E-4]:41.53336852687013)[&rate=5.071985638085087E-4]:11.551614248254026)[&rate=4.0380919491308197E-4]:6.872238680942573)[&rate=2.224735346224206E-4]:12.907925514695961,((13[&rate=5.343358800540724E-4]:0.30477282567184716,(14[&rate=1.1484762843150418E-4]:3.3596913291320476,15[&rate=6.41603084189954E-4]:9.459691329132042)[&rate=2.3371177340317E-4]:8.4450814965398)[&rate=4.4026465955352925E-4]:1.9819215517244686,16[&rate=3.8728988531998597E-4]:19.88669437739631)[&rate=4.0380919491308197E-4]:20.76388608506248)[&rate=6.001746928142867E-4]:2.124691564557054,20[&rate=4.8280946912862614E-4]:108.77527202701584)[&rate=2.3371177340317E-4]:16.396923276783454,19[&rate=8.646367272306339E-5]:125.1721953037993)[&rate=1.0]:0.0;
tree STATE_165000 = ((((((1[&rate=2.4539543771443786E-4]:15.454042034988973,3[&rate=5.255731620313768E-4]:10.354042034988971)[&rate=6.826936467389702E-4]:11.348471701817445,((((4[&rate=7.672009086307759E-4]:4.959255273415846,8[&rate=3.018324922325035E-4]:4.959255273415846)[&rate=3.6385727995643795E-4]:2.2640965404001907,11[&rate=6.274445294987302E-4]:7.223351813816037)[&rate=1.9335043902462033E-4]:46.532760633842074,(((5[&rate=2.1565859963394314E-4]:0.3672417288257611,12[&rate=4.006545188979964E-4]:0.3672417288257611)[&rate=1.9335043902462033E-4]:8.597758952956092,(9[&rate=3.526788578267872E-4]:1.9947657478919052,10[&rate=2.54853994399357E-4]:1.9947657478919052)[&rate=3.6385727995643795E-4]:6.970234933889947)[&rate=5.01747032416574E-4]:22.851403694187386,(6[&rate=4.2897860421874795E-4]:6.301494097001432,7[&rate=2.54853994399357E-4]:6.301494097001432)[&rate=3.018324922325035E-4]:25.514910278967807)[&rate=2.2589943697916363E-4]:21.939708071688873)[&rate=1.660252335293927E-4]:17.447012355398257,16[&rate=3.1150777618752087E-4]:5.203124803056369)[&rate=1.8064445030610402E-4]:11.599388933750049)[&rate=1.4773753635296917E-4]:11.02382955436832,13[&rate=2.0488945403082152E-4]:10.226343291174743)[&rate=2.828980250631513E-4]:2.8563552281661373,((((2[&rate=3.526788578267872E-4]:6.099999999999994,14[&rate=2.7354995255679765E-4]:0.0)[&rate=2.4539543771443786E-4]:6.76564674515474,15[&rate=3.4191384332308026E-4]:12.865646745154734)[&rate=3.526788578267872E-4]:2.9310201434978325,17[&rate=4.2897860421874795E-4]:15.796666888652567)[&rate=4.006545188979964E-4]:8.731932104546289,18[&rate=1.8064445030610402E-4]:4.228598993198858)[&rate=2.828980250631513E-4]:6.154099526142019)[&rate=4.61884594043541E-4]:0.4914781196469846,20[&rate=5.01747032416574E-4]:97.17417663898786)[&rate=2.828980250631513E-4]:3.8579349503688434,19[&rate=1.4773753635296917E-4]:101.0321115893567)[&rate=1.0]:0.0;
tree STATE_180000 = (((((1[&rate=4.3020335460755305E-4]:18.2803707104285,14[&rate=7.053145721846247E-4]:2.1803707104285053)[&rate=1.413070649818781E-4]:7.453859405576722,((2[&rate=5.115785582951763E-4]:3.789373269703816,(4[&rate=2.9487451871542514E-4]:37.1249188694152,(((5[&rate=2.9487451871542514E-4]:7.309866429332768,12[&rate=1.179219206933231E-4]:7.309866429332768)[&rate=5.115785582951763E-4]:4.156872029352435,(9[&rate=2.2461166880890934E-4]:2.096767326867824,10[&rate=2.465186497670576E-4]:2.096767326867824)[&rate=0.0012875215401498901]:9.36997113181738)[&rate=3.702926454625112E-4]:7.9592749495159225,(((6[&rate=3.083020909323778E-4]:0.039278714690048844,11[&rate=1.413070649818781E-4]:0.039278714690048844)[&rate=7.96216784724609E-4]:1.8644761091719249,7[&rate=7.96216784724609E-4]:1.9037548238619737)[&rate=3.88604941831462E-4]:6.064022820707529,8[&rate=1.8310877417341596E-4]:7.9677776445695025)[&rate=2.0361872064066135E-4]:11.458235763631624)[&rate=3.373864375924176E-4]:17.69890546121407)[&rate=3.373864375924176E-4]:32.66445440028862)[&rate=2.1402725516823763E-4]:4.2101742988090365,(15[&rate=5.885908751672597E-4]:7.183279628088002,17[&rate=3.532854431457846E-4]:7.183279628088002)[&rate=3.702926454625112E-4]:0.8162679404248507)[&rate=8.833637957948219E-5]:7.734682547492369)[&rate=2.820591260558102E-4]:9.256803062410924,(((3[&rate=4.084695591019813E-4]:23.25411157888484,16[&rate=8.833637957948219E-5]:18.35411157888484)[&rate=4.8108652421816343E-4]:5.233475384101595,13[&rate=1.300171952761802E-4]:5.987586962986441)[&rate=9.4153789685443E-4]:0.02980913998635515,18[&rate=0.0012875215401498901]:3.3173961029727934)[&rate=3.532854431457846E-4]:1.3736370754433551)[&rate=3.88604941831462E-4]:0.09627164472067307,20[&rate=5.468339386326734E-4]:91.08730482313682)[&rate=0.0012875215401498901]:2.315427134083393,19[&rate=1.0445905014897114E-4]:93.40273195722021)[&rate=1.0]:0.0;
tree STATE_195000 = (((((1[&rate=2.8645448068737625E-4]:36.73521750778039,((((4[&rate=2.377720907259695E-4]:43.708299104774774,(((5[&rate=3.911085915990204E-4]:10.98349844064797,12[&rate=2.2310155645104566E-4]:10.98349844064797)[&rate=5.536638942098791E-4]:10.894897879200197,(6[&rate=2.693448196469481E-4]:5.854004798355303,(7[&rate=5.750746591816948E-5]:2.539589924101908,11[&rate=2.2310155645104566E-4]:2.539589924101908)[&rate=2.531541253113158E-4]:3.314414874253395)[&rate=1.6989707905713794E-4]:16.024391521492866)[&rate=0.0012033201522208665]:5.060967859857897,(8[&rate=1.4555930496516165E-4]:4.583360361201274,(9[&rate=1.9555489456027245E-4]:1.7492475494816915,10[&rate=7.923211303659037E-4]:1.7492475494816915)[&rate=4.7805302024938034E-4]:2.8341128117195824)[&rate=4.7805302024938034E-4]:22.35600381850479)[&rate=2.531541253113158E-4]:16.76893492506871)[&rate=1.2192650260126986E-4]:30.35390140896481,15[&rate=3.669771976210646E-4]:8.062200513739583)[&rate=4.4620174669278927E-4]:12.237799486260414,18[&rate=1.2192650260126986E-4]:0.0)[&rate=1.9555489456027245E-4]:3.8917982998623586,((13[&rate=1.9555489456027245E-4]:4.206216931647106,14[&rate=2.8645448068737625E-4]:15.706216931647106)[&rate=9.814848400437705E-5]:0.7486299778978776,16[&rate=4.173863096056522E-4]:22.554846909544978)[&rate=5.536638942098791E-4]:1.6369513903173782)[&rate=6.526378113132811E-4]:2.543419207918035)[&rate=1.4555930496516165E-4]:7.094096655039422,3[&rate=1.8252564429275964E-4]:38.72931416281981)[&rate=5.135870258120947E-4]:1.6623875886959638,(2[&rate=4.173863096056522E-4]:21.92048217914227,17[&rate=2.531541253113158E-4]:21.92048217914227)[&rate=3.2395995453520323E-4]:13.571219572373508)[&rate=3.446790978413398E-4]:3.0676942264379647,20[&rate=4.173863096056522E-4]:104.55939597795374)[&rate=1.5759910740005935E-4]:3.480229576795921,19[&rate=1.4555930496516165E-4]:108.03962555474966)[&rate=1.0]:0.0;
tree STATE_210000 = ((((((1[&rate=3.6818316675703267E-4]:30.299999999999997,18[&rate=2.7050167256672744E-4]:0.0)[&rate=2.4302874916435585E-4]:3.1132409277179676,(14[&rate=4.703592371311877E-4]:0.0,((15[&rate=1.6658082220147945E-4]:0.2126390661943276,16[&rate=1.4112229021090862E-4]:0.2126390661943276)[&rate=1.8760525436229404E-4]:4.476646757840271,17[&rate=2.612257748376411E-4]:4.689285824034599)[&rate=1.242868636199628E-4]:1.4107141759653956)[&rate=2.799535742467095E-4]:17.31324092771797)[&rate=3.9660291184578103E-4]:6.414365385023075,(((4[&rate=2.250041290414592E-4]:0.7833281347409475,11[&rate=1.8760525436229404E-4]:0.7833281347409475)[&rate=2.9956568577336215E-4]:43.18390157125053,((5[&rate=1.5470021624679122E-4]:24.692393922983836,12[&rate=1.4112229021090862E-4]:24.692393922983836)[&rate=2.250041290414592E-4]:10.620666640402025,((6[&rate=5.999511878356702E-4]:4.370949248630956,7[&rate=2.7050167256672744E-4]:4.370949248630956)[&rate=2.4302874916435585E-4]:28.20868795242832,((8[&rate=4.2982875115139216E-4]:2.2171627059513406,9[&rate=4.94722702789882E-4]:2.2171627059513406)[&rate=2.8962592057350664E-4]:0.763450221393716,10[&rate=1.4112229021090862E-4]:2.9806129273450566)[&rate=2.9956568577336215E-4]:29.59902427371422)[&rate=1.7743047403702422E-4]:2.733423362326583)[&rate=3.5529640424411773E-4]:8.654169142605618)[&rate=1.5470021624679122E-4]:50.461867305461915,13[&rate=2.0672896350905313E-4]:10.829097011453399)[&rate=2.7050167256672744E-4]:1.3985093012876462)[&rate=3.204567405842452E-4]:3.647654007003368,(2[&rate=3.3152846412279124E-4]:14.541665000012514,3[&rate=2.799535742467095E-4]:19.441665000012513)[&rate=2.1592920028517924E-4]:18.933595319731893)[&rate=2.5208262320407834E-4]:5.449711707295549,20[&rate=5.571624468478168E-4]:104.92497202703996)[&rate=4.489577895631104E-4]:1.0730956360533952,19[&rate=1.242868636199628E-4]:105.99806766309335)[&rate=1.0]:0.0;
tree STATE_225000 = (((((((1[&rate=1.1933783793519764E-4]:22.631031127191193,(((4[&rate=2.7133910423908524E-4]:11.467998863881816,8[&rate=1.727868579498011E-4]:11.467998863881816)[&rate=1.7962422180996994E-4]:46.19650794154548,(((5[&rate=1.9331540430248827E-4]:28.027791503811166,12[&rate=1.283877971641263E-4]:28.027791503811166)[&rate=3.7630954529479474E-4]:14.708605469604976,(9[&rate=1.8645466581620503E-4]:3.9992491962338423,(10[&rate=2.292500757111277E-4]:0.6907885602459374,11[&rate=3.7630954529479474E-4]:0.6907885602459374)[&rate=2.450376806378076E-4]:3.308460635987905)[&rate=3.41899583625433E-4]:38.7371477771823)[&rate=1.3664560132535395E-4]:0.6269790918912008,(6[&rate=4.2319560533368136E-4]:3.8155819659913415,7[&rate=3.579960456096335E-4]:3.8155819659913415)[&rate=2.2173386312222172E-4]:39.547794099316)[&rate=2.533996088884991E-4]:14.301130740119952)[&rate=1.0898461431038809E-4]:18.69940559061196,17[&rate=3.7630954529479474E-4]:10.363912396039254)[&rate=2.1441687213589184E-4]:2.267118731151939)[&rate=2.7133910423908524E-4]:4.110240202222656,(2[&rate=1.6590052208705018E-4]:6.25986507874596,3[&rate=1.4438419704652087E-4]:11.159865078745959)[&rate=4.2319560533368136E-4]:10.481406250667888)[&rate=1.5177025613734383E-4]:2.9194044702317257,(14[&rate=4.985396505931517E-4]:0.0,16[&rate=2.3700385428353864E-4]:6.099999999999994)[&rate=4.5528855288826375E-4]:13.56067579964558)[&rate=2.533996088884991E-4]:2.1822559485442383,13[&rate=5.652012145064934E-4]:4.242931748189818)[&rate=3.9762093335857007E-4]:14.64758826573781,(15[&rate=2.6214505395510127E-4]:20.605792767270643,18[&rate=4.2319560533368136E-4]:0.3057927672706455)[&rate=9.61306347966209E-5]:15.884727246656979)[&rate=1.8645466581620503E-4]:8.368281969723725,20[&rate=4.2319560533368136E-4]:110.85880198365135)[&rate=1.7962422180996994E-4]:6.949171231799781,19[&rate=1.1933783793519764E-4]:117.80797321545113)[&rate=1.0]:0.0;
tree STATE_240000 = ((((((((1[&rate=1.1560948451165932E-4]:10.0,16[&rate=5.109495716032782E-4]:0.0)[&rate=3.317892175293219E-4]:3.3071721046010794,15[&rate=2.261453348329489E-4]:3.3071721046010794)[&rate=9.883057626679622E-5]:3.5371950879605834,(14[&rate=1.954366306230529E-4]:0.24211701379084616,17[&rate=1.1560948451165932E-4]:6.3421170137908405)[&rate=1.954366306230529E-4]:0.5022501787708222)[&rate=2.692865091265135E-4]:3.5558752823644397,2[&rate=4.345112085218867E-4]:10.400242474926102)[&rate=2.1584164599040964E-4]:16.067755513163235,(((4[&rate=3.613936868225402E-4]:34.834362996330114,(5[&rate=9.040356085053592E-4]:3.3157043933352908,12[&rate=5.438148046532708E-4]:3.3157043933352908)[&rate=2.1584164599040964E-4]:31.518658602994822)[&rate=1.4187513616149746E-4]:6.169638413271102,((((6[&rate=3.317892175293219E-4]:2.578070005919719,7[&rate=2.581084725717989E-4]:2.578070005919719)[&rate=3.317892175293219E-4]:1.800457804850852,11[&rate=2.261453348329489E-4]:4.378527810770571)[&rate=3.317892175293219E-4]:10.069996377862536,8[&rate=1.6429556420637467E-4]:14.448524188633106)[&rate=2.927610672643865E-4]:9.088317199832114,(9[&rate=3.317892175293219E-4]:3.354119901519682,10[&rate=2.472272300599469E-4]:3.354119901519682)[&rate=7.728289813910368E-4]:20.18272148694554)[&rate=2.261453348329489E-4]:17.467160021135996)[&rate=2.3658997652197086E-4]:45.29599859039878,18[&rate=5.825646697830106E-4]:0.0)[&rate=2.692865091265135E-4]:6.16799798808934)[&rate=4.5716281471621723E-4]:7.348744067995483,(3[&rate=5.438148046532708E-4]:32.30999800693407,13[&rate=1.954366306230529E-4]:9.80999800693408)[&rate=2.692865091265135E-4]:6.4067440491507455)[&rate=9.883057626679622E-5]:4.121237459612331,20[&rate=3.776422038995021E-4]:103.93797951569715)[&rate=2.261453348329489E-4]:0.7487814937203723,19[&rate=1.5336728227540402E-4]:104.68676100941752)[&rate=1.0]:0.0;
tree STATE_255000 = ((((((((1[&rate=3.251682857084418E-4]:4.128714555703645,(4[&rate=2.7264975289013313E-4]:40.4714193785102,(((5[&rate=1.1144059962108651E-4]:13.40222042508328,(6[&rate=2.5799996073148267E-4]:7.449633620671686,7[&rate=1.0367957017197979E-4]:7.449633620671686)[&rate=3.05958218525542E-4]:5.952586804411594)[&rate=8.159808198039331E-4]:6.811485601973905,(9[&rate=4.3100727392844033E-4]:5.289626476286055,10[&rate=9.587277642840939E-5]:5.289626476286055)[&rate=5.182063456959323E-4]:14.924079550771129)[&rate=1.879488312131006E-4]:3.410579620468635,((8[&rate=3.506276477927124E-5]:1.2967182643179898,11[&rate=2.444156195813144E-4]:1.2967182643179898)[&rate=2.8855556420448903E-4]:9.218620336170131,12[&rate=1.6016228799106642E-4]:10.515338600488121)[&rate=2.8855556420448903E-4]:13.108947047037699)[&rate=2.444156195813144E-4]:16.84713373098438)[&rate=3.506276477927124E-5]:19.657295177193447)[&rate=1.432024508911435E-4]:5.871285444296355,15[&rate=3.7079721531344597E-4]:0.0)[&rate=1.1144059962108651E-4]:6.665141108492691,17[&rate=6.701287138892215E-4]:6.665141108492691)[&rate=2.0865248497946686E-4]:11.576656388404658,2[&rate=1.1922206210905637E-4]:18.241797496897348)[&rate=4.6992003601034805E-4]:2.058202503102649,18[&rate=5.064072954838388E-5]:0.0)[&rate=3.465957833757402E-4]:13.470617569133552,((3[&rate=1.1144059962108651E-4]:22.499999999999993,13[&rate=1.783088523269378E-4]:0.0)[&rate=5.811857960879061E-4]:6.548834741795602,(14[&rate=1.515565797303715E-4]:0.0,16[&rate=4.6992003601034805E-4]:6.099999999999994)[&rate=4.3100727392844033E-4]:18.048834741795602)[&rate=8.159808198039331E-4]:9.621782827337952)[&rate=1.9804156186505986E-4]:7.619737456535574,20[&rate=4.6992003601034805E-4]:107.39035502566912)[&rate=1.783088523269378E-4]:7.425549233972845,19[&rate=1.2707839549091297E-4]:114.81590425964197)[&rate=1.0]:0.0;
tree STATE_270000 = ((((((1[&rate=2.76023151649826E-4]:31.684953291579035,(2[&rate=4.7936897080797674E-4]:6.130532985611353,17[&rate=1.953861524177235E-4]:6.130532985611353)[&rate=2.3428819620337582E-4]:15.554420305967682)[&rate=4.193986533324237E-4]:3.253918698650537,(4[&rate=2.0847254169499967E-4]:64.43705961727231,(((5[&rate=1.3869017488584164E-4]:2.030958150747151,12[&rate=1.0341746569951605E-4]:2.030958150747151)[&rate=5.310402617523514E-4]:24.403179942172535,(6[&rate=2.3428819620337582E-4]:22.40332831465957,7[&rate=1.2519534051301105E-4]:22.40332831465957)[&rate=2.543701551690827E-4]:4.030809778260114)[&rate=2.837691675191883E-4]:17.731824620166183,(((8[&rate=2.0197665158815567E-4]:0.6972719727463929,10[&rate=1.5852164967136378E-4]:0.6972719727463929)[&rate=3.6589549196051256E-4]:2.051867105160149,11[&rate=3.9860699145067945E-4]:2.749139077906542)[&rate=1.8864949235380813E-4]:3.81589257070016,9[&rate=3.4026856854249343E-4]:6.565031648606702)[&rate=2.918613455553235E-4]:37.60093106447917)[&rate=2.4086300731957503E-4]:20.271096904186443)[&rate=1.0341746569951605E-4]:26.50181237295726)[&rate=2.6857061538879747E-4]:11.242669901490899,(((3[&rate=6.428678748459723E-4]:28.890979960360376,18[&rate=2.918613455553235E-4]:3.69097996036038)[&rate=3.6589549196051256E-4]:2.431777110686724,13[&rate=2.4754668823303205E-4]:8.822757071047107)[&rate=1.817015182121433E-4]:0.415294974604663,(14[&rate=2.6857061538879747E-4]:0.0,15[&rate=1.2519534051301105E-4]:6.099999999999994)[&rate=3.8109257362542676E-4]:20.73805204565177)[&rate=1.7445568609151285E-4]:9.343489846068707)[&rate=2.918613455553235E-4]:5.402416548310114,16[&rate=3.093469644354738E-4]:41.583958440030585)[&rate=1.2519534051301105E-4]:16.834744959444166,20[&rate=3.8109257362542676E-4]:124.41870339947475)[&rate=1.3869017488584164E-4]:8.551570107699078,19[&rate=1.2519534051301105E-4]:132.97027350717383)[&rate=1.0]:0.0;
tree STATE_285000 = ((((((((1[&rate=2.4014964956206204E-4]:13.498269190828267,(16[&rate=2.4014964956206204E-4]:2.584710905496749,17[&rate=3.6017120089213393E-4]:2.584710905496749)[&rate=2.0996329394482486E-4]:0.9135582853315185)[&rate=3.2912952650638596E-4]:0.2449391454866543,((4[&rate=1.509869748278248E-4]:58.87268868177782,(((5[&rate=2.4674363856851806E-4]:2.287283054887426,12[&rate=2.961968027376435E-4]:2.287283054887426)[&rate=2.1836901292215843E-4]:19.83587127051132,(9[&rate=3.5180524595381635E-4]:2.9203821955727682,10[&rate=4.659489305824004E-4]:2.9203821955727682)[&rate=4.933524937593106E-4]:19.202772129825977)[&rate=2.4014964956206204E-4]:13.178229004236137,(((6[&rate=4.659489305824004E-4]:0.3538402987079846,8[&rate=4.659489305824004E-4]:0.3538402987079846)[&rate=6.188016875186804E-4]:0.9270990660634427,11[&rate=4.933524937593106E-4]:1.2809393647714273)[&rate=4.1327069981016184E-4]:6.173910310562643,7[&rate=1.509869748278248E-4]:7.454849675334071)[&rate=2.0996329394482486E-4]:27.84653365430081)[&rate=3.7865614432387387E-4]:23.571305352142936)[&rate=3.890532215523933E-4]:7.1273113182221834,15[&rate=2.53144573715738E-4]:0.0)[&rate=3.3635211048070075E-4]:3.743208336314922)[&rate=1.8937979639032748E-4]:5.682704644095054,14[&rate=4.1327069981016184E-4]:3.3259129804099814)[&rate=3.0248028081748E-4]:10.874087019590021,18[&rate=2.53144573715738E-4]:0.0)[&rate=2.3329231502664067E-4]:4.228747959287958,13[&rate=4.278583008025215E-4]:6.928747959287961)[&rate=2.0996329394482486E-4]:0.6288162419446479,(2[&rate=1.749894857110432E-4]:12.366557542314638,3[&rate=2.4674363856851806E-4]:17.266557542314636)[&rate=3.154355278424633E-4]:12.791006658917965)[&rate=2.655758999940092E-4]:5.017108030750791,20[&rate=5.339234779572949E-4]:96.1746722319834)[&rate=2.4674363856851806E-4]:0.5931829525228238,19[&rate=1.749894857110432E-4]:96.76785518450622)[&rate=1.0]:0.0;
tree STATE_300000 = (((((((1[&rate=1.6971953098321026E-4]:18.294320407121035,16[&rate=8.463862380905521E-4]:8.294320407121035)[&rate=3.4049302990894065E-4]:7.271446014907255,(14[&rate=5.899568095333532E-4]:0.0,17[&rate=4.2516160879283875E-4]:6.099999999999994)[&rate=2.538734847300973E-4]:9.465766422028295)[&rate=4.3858732067483444E-4]:0.45399346111062755,((4[&rate=1.6971953098321026E-4]:64.20448203178876,(((5[&rate=1.8767003064027162E-4]:0.0846432474990774,12[&rate=3.055185141020201E-4]:0.0846432474990774)[&rate=2.714770520885567E-4]:16.447155935670903,(6[&rate=3.140730686518685E-4]:5.434405480619523,7[&rate=2.885491510565805E-4]:5.434405480619523)[&rate=2.714770520885567E-4]:11.097393702550457)[&rate=3.227272290839025E-4]:15.944476424206862,((8[&rate=3.689381687383674E-4]:3.6554424434868067,11[&rate=3.689381687383674E-4]:3.6554424434868067)[&rate=5.064485508249222E-4]:5.0438831104589195,(9[&rate=2.970241461925909E-4]:2.506429498118365,10[&rate=3.4049302990894065E-4]:2.506429498118365)[&rate=2.885491510565805E-4]:6.192896055827362)[&rate=3.791041155209671E-4]:23.776950053431115)[&rate=2.627744817322942E-4]:31.728206424411916)[&rate=6.344454279354309E-4]:1.795517968211243,15[&rate=4.3858732067483444E-4]:0.0)[&rate=4.0086435539493046E-4]:16.019759883138917)[&rate=2.3510066857982472E-4]:5.571638113921253,2[&rate=3.055185141020201E-4]:21.59139799706017)[&rate=5.899568095333532E-4]:1.746357517888896,((3[&rate=3.791041155209671E-4]:23.822278825885398,13[&rate=2.970241461925909E-4]:1.3222788258854052)[&rate=2.3510066857982472E-4]:1.3777211741145976,18[&rate=4.6899893081314345E-4]:0.0)[&rate=4.866062903930552E-4]:3.037755514949069)[&rate=2.2495111419757702E-4]:7.516998543449674,20[&rate=4.866062903930552E-4]:96.85475405839874)[&rate=2.970241461925909E-4]:0.71486731485669,19[&rate=1.4067619195798402E-4]:97.56962137325543)[&rate=1.0]:0.0;
tree STATE_315000 = (((((((1[&rate=2.060301763846577E-4]:5.768809096811445,((4[&rate=2.4449757575709867E-4]:20.260742011444993,5[&rate=1.8382501262648735E-4]:20.260742011444993)[&rate=2.94479199943088E-4]:25.908910865801456,((6[&rate=3.741593631127956E-4]:7.772345128581642,7[&rate=3.302378380443911E-4]:7.772345128581642)[&rate=2.994619673103917E-4]:20.055251247214404,(((8[&rate=3.668251586189631E-4]:12.163252553157022,(9[&rate=2.7408297384067757E-4]:1.813196875611341,10[&rate=2.6871044871742077E-4]:1.813196875611341)[&rate=2.7408297384067757E-4]:10.350055677545681)[&rate=3.599608578061736E-4]:4.6508160375156535,12[&rate=4.5907181500841603E-4]:16.814068590672676)[&rate=2.94479199943088E-4]:2.9848124053865206,11[&rate=3.907284492264759E-4]:19.798880996059196)[&rate=3.741593631127956E-4]:8.028715379736848)[&rate=3.599608578061736E-4]:18.342056501450404)[&rate=4.1121279032127413E-4]:15.599156219564996)[&rate=4.0033312124513617E-4]:10.33119090318855,14[&rate=5.469360720684468E-4]:0.0)[&rate=1.8382501262648735E-4]:16.362284679383507,13[&rate=2.2889955171691544E-4]:4.862284679383507)[&rate=2.8442997721740373E-4]:0.3028865606553097,(2[&rate=3.3573722652283794E-4]:19.239473418877907,3[&rate=2.8947701691447596E-4]:24.139473418877905)[&rate=3.668251586189631E-4]:3.525697821160904)[&rate=2.060301763846577E-4]:1.4282524784324124,(((15[&rate=4.0033312124513617E-4]:8.111521386075282,17[&rate=2.7408297384067757E-4]:8.111521386075282)[&rate=2.2889955171691544E-4]:2.029793193660595,16[&rate=2.1900828381725093E-4]:10.141314579735877)[&rate=3.907284492264759E-4]:13.326426388084926,18[&rate=4.1121279032127413E-4]:3.167740967820805)[&rate=2.4449757575709867E-4]:0.7256827506504209)[&rate=2.8442997721740373E-4]:0.6686849680840936,20[&rate=4.2388100842389925E-4]:90.86210868655532)[&rate=3.534807805332545E-4]:5.952730745752191,19[&rate=1.8382501262648735E-4]:96.81483943230751)[&rate=1.0]:0.0;
tree STATE_330000 = (((((1[&rate=2.93660645188294E-4]:25.842749751476546,(2[&rate=4.853410501916173E-4]:8.374313624485808,3[&rate=2.1747699471639836E-4]:13.274313624485806)[&rate=3.277723870479326E-4]:7.468436126990738)[&rate=1.8259304434373725E-4]:9.61751684159806,13[&rate=2.8574598584455856E-4]:7.860266593074613)[&rate=3.685673145895409E-4]:2.1509917889910213,(((((((4[&rate=3.933750287247141E-4]:2.406195344837506,(8[&rate=2.2528094929353203E-4]:0.8717348354329613,11[&rate=2.0103888235308465E-4]:0.8717348354329613)[&rate=5.153062892937169E-4]:1.5344605094045447)[&rate=2.404442727054257E-4]:37.67114328342629,(5[&rate=1.4404319336349953E-4]:1.8046893477149204,12[&rate=3.1878294820661147E-4]:1.8046893477149204)[&rate=3.804787233210328E-4]:38.272649280548876)[&rate=3.933750287247141E-4]:12.622325075401925,((6[&rate=6.152314304490442E-4]:9.948225182606537,7[&rate=3.933750287247141E-4]:9.948225182606537)[&rate=3.804787233210328E-4]:18.23798588540339,(9[&rate=1.7197519560829968E-4]:4.0327404219078264,10[&rate=3.574642243269149E-4]:4.0327404219078264)[&rate=3.574642243269149E-4]:24.1534706461021)[&rate=1.7197519560829968E-4]:24.513452635655796)[&rate=1.7197519560829968E-4]:13.30033629633428,15[&rate=3.1013524000187315E-4]:0.0)[&rate=4.4080975213456894E-4]:1.3801607494938253,16[&rate=5.153062892937169E-4]:1.3801607494938253)[&rate=2.779944799369795E-4]:18.919839250506172,18[&rate=2.404442727054257E-4]:0.0)[&rate=2.5536460097463936E-4]:2.559892185075327,(14[&rate=3.685673145895409E-4]:10.84326052662027,17[&rate=1.7197519560829968E-4]:16.943260526620264)[&rate=2.404442727054257E-4]:5.91663165845506)[&rate=4.2314878189856926E-4]:4.751366196990304)[&rate=5.153062892937169E-4]:1.294456577200279,20[&rate=5.550958643646604E-4]:94.90571495926591)[&rate=3.1013524000187315E-4]:0.947488172949349,19[&rate=2.1747699471639836E-4]:95.85320313221526)[&rate=1.0]:0.0;
tree STATE_345000 = (((((1[&rate=4.2517477485565957E-4]:17.768527705455895,(((4[&rate=2.2101289172408704E-4]:46.65718203949534,((5[&rate=2.2890539530628706E-4]:6.583828359035139,12[&rate=1.1387070583805568E-4]:6.583828359035139)[&rate=1.1387070583805568E-4]:23.789872480530676,((6[&rate=3.035108555366649E-4]:5.9460378553348505,(7[&rate=3.8765888468395124E-4]:0.21798071637906222,8[&rate=1.2043807977539957E-4]:0.21798071637906222)[&rate=2.372550246589651E-4]:5.728057138955788)[&rate=3.8765888468395124E-4]:21.82679739578453,(9[&rate=2.556745134971572E-4]:4.193232452129995,(10[&rate=1.327868909038368E-4]:3.960201025523647,11[&rate=1.0687004925979885E-4]:3.960201025523647)[&rate=1.267121537177315E-4]:0.233031426606348)[&rate=3.598624165342174E-4]:23.579602798989388)[&rate=1.740102755172027E-4]:2.600865588446432)[&rate=3.8765888468395124E-4]:16.283481199929525)[&rate=9.92071011428421E-5]:19.52373872425906,16[&rate=2.659763450593875E-4]:0.18092076375440058)[&rate=2.4614399657023144E-4]:5.919079236245594,14[&rate=2.659763450593875E-4]:0.0)[&rate=4.8310940246345537E-4]:1.668527705455901)[&rate=3.1932188103199515E-4]:18.15304227521736,13[&rate=3.8765888468395124E-4]:8.32156998067326)[&rate=1.562439657990555E-4]:3.697284900563787,((((2[&rate=1.680105186262763E-4]:4.739253843368232,3[&rate=1.562439657990555E-4]:9.63925384336823)[&rate=4.8310940246345537E-4]:14.128688034839811,15[&rate=6.271616393586234E-5]:18.867941878208043)[&rate=1.6209778586161907E-4]:1.432058121791954,18[&rate=7.960622166667769E-5]:0.0)[&rate=1.562439657990555E-4]:5.504430057358405,17[&rate=2.2890539530628706E-4]:25.804430057358402)[&rate=3.035108555366649E-4]:3.814424823878639)[&rate=3.377384367534957E-4]:4.674080290717427,20[&rate=4.8310940246345537E-4]:100.29293517195447)[&rate=1.8638363758424628E-4]:3.2071762196647455,19[&rate=1.0687004925979885E-4]:103.50011139161921)[&rate=1.0]:0.0;
tree STATE_360000 = (((((1[&rate=4.329619536226934E-4]:20.077616740445123,16[&rate=3.1827758466522433E-4]:10.077616740445123)[&rate=3.286440620596542E-4]:25.016836068946404,(2[&rate=3.645179045899042E-4]:34.73617766629111,(((3[&rate=1.588493331133235E-4]:22.499999999999993,13[&rate=3.5160252047154245E-4]:0.0)[&rate=1.588493331133235E-4]:11.251376277184505,((14[&rate=2.2837135149087997E-4]:0.0,15[&rate=1.994016788860455E-4]:6.099999999999994)[&rate=2.503511376081853E-4]:21.295664824295983,18[&rate=1.7628620317364558E-4]:7.09566482429598)[&rate=3.9446721003654254E-4]:1.4557114528885222)[&rate=2.503511376081853E-4]:1.2988907809334194,(((4[&rate=4.329619536226934E-4]:1.6308296575096652,11[&rate=3.08494527065464E-4]:1.6308296575096652)[&rate=2.2837135149087997E-4]:22.141305382313977,(5[&rate=3.9446721003654254E-4]:5.6746665598985455,12[&rate=2.139662210758215E-4]:5.6746665598985455)[&rate=1.4887690909517692E-4]:18.097468479925098)[&rate=1.7628620317364558E-4]:39.88227181226951,((6[&rate=3.08494527065464E-4]:6.845081305514883,7[&rate=2.9033413969545215E-4]:6.845081305514883)[&rate=3.786946134912682E-4]:32.698201380830994,(8[&rate=9.983313359956223E-5]:8.864329793480657,(9[&rate=2.7360910176741797E-4]:2.759250176426315,10[&rate=1.91936931685262E-4]:2.759250176426315)[&rate=4.329619536226934E-4]:6.105079617054342)[&rate=2.503511376081853E-4]:30.67895289286522)[&rate=2.9033413969545215E-4]:24.11112416574727)[&rate=2.067262830248488E-4]:32.49586020602477)[&rate=2.7360910176741797E-4]:4.585910608173194)[&rate=4.1231520590215195E-4]:0.3582751431004141)[&rate=5.914571876731021E-4]:6.358320705931774,17[&rate=2.2837135149087997E-4]:41.4527735153233)[&rate=1.91936931685262E-4]:1.3559836399388132,20[&rate=5.291506006180889E-4]:108.80875715526211)[&rate=2.8182007358109457E-4]:0.4355435076804781,19[&rate=1.7628620317364558E-4]:109.24430066294259)[&rate=1.0]:0.0;
tree STATE_375000 = (((((1[&rate=1.8654095116510763E-4]:10.0,17[&rate=5.557424183752469E-4]:0.0)[&rate=1.3860083376635677E-4]:22.10552430566058,((3[&rate=4.56098620888272E-4]:22.49492806453312,((14[&rate=3.63655916558773E-4]:0.0,16[&rate=8.867590067303799E-4]:6.099999999999994)[&rate=2.922982024391384E-4]:8.857305580340437,15[&rate=1.7784940606781864E-4]:14.957305580340432)[&rate=8.686279131254492E-5]:2.63762248419269)[&rate=2.285784180525809E-4]:2.7050719354668757,18[&rate=3.7859150969476E-4]:0.0)[&rate=3.63655916558773E-4]:1.8055243056605832)[&rate=1.7784940606781864E-4]:4.84089519014762,(2[&rate=3.02649878077483E-4]:21.50337443996432,(((4[&rate=2.545065044646102E-4]:15.478156976391695,((5[&rate=1.3860083376635677E-4]:2.888722342714021,12[&rate=2.6351979554913247E-4]:2.888722342714021)[&rate=2.545065044646102E-4]:3.6432925823346745,8[&rate=3.63655916558773E-4]:6.532014925048696)[&rate=1.8654095116510763E-4]:8.946142051343)[&rate=1.9505159433961101E-4]:50.589533739195296,((6[&rate=5.15167941565988E-4]:2.863827159390838,7[&rate=1.5950268874752427E-4]:2.863827159390838)[&rate=6.105910690128403E-4]:19.3273964429618,(9[&rate=3.134899080176567E-4]:3.8762062631755887,(10[&rate=4.129193191363356E-4]:0.6278283202060565,11[&rate=1.6888093718882218E-4]:0.6278283202060565)[&rate=3.4984870470587643E-4]:3.2483779429695323)[&rate=6.105910690128403E-4]:18.315017339177047)[&rate=1.8654095116510763E-4]:43.876467113234355)[&rate=3.4984870470587643E-4]:17.532309284413003,13[&rate=3.4984870470587643E-4]:0.0)[&rate=2.370767933559412E-4]:3.903374439964324)[&rate=8.867590067303799E-4]:5.443045055843882)[&rate=1.8654095116510763E-4]:5.849909709230545,20[&rate=4.8291576242996865E-4]:98.79632920503875)[&rate=3.9490250160184506E-4]:1.752703771129191,19[&rate=1.8654095116510763E-4]:100.54903297616794)[&rate=1.0]:0.0;
tree STATE_390000 = ((((1[&rate=1.4863904852216843E-4]:42.628223777782466,(13[&rate=0.0010597981939446093]:8.77723502985043,18[&rate=2.1339197945869634E-4]:6.077235029850428)[&rate=1.4863904852216843E-4]:6.250988747932041)[&rate=1.7246299597927512E-4]:11.176898010746257,((((2[&rate=7.140168526234204E-4]:5.009356040941896,16[&rate=4.3053846917262567E-4]:5.009356040941896)[&rate=2.0355032031269343E-4]:1.0906439590580987,14[&rate=1.9352650013445725E-4]:0.0)[&rate=6.463168486855261E-4]:23.391295733199996,(3[&rate=3.397081947016237E-4]:11.162716329610866,17[&rate=3.525990954217499E-4]:6.262716329610868)[&rate=3.0434114486802683E-4]:23.228579403589123)[&rate=6.463168486855261E-4]:2.443838100083994,((((4[&rate=1.1723099481039087E-4]:1.26316514047595,11[&rate=3.9602238689099466E-4]:1.26316514047595)[&rate=1.4863904852216843E-4]:25.435925425517862,(5[&rate=4.5019462154179807E-4]:2.410909994469093,12[&rate=3.397081947016237E-4]:2.410909994469093)[&rate=2.2313434991553388E-4]:24.28818057152472)[&rate=6.463168486855261E-4]:14.776915923581612,((6[&rate=4.7196153405646156E-4]:4.651262355743543,7[&rate=1.1723099481039087E-4]:4.651262355743543)[&rate=0.0010597981939446093]:9.331113695270254,((8[&rate=4.5019462154179807E-4]:0.25978797756658284,10[&rate=4.7196153405646156E-4]:0.25978797756658284)[&rate=3.6619660205289886E-4]:3.5024495717730697,9[&rate=3.806217115127642E-4]:3.7622375493396527)[&rate=6.463168486855261E-4]:10.220138501674146)[&rate=3.1565867137064703E-4]:27.493630438561627)[&rate=1.3454573387097651E-4]:25.713307062975872,15[&rate=5.570349795153009E-4]:1.1893135525512974)[&rate=2.2313434991553388E-4]:30.745820280732687)[&rate=2.0355032031269343E-4]:11.869987955244738)[&rate=2.2313434991553388E-4]:3.4461918160911154,20[&rate=4.5019462154179807E-4]:113.25131360461984)[&rate=3.525990954217499E-4]:1.6558554813105673,19[&rate=1.7246299597927512E-4]:114.9071690859304)[&rate=1.0]:0.0;
tree STATE_405000 = (((((1[&rate=2.0952849296258433E-4]:14.1239951227588,(15[&rate=2.63984732199446E-4]:3.1721641670653327,16[&rate=3.2029556489993294E-4]:3.1721641670653327)[&rate=4.6520567462810815E-4]:0.9518309556934668)[&rate=2.9691417105914575E-4]:34.554795688288834,17[&rate=4.6520567462810815E-4]:38.678790811047634)[&rate=6.606069319690739E-4]:2.2457597462335457,((((2[&rate=5.680979879163683E-4]:17.599999999999994,13[&rate=1.6301805222569387E-4]:0.0)[&rate=6.052284674757265E-4]:4.741066686920121,(4[&rate=3.0474636594879535E-4]:45.029043339722506,(((5[&rate=4.0576602548926614E-4]:8.241627265196206,(6[&rate=4.5145251673480157E-4]:3.2135111350306502,(7[&rate=3.3595054701356206E-4]:0.7708086592498058,11[&rate=3.6026348829460385E-4]:0.7708086592498058)[&rate=4.271019070456632E-4]:2.4427024757808447)[&rate=3.5199961363984513E-4]:5.0281161301655555)[&rate=2.232231259141724E-4]:12.194958761655004,(8[&rate=4.0576602548926614E-4]:7.706695477714477,12[&rate=3.9592371105064275E-4]:7.706695477714477)[&rate=3.7747403543630513E-4]:12.729890549136734)[&rate=2.8089910674423697E-4]:8.062325397816139,(9[&rate=6.606069319690739E-4]:1.8877598468106975,10[&rate=2.232231259141724E-4]:1.8877598468106975)[&rate=3.7747403543630513E-4]:26.61115157785665)[&rate=2.5495470111315554E-4]:16.530131915055158)[&rate=1.6301805222569387E-4]:43.31202334719761)[&rate=2.0952849296258433E-4]:7.894831157234677,3[&rate=3.3595054701356206E-4]:35.13589784415479)[&rate=3.9592371105064275E-4]:1.443306739607479,(14[&rate=3.7747403543630513E-4]:14.200000000000003,18[&rate=5.680979879163683E-4]:0.0)[&rate=5.398538958882208E-4]:11.379204583762274)[&rate=2.8089910674423697E-4]:9.245345973518909)[&rate=4.0576602548926614E-4]:0.4570599838828997,20[&rate=4.8037857201693713E-4]:107.38161054116408)[&rate=3.439078728300445E-4]:1.5849098930574854,19[&rate=2.232231259141724E-4]:108.96652043422156)[&rate=1.0]:0.0;
tree STATE_420000 = (((((((((1[&rate=1.1615077939734785E-4]:10.0,15[&rate=4.2776762243288877E-4]:0.0)[&rate=5.201541597970146E-4]:6.38265026737659,((4[&rate=4.6187836523090524E-4]:6.939270646425531,8[&rate=2.117637625251148E-4]:6.939270646425531)[&rate=2.4229350110098526E-4]:41.50718536267419,((((5[&rate=1.9473357081855312E-4]:5.237288535514564,12[&rate=2.7046352026515526E-4]:5.237288535514564)[&rate=3.112613335807163E-4]:20.61914462132186,(9[&rate=1.1615077939734785E-4]:7.267188938315733,10[&rate=4.6187836523090524E-4]:7.267188938315733)[&rate=3.112613335807163E-4]:18.58924421852069)[&rate=2.565623284590547E-4]:13.727249503738221,(6[&rate=5.201541597970146E-4]:4.740440885366284,7[&rate=3.248743779529132E-4]:4.740440885366284)[&rate=3.248743779529132E-4]:34.84324177520836)[&rate=0.0015164386374985198]:3.823050752647738,11[&rate=3.525716052404135E-4]:43.40673341322238)[&rate=4.1175516896756E-4]:5.039722595877343)[&rate=1.519577335461158E-4]:23.936194258276863)[&rate=0.0010037166488682235]:2.283976977543773,16[&rate=1.519577335461158E-4]:8.666627244920363)[&rate=1.9473357081855312E-4]:1.153054464539025,(14[&rate=1.519577335461158E-4]:1.5942010268444875,17[&rate=8.317548175071556E-4]:7.694201026844482)[&rate=2.8414203787063217E-4]:2.1254806826149064)[&rate=4.995737802923784E-4]:9.031810446772127,3[&rate=2.9771049172490994E-4]:23.751492156231514)[&rate=2.117637625251148E-4]:1.938955859970605,18[&rate=7.743637422168898E-4]:0.49044801620212297)[&rate=1.519577335461158E-4]:9.153515218633558,(2[&rate=9.044949410280328E-4]:17.599999999999994,13[&rate=2.9771049172490994E-4]:0.0)[&rate=3.9630908746307895E-4]:12.343963234835684)[&rate=4.2776762243288877E-4]:8.355849257400251,20[&rate=5.658766786978056E-4]:104.29981249223593)[&rate=2.7046352026515526E-4]:0.6055797583648683,19[&rate=2.565623284590547E-4]:104.9053922506008)[&rate=1.0]:0.0;
tree STATE_435000 = ((((((1[&rate=2.1167770123610611E-4]:10.0,16[&rate=5.328878523884328E-4]:0.0)[&rate=2.2081441246854888E-4]:6.099999999999994,14[&rate=3.582692500724467E-4]:0.0)[&rate=2.294290239544251E-4]:18.310354538343375,(15[&rate=3.229509479436445E-4]:21.250989066991153,18[&rate=3.0686629658735313E-4]:0.9509890669911556)[&rate=2.762205273171748E-4]:3.159365471352217)[&rate=5.328878523884328E-4]:7.956298256119439,((2[&rate=2.9138431446852636E-4]:0.0,(4[&rate=2.762205273171748E-4]:39.36036323024224,((5[&rate=3.229509479436445E-4]:27.10075498597368,(9[&rate=3.489196036959525E-4]:1.3260623291257354,10[&rate=2.3767030340028796E-4]:1.3260623291257354)[&rate=4.277762012039903E-4]:25.774692656847943)[&rate=4.277762012039903E-4]:4.212840295683456,((6[&rate=2.610862460061532E-4]:10.836513825213792,((7[&rate=2.2081441246854888E-4]:2.2950793523423356,8[&rate=3.7841991199018515E-4]:2.2950793523423356)[&rate=1.3503920877935984E-4]:0.23616259302401632,11[&rate=7.528902194154049E-4]:2.531241945366352)[&rate=2.83780144422152E-4]:8.30527187984744)[&rate=3.894104001371978E-4]:18.947602687484828,12[&rate=5.038294134304525E-4]:29.78411651269862)[&rate=3.0686629658735313E-4]:1.5294787689585156)[&rate=5.713073917612925E-4]:8.046767948585106)[&rate=3.229509479436445E-4]:26.639636769757757)[&rate=2.3767030340028796E-4]:27.255514096347255,((3[&rate=6.290422909937068E-4]:12.625317011249471,17[&rate=2.5342823642817347E-4]:7.725317011249473)[&rate=1.6162617519239613E-4]:18.02751636718692,13[&rate=3.7841991199018515E-4]:8.152833378436398)[&rate=3.489196036959525E-4]:1.502680717910863)[&rate=3.489196036959525E-4]:5.111138698115553)[&rate=2.686690005102373E-4]:3.2282641605946623,20[&rate=5.038294134304525E-4]:101.59491695505747)[&rate=2.1167770123610611E-4]:4.134613417617857,19[&rate=1.779597130961948E-4]:105.72953037267533)[&rate=1.0]:0.0;
tree STATE_450000 = ((((1[&rate=7.662683207575935E-4]:24.739790739122995,((((2[&rate=1.474750131505227E-4]:3.906139433517069,3[&rate=2.618105480111826E-4]:8.806139433517068)[&rate=1.8705044401715073E-4]:1.8408982275784354,15[&rate=1.6349214172049713E-4]:5.747037661095504)[&rate=5.701761884607916E-4]:0.35296233890449,14[&rate=3.4590770397871295E-4]:0.0)[&rate=4.0372584868806667E-4]:8.199939430533675,((4[&rate=4.3435958814619157E-4]:25.57865238435125,(((6[&rate=3.3624877793509767E-4]:6.858631305542279,7[&rate=1.8705044401715073E-4]:6.858631305542279)[&rate=5.292105457878739E-4]:0.16526575515521902,8[&rate=2.3089759179999712E-4]:7.023897060697498)[&rate=5.292105457878739E-4]:12.617237905877639,((9[&rate=4.983646347342394E-4]:1.9815267685304014,10[&rate=2.3874307762505894E-4]:1.9815267685304014)[&rate=2.618105480111826E-4]:3.70433198176109,11[&rate=2.464777476938113E-4]:5.685858750291492)[&rate=7.662683207575935E-4]:13.955276216283647)[&rate=5.701761884607916E-4]:5.937517417776114)[&rate=3.7820585055526777E-4]:9.652091983642556,(5[&rate=4.7348442762698475E-4]:3.0884254367674067,12[&rate=2.1461325766362492E-4]:3.0884254367674067)[&rate=4.0372584868806667E-4]:32.1423189312264)[&rate=2.0599446310010314E-4]:45.06919506253986)[&rate=3.5605641910769375E-4]:0.43985130858932564)[&rate=3.4590770397871295E-4]:14.335098453373817,((13[&rate=5.292105457878739E-4]:7.909138255033966,(17[&rate=3.2700489719824803E-4]:20.299999999999997,18[&rate=1.2165363448318017E-4]:0.0)[&rate=1.474750131505227E-4]:5.209138255033963)[&rate=3.7820585055526777E-4]:2.024768632239926,16[&rate=7.662683207575935E-4]:27.533906887273886)[&rate=2.618105480111826E-4]:1.5409823052229257)[&rate=1.2165363448318017E-4]:10.088709085359966,20[&rate=4.7348442762698475E-4]:105.16359827785678)[&rate=2.850701228274573E-4]:2.3214110622540716,19[&rate=1.474750131505227E-4]:107.48500934011085)[&rate=1.0]:0.0;
tree STATE_465000 = ((((((((1[&rate=7.504569244109228E-4]:10.0,15[&rate=2.1239089035616644E-4]:0.0)[&rate=3.9900193845112325E-4]:13.703192501547719,(((4[&rate=2.4208396147765328E-4]:31.063583026404576,11[&rate=2.4208396147765328E-4]:31.063583026404576)[&rate=3.0008166528156915E-4]:21.862873394866096,(((5[&rate=2.345733040178105E-4]:0.8967117031569619,12[&rate=6.05758481827939E-4]:0.8967117031569619)[&rate=1.9750474781119186E-4]:22.79139506652352,((6[&rate=2.9091551026817953E-4]:0.06422245915655547,8[&rate=3.4203424721442765E-4]:0.06422245915655547)[&rate=2.0498705232812234E-4]:5.020886036984428,7[&rate=1.5624142862744273E-4]:5.085108496140983)[&rate=2.8212593347907126E-4]:18.6029982735395)[&rate=1.7394852823973675E-4]:6.9755792176705,(9[&rate=2.0498705232812234E-4]:1.5039234154356778,10[&rate=5.400924908224367E-4]:1.5039234154356778)[&rate=3.9900193845112325E-4]:29.159762571915305)[&rate=2.497115338787056E-4]:22.262770433919687)[&rate=2.4208396147765328E-4]:19.173543578729323,14[&rate=3.4203424721442765E-4]:0.0)[&rate=1.7394852823973675E-4]:7.603192501547724)[&rate=2.345733040178105E-4]:4.750038099064497,(16[&rate=3.67813731584922E-4]:16.969570962107312,17[&rate=3.54388033161679E-4]:16.969570962107312)[&rate=5.400924908224367E-4]:1.4836596385049035)[&rate=1.5624142862744273E-4]:0.5455519055067555,13[&rate=2.4208396147765328E-4]:1.3987825061189767)[&rate=2.4208396147765328E-4]:5.58779255291924,(2[&rate=2.8212593347907126E-4]:1.5365136374303319,3[&rate=1.898879820939698E-4]:6.4365136374303304)[&rate=4.176232994512825E-4]:23.05006142160788)[&rate=3.198177953080489E-4]:1.6992840879103852,18[&rate=2.1239089035616644E-4]:5.985859146948599)[&rate=2.497115338787056E-4]:9.061623251647958,20[&rate=4.6495323894787954E-4]:101.34748239859655)[&rate=9.680097009591414E-5]:0.42754127373781614,19[&rate=1.898879820939698E-4]:101.77502367233437)[&rate=1.0]:0.0;
tree STATE_480000 = (((((1[&rate=2.3317258443866562E-4]:26.829738631721014,(14[&rate=1.846045028755195E-4]:0.0,17[&rate=5.219767193501724E-4]:6.099999999999994)[&rate=1.045143520218347E-4]:10.72973863172102)[&rate=9.143980386178452E-4]:7.254722170408243,(2[&rate=3.5236845618021967E-4]:21.92484604139419,((3[&rate=2.1562176741502293E-4]:22.88103223887763,(((4[&rate=2.73497854247429E-4]:44.48869283932587,((5[&rate=4.2412334307794067E-4]:0.23523664579682388,12[&rate=0.0011299199376188225]:0.23523664579682388)[&rate=1.3465392981581732E-4]:23.553885424614588,(((6[&rate=2.1562176741502293E-4]:1.011427776663947,8[&rate=1.7079704573483642E-4]:1.011427776663947)[&rate=1.045143520218347E-4]:9.910083761848986,(7[&rate=2.73497854247429E-4]:8.896686669246103,11[&rate=5.219767193501724E-4]:8.896686669246103)[&rate=1.4592552172489677E-4]:2.02482486926683)[&rate=0.0011299199376188225]:6.280641500140591,(9[&rate=7.854436966492615E-5]:6.293483373600419,10[&rate=2.3317258443866562E-4]:6.293483373600419)[&rate=9.143980386178452E-4]:10.908669665053104)[&rate=2.9689405595591896E-4]:6.586969031757889)[&rate=1.7079704573483642E-4]:20.69957076891446)[&rate=3.229970755529955E-4]:31.895527293381427,15[&rate=2.9689405595591896E-4]:10.384220132707298)[&rate=1.5794121319737375E-4]:1.8746440407849292,16[&rate=1.846045028755195E-4]:12.258864173492228)[&rate=3.2593071105745584E-5]:5.722168065385404)[&rate=2.432324743578579E-5]:2.318967761122366,18[&rate=5.219767193501724E-4]:0.0)[&rate=1.045143520218347E-4]:1.6248460413941928)[&rate=7.854436966492615E-5]:2.1596147607350673)[&rate=1.4084504847410558E-5]:3.732127052610565,13[&rate=2.3317258443866562E-4]:10.216587854739828)[&rate=3.2593071105745584E-5]:0.7648827015866573,20[&rate=6.667621078335544E-4]:94.58147055632648)[&rate=1.9949438013136168E-4]:1.9645115874785688,19[&rate=1.846045028755195E-4]:96.54598214380505)[&rate=1.0]:0.0;
tree STATE_495000 = (((((((1[&rate=1.631167229407363E-4]:10.304697691345595,(((4[&rate=2.0135410898277473E-4]:5.13632897381502,8[&rate=2.083529972448914E-4]:5.13632897381502)[&rate=3.5341817080409416E-4]:43.10690008878142,((5[&rate=2.4805540226822904E-4]:1.5068601146305347,12[&rate=2.6063197273302845E-4]:1.5068601146305347)[&rate=2.908811074559989E-4]:31.308648023402824,((6[&rate=2.2530225504532864E-4]:5.5704339014832005,(7[&rate=1.92991050834339E-4]:3.458975747507567,11[&rate=3.2933532248066835E-4]:3.458975747507567)[&rate=3.4443379870140775E-4]:2.1114581539756334)[&rate=3.005099347315466E-4]:24.359343945388048,(9[&rate=3.2277939772453986E-4]:4.060195709267477,10[&rate=2.774903768660097E-4]:4.060195709267477)[&rate=3.6386765666690627E-4]:25.86958213760377)[&rate=2.083529972448914E-4]:2.8857302911621083)[&rate=2.145133531038771E-4]:15.427720924563083)[&rate=2.145133531038771E-4]:17.75677093740356,15[&rate=2.3938328755726204E-4]:0.0)[&rate=1.631167229407363E-4]:0.304697691345595)[&rate=2.689848918750641E-4]:5.448968620513483,3[&rate=2.3938328755726204E-4]:10.653666311859077)[&rate=2.956061569448559E-4]:3.8543441778441974,(16[&rate=2.4376547988385662E-4]:1.2613255582230636,17[&rate=3.6386765666690627E-4]:1.2613255582230636)[&rate=3.765153701110247E-4]:8.346684931480212)[&rate=2.956061569448559E-4]:2.011701420990022,2[&rate=2.4376547988385662E-4]:11.619711910693297)[&rate=3.2933532248066835E-4]:11.614818705984746,((13[&rate=4.647770964266454E-4]:3.5700572845873637,18[&rate=3.5341817080409416E-4]:0.8700572845873609)[&rate=2.2010881961310598E-4]:1.3860000594447541,14[&rate=2.86303989371945E-4]:16.456057344032118)[&rate=1.631167229407363E-4]:0.678473272645931)[&rate=3.5341817080409416E-4]:6.554747616070927,20[&rate=4.647770964266454E-4]:95.78927823274897)[&rate=3.1670095953916617E-4]:4.475501432748402,19[&rate=1.81995201229866E-4]:100.26477966549737)[&rate=1.0]:0.0;
tree STATE_510000 = (((((((1[&rate=3.7423934240816894E-4]:30.299999999999997,18[&rate=2.810323658140196E-4]:0.0)[&rate=2.3568827404270645E-4]:2.703360788435319,(((4[&rate=2.4127472235881155E-4]:4.14413702125591,11[&rate=1.6578213438067155E-4]:4.14413702125591)[&rate=2.3568827404270645E-4]:59.50875448731181,((((5[&rate=2.810323658140196E-4]:2.509525722236963,8[&rate=2.0853170114122844E-4]:2.509525722236963)[&rate=2.568035893619302E-4]:5.087049710521544,7[&rate=2.0853170114122844E-4]:7.596575432758507)[&rate=2.2977613116288205E-4]:1.5528064772316847,6[&rate=3.8488571519042003E-4]:9.149381909990192)[&rate=3.2854873682701944E-4]:21.901036023290658,((9[&rate=2.568035893619302E-4]:5.907440915911207,10[&rate=3.7423934240816894E-4]:5.907440915911207)[&rate=2.6659113000035314E-4]:6.817614614999925,12[&rate=3.3485228318322677E-4]:12.725055530911131)[&rate=3.48682180316699E-4]:18.325362402369716)[&rate=2.858756046087417E-4]:32.60247357528687)[&rate=3.41535296891089E-4]:9.826021397243068,15[&rate=3.8488571519042003E-4]:7.4789129058107875)[&rate=2.9573667335411916E-4]:15.524447882624528)[&rate=3.225586246150659E-4]:0.9858851368200874,(14[&rate=2.9573667335411916E-4]:17.431239492397296,16[&rate=3.8488571519042003E-4]:23.53123949239729)[&rate=3.972986497528806E-4]:0.45800643285811304)[&rate=2.1643987031160725E-4]:5.398275721205366,17[&rate=1.6578213438067155E-4]:29.38752164646077)[&rate=3.225586246150659E-4]:4.788547781181279,((2[&rate=3.1131611336474827E-4]:17.599999999999994,13[&rate=1.991143643957178E-4]:0.0)[&rate=2.907697150042769E-4]:15.23159484287055,3[&rate=2.858756046087417E-4]:37.73159484287054)[&rate=4.1236544734871004E-4]:1.344474584771504)[&rate=2.0853170114122844E-4]:5.53892939224383,20[&rate=4.603683392413216E-4]:105.71499881988588)[&rate=1.6578213438067155E-4]:0.6902830357834375,19[&rate=2.0853170114122844E-4]:106.40528185566932)[&rate=1.0]:0.0;
tree STATE_525000 = ((((1[&rate=5.572496129126943E-4]:22.506066889445265,((((4[&rate=2.163407453141686E-4]:60.28681591821714,(((5[&rate=5.199447112338699E-4]:1.7737079407911505,12[&rate=2.163407453141686E-4]:1.7737079407911505)[&rate=3.2398809300291856E-4]:21.812916236260673,(6[&rate=3.2398809300291856E-4]:3.2677588512851634,7[&rate=3.9195353599335306E-4]:3.2677588512851634)[&rate=3.001868161229371E-4]:20.318865325766662)[&rate=2.555963204830729E-4]:2.242402550280403,((8[&rate=1.585829322695141E-4]:7.478262803608455,11[&rate=4.1781522855254574E-4]:7.478262803608455)[&rate=7.334169829837603E-4]:3.091276832030422,(9[&rate=2.6298441270817955E-4]:2.507627186846666,10[&rate=1.8705249231113394E-4]:2.507627186846666)[&rate=2.7034110952883745E-4]:8.061912448792212)[&rate=6.132876515046303E-4]:15.25948709169335)[&rate=1.8705249231113394E-4]:34.45778919088491)[&rate=3.2398809300291856E-4]:7.48426927520881,16[&rate=3.1584587547001146E-4]:1.7710851934259466)[&rate=5.199447112338699E-4]:0.43253253050262686,17[&rate=4.043157069670524E-4]:2.2036177239285735)[&rate=1.326079929382296E-4]:5.049416636313779,15[&rate=1.585829322695141E-4]:7.253034360242353)[&rate=2.481338862112919E-4]:5.253032529202912)[&rate=3.8050999293133054E-4]:9.817058110088695,((((2[&rate=4.495544931171068E-4]:6.397706058950817,3[&rate=2.555963204830729E-4]:11.297706058950816)[&rate=1.326079929382296E-4]:13.90229394104918,18[&rate=1.7453032150517743E-4]:0.0)[&rate=2.7034110952883745E-4]:0.22743645825535452,14[&rate=3.5021711232338643E-4]:14.427436458255357)[&rate=3.8050999293133054E-4]:0.4372980801272064,13[&rate=2.9259357154490023E-4]:3.3647345383825638)[&rate=5.572496129126943E-4]:1.3583904611514015)[&rate=3.8050999293133054E-4]:0.5677137601482372,20[&rate=6.132876515046303E-4]:88.8908387596822)[&rate=2.7034110952883745E-4]:6.724907235489923,19[&rate=1.7453032150517743E-4]:95.61574599517212)[&rate=1.0]:0.0;
tree STATE_540000 = (((((((((1[&rate=4.474580654874383E-4]:10.0,16[&rate=0.0011277512392945084]:0.0)[&rate=3.453737792533472E-4]:0.8510153291304476,15[&rate=1.8015869023742253E-4]:0.8510153291304476)[&rate=1.2080581505112034E-4]:10.128544425538507,2[&rate=3.662345550043739E-4]:10.979559754668955)[&rate=2.5299067819694557E-4]:11.357480980321185,17[&rate=3.896708435277704E-4]:22.33704073499014)[&rate=1.0383545397519288E-4]:1.334505932314741,14[&rate=1.0383545397519288E-4]:17.571546667304887)[&rate=6.712725924226309E-4]:15.449353039450841,3[&rate=5.889324204473587E-4]:44.02089970675572)[&rate=5.300152650757441E-4]:4.056211175417943,(((4[&rate=1.8015869023742253E-4]:5.045318920465404,8[&rate=2.792165609804979E-4]:5.045318920465404)[&rate=1.9883455895431973E-4]:38.87494269458842,((5[&rate=5.889324204473587E-4]:3.1767127714559464,12[&rate=5.300152650757441E-4]:3.1767127714559464)[&rate=9.490913419570111E-5]:15.72743325112107,(((6[&rate=0.0011277512392945084]:1.2021266606362306,11[&rate=4.4604952019660136E-5]:1.2021266606362306)[&rate=1.0383545397519288E-4]:1.2168744062827515,7[&rate=1.0383545397519288E-4]:2.419001066918982)[&rate=4.163979184077978E-4]:13.52698207923402,(9[&rate=4.163979184077978E-4]:2.9346858090639274,10[&rate=1.2909174693040377E-4]:2.9346858090639274)[&rate=0.0011277512392945084]:13.011297337089076)[&rate=3.453737792533472E-4]:2.958162876424014)[&rate=2.086921977531725E-4]:25.016115592476808)[&rate=1.2080581505112034E-4]:46.49683824691191,(13[&rate=5.300152650757441E-4]:2.700000000000003,18[&rate=2.1896903067785778E-4]:0.0)[&rate=2.656766693400683E-4]:4.117099861965741)[&rate=3.662345550043739E-4]:18.760011020207926)[&rate=1.0383545397519288E-4]:6.17397773946017,20[&rate=4.163979184077978E-4]:115.35108862163383)[&rate=1.712429719640969E-4]:8.565916583876572,19[&rate=1.1242012112139725E-4]:123.9170052055104)[&rate=1.0]:0.0;
tree STATE_555000 = ((((((1[&rate=2.1142472698599648E-4]:29.299286473331122,(((4[&rate=1.7918257474436617E-4]:26.120587362576785,(5[&rate=3.170123028360172E-4]:1.395294839327273,12[&rate=1.2943898124938101E-4]:1.395294839327273)[&rate=2.964181550526369E-4]:24.72529252324951)[&rate=2.4332929176995854E-4]:23.15662622178752,((6[&rate=5.269888102004114E-4]:5.001466854494728,(7[&rate=5.761086358107936E-4]:0.7006220769651804,8[&rate=5.761086358107936E-4]:0.7006220769651804)[&rate=9.091348794607001E-5]:4.300844777529548)[&rate=3.2816087637998744E-4]:25.153689621187155,((9[&rate=3.170123028360172E-4]:7.783179913914675,10[&rate=2.1931693016256324E-4]:7.783179913914675)[&rate=2.775732320904429E-4]:3.8904556450229864,11[&rate=3.2816087637998744E-4]:11.673635558937661)[&rate=5.761086358107936E-4]:18.48152091674422)[&rate=2.4332929176995854E-4]:19.122057108682423)[&rate=2.775732320904429E-4]:16.722786415635696,15[&rate=2.868099744284082E-4]:0.0)[&rate=3.064609047513216E-4]:19.299286473331122)[&rate=2.868099744284082E-4]:12.329319599953337,((2[&rate=2.2723889493143573E-4]:9.83743243701933,3[&rate=1.5203437646497825E-4]:14.73743243701933)[&rate=1.8746298084312864E-4]:10.736084662702908,13[&rate=2.0351911065448787E-4]:2.973517099722244)[&rate=1.4150379185463318E-4]:11.05508897356222)[&rate=3.064609047513216E-4]:0.36862075386036963,(14[&rate=1.4150379185463318E-4]:0.0,(16[&rate=8.202403910908727E-4]:4.333134928744855,17[&rate=2.868099744284082E-4]:4.333134928744855)[&rate=2.964181550526369E-4]:1.7668650712551397)[&rate=1.2943898124938101E-4]:25.897226827144834)[&rate=2.1142472698599648E-4]:9.716426750861032,18[&rate=1.9555117091181213E-4]:21.413653578005864)[&rate=1.5203437646497825E-4]:8.227182446023718,20[&rate=4.1617280594783107E-4]:115.94083602402958)[&rate=5.761086358107936E-4]:0.8210460848018499,19[&rate=1.5203437646497825E-4]:116.76188210883143)[&rate=1.0]:0.0;
tree STATE_570000 = (((((1[&rate=2.6469426987483E-5]:52.44750895121193,2[&rate=1.0760144529393961E-4]:42.44750895121193)[&rate=2.6469426987483E-5]:5.248360025827438,((3[&rate=2.596661277738703E-4]:43.3152736903071,(((((4[&rate=1.565842175777374E-4]:30.078636105740816,(5[&rate=3.8182802252572155E-5]:7.503615454787998,12[&rate=1.1385723208825636E-4]:7.503615454787998)[&rate=1.1385723208825636E-4]:22.57502065095282)[&rate=2.777352998762101E-4]:12.664013794026115,((6[&rate=1.565842175777374E-4]:13.22368632398641,7[&rate=1.410960537719035E-4]:13.22368632398641)[&rate=5.009550392919136E-4]:13.381701521287482,((8[&rate=1.9348071927463453E-4]:2.5537681051081798,(9[&rate=2.596661277738703E-4]:2.0907097620710493,11[&rate=1.6496401237586574E-4]:2.0907097620710493)[&rate=2.596661277738703E-4]:0.46305834303713045)[&rate=1.7385210310416475E-4]:1.974063346491242,10[&rate=7.798784560852421E-5]:4.527831451599422)[&rate=4.346713563158421E-4]:22.07755639367447)[&rate=3.877165019216255E-4]:16.13726205449304)[&rate=1.0150091291699829E-4]:24.44716521674495,16[&rate=1.1385723208825636E-4]:1.1898151165118804)[&rate=2.293158799433431E-4]:19.110184883488117,18[&rate=7.213433230954045E-5]:0.0)[&rate=1.4864698065153776E-4]:17.3940926482192,(14[&rate=8.380559176665116E-5]:0.0,15[&rate=9.552383988347485E-5]:6.099999999999994)[&rate=1.2030021000477839E-4]:31.594092648219203)[&rate=1.1385723208825636E-4]:0.7211810420879061)[&rate=1.0150091291699829E-4]:7.944223151168572,17[&rate=1.2696353572875035E-4]:46.359496841475675)[&rate=2.596661277738703E-4]:1.3363721355636926)[&rate=7.798784560852421E-5]:16.355555113988373,13[&rate=2.044294484743131E-4]:46.45142409102775)[&rate=3.2267258066150654E-4]:2.695494327590893,20[&rate=3.5170349192896206E-4]:132.74691841861863)[&rate=2.777352998762101E-4]:0.2650463994407062,19[&rate=1.2696353572875035E-4]:133.01196481805934)[&rate=1.0]:0.0;
tree STATE_585000 = ((((((((((1[&rate=2.3099047780231392E-4]:10.0,16[&rate=2.1770321415381987E-4]:0.0)[&rate=3.266824548542127E-4]:8.321652058769104,15[&rate=3.7126129596031367E-4]:8.321652058769104)[&rate=1.841731433041796E-4]:1.7273358633186717,(14[&rate=2.0925735292696827E-4]:0.0,17[&rate=2.757700594286297E-4]:6.099999999999994)[&rate=1.9681878430692032E-4]:3.948987922087781)[&rate=1.7057258301275726E-4]:0.4213913326020844,(4[&rate=1.6030276239287688E-4]:68.6184172091814,((5[&rate=1.841731433041796E-4]:15.440653328898096,(9[&rate=1.926564804282003E-4]:3.4128580715781345,10[&rate=3.1285817470913535E-4]:3.4128580715781345)[&rate=1.926564804282003E-4]:12.027795257319962)[&rate=1.7527811407952164E-4]:23.972294251383637,(((6[&rate=1.7527811407952164E-4]:2.579971407082242,8[&rate=2.9186509000547886E-4]:2.579971407082242)[&rate=2.0925735292696827E-4]:9.381012323621139,(7[&rate=2.508945239153893E-4]:5.799438915006445,11[&rate=2.0925735292696827E-4]:5.799438915006445)[&rate=1.479615915027294E-4]:6.161544815696936)[&rate=3.0153227065284614E-4]:4.859314430859209,12[&rate=1.7527811407952164E-4]:16.82029816156259)[&rate=3.0153227065284614E-4]:22.59264941871914)[&rate=2.6245116453496993E-4]:29.20546962889967)[&rate=1.9681878430692032E-4]:7.851962045508458)[&rate=1.9681878430692032E-4]:9.829620745310137,18[&rate=1.5449957790358615E-4]:0.0)[&rate=2.833776394922313E-4]:6.442777663739207,13[&rate=2.6245116453496993E-4]:9.14277766373921)[&rate=2.3567343273037399E-4]:12.90181530111468,2[&rate=2.2202913321295908E-4]:39.644592964853885)[&rate=2.264507401863478E-4]:6.691069437702282,3[&rate=1.6030276239287688E-4]:51.235662402556166)[&rate=1.5449957790358615E-4]:25.228377119481436,20[&rate=4.264481224605703E-4]:137.5640395220376)[&rate=2.0095953789154151E-4]:7.026666632302238,19[&rate=1.133466262141112E-4]:144.59070615433984)[&rate=1.0]:0.0;
tree STATE_600000 = ((((((((1[&rate=3.282907489570951E-4]:21.553088628418692,16[&rate=1.391597841035941E-4]:11.553088628418692)[&rate=5.369173971887672E-4]:6.63254597997539,17[&rate=4.0392451814536353E-4]:18.185634608394082)[&rate=3.282907489570951E-4]:2.114365391605915,18[&rate=1.9969200224013428E-4]:0.0)[&rate=1.391597841035941E-4]:8.041816488661937,(((((4[&rate=2.851602583029904E-4]:6.762253472964325,5[&rate=3.3972380764021425E-4]:6.762253472964325)[&rate=2.1131432752722522E-4]:23.763588487284412,12[&rate=8.581696779288618E-4]:30.525841960248737)[&rate=1.094020884584627E-4]:16.15005022319846,((6[&rate=4.346240277434916E-4]:4.0184107586457,7[&rate=2.956559994257484E-4]:4.0184107586457)[&rate=4.1879155186464123E-4]:23.86788465014203,(8[&rate=4.346240277434916E-4]:6.056917359310348,((9[&rate=1.737637747398615E-4]:0.046873272129962944,11[&rate=2.747724457961003E-4]:0.046873272129962944)[&rate=5.121412676136507E-4]:2.9763199966153473,10[&rate=2.6444072375894997E-4]:3.02319326874531)[&rate=7.544005968103245E-4]:3.033724090565038)[&rate=4.0392451814536353E-4]:21.829378049477384)[&rate=3.637711616431777E-4]:18.789596774659465)[&rate=1.9969200224013428E-4]:25.424107816552798,14[&rate=2.4371465969018582E-4]:0.0)[&rate=2.956559994257484E-4]:15.906766047337584,15[&rate=2.747724457961003E-4]:22.006766047337578)[&rate=3.0630957464343966E-4]:6.335050441324356)[&rate=2.956559994257484E-4]:3.0706517214174767,13[&rate=5.651424988655595E-4]:13.812468210079416)[&rate=2.956559994257484E-4]:1.1573859165879838,(2[&rate=3.8987585433411797E-4]:13.456806114441136,3[&rate=5.121412676136507E-4]:18.356806114441135)[&rate=2.1131432752722522E-4]:19.11304801222626)[&rate=2.1131432752722522E-4]:5.007474076114846,20[&rate=4.5160482624336873E-4]:103.57732820278224)[&rate=5.980345019587854E-4]:9.181928376839622,19[&rate=1.5830144834158615E-4]:112.75925657962186)[&rate=1.0]:0.0;
tree STATE_615000 = ((((((1[&rate=6.300254028995578E-4]:19.681127217080075,(3[&rate=2.47698549380376E-4]:9.43065229546621,15[&rate=0.0011216055647988402]:4.530652295466211)[&rate=3.2068181778871746E-4]:5.150474921613863)[&rate=2.47698549380376E-4]:4.814581503835157,((((4[&rate=1.5759448926618312E-4]:10.799189932955139,8[&rate=4.041617934899559E-4]:10.799189932955139)[&rate=7.11910913407617E-4]:25.512133148295874,(((5[&rate=9.902400718303172E-4]:1.1204554759684033,12[&rate=1.7422727704613644E-4]:1.1204554759684033)[&rate=7.11910913407617E-4]:4.814180316068198,((6[&rate=3.055569459206049E-4]:1.733750289478409,11[&rate=5.649091244394393E-4]:1.733750289478409)[&rate=2.3349665660818926E-4]:1.804274137372043,7[&rate=1.7422727704613644E-4]:3.538024426850452)[&rate=1.1711919444829621E-4]:2.396611365186149)[&rate=3.688535623784627E-4]:21.52484978641267,(9[&rate=0.001332457750466346]:2.1261120315667204,10[&rate=3.688535623784627E-4]:2.1261120315667204)[&rate=4.866393094784868E-4]:25.33337354688255)[&rate=4.866393094784868E-4]:8.85183750280174)[&rate=8.491120642877033E-5]:29.68867691874899,16[&rate=3.055569459206049E-4]:0.0)[&rate=6.68345237306212E-4]:6.099999999999994,14[&rate=5.107276416212009E-4]:0.0)[&rate=2.3349665660818926E-4]:8.395708720915238)[&rate=1.1711919444829621E-4]:25.58846808023479,((2[&rate=6.68345237306212E-4]:20.477056209807742,13[&rate=5.649091244394393E-4]:2.8770562098077477)[&rate=1.1711919444829621E-4]:6.6602127209997235,18[&rate=6.68345237306212E-4]:6.837268930807468)[&rate=5.366985477149946E-4]:12.946907870342557)[&rate=5.958175031859624E-4]:3.831187431061508,17[&rate=1.1711919444829621E-4]:43.91536423221153)[&rate=7.623713327525806E-4]:1.1458611359038713,20[&rate=3.8612352994441484E-4]:111.0612253681154)[&rate=2.47698549380376E-4]:2.8256038258632827,19[&rate=1.3913659424380273E-4]:113.88682919397868)[&rate=1.0]:0.0;
tree STATE_630000 = (((((((((1[&rate=6.129983440107947E-4]:16.164756588529528,15[&rate=7.912301971110463E-4]:6.164756588529528)[&rate=1.3250135127280832E-4]:3.2397635964365747,14[&rate=1.6002187075057298E-4]:3.3045201849661083)[&rate=4.008356498006121E-4]:5.044837972997954,(4[&rate=1.886703674336077E-4]:40.46218777855259,(((5[&rate=1.188882079285081E-4]:4.819384704254273,12[&rate=9.107270022476052E-5]:4.819384704254273)[&rate=1.4617063810631835E-4]:7.15054918355161,(6[&rate=5.679248822196433E-4]:8.851260345004228,(7[&rate=0.0012699153809570033]:0.2860818546044251,8[&rate=0.0012699153809570033]:0.2860818546044251)[&rate=1.188882079285081E-4]:8.565178490399802)[&rate=0.0010997670272523837]:3.1186735428016554)[&rate=0.0010997670272523837]:2.6866702470167088,((9[&rate=9.728014646352231E-4]:2.985416295531962,10[&rate=2.521944400717662E-4]:2.985416295531962)[&rate=0.0012699153809570033]:9.550320597441669,11[&rate=2.191641538789324E-4]:12.535736892973631)[&rate=2.885337740249396E-4]:2.120867241848961)[&rate=2.6989653487468815E-4]:25.805583643729996)[&rate=2.0364422553329956E-4]:39.98717037941147)[&rate=5.950650254685556E-5]:4.944259746008399,16[&rate=2.6989653487468815E-4]:19.393617903972455)[&rate=7.912301971110463E-4]:0.12101373343604394,17[&rate=5.950650254685556E-5]:19.5146316374085)[&rate=3.082307009790386E-4]:8.933273804875299,((2[&rate=4.008356498006121E-4]:18.5655788620643,13[&rate=0.0010997670272523837]:0.9655788620643051)[&rate=3.5139534799574686E-4]:1.2345708750161748,3[&rate=1.6002187075057298E-4]:24.700149737080473)[&rate=2.0364422553329956E-4]:8.647755705203323)[&rate=1.3250135127280832E-4]:5.4406090072505435,18[&rate=0.003082016115751008]:13.588514449534344)[&rate=0.0015182315255788757]:0.734914198390797,20[&rate=4.91484521103519E-4]:100.62342864792514)[&rate=9.107270022476052E-5]:3.864852195460074,19[&rate=1.6002187075057298E-4]:104.48828084338521)[&rate=1.0]:0.0;
tree STATE_645000 = ((((((((1[&rate=3.0053814171880632E-5]:10.0,16[&rate=0.005985318258885666]:0.0)[&rate=1.3630837887111533E-4]:4.266909352277025,(((4[&rate=2.2203523162991662E-4]:42.473536615758476,(((6[&rate=8.554583490768766E-4]:1.777821645545464,7[&rate=1.3630837887111533E-4]:1.777821645545464)[&rate=4.328477340607893E-4]:22.383502164036393,(8[&rate=2.67829780131101E-4]:11.064952642882654,(9[&rate=2.2203523162991662E-4]:3.5865798169644267,10[&rate=5.937619164180408E-4]:3.5865798169644267)[&rate=8.554583490768766E-4]:7.4783728259182265)[&rate=1.5090669285828948E-4]:13.096371166699205)[&rate=3.9200860447182427E-4]:15.888992813034875,11[&rate=5.937619164180408E-4]:40.050316622616734)[&rate=0.001370216876716608]:2.4232199931417426)[&rate=2.1107623119345767E-5]:5.1962976103879726,(5[&rate=0.005985318258885666]:4.153329378714637,12[&rate=8.554583490768766E-4]:4.153329378714637)[&rate=1.5090669285828948E-4]:43.51650484743181)[&rate=9.810684735338737E-5]:18.33016577385355,15[&rate=3.557491687650953E-4]:0.0)[&rate=4.7671008267567605E-5]:4.266909352277025)[&rate=2.67829780131101E-4]:1.833090647722969,14[&rate=9.84475030202482E-4]:0.0)[&rate=4.7671008267567605E-5]:1.7200596473996228,17[&rate=3.0053814171880632E-5]:7.820059647399617)[&rate=1.5090669285828948E-4]:13.331438700419213,((3[&rate=1.091330773620029E-5]:22.499999999999993,13[&rate=2.941858351884955E-4]:0.0)[&rate=0.0016833425073823616]:2.700000000000003,18[&rate=4.7671008267567605E-5]:0.0)[&rate=1.5090669285828948E-4]:0.8514983478188327)[&rate=1.5090669285828948E-4]:1.6530970566306422,2[&rate=7.515258883531443E-4]:22.804595404449472)[&rate=0.0011496492897993995]:5.177770920046058,20[&rate=5.32301274665091E-4]:93.98236632449553)[&rate=2.2203523162991662E-4]:3.0385528866132745,19[&rate=1.8361144815899556E-4]:97.0209192111088)[&rate=1.0]:0.0;
tree STATE_660000 = (((((((1[&rate=6.831122282963857E-4]:28.17177221194804,(((4[&rate=3.537561195046478E-4]:16.460418357795472,(5[&rate=3.537561195046478E-4]:5.357273905027189,12[&rate=2.8374614748789264E-4]:5.357273905027189)[&rate=1.8286901281729456E-4]:11.103144452768284)[&rate=4.8476846380171324E-4]:14.622583714694144,((6[&rate=6.831122282963857E-4]:5.5731642699582995,7[&rate=1.313462396864096E-4]:5.5731642699582995)[&rate=6.179649019483824E-4]:15.388855744168483,((8[&rate=2.4162775846630203E-4]:2.4425137644925403,(10[&rate=2.2893655969717793E-4]:1.3093954208184821,11[&rate=4.3245189806524525E-5]:1.3093954208184821)[&rate=2.2893655969717793E-4]:1.1331183436740582)[&rate=3.981050543137973E-4]:4.837982215910191,9[&rate=1.212215420594001E-4]:7.280495980402732)[&rate=5.655838428235182E-4]:13.68152403372405)[&rate=7.683073585607283E-4]:10.120982058362834)[&rate=6.302836333543956E-5]:43.90701493251332,(14[&rate=5.655838428235182E-4]:0.0,(15[&rate=3.749183338100473E-4]:1.4651398330521062,16[&rate=2.4162775846630203E-4]:1.4651398330521062)[&rate=2.8374614748789264E-4]:4.634860166947888)[&rate=1.9380850764349098E-4]:2.890017005002946)[&rate=1.8286901281729456E-4]:9.181755206945098)[&rate=1.8286901281729456E-4]:4.844618675782968,17[&rate=4.3245189806524525E-5]:23.016390887731006)[&rate=6.302836333543956E-5]:1.7613330555477944,18[&rate=3.16267712540627E-4]:4.477723943278804)[&rate=1.722182244310483E-4]:8.930319714236234,13[&rate=5.655838428235182E-4]:16.10804365751504)[&rate=2.549322508522098E-4]:4.204052083786664,(2[&rate=7.712064690909512E-5]:25.57710297111467,3[&rate=6.831122282963857E-4]:30.477102971114668)[&rate=4.8476846380171324E-4]:12.334992770187029)[&rate=3.16267712540627E-4]:1.497709791186054,20[&rate=4.523732905464942E-4]:105.40980553248775)[&rate=1.722182244310483E-4]:24.114894437022286,19[&rate=7.712064690909512E-5]:129.52469996951004)[&rate=1.0]:0.0;
tree STATE_675000 = ((((((1[&rate=1.3918043677449952E-4]:16.178304468144432,(14[&rate=2.463003536497309E-4]:0.0,17[&rate=4.183479294587716E-4]:6.099999999999994)[&rate=2.7842261750804406E-4]:0.07830446814443803)[&rate=1.0775744073231759E-4]:1.1278814423070145,2[&rate=1.6337166917978777E-4]:7.306185910451447)[&rate=2.0552846862552113E-4]:12.99381408954855,18[&rate=3.260655112284369E-4]:0.0)[&rate=2.2579588213125068E-4]:11.363983754140222,(((3[&rate=3.531716784984525E-4]:22.499999999999993,13[&rate=0.0011566569259114123]:0.0)[&rate=1.3918043677449952E-4]:7.43924046202342,16[&rate=1.517548717544572E-4]:25.039240462023415)[&rate=3.531716784984525E-4]:2.389994542093575,(((4[&rate=1.6337166917978777E-4]:44.838478952124056,5[&rate=3.260655112284369E-4]:44.838478952124056)[&rate=3.013560496394341E-4]:8.885222535082917,((((6[&rate=2.5677513568775904E-4]:4.587289098350013,7[&rate=1.7437569316890492E-4]:4.587289098350013)[&rate=8.76609903946944E-4]:4.088813855019776,(8[&rate=2.156614419737629E-4]:2.8258924546740194,11[&rate=3.835205202517125E-4]:2.8258924546740194)[&rate=1.849798596775081E-4]:5.85021049869577)[&rate=2.0552846862552113E-4]:1.3551561656929092,12[&rate=3.835205202517125E-4]:10.031259119062698)[&rate=3.392728673244243E-4]:9.691174438675409,(9[&rate=5.78198412516509E-4]:2.9710619402019245,10[&rate=1.6337166917978777E-4]:2.9710619402019245)[&rate=4.836011553379275E-4]:16.751371617536183)[&rate=2.0552846862552113E-4]:34.00126792946887)[&rate=1.2500890398461925E-4]:15.844593344408274,15[&rate=6.786962446667121E-4]:3.5682948316152476)[&rate=1.7437569316890492E-4]:23.860940172501742)[&rate=4.596017301235125E-4]:4.234748750023229)[&rate=6.224593561830818E-4]:7.535905194413317,20[&rate=4.002748721185345E-4]:105.19988894855354)[&rate=4.3800708603913374E-4]:8.545842943220691,19[&rate=8.166746565364904E-5]:113.74573189177423)[&rate=1.0]:0.0;
tree STATE_690000 = ((((((1[&rate=2.235501787213476E-4]:21.13431824110259,17[&rate=1.6412490065216448E-4]:11.13431824110259)[&rate=1.314412211327621E-4]:1.6320119541112774,(((4[&rate=1.9903385921352497E-4]:53.826437117531135,(((5[&rate=3.3367562879822943E-4]:6.747393828261154,12[&rate=3.4998584361570516E-4]:6.747393828261154)[&rate=4.2574552634270667E-4]:9.030981281868272,11[&rate=1.9903385921352497E-4]:15.778375110129424)[&rate=2.4395414439781367E-4]:25.914467838258844,((6[&rate=3.3367562879822943E-4]:4.357727797484157,7[&rate=3.6940568881041756E-4]:4.357727797484157)[&rate=1.9317789947334858E-4]:24.7147771287515,((8[&rate=3.935551549887598E-4]:0.9548697566354988,10[&rate=2.301003220627996E-4]:0.9548697566354988)[&rate=1.9317789947334858E-4]:2.1106545737078073,9[&rate=3.6940568881041756E-4]:3.065524330343306)[&rate=4.7464378093530006E-4]:26.00698059589235)[&rate=1.7001073886305443E-4]:12.620338022152612)[&rate=3.070753084884569E-4]:12.133594169142867)[&rate=1.45515976115808E-4]:15.061025379168221,15[&rate=2.9584258474912926E-4]:2.8874624966993565)[&rate=3.935551549887598E-4]:8.578186838187577,16[&rate=2.4395414439781367E-4]:11.465649334886933)[&rate=3.070753084884569E-4]:1.3006808603269349)[&rate=1.314412211327621E-4]:19.99326415506576,(((2[&rate=3.4998584361570516E-4]:12.166510781775571,3[&rate=2.5134932599952614E-4]:17.06651078177557)[&rate=1.9903385921352497E-4]:17.896409272868894,14[&rate=1.387345680299726E-4]:23.96292005464447)[&rate=1.0229805336320005E-4]:0.4806705491059944,18[&rate=4.2574552634270667E-4]:10.243590603750462)[&rate=3.4998584361570516E-4]:2.216003746529168)[&rate=1.8160144638577262E-4]:5.905620198932709,13[&rate=2.301003220627996E-4]:21.065214549212342)[&rate=1.2337567991459083E-4]:8.602544416385115,20[&rate=4.7464378093530006E-4]:113.26775896559745)[&rate=2.5134932599952614E-4]:8.921240555282495,19[&rate=1.2337567991459083E-4]:122.18899952087995)[&rate=1.0]:0.0;
tree STATE_705000 = ((((((1[&rate=2.5050604107536187E-4]:30.299999999999997,18[&rate=3.589383607608329E-4]:0.0)[&rate=2.173826427509738E-4]:7.325862194423934,3[&rate=6.137646956801819E-4]:32.52586219442393)[&rate=2.874413769351608E-4]:0.03304403961627145,(((4[&rate=3.2513595433227634E-4]:44.82614214090269,((((5[&rate=4.2501885927982334E-4]:4.477944199832378,6[&rate=3.682942117081892E-4]:4.477944199832378)[&rate=3.682942117081892E-4]:1.111568206518153,(7[&rate=2.5050604107536187E-4]:0.20194838304533452,11[&rate=4.5588406416328063E-4]:0.20194838304533452)[&rate=2.173826427509738E-4]:5.387564023305196)[&rate=3.021805310895183E-4]:18.307064930648032,(8[&rate=2.874413769351608E-4]:9.750489872811261,(9[&rate=4.5588406416328063E-4]:3.1763423096236725,10[&rate=4.3955632137608266E-4]:3.1763423096236725)[&rate=4.967472661198602E-4]:6.574147563187589)[&rate=3.589383607608329E-4]:14.146087464187303)[&rate=3.021805310895183E-4]:17.609289719416612,12[&rate=2.6549253213207347E-4]:41.50586705641518)[&rate=2.580660553005327E-4]:3.3202750844875126)[&rate=2.2631573411390475E-4]:25.64148260489435,15[&rate=4.3955632137608266E-4]:4.467624745797039)[&rate=2.4275096127914625E-4]:16.16931487772942,((14[&rate=4.7461809897184683E-4]:7.699134649013857,17[&rate=3.886125753647108E-4]:13.799134649013851)[&rate=2.2631573411390475E-4]:0.5177448854949347,16[&rate=1.6809982290950235E-4]:14.316879534508786)[&rate=3.500059126970933E-4]:6.320060089017673)[&rate=3.021805310895183E-4]:7.0219666105137435)[&rate=3.4143078735068805E-4]:4.561463534774674,(2[&rate=2.2631573411390475E-4]:27.96272352744154,13[&rate=3.0968506892688403E-4]:10.362723527441545)[&rate=3.331569617142323E-4]:4.257646241373337)[&rate=3.331569617142323E-4]:1.5170343804266935,20[&rate=5.240146289433691E-4]:99.73740414924157)[&rate=2.580660553005327E-4]:0.9352529159978644,19[&rate=1.6809982290950235E-4]:100.67265706523943)[&rate=1.0]:0.0;
tree STATE_720000 = ((((((((1[&rate=1.69126844397209E-4]:10.0,16[&rate=2.5866484585026193E-4]:0.0)[&rate=3.359415731159219E-4]:6.099999999999994,14[&rate=1.6030509712882963E-4]:0.0)[&rate=2.9267472915996503E-4]:14.115229096393364,3[&rate=1.69126844397209E-4]:25.115229096393357)[&rate=3.4670069278159936E-4]:11.373501645830856,2[&rate=2.5866484585026193E-4]:31.588730742224215)[&rate=4.570868911168622E-4]:6.411655134718899,((((4[&rate=3.4670069278159936E-4]:29.582716426699793,(5[&rate=4.570868911168622E-4]:3.10246450439022,12[&rate=5.01120727837725E-4]:3.10246450439022)[&rate=2.5866484585026193E-4]:26.480251922309574)[&rate=1.1522634409609923E-4]:38.096221911383566,(((6[&rate=4.0536773435773576E-4]:0.6402213766711379,11[&rate=3.260762718649928E-4]:0.6402213766711379)[&rate=2.0407883756831948E-4]:2.2733988702302295,7[&rate=2.650478672778662E-4]:2.9136202469013672)[&rate=3.0032247110510984E-4]:36.16401223346016,((8[&rate=2.1631885124949294E-4]:7.00166568563582,10[&rate=1.6030509712882963E-4]:7.00166568563582)[&rate=1.8432559646566854E-4]:5.804518287427105,9[&rate=1.7703233199044326E-4]:12.806183973062925)[&rate=3.083818607982279E-4]:26.271448507298604)[&rate=1.9118976072139107E-4]:28.601305857721826)[&rate=2.4024148777960342E-4]:15.921061661916639,13[&rate=3.359415731159219E-4]:0.0)[&rate=3.0032247110510984E-4]:5.850174588891633,18[&rate=4.0536773435773576E-4]:3.1501745888916304)[&rate=2.71602857947236E-4]:14.550211288051486)[&rate=3.359415731159219E-4]:2.0634099756933324,(15[&rate=1.1522634409609923E-4]:13.009438172073033,17[&rate=3.719427309442575E-4]:13.009438172073033)[&rate=2.3424832724419607E-4]:27.054357680563413)[&rate=1.69126844397209E-4]:3.7653955337131606,20[&rate=4.0536773435773576E-4]:109.8291913863496)[&rate=2.2231711539359096E-4]:0.45530795187427486,19[&rate=1.69126844397209E-4]:110.28449933822388)[&rate=1.0]:0.0;
tree STATE_735000 = (((1[&rate=5.031173241547478E-4]:33.04707485880034,(((2[&rate=2.0142438590859305E-4]:13.455430965588135,3[&rate=3.8297603757506246E-4]:18.355430965588134)[&rate=3.591170801547077E-4]:8.539492820195761,(13[&rate=1.861680988112705E-4]:3.8020208649424205,17[&rate=1.861680988112705E-4]:21.402020864942415)[&rate=3.148857568636443E-4]:0.5929029208414818)[&rate=2.272095029404004E-4]:0.3774961121876572,(((((4[&rate=3.005090352254004E-4]:8.428228723593712,8[&rate=2.508326875758789E-4]:8.428228723593712)[&rate=2.8085800471848514E-4]:41.70771285032788,(((5[&rate=2.5670014589878427E-4]:12.986958808407794,12[&rate=2.685874539901384E-4]:12.986958808407794)[&rate=5.887343078476705E-4]:3.737396571276216,(6[&rate=2.8085800471848514E-4]:5.950394366539586,7[&rate=1.861680988112705E-4]:5.950394366539586)[&rate=5.887343078476705E-4]:10.773961013144422)[&rate=3.591170801547077E-4]:8.848592063897662,((9[&rate=2.0142438590859305E-4]:3.00311843525962,10[&rate=3.226113386923908E-4]:3.00311843525962)[&rate=2.8085800471848514E-4]:4.230868983062561,11[&rate=3.489032592839751E-4]:7.233987418322181)[&rate=5.887343078476705E-4]:18.33896002525949)[&rate=2.8720892223467573E-4]:24.56299413033992)[&rate=3.395135863067227E-4]:21.24091338362077,(15[&rate=3.489032592839751E-4]:2.4673344041598284,16[&rate=1.861680988112705E-4]:2.4673344041598284)[&rate=2.4498000149199387E-4]:2.909520553382535)[&rate=2.272095029404004E-4]:7.197781459257371,14[&rate=1.941173810029396E-4]:6.47463641679974)[&rate=3.30789554561879E-4]:7.725363583200263,18[&rate=2.8720892223467573E-4]:0.0)[&rate=2.3911345924458252E-4]:2.0724198979715567)[&rate=3.7037180334237817E-4]:0.6746549608287893)[&rate=1.861680988112705E-4]:0.6239971053738032,20[&rate=5.031173241547478E-4]:89.67107196417415)[&rate=3.9739209743971883E-4]:0.19938264048464305,19[&rate=1.861680988112705E-4]:89.87045460465879)[&rate=1.0]:0.0;
tree STATE_750000 = (((((((1[&rate=4.3378753857407297E-4]:10.0,15[&rate=6.798844938432322E-4]:0.0)[&rate=3.216723890237757E-4]:0.5775617197082994,16[&rate=4.5801426293953437E-4]:0.5775617197082994)[&rate=7.153626039969163E-4]:11.820975115850729,(2[&rate=5.275836442619169E-4]:8.39806019689398,17[&rate=0.0010967214481571925]:8.39806019689398)[&rate=5.438981642986102E-4]:4.000476638665049)[&rate=4.977505768910778E-4]:9.574629674336848,(3[&rate=4.3378753857407297E-4]:25.199999999999996,18[&rate=5.122540771987278E-4]:0.0)[&rate=2.9746060873740953E-4]:1.6731665098958786)[&rate=3.216723890237757E-4]:1.5882870741455832,(((((4[&rate=3.216723890237757E-4]:2.2361972262124343,5[&rate=3.3316403967922464E-4]:2.2361972262124343)[&rate=3.884458331287253E-4]:0.7307988593401951,12[&rate=3.3316403967922464E-4]:2.9669960855526294)[&rate=2.8438527320692335E-4]:25.973318863552585,((((6[&rate=2.3645555514343776E-4]:2.2665102636041667,11[&rate=5.122540771987278E-4]:2.2665102636041667)[&rate=0.0010967214481571925]:3.1498701656542623,7[&rate=2.9746060873740953E-4]:5.416380429258429)[&rate=6.240683603822713E-4]:6.603418126866379,8[&rate=3.0982044565169576E-4]:12.019798556124808)[&rate=3.4440651947378995E-4]:6.8889837914602055,(9[&rate=4.5801426293953437E-4]:2.3386321260812335,10[&rate=2.702813041253018E-4]:2.3386321260812335)[&rate=7.593309820847604E-4]:16.57015022150378)[&rate=0.0010967214481571925]:10.031532601520201)[&rate=2.1343906887288578E-4]:43.15968505089478,14[&rate=4.5801426293953437E-4]:0.0)[&rate=2.702813041253018E-4]:16.986663872985602,13[&rate=3.216723890237757E-4]:5.486663872985602)[&rate=3.664805375103155E-4]:0.47478971105586254)[&rate=3.554877552861276E-4]:0.42938197486418517,20[&rate=7.593309820847604E-4]:89.99083555890564)[&rate=2.1343906887288578E-4]:6.684678396684902,19[&rate=1.7629739789956742E-4]:96.67551395559055)[&rate=1.0]:0.0;
tree STATE_765000 = ((((((1[&rate=2.0504696285853814E-4]:41.13016215385498,(2[&rate=3.687408813718836E-4]:20.299999999999997,18[&rate=2.137768437058038E-4]:0.0)[&rate=2.0504696285853814E-4]:10.830162153854985)[&rate=3.0175556283618463E-4]:1.142220628118153,((((((4[&rate=2.137768437058038E-4]:4.837237104341109,8[&rate=1.2000155734764162E-4]:4.837237104341109)[&rate=2.30287355801432E-4]:45.89333348553843,(((5[&rate=3.0175556283618463E-4]:1.3741948900632854,12[&rate=2.4610271067925595E-4]:1.3741948900632854)[&rate=6.414524197605257E-4]:16.67333616650255,((6[&rate=7.801826350320616E-4]:1.8283562211526674,11[&rate=1.459549115963842E-4]:1.8283562211526674)[&rate=2.30287355801432E-4]:1.5682042869808772,7[&rate=5.353991374899724E-4]:3.3965605081335446)[&rate=3.687408813718836E-4]:14.650970548432293)[&rate=3.3753628430013144E-4]:12.722402211775439,(9[&rate=4.3794795355981986E-4]:3.6952435166174022,10[&rate=3.1026149224715313E-4]:3.6952435166174022)[&rate=3.8042299884072644E-4]:27.074689751723874)[&rate=3.57771984010774E-4]:19.960637321538258)[&rate=1.2000155734764162E-4]:15.269429410120466,15[&rate=3.9296328133431476E-4]:0.0)[&rate=4.3794795355981986E-4]:6.107902636619059,14[&rate=2.137768437058038E-4]:0.007902636619064651)[&rate=2.6168379695324284E-4]:10.043445057286121,16[&rate=4.565936013596301E-4]:16.15134769390518)[&rate=3.1026149224715313E-4]:1.9121553157363849,17[&rate=2.934650131083808E-4]:18.063503009641565)[&rate=4.3794795355981986E-4]:14.20887977233157)[&rate=2.934650131083808E-4]:2.063670101591825,3[&rate=3.8042299884072644E-4]:39.23605288356496)[&rate=5.353991374899724E-4]:3.3400054651448983,13[&rate=2.6168379695324284E-4]:20.076058348709864)[&rate=1.459549115963842E-4]:2.4132089539863415,20[&rate=5.353991374899724E-4]:106.0892673026962)[&rate=4.781050572253269E-4]:13.96100343812941,19[&rate=1.2000155734764162E-4]:120.05027074082561)[&rate=1.0]:0.0;
tree STATE_780000 = (((((((((1[&rate=6.054217609250721E-4]:10.0,16[&rate=2.899012432145984E-4]:0.0)[&rate=3.066741635475347E-4]:6.099999999999994,14[&rate=4.256893952705211E-4]:0.0)[&rate=1.245933735188653E-4]:0.7825083862273203,(2[&rate=7.481000207433784E-4]:5.749208935537979,(((4[&rate=3.4237272157199575E-4]:34.373691059163775,((5[&rate=5.34701269136448E-4]:13.134100036466029,(9[&rate=1.8443954414999872E-4]:2.613018227604867,10[&rate=4.759525184318531E-4]:2.613018227604867)[&rate=3.8167372514098254E-4]:10.521081808861162)[&rate=5.040867126226844E-4]:13.413065746608618,((6[&rate=5.97361533738418E-5]:3.3976133996472364,11[&rate=3.8167372514098254E-4]:3.3976133996472364)[&rate=2.7372121373052844E-4]:6.209766489020888,(7[&rate=1.9881723645122736E-4]:5.353484997723608,8[&rate=2.1327294075130127E-4]:5.353484997723608)[&rate=7.481000207433784E-4]:4.253894890944516)[&rate=4.030088208283216E-4]:16.939785894406523)[&rate=8.115454281740777E-4]:7.826525276089129)[&rate=3.4237272157199575E-4]:17.75911643534606,12[&rate=2.2790595863895585E-4]:52.132807494509834)[&rate=8.754986030818478E-5]:13.867192505490166,17[&rate=7.481000207433784E-4]:0.0)[&rate=4.759525184318531E-4]:5.749208935537979)[&rate=4.256893952705211E-4]:1.1332994506893357)[&rate=1.4037601735967349E-4]:3.9072657908082533,15[&rate=5.97361533738418E-5]:10.789774177035568)[&rate=5.97361533738418E-5]:3.4116055993233516,3[&rate=4.759525184318531E-4]:19.101379776358918)[&rate=1.5540502106059265E-4]:6.098620223641078,18[&rate=8.115454281740777E-4]:0.0)[&rate=4.030088208283216E-4]:2.210171927651544,13[&rate=0.0012841841468114233]:4.910171927651547)[&rate=3.066741635475347E-4]:6.222418434221694,20[&rate=5.682739241004099E-4]:94.73259036187324)[&rate=4.256893952705211E-4]:16.241612809182726,19[&rate=8.754986030818478E-5]:110.97420317105596)[&rate=1.0]:0.0;
tree STATE_795000 = (((((((1[&rate=4.701398328627715E-4]:24.17292823443279,2[&rate=2.924263773386705E-4]:14.172928234432788)[&rate=3.981787803865196E-4]:2.450787293283014,(((4[&rate=4.440632039770021E-4]:17.532743356657,5[&rate=2.371056815767641E-4]:17.532743356657)[&rate=8.147833728577725E-5]:14.722682073871525,((((6[&rate=2.371056815767641E-4]:1.40640392343802,(8[&rate=6.565133618216378E-4]:1.178494961849127,11[&rate=2.371056815767641E-4]:1.178494961849127)[&rate=4.440632039770021E-4]:0.22790896158889296)[&rate=6.08296252374112E-4]:3.747849558020539,7[&rate=3.237724092294627E-4]:5.154253481458559)[&rate=2.637569836433777E-4]:13.953345992115304,12[&rate=5.669785559784216E-4]:19.107599473573863)[&rate=4.201943235619818E-4]:10.987448834214593,(9[&rate=2.7780151403635254E-4]:1.718176471931999,10[&rate=2.1191665653212604E-4]:1.718176471931999)[&rate=4.440632039770021E-4]:28.376871835856456)[&rate=0.0017495277141075466]:2.160377122740069)[&rate=1.757217454387162E-4]:44.22374997532172,16[&rate=1.99707953591779E-4]:10.479175405850242)[&rate=2.2436099318873292E-4]:6.14454012186556)[&rate=1.757217454387162E-4]:3.6762844722841947,18[&rate=2.371056815767641E-4]:0.0)[&rate=2.2436099318873292E-4]:1.9447684444231328,(3[&rate=1.99707953591779E-4]:19.267101493024718,((14[&rate=3.407027176876904E-4]:3.297379121485548,15[&rate=5.669785559784216E-4]:9.397379121485542)[&rate=3.981787803865196E-4]:3.35724803728894,17[&rate=6.08296252374112E-4]:12.754627158774483)[&rate=1.99707953591779E-4]:1.612474334250237)[&rate=3.407027176876904E-4]:7.87766695139841)[&rate=4.201943235619818E-4]:0.8341016705242907,13[&rate=4.440632039770021E-4]:5.478870114947426)[&rate=4.988807891272306E-4]:0.7763901007231198,20[&rate=6.08296252374112E-4]:89.85526021567054)[&rate=9.871354905628534E-5]:0.050724015461113936,19[&rate=1.268168063756299E-4]:89.90598423113165)[&rate=1.0]:0.0;
tree STATE_810000 = (((((((1[&rate=4.8199378492554774E-4]:25.555692004809657,(15[&rate=2.4300408772122097E-4]:9.43148843244245,16[&rate=1.9285081370670897E-4]:9.43148843244245)[&rate=3.268787042810832E-4]:6.1242035723672075)[&rate=1.691052277665666E-4]:2.373577673673765,14[&rate=2.894499279589843E-4]:11.829269678483428)[&rate=2.730810262555991E-4]:4.4785648850694315,18[&rate=3.618526099793697E-4]:2.1078345635528564)[&rate=2.98124429452069E-4]:5.028109290280611,((4[&rate=3.268787042810832E-4]:44.44085927032975,(((5[&rate=2.98124429452069E-4]:0.5929513401421965,12[&rate=2.2870828891924326E-4]:0.5929513401421965)[&rate=2.98124429452069E-4]:24.776970336985823,(9[&rate=3.618526099793697E-4]:0.7001206434841011,10[&rate=4.2840458549521293E-4]:0.7001206434841011)[&rate=3.91000617685735E-4]:24.669801033643918)[&rate=3.0720352260213293E-4]:1.1425765182458996,(((6[&rate=4.5228698072766497E-4]:6.319905274796284,7[&rate=2.0742019755721068E-4]:6.319905274796284)[&rate=4.2840458549521293E-4]:1.4576946249089051,8[&rate=3.7565542822435736E-4]:7.777599899705189)[&rate=2.811194443249224E-4]:17.177097585226385,11[&rate=2.1454520239486E-4]:24.95469748493157)[&rate=3.167592016395609E-4]:1.557800710442347)[&rate=3.91000617685735E-4]:17.928361074955834)[&rate=2.0742019755721068E-4]:40.12953358349792,17[&rate=2.98124429452069E-4]:18.57039285382767)[&rate=1.6017585757134814E-4]:8.865551000005794)[&rate=7.133835597354502E-4]:4.041776297700224,((2[&rate=4.8199378492554774E-4]:24.019632356557537,13[&rate=2.894499279589843E-4]:6.419632356557543)[&rate=3.268787042810832E-4]:2.041625620697886,3[&rate=2.4300408772122097E-4]:30.96125797725542)[&rate=4.2840458549521293E-4]:5.416462174278266)[&rate=2.730810262555991E-4]:2.7411670245806903,20[&rate=4.8199378492554774E-4]:100.21888717611438)[&rate=1.3888956682421737E-4]:9.330308534353975,19[&rate=1.8528220092132243E-4]:109.54919571046835)[&rate=1.0]:0.0;
tree STATE_825000 = (((((((1[&rate=2.7329996202693144E-4]:21.906437023974533,(((4[&rate=3.4385819023508127E-4]:8.864495722332808,11[&rate=2.568349824086177E-4]:8.864495722332808)[&rate=1.9231281947458084E-4]:35.78503053184076,((5[&rate=2.6779437056496903E-4]:9.374858517259021,((9[&rate=2.960812493019068E-4]:1.901250374179108,10[&rate=2.568349824086177E-4]:1.901250374179108)[&rate=4.887778711339284E-4]:5.986092368000165,12[&rate=2.343245891124056E-4]:7.887342742179273)[&rate=3.4385819023508127E-4]:1.487515775079748)[&rate=4.5333760322305966E-4]:25.40930075301013,((6[&rate=2.7885609385685064E-4]:0.17521330285027972,8[&rate=5.625194480513851E-4]:0.17521330285027972)[&rate=5.625194480513851E-4]:2.850608433794988,7[&rate=2.902202264448962E-4]:3.025821736645268)[&rate=2.960812493019068E-4]:31.75833753362388)[&rate=3.214673479067929E-4]:9.865366983904423)[&rate=3.083114124856311E-4]:30.894898854214624,16[&rate=2.343245891124056E-4]:9.544425108388197)[&rate=3.1475212495397974E-4]:2.3620119155863364)[&rate=1.8212488895160415E-4]:1.291491457008945,17[&rate=3.2851050936263536E-4]:13.197928480983478)[&rate=2.457652083465676E-4]:8.617690987427594,18[&rate=2.155929500154228E-4]:1.5156194684110744)[&rate=4.1090609929956006E-4]:0.08305618318451025,(3[&rate=2.2214159882977984E-4]:10.999999999999993,14[&rate=2.0858617645947564E-4]:0.0)[&rate=2.457652083465676E-4]:15.798675651595588)[&rate=2.343245891124056E-4]:3.772411483764813,((2[&rate=3.7167311786502616E-4]:18.41695251927844,15[&rate=2.7329996202693144E-4]:18.41695251927844)[&rate=3.5234911093764943E-4]:5.798886630624082,13[&rate=2.902202264448962E-4]:6.615839149902527)[&rate=4.887778711339284E-4]:1.4552479854578735)[&rate=1.467754775956546E-4]:6.336770686238779,20[&rate=5.625194480513851E-4]:98.00785782159917)[&rate=2.5132852158907807E-4]:1.3319024290735655,19[&rate=1.8212488895160415E-4]:99.33976025067274)[&rate=1.0]:0.0;
tree STATE_840000 = (((((((1[&rate=3.8254859677395824E-4]:10.0,16[&rate=1.113090841209572E-4]:0.0)[&rate=1.9599238314011778E-4]:18.125134923079656,14[&rate=1.5574902609305613E-4]:12.025134923079662)[&rate=1.7981333152616892E-4]:1.4356601405592642,17[&rate=1.5574902609305613E-4]:19.56079506363892)[&rate=1.7181205190649757E-4]:0.7392049363610766,18[&rate=2.801461331007287E-4]:0.0)[&rate=4.913002518179086E-4]:13.18955805933426,((2[&rate=1.2127323599030448E-4]:24.26710614226137,((((((4[&rate=3.8254859677395824E-4]:2.4211415258242366,8[&rate=4.2808887000123303E-4]:2.4211415258242366)[&rate=1.7981333152616892E-4]:17.081257188648294,5[&rate=2.126803276609434E-4]:19.50239871447253)[&rate=2.0425287657069766E-4]:30.526077304615324,12[&rate=5.953999251742157E-4]:50.028476019087854)[&rate=2.6921615287891837E-4]:9.741831708313278,((6[&rate=5.352804027752415E-4]:4.521623373780156,7[&rate=2.801461331007287E-4]:4.521623373780156)[&rate=2.0425287657069766E-4]:34.038573054002455,(9[&rate=1.9599238314011778E-4]:8.864068501929166,(10[&rate=6.561996712338922E-5]:7.546494177525946,11[&rate=4.5666147570947796E-4]:7.546494177525946)[&rate=3.4678342246464956E-4]:1.3175743244032203)[&rate=3.4678342246464956E-4]:29.696127925853446)[&rate=2.126803276609434E-4]:21.210111299618518)[&rate=6.898199174055005E-4]:6.229692272598868,15[&rate=2.6921615287891837E-4]:0.0)[&rate=2.801461331007287E-4]:17.599999999999994,13[&rate=2.801461331007287E-4]:0.0)[&rate=3.6372670441653946E-4]:6.667106142261375)[&rate=2.3019907434136878E-4]:8.216152765279773,3[&rate=1.7181205190649757E-4]:37.38325890754114)[&rate=1.3918037948671178E-4]:1.0062991517931152)[&rate=1.9599238314011778E-4]:1.6817301342466493,20[&rate=5.953999251742157E-4]:101.1712881935809)[&rate=1.6380862514998762E-4]:3.736135645283312,19[&rate=1.4756767063231518E-4]:104.90742383886422)[&rate=1.0]:0.0;
tree STATE_855000 = (((((((1[&rate=2.273671248032872E-4]:16.099999999999994,14[&rate=1.7374804671264755E-4]:0.0)[&rate=2.766228432108141E-4]:12.877568903278942,2[&rate=2.273671248032872E-4]:18.977568903278936)[&rate=2.6826681814519804E-4]:5.031381629567562,(3[&rate=2.5415233896943895E-4]:25.006172503269504,(((4[&rate=2.3602454410006737E-4]:57.19827422306597,(((5[&rate=2.9911883044826687E-4]:9.50427046578763,12[&rate=3.072410684323787E-4]:9.50427046578763)[&rate=2.6447796518173694E-4]:29.268835017592433,((6[&rate=1.8192681636890513E-4]:5.868348138657404,7[&rate=2.0168297788448228E-4]:5.868348138657404)[&rate=3.072410684323787E-4]:30.352114472935334,(9[&rate=2.574523211808472E-4]:8.913810960278079,10[&rate=2.4185678617599609E-4]:8.913810960278079)[&rate=2.184903628315652E-4]:27.30665165131466)[&rate=2.9236222212914077E-4]:2.5526428717873273)[&rate=2.1221737030211583E-4]:16.89989798591793,(8[&rate=2.3602454410006737E-4]:20.034825453962796,11[&rate=1.8807995580913032E-4]:20.034825453962796)[&rate=2.478597400923027E-4]:35.6381780153352)[&rate=2.6447796518173694E-4]:1.5252707537679768)[&rate=2.3892604994536613E-4]:8.801725776934028,15[&rate=3.6240564118787737E-4]:0.0)[&rate=3.6240564118787737E-4]:7.11689202158847,16[&rate=3.6240564118787737E-4]:7.11689202158847)[&rate=2.608847818159339E-4]:12.989280481681035)[&rate=2.3602454410006737E-4]:3.902778029576993)[&rate=2.722957432336803E-4]:7.136155258262619,17[&rate=2.3602454410006737E-4]:31.145105791109117)[&rate=2.3892604994536613E-4]:7.4436047220511625,(13[&rate=2.2445276977293258E-4]:7.774533323222741,18[&rate=2.3892604994536613E-4]:5.074533323222738)[&rate=2.766228432108141E-4]:13.214177189937544)[&rate=2.184903628315652E-4]:1.9088723026042516,20[&rate=3.6240564118787737E-4]:106.49758281576453)[&rate=3.6240564118787737E-4]:5.9481165078547065,19[&rate=1.8192681636890513E-4]:112.44569932361924)[&rate=1.0]:0.0;
tree STATE_870000 = (((1[&rate=1.0397921067847156E-4]:50.656901936286815,((((2[&rate=1.7045692196831702E-4]:5.3346809564963,((((4[&rate=2.986220282489083E-4]:3.6695782003987665,8[&rate=3.0942374569380274E-4]:3.6695782003987665)[&rate=2.696986703063939E-4]:16.994273984048345,12[&rate=8.258350096551303E-5]:20.663852184447112)[&rate=1.8507749852218088E-4]:42.21663150313569,((5[&rate=2.0667941849787855E-4]:7.430204745281564,(6[&rate=2.0667941849787855E-4]:6.550222175994549,7[&rate=4.465846807925805E-4]:6.550222175994549)[&rate=2.884632016012552E-4]:0.8799825692870149)[&rate=3.3347666594783066E-4]:31.20946739391036,((9[&rate=2.1395806053090994E-4]:3.436366447379877,10[&rate=1.7782175233635694E-4]:3.436366447379877)[&rate=2.6094470440257337E-4]:7.002258728611158,11[&rate=2.6094470440257337E-4]:10.438625175991035)[&rate=3.3347666594783066E-4]:28.201046963200888)[&rate=2.5252953589887034E-4]:24.24081154839088)[&rate=3.2099037173932097E-4]:3.119516312417197,15[&rate=2.986220282489083E-4]:0.0)[&rate=1.0397921067847156E-4]:5.3346809564963)[&rate=3.3347666594783066E-4]:17.523776638361383,((14[&rate=1.994644173502343E-4]:0.0,16[&rate=3.620799110793119E-4]:6.099999999999994)[&rate=2.5252953589887034E-4]:14.200000000000003,18[&rate=1.1763647770184225E-4]:0.0)[&rate=2.444032019045006E-4]:2.5584575948576855)[&rate=1.8507749852218088E-4]:4.985181728057313,3[&rate=3.2099037173932097E-4]:32.743639322914994)[&rate=2.696986703063939E-4]:10.015180506273609,(13[&rate=5.246589183465064E-4]:13.451196028878343,17[&rate=5.246589183465064E-4]:31.051196028878337)[&rate=4.465846807925805E-4]:6.807623800310267)[&rate=2.986220282489083E-4]:2.7980821070982103)[&rate=2.986220282489083E-4]:1.2454520039909198,20[&rate=5.246589183465064E-4]:107.90235394027773)[&rate=3.978848168008096E-4]:12.123948700979142,19[&rate=8.258350096551303E-5]:120.02630264125688)[&rate=1.0]:0.0;
tree STATE_885000 = (((((((((1[&rate=3.37526771714401E-4]:16.099999999999994,14[&rate=1.5196996350749485E-4]:0.0)[&rate=2.848263484190035E-4]:6.059151604005308,15[&rate=2.3892812254065372E-4]:12.159151604005302)[&rate=2.848263484190035E-4]:2.227929358854979,16[&rate=1.2204667434684876E-4]:14.387080962860281)[&rate=5.90760317651961E-4]:0.33623944903499137,((((4[&rate=3.902448539120908E-4]:2.602450213629679,8[&rate=1.7434082081224113E-4]:2.602450213629679)[&rate=3.0472540806789474E-4]:35.443318272269,((6[&rate=3.0472540806789474E-4]:7.909403085624568,(7[&rate=5.485561443310155E-4]:0.03156130060558393,11[&rate=1.386094184603709E-4]:0.03156130060558393)[&rate=9.623935706487945E-5]:7.877841785018984)[&rate=4.059078478412942E-4]:19.30028698198406,(9[&rate=1.2204667434684876E-4]:5.963803944886263,10[&rate=1.386094184603709E-4]:5.963803944886263)[&rate=5.149558405023919E-4]:21.245886122722364)[&rate=9.32859763960405E-4]:10.836078418290057)[&rate=2.4784507090336E-4]:33.3153654573077,(5[&rate=4.059078478412942E-4]:0.7705818594122388,12[&rate=9.32859763960405E-4]:0.7705818594122388)[&rate=2.5685051467888673E-4]:70.59055208379415)[&rate=3.0472540806789474E-4]:3.7600064431653237,17[&rate=3.0472540806789474E-4]:9.121140386371707)[&rate=9.623935706487945E-5]:5.602180025523566)[&rate=1.2204667434684876E-4]:2.164301731606301,3[&rate=3.0472540806789474E-4]:21.787622143501572)[&rate=1.8435638665532375E-4]:12.463780305643112,2[&rate=3.6223364696347254E-4]:29.351402449144686)[&rate=1.5196996350749485E-4]:1.0703249077619859,(13[&rate=4.4185613961782963E-4]:7.914413276746217,18[&rate=4.8697973281009723E-4]:5.214413276746214)[&rate=4.4185613961782963E-4]:4.907314080160461)[&rate=3.7575243533740483E-4]:3.4781654608007386,20[&rate=4.629567277459093E-4]:99.89989281770741)[&rate=5.90760317651961E-4]:2.6690482322225506,19[&rate=9.623935706487945E-5]:102.56894104992996)[&rate=1.0]:0.0;
tree STATE_900000 = ((((((1[&rate=8.929904011271474E-5]:16.099999999999994,14[&rate=4.779828213617742E-4]:0.0)[&rate=5.609978584138657E-4]:18.735460065599696,17[&rate=4.497309323755051E-4]:24.83546006559969)[&rate=1.1227764278512852E-4]:10.528753025780091,(((2[&rate=1.1227764278512852E-4]:15.360034383062995,3[&rate=4.779828213617742E-4]:20.260034383062994)[&rate=2.1453421231314585E-4]:6.89212266398755,13[&rate=2.802025219821334E-4]:4.652157047050551)[&rate=4.058756890767937E-4]:11.528457008601563,15[&rate=7.974035919812278E-4]:33.78061405565211)[&rate=2.625444943872656E-4]:1.5835990357276728)[&rate=4.261572938311231E-4]:3.927426829530603,(((4[&rate=3.203982974161127E-4]:42.49558741087119,(5[&rate=2.9930767663631286E-4]:38.06731823308826,((((6[&rate=4.261572938311231E-4]:3.5313952128669426,(8[&rate=1.913896695497737E-4]:1.98587442729887,11[&rate=1.913896695497737E-4]:1.98587442729887)[&rate=2.3790694627882263E-4]:1.5455207855680726)[&rate=1.387027936010233E-4]:18.30001721467793,7[&rate=1.5833328379311819E-4]:21.831412427544873)[&rate=6.342079650053545E-4]:9.228081891794684,(9[&rate=3.5755518127625997E-4]:3.0683961943527263,10[&rate=2.2224642240802842E-4]:3.0683961943527263)[&rate=3.4424697548866753E-4]:27.99109812498683)[&rate=2.8954459163608033E-4]:6.5522000114090915,12[&rate=4.779828213617742E-4]:37.61169433074865)[&rate=3.880300242034394E-4]:0.45562390233961025)[&rate=3.720544348807497E-4]:4.42826917778293)[&rate=1.1227764278512852E-4]:45.65246215959228,18[&rate=1.9915072994379886E-4]:1.8480495704634734)[&rate=1.5833328379311819E-4]:6.732689339650278,16[&rate=2.802025219821334E-4]:28.88073891011375)[&rate=8.929904011271474E-5]:10.410901010796636)[&rate=1.387027936010233E-4]:23.459033441753476,20[&rate=4.058756890767937E-4]:128.75067336266386)[&rate=2.3790694627882263E-4]:2.7982949979303555,19[&rate=1.5833328379311819E-4]:131.54896836059422)[&rate=1.0]:0.0;
tree STATE_915000 = (((((1[&rate=2.34300910782317E-4]:24.443992153325297,14[&rate=2.6659043225318017E-4]:8.343992153325303)[&rate=2.1229912213681018E-4]:5.8560078466747,18[&rate=3.2848456714413134E-4]:0.0)[&rate=3.1638371113120893E-4]:15.825608811950971,((2[&rate=1.5473138544032546E-4]:27.848488246503365,(((3[&rate=4.377913483979433E-4]:17.48458486168615,16[&rate=1.381200542572462E-4]:12.584584861686153)[&rate=2.946862755814801E-4]:3.0073303937296885,15[&rate=3.2848456714413134E-4]:15.591915255415842)[&rate=1.7698068861621952E-4]:12.056918827903061,(((4[&rate=1.9814632433564646E-4]:19.866736121707554,(5[&rate=2.1229912213681018E-4]:0.24176392416019263,12[&rate=1.2869254624912205E-4]:0.24176392416019263)[&rate=1.911216117222926E-4]:19.62497219754736)[&rate=3.561772158976924E-4]:23.30641842603052,((6[&rate=7.264590313470947E-4]:5.4272447758911175,7[&rate=4.121772910784553E-4]:5.4272447758911175)[&rate=1.6976876143432357E-4]:23.022928998597642,((8[&rate=2.8482343301970963E-4]:1.2664844972381128,10[&rate=2.8482343301970963E-4]:1.2664844972381128)[&rate=2.34300910782317E-4]:1.0313017860106541,(9[&rate=3.416630665575074E-4]:1.6212261815523146,11[&rate=3.1638371113120893E-4]:1.6212261815523146)[&rate=1.0440478301195042E-4]:0.6765601016964524)[&rate=3.561772158976924E-4]:26.152387491239992)[&rate=5.129671245228163E-4]:14.722980773249311)[&rate=1.8408099144440196E-4]:22.826845452261928,17[&rate=1.381200542572462E-4]:0.0)[&rate=2.0519369174815103E-4]:27.648834083318903)[&rate=2.5807737832592533E-4]:0.19965416318446216)[&rate=2.2681896076694473E-4]:3.9708649553948305,13[&rate=2.6659043225318017E-4]:14.219353201898201)[&rate=1.0440478301195042E-4]:4.306255610052773)[&rate=2.5807737832592533E-4]:7.645889627349661,20[&rate=5.129671245228163E-4]:109.77149843930063)[&rate=1.4670329031437896E-4]:4.892799355145954,19[&rate=1.6238057404815978E-4]:114.66429779444658)[&rate=1.0]:0.0;
tree STATE_930000 = (((((((((((1[&rate=1.5291027651250793E-4]:18.913884171143593,15[&rate=3.5318920548147386E-4]:8.913884171143593)[&rate=3.725981992465009E-4]:1.5191685204157181,14[&rate=1.9139242787388888E-4]:4.333052691559317)[&rate=1.8496093230526204E-4]:0.9998778742861845,3[&rate=1.8496093230526204E-4]:16.332930565845494)[&rate=3.086178046967463E-4]:0.09289946693431261,17[&rate=2.7552429435133034E-4]:11.525830032779808)[&rate=2.328487012095904E-4]:2.215598787699463,16[&rate=1.4622910449535307E-4]:13.741428820479271)[&rate=3.725981992465009E-4]:4.945669719627418,((4[&rate=7.475217899267395E-5]:12.850470038002289,8[&rate=1.722262827675187E-4]:12.850470038002289)[&rate=1.97907964553251E-4]:55.44403519306698,(((5[&rate=1.3205626286712523E-4]:2.087374732367206,12[&rate=3.3648517450284363E-4]:2.087374732367206)[&rate=1.8496093230526204E-4]:35.24003822515519,((6[&rate=1.1578160037628702E-4]:2.996214342641458,11[&rate=3.086178046967463E-4]:2.996214342641458)[&rate=2.4862024049706266E-4]:4.87321575411274,7[&rate=2.4056152524793263E-4]:7.869430096754199)[&rate=2.045378025135226E-4]:29.457982860768197)[&rate=1.9139242787388888E-4]:12.227399126021268,(9[&rate=4.24971891765203E-4]:2.1060972174221493,10[&rate=3.725981992465009E-4]:2.1060972174221493)[&rate=2.5708397291419795E-4]:47.44871486612152)[&rate=1.7858289360419093E-4]:18.7396931475256)[&rate=2.966661156011537E-4]:16.392593309037423)[&rate=3.217829884670216E-4]:13.797384123187953,18[&rate=1.9139242787388888E-4]:12.184482663294645)[&rate=2.328487012095904E-4]:1.0464959469205297,13[&rate=1.7858289360419093E-4]:15.930978610215178)[&rate=3.086178046967463E-4]:0.7325117586869254,2[&rate=1.97907964553251E-4]:34.2634903689021)[&rate=7.475217899267395E-5]:24.341126947332256,20[&rate=3.725981992465009E-4]:124.60461731623435)[&rate=1.9139242787388888E-4]:0.920317699061485,19[&rate=1.3205626286712523E-4]:125.52493501529584)[&rate=1.0]:0.0;
tree STATE_945000 = (((((1[&rate=2.128485785475823E-4]:38.43602309988478,((2[&rate=6.354703574042185E-4]:19.43827832181877,17[&rate=7.889164922427386E-5]:19.43827832181877)[&rate=3.333521782965846E-4]:2.435154970497308,(3[&rate=5.972926062952997E-4]:25.980311559892293,(14[&rate=3.646335863277334E-4]:8.972718814860869,16[&rate=1.5969885158627586E-4]:15.072718814860863)[&rate=5.972926062952997E-4]:6.007592745031431)[&rate=6.354703574042185E-4]:0.7931217324237849)[&rate=3.646335863277334E-4]:6.562589807568699)[&rate=4.8162766942799225E-4]:0.2972153278362981,(13[&rate=1.8706044188024907E-4]:7.191830061291284,18[&rate=3.8137708556931863E-4]:4.491830061291282)[&rate=2.771288407561268E-4]:3.9414083664297976)[&rate=4.176639854248688E-4]:5.728376349222344,(((4[&rate=4.176639854248688E-4]:29.2449450446487,((6[&rate=5.636732267134966E-4]:4.997023314902825,(7[&rate=1.2807578724130595E-4]:1.7400362754789207,8[&rate=1.4472633021938056E-4]:1.7400362754789207)[&rate=3.486592760346218E-4]:3.2569870394239047)[&rate=6.796353143885028E-4]:10.38862890736544,((9[&rate=2.5102525151600213E-4]:5.327620910348446,10[&rate=7.889164922427386E-5]:5.327620910348446)[&rate=2.000610740463964E-4]:1.0618662831930878,11[&rate=5.972926062952997E-4]:6.389487193541534)[&rate=0.001175424665358785]:8.996165028726733)[&rate=4.8162766942799225E-4]:13.859292822380432)[&rate=7.889164922427386E-5]:41.23526671452562,(5[&rate=2.255435883804258E-4]:11.783999402845192,12[&rate=2.9058194990917686E-4]:11.783999402845192)[&rate=1.2807578724130595E-4]:58.696212356329134)[&rate=3.8137708556931863E-4]:0.04199479173293241,15[&rate=2.639650715622825E-4]:4.522206550907256)[&rate=2.255435883804258E-4]:29.939408226036164)[&rate=3.9900770122853595E-4]:0.5693019685612484,20[&rate=4.8162766942799225E-4]:101.03091674550467)[&rate=4.176639854248688E-4]:3.8887462148362744,19[&rate=1.4472633021938056E-4]:104.91966296034094)[&rate=1.0]:0.0;
tree STATE_960000 = ((((((1[&rate=5.704039383147427E-4]:26.508774279653835,3[&rate=2.7505522532066546E-4]:21.408774279653834)[&rate=6.049914001398729E-4]:5.869197278068313,13[&rate=2.582032987021033E-4]:4.777971557722154)[&rate=3.670222013116378E-4]:16.806010841713473,(2[&rate=8.460069362419619E-4]:21.092190541126953,(14[&rate=3.670222013116378E-4]:0.0,15[&rate=0.0014510473504118309]:6.099999999999994)[&rate=2.4164959576551182E-4]:14.99219054112696)[&rate=5.092013120020294E-4]:18.091791858308667)[&rate=1.218690600373519E-4]:5.30809207484603,(((((4[&rate=3.4728460531475373E-4]:4.054289113700965,(5[&rate=6.049914001398729E-4]:2.970082959013893,12[&rate=1.218690600373519E-4]:2.970082959013893)[&rate=1.7616768211044955E-4]:1.084206154687072)[&rate=4.092796877624429E-4]:23.46861480817492,(((6[&rate=2.582032987021033E-4]:1.8328049801041097,11[&rate=4.561849007359993E-4]:1.8328049801041097)[&rate=6.848780691543471E-4]:1.372948712818788,7[&rate=2.4164959576551182E-4]:3.205753692922898)[&rate=9.176411092619467E-4]:9.132839710727632,((8[&rate=0.0026075920335980034]:2.99943505402661,9[&rate=4.561849007359993E-4]:2.99943505402661)[&rate=7.317942167632535E-4]:1.1238259787647369,10[&rate=3.100220120969824E-4]:4.123261032791347)[&rate=0.0017802299818896695]:8.215332370859183)[&rate=3.283189054338774E-4]:15.184310518225354)[&rate=1.218690600373519E-4]:44.55454618427555,16[&rate=9.176411092619467E-4]:6.077450106151431)[&rate=4.818176558050421E-4]:12.34243868218313,17[&rate=6.781650441705615E-5]:18.41988878833456)[&rate=6.429173503547084E-4]:1.8801112116654366,18[&rate=2.7505522532066546E-4]:0.0)[&rate=1.7616768211044955E-4]:24.192074474281654)[&rate=1.5915558006759207E-4]:6.2626557618975625,20[&rate=4.561849007359993E-4]:116.75473023617921)[&rate=3.670222013116378E-4]:8.210128911702228,19[&rate=6.781650441705615E-5]:124.96485914788144)[&rate=1.0]:0.0;
tree STATE_975000 = ((((((1[&rate=2.7457794537741104E-4]:22.215853332420224,14[&rate=1.9559320679456526E-4]:6.1158533324202295)[&rate=2.669041461492518E-4]:8.211918896055067,(3[&rate=3.002394350358746E-4]:24.602225791878503,15[&rate=2.2002203694511575E-4]:19.702225791878504)[&rate=1.562034220868825E-4]:0.7255464365967867)[&rate=3.448591453299534E-4]:3.991655419350252,((((4[&rate=1.89450025309909E-4]:8.586958606360588,8[&rate=1.7685156366769033E-4]:8.586958606360588)[&rate=1.9559320679456526E-4]:51.602414111918485,(((5[&rate=2.9116535769937156E-4]:4.939848524132239,12[&rate=3.2051692911650137E-4]:4.939848524132239)[&rate=1.1697644969465933E-4]:6.059993161094704,((6[&rate=2.016888079298522E-4]:0.8923704278512257,11[&rate=3.593009730904705E-4]:0.8923704278512257)[&rate=2.5249621791989876E-4]:4.0473522336634975,7[&rate=1.832190083273573E-4]:4.939722661514723)[&rate=2.7457794537741104E-4]:6.060119023712221)[&rate=3.593009730904705E-4]:14.867123485707726,(9[&rate=4.5279880048421453E-4]:4.456984255669971,10[&rate=1.7028631747222105E-4]:4.456984255669971)[&rate=4.5279880048421453E-4]:21.409980915264697)[&rate=1.832190083273573E-4]:34.322407547344405)[&rate=1.7685156366769033E-4]:5.810627281720926,16[&rate=1.562034220868825E-4]:0.0)[&rate=2.4566888058295475E-4]:21.337016942337527,17[&rate=1.2969290961472533E-4]:21.337016942337527)[&rate=3.002394350358746E-4]:3.082410705488016)[&rate=1.562034220868825E-4]:17.74981350150513,((2[&rate=2.669041461492518E-4]:32.14916636106486,18[&rate=4.5279880048421453E-4]:11.84916636106486)[&rate=2.5249621791989876E-4]:2.770999112335801,13[&rate=2.595602724586143E-4]:17.320165473400664)[&rate=5.02022364827648E-4]:7.2490756759300154)[&rate=1.832190083273573E-4]:0.9336191259157118,20[&rate=3.957236646713988E-4]:109.10286027524639)[&rate=1.1697644969465933E-4]:4.800785050514747,19[&rate=2.2624723478905525E-4]:113.90364532576113)[&rate=1.0]:0.0;
tree STATE_990000 = (((((1[&rate=1.4009260214794335E-4]:30.299999999999997,18[&rate=2.1584000906434936E-4]:0.0)[&rate=1.6626713743771976E-4]:7.528570269244739,(15[&rate=2.367618149969334E-4]:12.939535631683313,17[&rate=1.7617818027650667E-4]:12.939535631683313)[&rate=3.473387323470838E-4]:14.889034637561423)[&rate=6.861289754584735E-4]:3.298264509303621,((((2[&rate=1.5473457725375065E-4]:1.9998445331178374,3[&rate=1.4009260214794335E-4]:6.899844533117836)[&rate=4.5318351580973804E-4]:15.197706507638046,16[&rate=3.969334963119293E-4]:17.197551040755883)[&rate=2.9396933867826007E-4]:0.38924252742623366,(((4[&rate=3.473387323470838E-4]:3.555840892494556,11[&rate=2.2986508474639875E-4]:3.555840892494556)[&rate=3.018876683772963E-4]:39.84292315159231,(((5[&rate=4.8019740026242983E-4]:1.705917020548422,12[&rate=3.827294200601097E-4]:1.705917020548422)[&rate=2.086096415951762E-4]:22.948316272743035,((6[&rate=2.367618149969334E-4]:5.178246102547161,7[&rate=2.1584000906434936E-4]:5.178246102547161)[&rate=5.699162262854804E-4]:0.5967076803681337,8[&rate=1.5473457725375065E-4]:5.774953782915294)[&rate=3.699084682806224E-4]:18.879279510376165)[&rate=2.086096415951762E-4]:2.1920864420490993,(9[&rate=3.1869545696274084E-4]:4.516932540337559,10[&rate=2.2290652962744917E-4]:4.516932540337559)[&rate=6.861289754584735E-4]:22.329387195002997)[&rate=3.699084682806224E-4]:16.55244430874631)[&rate=2.1584000906434936E-4]:28.701235955913127,14[&rate=2.86308620695562E-4]:0.0)[&rate=2.367618149969334E-4]:11.486793568182122)[&rate=3.1869545696274084E-4]:12.65200376929782,13[&rate=4.8019740026242983E-4]:12.638797337479943)[&rate=3.1869545696274084E-4]:0.8880374410684198)[&rate=2.367618149969334E-4]:2.598285279377194,20[&rate=5.159871087878249E-4]:99.72512005792555)[&rate=2.505245851559267E-4]:3.8268879855716733,19[&rate=1.4009260214794335E-4]:103.55200804349722)[&rate=1.0]:0.0;
tree STATE_1005000 = ((((((((1[&rate=2.1807169659405318E-4]:10.0,15[&rate=1.4896795901399562E-4]:0.0)[&rate=1.5391955462916413E-4]:15.20855090816012,17[&rate=1.988218469989626E-4]:15.20855090816012)[&rate=2.078349821550871E-4]:0.7236760846120944,(((4[&rate=1.8341664797249586E-4]:48.047874554008885,(5[&rate=6.606192030424198E-5]:3.7514969835269842,12[&rate=9.501836726429568E-5]:3.7514969835269842)[&rate=1.227376685426914E-4]:44.2963775704819)[&rate=1.1476757323899481E-4]:23.279141833676803,((6[&rate=1.7668360086814207E-4]:6.156738957390722,7[&rate=4.670576527035233E-5]:6.156738957390722)[&rate=1.7668360086814207E-4]:48.750244790193776,(((8[&rate=9.501836726429568E-5]:1.030273165201189,10[&rate=1.5911868872584673E-4]:1.030273165201189)[&rate=1.227376685426914E-4]:2.009582950823089,11[&rate=6.606192030424198E-5]:3.039856116024278)[&rate=2.078349821550871E-4]:6.1040997462472415,9[&rate=9.90400827711812E-5]:9.14395586227152)[&rate=2.620220848267797E-4]:45.76302788531298)[&rate=2.859699989238724E-4]:16.42003264010119)[&rate=1.5911868872584673E-4]:7.803138569378049,16[&rate=2.859699989238724E-4]:13.130154957063738)[&rate=1.352617534279561E-4]:2.802072035708477)[&rate=1.5911868872584673E-4]:6.452290686725291,18[&rate=1.5911868872584673E-4]:2.084517679497509)[&rate=1.988218469989626E-4]:9.246890691107552,(2[&rate=4.0448383982062783E-4]:20.37989090145102,(3[&rate=1.2681738679482175E-4]:18.640457201774602,14[&rate=1.3966791646224854E-4]:7.640457201774609)[&rate=1.1872726849114818E-4]:6.639433699676417)[&rate=1.7044180651006096E-4]:11.251517469154038)[&rate=1.7044180651006096E-4]:25.692284391763437,13[&rate=1.5391955462916413E-4]:39.7236927623685)[&rate=1.1083975032380264E-4]:5.797854657861336,20[&rate=3.227347928645438E-4]:129.12154742022983)[&rate=1.227376685426914E-4]:2.8586411423417815,19[&rate=1.2681738679482175E-4]:131.9801885625716)[&rate=1.0]:0.0;
tree STATE_1020000 = (((((((((1[&rate=3.755919545760473E-4]:10.0,16[&rate=2.354353012316096E-4]:0.0)[&rate=3.4487755210162017E-4]:9.483971450267958,14[&rate=1.5341533285918795E-4]:3.383971450267964)[&rate=2.2854412201780917E-4]:0.689465293098209,(2[&rate=2.488980015441613E-4]:7.128192987717242,3[&rate=3.358939347731382E-4]:12.02819298771724)[&rate=4.3276926947434253E-4]:3.045243755648926)[&rate=4.3276926947434253E-4]:2.1626427198274456,17[&rate=2.0649269788557972E-4]:12.336079463193613)[&rate=5.595225190061227E-4]:8.480749514736587,((4[&rate=2.6221017476402397E-4]:57.92498665843862,((((5[&rate=1.7966684860797765E-4]:5.505436127007387,8[&rate=2.756436395878957E-4]:5.505436127007387)[&rate=2.756436395878957E-4]:3.3032959006528984,12[&rate=1.6814330920789753E-4]:8.808732027660286)[&rate=3.192285732628363E-4]:16.591520433831704,(6[&rate=2.8248315780908425E-4]:4.6857689220766785,7[&rate=3.6459839729425765E-4]:4.6857689220766785)[&rate=1.8952034070548752E-4]:20.71448353941531)[&rate=2.756436395878957E-4]:7.189449431166061,((9[&rate=2.422045872713437E-4]:7.4427350252844215,10[&rate=1.7966684860797765E-4]:7.4427350252844215)[&rate=2.8248315780908425E-4]:6.700319472791716,11[&rate=1.7966684860797765E-4]:14.143054498076138)[&rate=5.105129303087598E-4]:18.44664739458191)[&rate=2.756436395878957E-4]:25.33528476578057)[&rate=3.544083721228993E-4]:8.07501334156138,15[&rate=2.756436395878957E-4]:0.0)[&rate=1.5341533285918795E-4]:20.8168289779302)[&rate=1.9834895763231808E-4]:0.5658515252415413,18[&rate=2.488980015441613E-4]:1.0826805031717441)[&rate=2.488980015441613E-4]:10.472499116682414,13[&rate=3.4487755210162017E-4]:14.255179619854161)[&rate=3.4487755210162017E-4]:4.243722988798993,20[&rate=5.105129303087598E-4]:102.09890260865315)[&rate=1.7966684860797765E-4]:5.797303646834919,19[&rate=1.2928527492202065E-4]:107.89620625548807)[&rate=1.0]:0.0;
tree STATE_1035000 = ((((((((1[&rate=2.8679335970917236E-4]:25.57628194926174,((4[&rate=2.6853334830813266E-4]:54.789666417245044,((5[&rate=2.559651458755325E-4]:18.85812506437008,12[&rate=2.3554975533303173E-4]:18.85812506437008)[&rate=2.1816814546674282E-4]:16.203861669762873,((6[&rate=2.9707821525689027E-4]:10.34042567658347,7[&rate=3.2988586809959403E-4]:10.34042567658347)[&rate=3.220854037785033E-4]:23.764893999414227,(((8[&rate=2.5187832781288017E-4]:0.5100072437920915,9[&rate=3.086221528796476E-4]:0.5100072437920915)[&rate=1.532063635096532E-4]:4.880980983560115,10[&rate=2.773679713627045E-4]:5.3909882273522065)[&rate=3.614523125528868E-4]:5.314319124373002,11[&rate=3.0265997251187804E-4]:10.705307351725208)[&rate=2.8199218745463196E-4]:23.40001232427249)[&rate=1.714275778931844E-4]:0.9566670581352525)[&rate=2.6853334830813266E-4]:19.727679683112093)[&rate=2.918074679167262E-4]:16.204597117457325,16[&rate=2.1816814546674282E-4]:4.99426353470237)[&rate=2.6427376518994893E-4]:10.582018414559371)[&rate=4.009575268861637E-4]:4.723718050738256,18[&rate=2.0836047954435235E-4]:0.0)[&rate=4.009575268861637E-4]:2.343944466538872,2[&rate=2.3137064295575998E-4]:22.64394446653887)[&rate=1.9694953047572772E-4]:11.66706955453229,(14[&rate=2.1816814546674282E-4]:0.0,15[&rate=2.600908100837493E-4]:6.099999999999994)[&rate=2.3554975533303173E-4]:28.211014021071165)[&rate=3.614523125528868E-4]:1.754475111495367,13[&rate=2.3137064295575998E-4]:18.465489132566532)[&rate=2.4781223778088545E-4]:0.966683772748965,(3[&rate=2.600908100837493E-4]:23.96010581382125,17[&rate=2.773679713627045E-4]:19.060105813821252)[&rate=2.8679335970917236E-4]:17.97206709149424)[&rate=1.714275778931844E-4]:0.1854050473341715,20[&rate=4.486444041719289E-4]:103.21757795264966)[&rate=2.6427376518994893E-4]:2.1446371506191895,19[&rate=1.532063635096532E-4]:105.36221510326885)[&rate=1.0]:0.0;
tree STATE_1050000 = (((((1[&rate=2.605711138821318E-4]:11.268126727230666,16[&rate=3.272896579759788E-4]:1.2681267272306656)[&rate=3.0327519978877606E-4]:21.05410540973824,(((2[&rate=3.856750802063364E-4]:14.581704880542802,(14[&rate=3.0327519978877606E-4]:0.0,(15[&rate=3.0327519978877606E-4]:1.9843537567290497,17[&rate=2.650140187476368E-4]:1.9843537567290497)[&rate=2.117253904203242E-4]:4.115646243270945)[&rate=1.8915867649667493E-4]:8.481704880542807)[&rate=2.1761753837235703E-4]:4.484681803885735,13[&rate=3.272896579759788E-4]:1.4663866844285423)[&rate=2.052501302792008E-4]:1.43730500966727,3[&rate=1.9790880829317832E-4]:25.403691694095805)[&rate=1.9790880829317832E-4]:1.8185404428731005)[&rate=3.7188037546277176E-4]:1.2511665839011528,((4[&rate=2.880168221768557E-4]:47.257955172516574,(((5[&rate=2.605711138821318E-4]:0.6009578787123108,12[&rate=2.880168221768557E-4]:0.6009578787123108)[&rate=3.7188037546277176E-4]:10.424655616236466,(6[&rate=2.605711138821318E-4]:3.261471210550648,(7[&rate=3.1458132530908157E-4]:2.2150190244976535,8[&rate=2.282683827630995E-4]:2.2150190244976535)[&rate=2.282683827630995E-4]:1.0464521860529943)[&rate=2.117253904203242E-4]:7.76414228439813)[&rate=3.207237442564561E-4]:23.48116938144701,((9[&rate=2.3321389372350437E-4]:3.9562051816716517,10[&rate=3.856750802063364E-4]:3.9562051816716517)[&rate=3.087852680731499E-4]:11.726165459930886,11[&rate=2.052501302792008E-4]:15.682370641602539)[&rate=2.7399602664888816E-4]:18.82441223479325)[&rate=2.6948238054605943E-4]:12.751172296120785)[&rate=3.1458132530908157E-4]:39.04204482748342,18[&rate=2.471895631171437E-4]:0.0)[&rate=2.516806371413587E-4]:3.2733987208700626)[&rate=2.880168221768557E-4]:3.376937429821794,20[&rate=4.295548255715128E-4]:92.95033615069185)[&rate=1.7769209183125497E-4]:0.4096526111453187,19[&rate=2.2309519517393697E-4]:93.35998876183717)[&rate=1.0]:0.0;
tree STATE_1065000 = ((((((1[&rate=3.2722345613725505E-4]:19.106467947837572,((3[&rate=2.8350231136290815E-4]:4.899999999999999,15[&rate=3.2722345613725505E-4]:0.0)[&rate=2.3739520774692134E-4]:6.748896558632893,(4[&rate=2.2848925806652E-4]:56.97455589442676,(((5[&rate=3.051064968519696E-4]:5.451265621421401,12[&rate=3.1973877897386905E-4]:5.451265621421401)[&rate=4.191496609637119E-4]:6.9125523444266985,((8[&rate=6.121616115962833E-4]:0.13203366307262956,10[&rate=2.2848925806652E-4]:0.13203366307262956)[&rate=3.1237756620397544E-4]:1.9703782131838223,(9[&rate=3.769350156616175E-4]:1.9802390097889233,11[&rate=5.268375922972381E-4]:1.9802390097889233)[&rate=2.9070305222741457E-4]:0.12217286646752856)[&rate=3.5914069570725746E-4]:10.261406089591647)[&rate=3.1973877897386905E-4]:11.840811469502448,(6[&rate=5.007736560555396E-4]:2.237856760260323,7[&rate=3.2722345613725505E-4]:2.237856760260323)[&rate=3.051064968519696E-4]:21.966772675090226)[&rate=2.8350231136290815E-4]:32.76992645907621)[&rate=2.6891014537959267E-4]:15.774340664206136)[&rate=3.427052542574942E-4]:2.3575713892046792)[&rate=2.188137459292941E-4]:11.193532052162425,18[&rate=1.952908686499423E-4]:0.0)[&rate=4.795681008002558E-4]:2.8538844908032814,(2[&rate=4.458662497906213E-4]:17.599999999999994,13[&rate=2.5373465098863944E-4]:0.0)[&rate=3.1237756620397544E-4]:5.553884490803284)[&rate=3.67837594128794E-4]:2.5414223998684093,((14[&rate=4.458662497906213E-4]:0.01187468975528816,17[&rate=1.7899874390765508E-4]:6.1118746897552825)[&rate=3.1973877897386905E-4]:1.7844492091748094,16[&rate=2.6891014537959267E-4]:7.896323898930092)[&rate=3.1973877897386905E-4]:17.798982991741596)[&rate=5.007736560555396E-4]:2.299912989811048,20[&rate=4.795681008002558E-4]:93.99521988048274)[&rate=3.2722345613725505E-4]:1.4232798170960308,19[&rate=1.5213336694715204E-4]:95.41849969757877)[&rate=1.0]:0.0;
tree STATE_1080000 = (((((((1[&rate=6.248898517500413E-4]:11.938721493985511,15[&rate=4.519598669925698E-4]:1.9387214939855113)[&rate=4.683406336892215E-4]:0.6477035880039779,((4[&rate=2.286588180466983E-4]:46.68699228496138,(((5[&rate=3.232412299799671E-4]:16.745343361673047,11[&rate=2.675842246425396E-4]:16.745343361673047)[&rate=1.7875376514703221E-4]:12.446556205081105,(9[&rate=3.328770564470484E-4]:7.224920279351731,(10[&rate=2.0632253240910993E-4]:6.528130264545324,12[&rate=4.519598669925698E-4]:6.528130264545324)[&rate=2.178939278687307E-4]:0.6967900148064068)[&rate=5.288986080302989E-4]:21.96697928740242)[&rate=2.388663787865663E-4]:2.601922222679544,((6[&rate=3.137814368862158E-4]:7.3418948652506515,7[&rate=3.328770564470484E-4]:7.3418948652506515)[&rate=3.528605395375878E-4]:2.6551881142735922,8[&rate=4.683406336892215E-4]:9.997082979524244)[&rate=3.6330930064562724E-4]:21.796738809909453)[&rate=3.328770564470484E-4]:14.89317049552768)[&rate=2.8602442278125067E-4]:19.313007715038623,16[&rate=2.5822515041264377E-4]:0.0)[&rate=4.22821692647009E-4]:2.586425081989489)[&rate=2.8602442278125067E-4]:19.33574869921179,(14[&rate=1.3045907186956602E-4]:14.200000000000003,18[&rate=2.0632253240910993E-4]:0.0)[&rate=2.486823774551346E-4]:1.6221737812012833)[&rate=9.270135747988927E-4]:1.1566247243485606,17[&rate=3.137814368862158E-4]:23.07879850554984)[&rate=6.76558227902368E-4]:1.0221470103201824,(2[&rate=4.519598669925698E-4]:17.919261436407623,(3[&rate=4.86312427186646E-4]:22.499999999999993,13[&rate=4.519598669925698E-4]:0.0)[&rate=3.137814368862158E-4]:0.31926143640762916)[&rate=2.286588180466983E-4]:6.1816840794624)[&rate=4.86312427186646E-4]:6.465881212617802,20[&rate=5.062969983180973E-4]:96.56682672848783)[&rate=5.288986080302989E-4]:1.3448241576473094,19[&rate=1.3045907186956602E-4]:97.91165088613513)[&rate=1.0]:0.0;
tree STATE_1095000 = ((((((1[&rate=5.728566352471684E-4]:4.514607832931205,((4[&rate=1.407442105671953E-4]:9.644534081492038,8[&rate=2.5509799762050023E-4]:9.644534081492038)[&rate=4.0791356563760374E-4]:27.0361261495829,(((5[&rate=2.0351473172224672E-4]:3.8921621722810045,12[&rate=3.140449815816385E-4]:3.8921621722810045)[&rate=1.1483433105183395E-4]:2.398137114853121,(9[&rate=1.834283294619865E-4]:2.1385281623992003,10[&rate=4.2805176016805013E-4]:2.1385281623992003)[&rate=9.826389271099091E-5]:4.151771124734925)[&rate=4.7492576195483355E-4]:13.642641049476225,(6[&rate=3.0131096960332775E-4]:12.012278442075235,(7[&rate=9.826389271099091E-5]:3.569787986219761,11[&rate=4.0791356563760374E-4]:3.569787986219761)[&rate=1.934921985131325E-4]:8.442490455855474)[&rate=0.001185879364584395]:7.920661894535115)[&rate=3.7235349394933344E-4]:16.747719894464588)[&rate=1.2853207176313788E-4]:23.833947601856266)[&rate=2.2369186118301968E-4]:11.58539216706879,14[&rate=5.728566352471684E-4]:0.0)[&rate=2.7739605547936455E-4]:2.1231903748225847,15[&rate=3.564301938770294E-4]:8.223190374822579)[&rate=1.7324365136222206E-4]:15.55408280293517,((((2[&rate=2.6607535770491056E-4]:10.274723452861906,3[&rate=3.7235349394933344E-4]:15.174723452861905)[&rate=9.826389271099091E-5]:7.325276547138088,13[&rate=3.140449815816385E-4]:0.0)[&rate=3.7235349394933344E-4]:2.700000000000003,18[&rate=2.6607535770491056E-4]:0.0)[&rate=2.6607535770491056E-4]:3.20684367940369,(16[&rate=4.2805176016805013E-4]:0.556342695010926,17[&rate=1.6283697955548807E-4]:0.556342695010926)[&rate=1.934921985131325E-4]:22.95050098439276)[&rate=3.564301938770294E-4]:0.27042949835406205)[&rate=2.1356200546473187E-4]:6.448396610278209,20[&rate=5.028457807766611E-4]:96.22566978803596)[&rate=3.7235349394933344E-4]:8.517983988916441,19[&rate=1.52070926255832E-4]:104.7436537769524)[&rate=1.0]:0.0;
tree STATE_1110000 = (((((1[&rate=2.696262995022277E-4]:20.40798618533175,3[&rate=0.0010130364179021154]:15.30798618533175)[&rate=1.9769297738078518E-4]:10.475779794251054,(((4[&rate=1.9769297738078518E-4]:59.32320087217515,(((5[&rate=3.1437636165158964E-4]:13.057498216301488,12[&rate=4.711308058629597E-4]:13.057498216301488)[&rate=2.985430599212883E-4]:19.893268898775453,(6[&rate=5.452183604189889E-4]:7.061632449904989,7[&rate=2.19822983957197E-4]:7.061632449904989)[&rate=3.3132231313034093E-4]:25.88913466517195)[&rate=3.495680565868004E-4]:1.2618691658884487,(((8[&rate=4.711308058629597E-4]:1.9988338021673133,9[&rate=5.05325308723305E-4]:1.9988338021673133)[&rate=3.693455823926675E-4]:1.7731787370162375,10[&rate=2.0857982443419953E-4]:3.772012539183551)[&rate=2.4361900751985316E-4]:0.10126012012611474,11[&rate=5.05325308723305E-4]:3.8732726593096656)[&rate=3.3132231313034093E-4]:30.339363621655725)[&rate=1.7676827266265756E-4]:25.11056459120976)[&rate=1.16550895714383E-4]:16.799964326341012,(14[&rate=1.0599475652474144E-4]:0.0,(15[&rate=1.7676827266265756E-4]:4.14747979222318,16[&rate=1.466835728928346E-4]:4.14747979222318)[&rate=0.0014474050650632056]:1.9525202077768142)[&rate=3.9094770154677363E-4]:4.023165198516168)[&rate=2.3148134785675354E-4]:10.176834801483835,18[&rate=5.05325308723305E-4]:0.0)[&rate=7.287657647409956E-4]:0.5837659795828074)[&rate=2.4361900751985316E-4]:17.98670678113352,((2[&rate=1.466835728928346E-4]:12.518304463979732,17[&rate=1.367577453788279E-4]:12.518304463979732)[&rate=1.6662299512422958E-4]:10.29684058661178,13[&rate=1.5661515673228235E-4]:5.2151450505915165)[&rate=1.9769297738078518E-4]:16.055327710124814)[&rate=4.1475157646959205E-4]:6.038952216618142,20[&rate=3.9094770154677363E-4]:110.90942497733447)[&rate=2.3148134785675354E-4]:0.9001310274676371,19[&rate=1.2675132556202242E-4]:111.8095560048021)[&rate=1.0]:0.0;
tree STATE_1125000 = (((((((1[&rate=3.9080436846163286E-4]:10.0,15[&rate=2.668223782635577E-4]:0.0)[&rate=2.582738646332037E-4]:11.889876055598577,(((4[&rate=1.9716120548615444E-4]:52.437669836609494,((6[&rate=1.353279728856475E-4]:3.9658216230269834,(7[&rate=3.023993794326839E-4]:0.7906464735526346,11[&rate=1.9716120548615444E-4]:0.7906464735526346)[&rate=4.567302601473427E-4]:3.1751751494743488)[&rate=3.023993794326839E-4]:26.527130142329284,((8[&rate=4.567302601473427E-4]:1.7928232835532685,9[&rate=3.4233714694812734E-4]:1.7928232835532685)[&rate=1.9716120548615444E-4]:2.4654591557254157,10[&rate=6.968491373085386E-4]:4.258282439278684)[&rate=5.331917541747991E-4]:26.234669326077583)[&rate=2.497824901684106E-4]:21.944718071253227)[&rate=3.9080436846163286E-4]:11.524793951228567,(5[&rate=3.9080436846163286E-4]:0.858360070530037,12[&rate=2.413053403939495E-4]:0.858360070530037)[&rate=2.754687360100191E-4]:63.10410371730802)[&rate=2.327953947050178E-4]:2.037536212161939,17[&rate=1.0895721182620438E-4]:0.0)[&rate=1.6530032043131113E-4]:11.889876055598577)[&rate=3.9080436846163286E-4]:12.88191466482256,13[&rate=2.0647456362679866E-4]:7.171790720421143)[&rate=5.704960577996191E-4]:1.4147611961942914,(((2[&rate=2.9321566018300244E-4]:6.485155848457694,3[&rate=3.3175796776994075E-4]:11.385155848457693)[&rate=1.9716120548615444E-4]:12.331567731359996,16[&rate=2.842529504053142E-4]:18.81672357981769)[&rate=1.5198860654101154E-4]:2.818051049502415,18[&rate=2.497824901684106E-4]:1.3347746293201084)[&rate=2.9321566018300244E-4]:4.551777287295323)[&rate=2.582738646332037E-4]:0.6376309976532895,14[&rate=3.4233714694812734E-4]:20.724182914268724)[&rate=2.0647456362679866E-4]:3.3889456502279245,20[&rate=5.033128520285732E-4]:96.21312856449664)[&rate=1.8736493769033174E-4]:1.584808242831599,19[&rate=2.668223782635577E-4]:97.79793680732824)[&rate=1.0]:0.0;
tree STATE_1140000 = (((((((1[&rate=3.1253802785402655E-4]:13.489885555043756,3[&rate=2.425886275931285E-4]:8.389885555043755)[&rate=2.2864126011792367E-4]:16.161406215923137,15[&rate=2.7701638983279684E-4]:19.651291770966893)[&rate=4.2517925306573664E-4]:1.1308527954912933,(((4[&rate=2.699091577455024E-4]:54.2986125063837,(5[&rate=4.970842893056937E-4]:35.08153579188562,((((6[&rate=2.532015154926956E-4]:5.96319823431668,7[&rate=3.2323585267854757E-4]:5.96319823431668)[&rate=3.4454209799035317E-4]:20.313490670599613,(8[&rate=3.5554039491773697E-4]:1.2658036892365299,11[&rate=4.076908436685632E-4]:1.2658036892365299)[&rate=3.070827540708097E-4]:25.01088521567976)[&rate=3.670434272507329E-4]:3.965958192262619,(9[&rate=3.730619439072421E-4]:2.1238694306636288,10[&rate=3.179122403658132E-4]:2.1238694306636288)[&rate=2.8983793669658996E-4]:28.11877766651528)[&rate=3.730619439072421E-4]:2.7359680999189067,12[&rate=3.670434272507329E-4]:32.97861519709782)[&rate=2.0471408993578242E-4]:2.102920594787804)[&rate=3.8583143423780424E-4]:19.217076714498077)[&rate=2.0471408993578242E-4]:26.296741690558868,17[&rate=3.3916538673102014E-4]:14.595354196942566)[&rate=2.8983793669658996E-4]:2.158041550310699,(14[&rate=3.9994217804383133E-4]:1.1717558053084076,16[&rate=4.076908436685632E-4]:7.271755805308402)[&rate=2.836144865284149E-4]:9.481639941944863)[&rate=2.8983793669658996E-4]:4.028748819204921)[&rate=2.2864126011792367E-4]:0.3786374223235782,(2[&rate=3.8583143423780424E-4]:17.599999999999994,13[&rate=2.699091577455024E-4]:0.0)[&rate=3.926856651577636E-4]:3.5607819887817698)[&rate=2.8983793669658996E-4]:0.6945979140417364,18[&rate=2.699091577455024E-4]:1.5553799028235034)[&rate=2.532015154926956E-4]:0.5890960702012791,20[&rate=4.76249106590567E-4]:88.44447597302478)[&rate=2.532015154926956E-4]:3.9938843298048567,19[&rate=2.0471408993578242E-4]:92.43836030282964)[&rate=1.0]:0.0;
tree STATE_1155000 = ((((1[&rate=9.431135961956539E-4]:43.0532623211723,(((2[&rate=5.074115408026479E-4]:9.936243820308064,3[&rate=0.0016035067303982143]:14.836243820308063)[&rate=1.0009653049354731E-4]:10.363756179691933,18[&rate=4.2709902551705425E-4]:0.0)[&rate=0.0011349298122465493]:8.558734720473879,13[&rate=0.0011349298122465493]:11.258734720473882)[&rate=7.406086876174666E-4]:4.194527600698422)[&rate=1.74607661022312E-4]:0.5553841049045474,((((4[&rate=2.091911966303469E-4]:56.09632489799518,(5[&rate=2.9980301107665935E-4]:26.422600188774105,((((6[&rate=2.3313395500579903E-4]:6.442092331801694,12[&rate=1.9755116798086215E-4]:6.442092331801694)[&rate=1.8604700770334691E-4]:5.032689171759618,7[&rate=1.5157406843416995E-4]:11.474781503561312)[&rate=4.049277113586013E-4]:0.38139628961070215,8[&rate=8.24937075130025E-4]:11.856177793172014)[&rate=6.755407048014437E-4]:9.897088866225088,((9[&rate=1.8604700770334691E-4]:8.573806976871019,10[&rate=2.2103164184510135E-4]:8.573806976871019)[&rate=0.0011349298122465493]:8.234842183483309,11[&rate=3.1488142331011725E-4]:16.808649160354328)[&rate=5.887246810434866E-5]:4.944617499042774)[&rate=3.47538755803713E-4]:4.669333529377003)[&rate=1.5157406843416995E-4]:29.673724709221077)[&rate=3.47538755803713E-4]:9.903675102004819,17[&rate=4.049277113586013E-4]:0.0)[&rate=6.755407048014437E-4]:8.579545004932058,16[&rate=2.3313395500579903E-4]:8.579545004932058)[&rate=2.2103164184510135E-4]:18.80260330973958,(14[&rate=2.8541606046291075E-4]:2.0499349153897697,15[&rate=2.3313395500579903E-4]:8.149934915389764)[&rate=0.0011349298122465493]:19.232213399281875)[&rate=8.317906342913961E-5]:6.226498111405206)[&rate=5.406543921827933E-4]:4.73674345008844,20[&rate=5.406543921827933E-4]:104.34538987616529)[&rate=9.431135961956539E-4]:4.408695293079589,19[&rate=8.317906342913961E-5]:108.75408516924487)[&rate=1.0]:0.0;
tree STATE_1170000 = ((((((1[&rate=5.128285669939158E-4]:10.0,15[&rate=8.572722116265632E-5]:0.0)[&rate=1.714731613475937E-4]:29.88069202485569,14[&rate=2.629787878920982E-4]:23.780692024855696)[&rate=1.6155631620571722E-4]:0.42126098441436,13[&rate=7.501422940193642E-4]:12.701953009270056)[&rate=1.2650108838939948E-4]:8.540094515103533,(((2[&rate=2.082275819167164E-4]:17.41218640165188,3[&rate=1.5102452643876347E-4]:22.31218640165188)[&rate=1.5102452643876347E-4]:4.134487761028623,(((4[&rate=1.2650108838939948E-4]:27.2713856421361,(5[&rate=1.992677198919687E-4]:5.971722744808493,12[&rate=2.4422784834584287E-4]:5.971722744808493)[&rate=2.1715255221876336E-4]:21.299662897327607)[&rate=1.6155631620571722E-4]:42.69121360299091,(((6[&rate=1.714731613475937E-4]:2.4187891286674668,11[&rate=4.1577579235367736E-4]:2.4187891286674668)[&rate=1.902103899816333E-4]:2.3903424021378528,7[&rate=1.6155631620571722E-4]:4.8091315308053195)[&rate=3.9788530110161505E-4]:24.934621550536434,((8[&rate=2.1715255221876336E-4]:1.531618871878346,9[&rate=5.485909877174004E-4]:1.531618871878346)[&rate=2.930618079607178E-4]:1.6082656013382637,10[&rate=3.0381949268007256E-4]:3.13988447321661)[&rate=3.1504706061155033E-4]:26.603868608125143)[&rate=1.902103899816333E-4]:40.21884616378526)[&rate=1.902103899816333E-4]:16.337400754872988,18[&rate=2.930618079607178E-4]:0.0)[&rate=7.501422940193642E-4]:1.246674162680506)[&rate=1.5102452643876347E-4]:13.917932711919036,(16[&rate=4.3557396699830096E-4]:16.62644752360579,17[&rate=1.2650108838939948E-4]:16.62644752360579)[&rate=1.104466376434644E-4]:18.83815935099375)[&rate=2.4422784834584287E-4]:3.3774406497740443)[&rate=6.549405636223489E-4]:2.907902407542622,20[&rate=5.128285669939158E-4]:107.7499499319162)[&rate=2.629787878920982E-4]:4.986254054286988,19[&rate=1.2650108838939948E-4]:112.7362039862032)[&rate=1.0]:0.0;
tree STATE_1185000 = (((((((1[&rate=7.895220177806967E-4]:25.0816924722874,17[&rate=6.828143859042504E-4]:15.0816924722874)[&rate=1.620059114280954E-4]:14.440017265193518,3[&rate=0.0011564363100845635]:34.42170973748092)[&rate=3.0431862576939863E-4]:7.600902707152798,(2[&rate=6.005841086221996E-4]:30.255623638754386,18[&rate=7.243541023766242E-5]:9.955623638754389)[&rate=8.062908742013153E-5]:6.8669888058793305)[&rate=6.005841086221996E-4]:5.049512841290067,13[&rate=6.005841086221996E-4]:24.57212528592379)[&rate=8.062908742013153E-5]:15.790056409835017,((((4[&rate=2.0457471109054664E-4]:53.460809851306415,((5[&rate=1.7517717346892712E-4]:1.7526791867088205,12[&rate=4.3455520894820936E-4]:1.7526791867088205)[&rate=8.062908742013153E-5]:50.27936925971485,((6[&rate=6.005841086221996E-4]:2.412600428626228,7[&rate=3.6111070435834204E-4]:2.412600428626228)[&rate=1.620059114280954E-4]:26.021832869686595,((8[&rate=0.0015491107147342321]:5.770856801328513,10[&rate=6.44880996199689E-5]:5.770856801328513)[&rate=2.3906860858092063E-4]:0.1538442101874864,(9[&rate=1.7517717346892712E-4]:2.1580428101157745,11[&rate=1.4486314727292311E-5]:2.1580428101157745)[&rate=1.620059114280954E-4]:3.766658201400225)[&rate=4.3455520894820936E-4]:22.509732286796822)[&rate=2.0457471109054664E-4]:23.597615148110844)[&rate=5.672189781957775E-5]:1.4287614048827493)[&rate=3.349127616389566E-5]:15.496586676442796,15[&rate=2.5873078739451974E-4]:2.9573965277492107)[&rate=2.3906860858092063E-4]:3.0414059277619714,16[&rate=7.895220177806967E-4]:5.998802455511182)[&rate=3.0431862576939863E-4]:11.757038856041873,14[&rate=7.243541023766242E-5]:11.655841311553061)[&rate=2.50017816406643E-5]:40.206340384205745)[&rate=2.0457471109054664E-4]:15.872673670479088,20[&rate=3.6111070435834204E-4]:139.8348553662379)[&rate=3.349127616389566E-5]:7.78266534850809,19[&rate=8.912682906446198E-5]:147.61752071474598)[&rate=1.0]:0.0;
tree STATE_1200000 = ((((((1[&rate=4.595407602348836E-4]:23.43117262470892,(15[&rate=5.006168789550172E-4]:7.754018191107917,16[&rate=1.7771749188195873E-4]:7.754018191107917)[&rate=1.6502594931733333E-4]:5.677154433601004)[&rate=1.7771749188195873E-4]:3.4746970150723513,17[&rate=9.916393107777441E-5]:16.905869639781272)[&rate=5.9781710566152544E-5]:7.841824117041398,3[&rate=5.9781710566152544E-5]:29.64769375682267)[&rate=6.972595323446065E-5]:25.92739693051699,(((2[&rate=2.2026266277691979E-4]:18.285375952916368,13[&rate=1.413831879760161E-4]:0.6853759529163739)[&rate=6.706552025692753E-4]:8.500828211569228,((4[&rate=4.2349186804499793E-4]:18.47866098860897,8[&rate=7.950276894935102E-5]:18.47866098860897)[&rate=8.927781392993138E-5]:14.066000377221126,((5[&rate=3.792009890808499E-5]:18.08138311094323,((9[&rate=1.910928015428405E-4]:5.234394035757319,10[&rate=1.1960170122729762E-4]:5.234394035757319)[&rate=8.587136870654978E-4]:9.369407871604551,12[&rate=3.369090445294452E-4]:14.60380190736187)[&rate=1.6502594931733333E-4]:3.4775812035813587)[&rate=2.0524085299162436E-4]:1.8700542833596145,((6[&rate=7.950276894935102E-5]:2.015261968159778,11[&rate=0.0010015543185212946]:2.015261968159778)[&rate=4.595407602348836E-4]:6.0971097150630404,7[&rate=2.2026266277691979E-4]:8.112371683222818)[&rate=6.037944415410521E-4]:11.839065711080025)[&rate=5.006168789550172E-4]:12.593223971527252)[&rate=3.792009890808499E-5]:60.2415427986555)[&rate=4.2349186804499793E-4]:8.733501695723376,(14[&rate=0.0010015543185212946]:16.334713931715072,18[&rate=3.792009890808499E-5]:2.134713931715069)[&rate=5.006168789550172E-4]:13.084991928493906)[&rate=5.9781710566152544E-5]:15.155384827130689)[&rate=6.972595323446065E-5]:7.592762872991585,20[&rate=4.2349186804499793E-4]:124.26785356033125)[&rate=2.7183286368766317E-4]:5.901097159094945,19[&rate=1.0924761554884186E-4]:130.1689507194262)[&rate=1.0]:0.0;
tree STATE_1215000 = (((((((1[&rate=0.0017401408322347681]:23.859994468850175,2[&rate=1.461437783153884E-4]:13.859994468850175)[&rate=1.0415283415802003E-4]:8.278674335451726,((14[&rate=1.0415283415802003E-4]:0.0,15[&rate=6.182972448964144E-4]:6.099999999999994)[&rate=5.411264304315348E-4]:14.200000000000003,18[&rate=8.630723818331491E-5]:0.0)[&rate=2.076861713710478E-4]:1.8386688043019035)[&rate=1.3311826078160526E-4]:1.6758644039795314,(((4[&rate=1.5871162951282305E-4]:17.42541683029422,(5[&rate=2.457105752450799E-4]:15.075464131681986,(11[&rate=3.017371654140127E-4]:0.5356096976389565,12[&rate=1.832223688919048E-4]:0.5356096976389565)[&rate=3.017371654140127E-4]:14.53985443404303)[&rate=0.0010152741319466609]:2.3499526986122348)[&rate=2.8694871575389965E-4]:29.23002768939296,(((6[&rate=5.091512718034985E-4]:1.4883682201221347,8[&rate=0.0017401408322347681]:1.4883682201221347)[&rate=2.3276721768312724E-4]:6.056693621015995,7[&rate=1.0415283415802003E-4]:7.54506184113813)[&rate=0.0017401408322347681]:7.104166592220178,(9[&rate=2.2011432024517759E-4]:3.697512730334377,10[&rate=1.3311826078160526E-4]:3.697512730334377)[&rate=7.235592202999308E-4]:10.95171570302393)[&rate=1.7102401662372595E-4]:32.00621608632887)[&rate=2.727320426454456E-4]:37.60061949401758,16[&rate=1.3311826078160526E-4]:18.25606401370476)[&rate=1.832223688919048E-4]:5.5584691945766735)[&rate=6.182972448964144E-4]:1.706596724810609,(3[&rate=3.171831828237626E-4]:22.499999999999993,13[&rate=7.943589231762283E-4]:0.0)[&rate=2.076861713710478E-4]:7.921129933092047)[&rate=0.0010152741319466609]:0.43448485044369534,17[&rate=6.076731051346412E-5]:25.955614783535736)[&rate=1.832223688919048E-4]:0.1159487172114666,20[&rate=5.411264304315348E-4]:92.0715635007472)[&rate=1.3311826078160526E-4]:1.042114554760829,19[&rate=1.461437783153884E-4]:93.11367805550803)[&rate=1.0]:0.0;
tree STATE_1230000 = ((((((1[&rate=1.1684310868195275E-4]:23.23986192904816,17[&rate=2.2392443929697238E-4]:13.23986192904816)[&rate=7.989851555649725E-5]:7.060138070951837,18[&rate=5.265675238764661E-4]:0.0)[&rate=4.137743242701265E-4]:5.35464226229648,((((2[&rate=2.727677717086277E-4]:15.739448306200302,(14[&rate=2.901745542821164E-4]:0.0,15[&rate=0.0010810580129627396]:6.099999999999994)[&rate=1.9329640059029832E-4]:9.639448306200308)[&rate=3.272430485408084E-4]:1.7040994600614425,((4[&rate=3.272430485408084E-4]:25.28705892202465,5[&rate=3.0829848059878807E-4]:25.28705892202465)[&rate=2.901745542821164E-4]:8.145751131639784,(((6[&rate=4.389112336606349E-4]:4.796885414572086,7[&rate=1.1684310868195275E-4]:4.796885414572086)[&rate=9.688761742656704E-4]:8.282065555706758,12[&rate=1.3286118637452227E-4]:13.078950970278845)[&rate=3.9022798225573805E-4]:1.8342229302415713,(((8[&rate=4.137743242701265E-4]:0.14001195716328854,9[&rate=7.989851555649725E-5]:0.14001195716328854)[&rate=9.961669214696587E-5]:1.619032114911869,11[&rate=9.688761742656704E-4]:1.7590440720751574)[&rate=0.0012292607733749735]:1.4394230525318272,10[&rate=3.9022798225573805E-4]:3.1984671246069847)[&rate=9.688761742656704E-4]:11.714706775913431)[&rate=3.9022798225573805E-4]:18.519636153144017)[&rate=5.293092905447213E-5]:50.01073771259731)[&rate=4.658817969616612E-4]:6.346157763416869,16[&rate=4.389112336606349E-4]:23.789705529678614)[&rate=2.901745542821164E-4]:0.017374863592067413,13[&rate=8.794683324096196E-4]:6.207080393270687)[&rate=1.7828227103054651E-4]:1.847561869025796)[&rate=6.889528114662723E-4]:7.906561212334594,3[&rate=9.961669214696587E-5]:38.46120347463107)[&rate=2.0847676031139135E-4]:1.1835171610749455,20[&rate=4.949801697714379E-4]:100.74472063570602)[&rate=3.9022798225573805E-4]:0.3963393282356549,19[&rate=1.3286118637452227E-4]:101.14105996394167)[&rate=1.0]:0.0;
tree STATE_1245000 = ((((((((1[&rate=1.2576703383852174E-4]:10.0,15[&rate=2.3948373009570115E-4]:0.0)[&rate=3.8197722570971235E-4]:19.571543695782765,((((4[&rate=2.499801801004849E-4]:2.228367587725754,5[&rate=5.250885675309028E-4]:2.228367587725754)[&rate=2.3948373009570115E-4]:63.32719721293911,(((6[&rate=3.8197722570971235E-4]:4.736063933953447,7[&rate=3.3485541274193737E-4]:4.736063933953447)[&rate=6.65573591346102E-4]:13.862216500130227,((8[&rate=1.1233660990780944E-4]:4.3579413412276615,11[&rate=4.1993348434461627E-4]:4.3579413412276615)[&rate=4.934806652102507E-4]:2.996970112184517,(9[&rate=3.078828221602468E-4]:1.9004195316353787,10[&rate=2.191419036287412E-4]:1.9004195316353787)[&rate=3.078828221602468E-4]:5.4544919217768)[&rate=7.451463637147954E-4]:11.243368980671494)[&rate=1.796203112648964E-4]:1.7235377452211367,12[&rate=1.696261318550093E-4]:20.32181817930481)[&rate=7.179298087933805E-5]:45.233746621360055)[&rate=1.1233660990780944E-4]:0.44443519933513187,16[&rate=1.3774347043121095E-4]:0.0)[&rate=6.65573591346102E-4]:8.949341978586943,(14[&rate=2.3948373009570115E-4]:0.0,17[&rate=3.4953195505766136E-4]:6.099999999999994)[&rate=2.6076104715567556E-4]:2.849341978586949)[&rate=1.8949711997756302E-4]:10.622201717195821)[&rate=1.3774347043121095E-4]:0.7284563042172323,18[&rate=3.3485541274193737E-4]:0.0)[&rate=2.718801126919767E-4]:2.985440630565961,3[&rate=2.499801801004849E-4]:28.185440630565957)[&rate=1.696261318550093E-4]:3.717490947768866,2[&rate=8.710951480653956E-4]:27.002931578334824)[&rate=2.718801126919767E-4]:2.252583002481984,13[&rate=2.191419036287412E-4]:11.655514580816813)[&rate=3.8197722570971235E-4]:3.16932190394553,20[&rate=5.62345981154737E-4]:98.42483648476234)[&rate=2.0919714426702064E-4]:12.28317119123939,19[&rate=1.1233660990780944E-4]:110.70800767600173)[&rate=1.0]:0.0;
tree STATE_1260000 = ((((((1[&rate=2.542520217815148E-4]:31.226532712962353,17[&rate=5.682582660021096E-4]:21.226532712962353)[&rate=1.5023177360524043E-4]:20.29196170608897,((13[&rate=2.3674618454443206E-4]:8.428238179789489,(15[&rate=2.4832516546680083E-4]:20.299999999999997,18[&rate=5.682582660021096E-4]:0.0)[&rate=2.936808960515165E-4]:5.728238179789486)[&rate=2.86457299529595E-4]:3.880506907715798,14[&rate=1.7630547086514446E-4]:23.808745087505287)[&rate=2.936808960515165E-4]:11.609749331546041)[&rate=1.1646741359183123E-4]:2.6742248573286815,3[&rate=2.7292340805048625E-4]:49.09271927638)[&rate=3.179606247965942E-4]:17.3634042117384,((2[&rate=2.1394503466049003E-4]:15.874437341970875,((4[&rate=2.7292340805048625E-4]:66.0281366139636,((6[&rate=2.603069585433533E-4]:12.206019383259093,(7[&rate=2.4832516546680083E-4]:10.089761984647305,8[&rate=2.603069585433533E-4]:10.089761984647305)[&rate=3.0128644235881283E-4]:2.116257398611788)[&rate=2.3674618454443206E-4]:22.17828083874979,((9[&rate=3.0128644235881283E-4]:2.2431521628427196,11[&rate=1.9618283331089857E-4]:2.2431521628427196)[&rate=2.3104166171407638E-4]:1.6752081382874957,10[&rate=2.542520217815148E-4]:3.9183603011302153)[&rate=3.6104116590691325E-4]:30.465939920878668)[&rate=1.7630547086514446E-4]:31.643836391954714)[&rate=1.7630547086514446E-4]:1.3159902247974316,(5[&rate=1.8331308654844235E-4]:7.544253160707178,12[&rate=3.485186366762913E-4]:7.544253160707178)[&rate=3.485186366762913E-4]:59.79987367805385)[&rate=2.86457299529595E-4]:14.530310503209847)[&rate=2.196699259856643E-4]:11.454205209343513,16[&rate=3.093484763433347E-4]:27.32864255131439)[&rate=1.1646741359183123E-4]:34.227480936804014)[&rate=3.272434406826226E-4]:2.369760861480927,20[&rate=4.405430948805351E-4]:129.92588434959933)[&rate=2.1394503466049003E-4]:0.892732411145289,19[&rate=1.5023177360524043E-4]:130.81861676074462)[&rate=1.0]:0.0;
tree STATE_1275000 = ((((((1[&rate=7.72329169646735E-4]:10.0,15[&rate=3.1533312763541444E-4]:0.0)[&rate=6.002063371515613E-4]:20.078706716063294,(((4[&rate=9.790125635571482E-5]:14.300635217063743,8[&rate=2.3978449900133306E-4]:14.300635217063743)[&rate=2.696955210110526E-4]:25.94949763734045,(((5[&rate=0.001014929119797478]:20.466160332349208,12[&rate=1.8497040350031924E-4]:20.466160332349208)[&rate=2.696955210110526E-4]:1.7879252857667574,(9[&rate=3.282651071253646E-4]:4.3049559952135334,10[&rate=4.087788889342547E-4]:4.3049559952135334)[&rate=4.534875697617589E-4]:17.949129622902433)[&rate=2.594141856281669E-4]:0.9700785382760948,(6[&rate=5.125335140893236E-4]:6.00590861089579,(7[&rate=3.4201685045884647E-4]:4.944619233956182,11[&rate=1.9395294671553708E-4]:4.944619233956182)[&rate=3.0310176331931445E-4]:1.061289376939608)[&rate=3.898471114206804E-4]:17.21825554549627)[&rate=3.5673441755773767E-4]:17.025968698012132)[&rate=7.449977988972186E-5]:39.14891700822751,14[&rate=7.449977988972186E-5]:7.299049862631705)[&rate=2.494607593190569E-4]:6.679656853431595)[&rate=1.6673444008245752E-4]:34.74714530109867,((3[&rate=5.511715417505524E-4]:35.20630643205114,(16[&rate=2.119559882845995E-4]:22.40703888694391,18[&rate=0.001014929119797478]:2.1070388869439114)[&rate=7.72329169646735E-4]:7.899267545107236)[&rate=3.1533312763541444E-4]:14.504100937478228,13[&rate=2.494607593190569E-4]:27.210407369529378)[&rate=2.3978449900133306E-4]:10.015444647632592)[&rate=4.087788889342547E-4]:1.7149548017843586,(2[&rate=1.5731228913913245E-4]:48.140753054726076,17[&rate=1.75922187140933E-4]:48.140753054726076)[&rate=5.125335140893236E-4]:8.400053764220246)[&rate=2.8036059236401847E-4]:0.12186032901385602,20[&rate=4.534875697617589E-4]:122.66266714796018)[&rate=6.671971304564044E-4]:12.852183374127122,19[&rate=7.449977988972186E-5]:135.5148505220873)[&rate=1.0]:0.0;
tree STATE_1290000 = (((((((1[&rate=1.295400443623379E-4]:20.30042948846581,16[&rate=4.376622490241448E-4]:10.30042948846581)[&rate=2.1564726636912277E-4]:10.282863383770831,13[&rate=0.0020642004688301726]:2.983292872236646)[&rate=0.0014366122709318751]:10.9613633076236,(3[&rate=6.600932629651515E-4]:27.354428150685415,(((4[&rate=1.7394488044119558E-4]:16.539248588177763,5[&rate=0.0014366122709318751]:16.539248588177763)[&rate=3.207050959441253E-4]:35.03175278777737,(((6[&rate=2.732114710376249E-4]:3.8702597506859355,8[&rate=2.0176336720219466E-4]:3.8702597506859355)[&rate=1.7394488044119558E-4]:1.2686620759563842,7[&rate=2.732114710376249E-4]:5.13892182664232)[&rate=3.556717077101463E-4]:28.765489962909147,((9[&rate=4.87470891677867E-4]:4.32431557286895,(10[&rate=2.1564726636912277E-4]:3.4635736082597117,12[&rate=4.152807083132113E-4]:3.4635736082597117)[&rate=3.942721257576045E-4]:0.8607419646092382)[&rate=1.1257165937762854E-4]:3.0405837258536916,11[&rate=2.296518448103584E-4]:7.364899298722642)[&rate=3.7445384751229517E-4]:26.539512490828827)[&rate=1.295400443623379E-4]:17.666589586403667)[&rate=2.732114710376249E-4]:34.72899862404486,18[&rate=5.461386549279355E-4]:0.0)[&rate=0.0014366122709318751]:2.154428150685419)[&rate=3.7445384751229517E-4]:9.090228029174824)[&rate=2.8850121660354546E-4]:1.6576999367471217,2[&rate=1.7394488044119558E-4]:33.20235611660736)[&rate=6.600932629651515E-4]:1.0115192486827027,((14[&rate=6.600932629651515E-4]:0.780560681512469,15[&rate=1.1257165937762854E-4]:6.880560681512463)[&rate=3.942721257576045E-4]:16.646424468591945,17[&rate=2.1564726636912277E-4]:23.52698515010441)[&rate=6.600932629651515E-4]:10.686890215185656)[&rate=6.452020596565898E-5]:18.706028559545317,20[&rate=4.152807083132113E-4]:118.91990392483538)[&rate=8.337738825689503E-4]:9.873378848181687,19[&rate=6.452020596565898E-5]:128.79328277301707)[&rate=1.0]:0.0;
tree STATE_1305000 = ((((((1[&rate=4.3642733743423824E-4]:24.69944389063015,(14[&rate=2.0671340437815726E-4]:4.3438827457077025,(15[&rate=2.0671340437815726E-4]:0.9882736597812567,16[&rate=2.601800892450615E-4]:0.9882736597812567)[&rate=3.436939150306429E-4]:9.45560908592644)[&rate=9.346683915272521E-4]:4.255561144922453)[&rate=2.789729306605708E-4]:9.138279857578837,((13[&rate=1.691615542892496E-4]:2.1492119818915256,17[&rate=3.2023802548934065E-4]:19.74921198189152)[&rate=2.4210647708782014E-4]:0.5507880181084772,18[&rate=1.691615542892496E-4]:0.0)[&rate=1.1761560821347041E-4]:3.5377237482089896)[&rate=9.346683915272521E-4]:1.9846153924213183,(2[&rate=3.5642536268089617E-4]:21.92916490345729,3[&rate=2.5107482306088166E-4]:26.82916490345729)[&rate=4.576770418472139E-4]:3.893174237173014)[&rate=1.7907088400948433E-4]:3.203817285321051,((4[&rate=1.339026915705067E-4]:7.307007528926281,5[&rate=2.601800892450615E-4]:7.307007528926281)[&rate=2.1558657654824012E-4]:48.86000510689314,(((6[&rate=3.3166599778564065E-4]:2.7583954505691946,11[&rate=9.346683915272521E-4]:2.7583954505691946)[&rate=4.8189234883572657E-4]:3.5087431104914675,7[&rate=3.3166599778564065E-4]:6.267138561060662)[&rate=3.845351095705961E-4]:22.444837589024942,((8[&rate=1.9772567275628817E-4]:4.39438099217898,12[&rate=2.601800892450615E-4]:4.39438099217898)[&rate=5.867538314041073E-4]:10.23526292400393,(9[&rate=3.845351095705961E-4]:1.693768772132514,10[&rate=2.4210647708782014E-4]:1.693768772132514)[&rate=3.3166599778564065E-4]:12.935875144050396)[&rate=5.101211635586418E-4]:14.082332233902694)[&rate=1.7907088400948433E-4]:27.455036485733814)[&rate=2.3323240438014723E-4]:38.85914379013194)[&rate=3.2023802548934065E-4]:10.265752121710463,20[&rate=5.867538314041073E-4]:105.29190854766182)[&rate=2.1558657654824012E-4]:0.3836505390048188,19[&rate=1.339026915705067E-4]:105.67555908666664)[&rate=1.0]:0.0;
tree STATE_1320000 = (((((1[&rate=2.187251392906979E-4]:20.783131680004857,3[&rate=1.4288251269975788E-4]:15.683131680004855)[&rate=2.1065871994458159E-4]:17.315117645310096,2[&rate=1.6623570541278066E-4]:28.098249325314953)[&rate=1.5537950934913912E-4]:3.7002417710018563,(((((4[&rate=3.1156105954693056E-4]:38.89554589122335,((5[&rate=5.822094212552476E-4]:16.740483879233206,((9[&rate=3.428569064759343E-4]:5.1751039762434745,10[&rate=2.2671002581031095E-4]:5.1751039762434745)[&rate=2.670023819645246E-4]:10.595435227182914,11[&rate=4.724126952436669E-4]:15.770539203426388)[&rate=2.5876195008998193E-4]:0.9699446758068184)[&rate=8.117905747748141E-4]:8.142961000514234,((6[&rate=8.117905747748141E-4]:3.826015744077394,(8[&rate=3.5449675323191184E-4]:3.510884664451523,12[&rate=2.4263050694083255E-4]:3.510884664451523)[&rate=3.428569064759343E-4]:0.31513107962587084)[&rate=5.822094212552476E-4]:1.3313529034927734,7[&rate=3.3188660700841764E-4]:5.157368647570167)[&rate=3.3188660700841764E-4]:19.726076232177274)[&rate=5.822094212552476E-4]:14.01210101147591)[&rate=1.5537950934913912E-4]:27.10445410877665,16[&rate=5.822094212552476E-4]:0.0)[&rate=2.1065871994458159E-4]:6.099999999999994,14[&rate=4.287447792923461E-4]:0.0)[&rate=3.1156105954693056E-4]:15.608297759396265,((15[&rate=5.004192379721199E-4]:13.43795892274774,17[&rate=3.9489248319891934E-4]:13.43795892274774)[&rate=4.287447792923461E-4]:6.8620410772522575,18[&rate=2.187251392906979E-4]:0.0)[&rate=4.4897023687109287E-4]:1.4082977593962624)[&rate=2.9288871195787557E-4]:6.735064700441868,13[&rate=4.1090282009948565E-4]:10.843362459838133)[&rate=1.6623570541278066E-4]:3.355128636478682)[&rate=3.8032914413125906E-4]:1.0006905479942816,20[&rate=5.353829818029507E-4]:98.79918164431109)[&rate=4.724126952436669E-4]:0.7692747287995161,19[&rate=1.5537950934913912E-4]:99.5684563731106)[&rate=1.0]:0.0;
tree STATE_1335000 = (((((1[&rate=2.1375608832281245E-4]:17.747121924685928,(3[&rate=2.0739853624019368E-4]:4.899999999999999,16[&rate=3.334051138755499E-4]:0.0)[&rate=3.9685604888237873E-4]:7.747121924685928)[&rate=2.323348153527511E-4]:10.060867838840181,(2[&rate=2.2618500462427072E-4]:10.371033507423192,(14[&rate=1.6240231300710645E-4]:0.0,15[&rate=1.1623390352382983E-4]:6.099999999999994)[&rate=4.694164990753946E-4]:4.271033507423198)[&rate=2.7704834516280747E-4]:7.436956256102917)[&rate=2.702760922459903E-4]:7.624605612692761,(((((4[&rate=2.636835998945692E-4]:29.102116402742894,(5[&rate=2.1375608832281245E-4]:7.715742043987812,12[&rate=2.446676914491029E-4]:7.715742043987812)[&rate=2.323348153527511E-4]:21.38637435875508)[&rate=2.3848579020585505E-4]:17.563583577594976,((6[&rate=2.323348153527511E-4]:5.513135723932639,(7[&rate=2.509090267714702E-4]:1.816503452983813,8[&rate=3.9685604888237873E-4]:1.816503452983813)[&rate=1.38315107126824E-4]:3.696632270948826)[&rate=3.436252456783146E-4]:20.841622141334938,((9[&rate=2.2618500462427072E-4]:0.5847320752551822,11[&rate=3.436252456783146E-4]:0.5847320752551822)[&rate=4.156530074728451E-4]:1.7819575118778985,10[&rate=2.702760922459903E-4]:2.366689587133081)[&rate=4.3883225336661843E-4]:23.988068278134495)[&rate=3.067442684414516E-4]:20.310942115070294)[&rate=4.3883225336661843E-4]:22.865858102698134,17[&rate=6.131375683709048E-4]:3.5315580830360034)[&rate=2.5723803882307655E-4]:16.768441916963994,18[&rate=2.323348153527511E-4]:0.0)[&rate=2.323348153527511E-4]:3.144725155079641,13[&rate=3.671019395594854E-4]:5.844725155079644)[&rate=2.2000415481141595E-4]:1.9878702211392323)[&rate=1.1623390352382983E-4]:3.977255043594056,20[&rate=4.694164990753946E-4]:95.40985041981293)[&rate=2.0739853624019368E-4]:3.7323233330799184,19[&rate=1.7145881706032243E-4]:99.14217375289284)[&rate=1.0]:0.0;
tree STATE_1350000 = ((((((1[&rate=3.1267595114679283E-4]:18.158092541746143,3[&rate=4.4227518331423695E-4]:13.058092541746142)[&rate=3.359243065376239E-4]:14.558827596475226,13[&rate=2.036940855573894E-4]:5.116920138221374)[&rate=3.2405349027627713E-4]:3.0555172922920804,2[&rate=2.9112791597455794E-4]:25.77243743051345)[&rate=5.445335986626815E-4]:0.8005760593324567,((((((((4[&rate=2.609810216395058E-4]:7.441249004837466,(5[&rate=9.243349388158983E-5]:1.208284123380563,12[&rate=2.3228226099643824E-4]:1.208284123380563)[&rate=2.7080707155390654E-4]:6.232964881456903)[&rate=4.4227518331423695E-4]:19.591689617674675,11[&rate=6.296318799782449E-4]:27.03293862251214)[&rate=2.609810216395058E-4]:9.096936022798069,(((6[&rate=6.939751228670609E-4]:6.629713136057087,7[&rate=1.1882834805078926E-4]:6.629713136057087)[&rate=3.017213730138258E-4]:13.680969635799578,(9[&rate=3.4836984406308176E-4]:2.91844471978434,10[&rate=3.2405349027627713E-4]:2.91844471978434)[&rate=7.939268603489404E-4]:17.392238052072326)[&rate=1.620504840996908E-4]:0.5216068358762307,8[&rate=2.5131578579767243E-4]:20.832289607732896)[&rate=2.417653564810697E-4]:15.297585037577313)[&rate=2.5131578579767243E-4]:29.87012535468979,15[&rate=3.753883465337336E-4]:0.0)[&rate=1.1882834805078926E-4]:7.336903325732777,14[&rate=3.753883465337336E-4]:1.2369033257327828)[&rate=4.2340402055984506E-4]:7.2047939881873475,16[&rate=5.133034827640986E-4]:14.541697313920125)[&rate=2.609810216395058E-4]:5.7583026860798725,18[&rate=2.3228226099643824E-4]:0.0)[&rate=1.732510491916496E-4]:0.5645108298379,17[&rate=3.017213730138258E-4]:20.864510829837897)[&rate=2.3228226099643824E-4]:5.708502660008008)[&rate=9.243349388158983E-5]:0.2718738497154334,20[&rate=5.445335986626815E-4]:92.84488733956134)[&rate=2.036940855573894E-4]:28.733750555214883,19[&rate=9.243349388158983E-5]:121.57863789477622)[&rate=1.0]:0.0;
tree STATE_1365000 = (((((((1[&rate=2.3555593247261058E-4]:24.02840642786586,17[&rate=2.3555593247261058E-4]:14.02840642786586)[&rate=2.4068551068239161E-4]:4.081233280116749,(14[&rate=1.9613875864356016E-4]:0.0,15[&rate=2.627265122389629E-4]:6.099999999999994)[&rate=2.060517845173269E-4]:12.009639707982615)[&rate=2.2066623126150317E-4]:5.00075794024589,((((4[&rate=2.8188044841261404E-4]:35.838298390906466,5[&rate=2.890550561934981E-4]:35.838298390906466)[&rate=3.5036359077845255E-4]:18.842663799522768,((6[&rate=2.687843067558538E-4]:9.6973517806407,(7[&rate=1.5433520375013633E-4]:8.88621035925945,11[&rate=2.569260352040465E-4]:8.88621035925945)[&rate=2.9676999008187597E-4]:0.8111414213812491)[&rate=2.4068551068239161E-4]:38.30457716476349,((8[&rate=3.365006041467808E-4]:11.713733454162107,(9[&rate=2.569260352040465E-4]:7.897455497884376,10[&rate=1.6181732746678988E-4]:7.897455497884376)[&rate=3.0515395851874887E-4]:3.8162779562777303)[&rate=2.4068551068239161E-4]:29.47474781185979,12[&rate=3.8958731138691863E-4]:41.188481266021896)[&rate=2.157943612857403E-4]:6.813447679382293)[&rate=3.5036359077845255E-4]:6.679033245025046)[&rate=2.157943612857403E-4]:11.319037809570766,16[&rate=1.8579113368425747E-4]:0.0)[&rate=2.060517845173269E-4]:20.299999999999997,18[&rate=1.9613875864356016E-4]:0.0)[&rate=2.157943612857403E-4]:2.810397648228502)[&rate=2.0113101217452211E-4]:9.599889369915118,(2[&rate=1.3416526007288822E-4]:31.859506285339037,13[&rate=1.6181732746678988E-4]:14.259506285339043)[&rate=2.4068551068239161E-4]:0.85078073280458)[&rate=2.890550561934981E-4]:4.210194492163382,3[&rate=3.0515395851874887E-4]:41.820481510307)[&rate=1.8579113368425747E-4]:13.26518878319358,20[&rate=3.8958731138691863E-4]:116.18567029350058)[&rate=3.365006041467808E-4]:1.4100068880980388,19[&rate=1.8033713280962436E-4]:117.59567718159862)[&rate=1.0]:0.0;
tree STATE_1380000 = (((((((1[&rate=3.4995947110687373E-4]:19.50844022283067,((4[&rate=2.551698401987179E-4]:50.90209334092156,(((5[&rate=3.391487801500908E-4]:9.313720952412586,12[&rate=3.391487801500908E-4]:9.313720952412586)[&rate=2.001245808037805E-4]:14.064324869997781,((6[&rate=2.883159405823249E-4]:7.606250993655442,7[&rate=1.519892437179197E-4]:7.606250993655442)[&rate=2.0650374276027627E-4]:10.216738517264135,8[&rate=1.519892437179197E-4]:17.822989510919577)[&rate=1.1690484413238033E-4]:5.555056311490791)[&rate=3.6190306373522864E-4]:11.26091866900408,(9[&rate=2.0650374276027627E-4]:3.7963132558581525,(10[&rate=1.6239151453414504E-4]:1.3052713720772775,11[&rate=2.1883010041546554E-4]:1.3052713720772775)[&rate=2.551698401987179E-4]:2.491041883780875)[&rate=2.4899966609330943E-4]:30.842651235556296)[&rate=5.049678991045101E-4]:16.263128849507112)[&rate=1.1690484413238033E-4]:15.09790665907844,16[&rate=2.956577758647595E-4]:0.0)[&rate=5.990811841318496E-4]:9.508440222830671)[&rate=1.519892437179197E-4]:8.392199286595968,(14[&rate=1.6239151453414504E-4]:0.0,15[&rate=5.049678991045101E-4]:6.099999999999994)[&rate=1.7128553887721344E-4]:11.800639509426645)[&rate=2.551698401987179E-4]:2.3993604905733577,18[&rate=2.308756910328962E-4]:0.0)[&rate=3.391487801500908E-4]:0.49689939773560354,(2[&rate=1.8660383025836952E-4]:14.121724212725198,3[&rate=3.6190306373522864E-4]:19.021724212725196)[&rate=1.7128553887721344E-4]:6.675175185010403)[&rate=1.519892437179197E-4]:13.309481876580818,(13[&rate=2.127220336788374E-4]:13.347454287311848,17[&rate=2.4291231456756063E-4]:30.947454287311842)[&rate=5.049678991045101E-4]:3.158926987004577)[&rate=3.391487801500908E-4]:4.932474540457818,20[&rate=5.049678991045101E-4]:105.03885581477424)[&rate=1.519892437179197E-4]:0.02639265911832922,19[&rate=1.7925396563792586E-4]:105.06524847389257)[&rate=1.0]:0.0;
tree STATE_1395000 = (((1[&rate=3.4381221756328605E-4]:38.2488179314027,((2[&rate=1.6175284022639457E-4]:14.76919568483487,((14[&rate=1.8099158667848878E-4]:2.8292926706442643,16[&rate=2.3774644973203126E-4]:8.929292670644259)[&rate=2.4982891211671035E-4]:3.622467693582138,17[&rate=1.8688033664630943E-4]:12.551760364226396)[&rate=2.0941187502376848E-4]:2.217435320608473)[&rate=3.312789331381566E-4]:9.431703761420408,((3[&rate=1.6175284022639457E-4]:22.499999999999993,13[&rate=3.4381221756328605E-4]:0.0)[&rate=2.3191987738503743E-4]:5.804564287041018,((((4[&rate=2.4982891211671035E-4]:9.540707211823038,8[&rate=2.7668101753431344E-4]:9.540707211823038)[&rate=1.9262415377811626E-4]:37.424288040577764,((((5[&rate=3.4381221756328605E-4]:4.251675937172513,7[&rate=1.5441922748278693E-4]:4.251675937172513)[&rate=2.2619903335081463E-4]:0.5368165795989839,6[&rate=2.626988833968843E-4]:4.7884925167714965)[&rate=1.9262415377811626E-4]:29.353844990918994,(9[&rate=1.045760859611394E-4]:4.451444518184273,(10[&rate=5.540491416639498E-4]:0.511956497445279,11[&rate=2.7668101753431344E-4]:0.511956497445279)[&rate=3.752142243543041E-4]:3.9394880207389935)[&rate=3.582026169324113E-4]:29.690892989506217)[&rate=3.582026169324113E-4]:9.595860813914861,12[&rate=3.007945240973578E-4]:43.73819832160535)[&rate=3.2012698340652245E-4]:3.2267969307954516)[&rate=2.0385450793626423E-4]:19.035004747599196,15[&rate=2.7668101753431344E-4]:0.0)[&rate=1.6852307075061865E-4]:20.299999999999997,18[&rate=1.7489880843458684E-4]:0.0)[&rate=2.3774644973203126E-4]:3.104564287041015)[&rate=3.1003952424916054E-4]:0.7963351592142658)[&rate=2.695264807036331E-4]:4.04791848514742)[&rate=3.4381221756328605E-4]:0.7308049479761962,20[&rate=5.540491416639498E-4]:94.9796228793789)[&rate=3.1003952424916054E-4]:9.758164777777083,19[&rate=1.3668965562021174E-4]:104.73778765715598)[&rate=1.0]:0.0;
tree STATE_1410000 = ((((((((1[&rate=1.4948422037375198E-4]:17.71906241716613,(((4[&rate=1.9936421549788941E-4]:24.461365506519215,5[&rate=5.917383546984023E-4]:24.461365506519215)[&rate=1.919142876890573E-4]:33.11471439542799,((((6[&rate=1.9936421549788941E-4]:1.0279177379771214,11[&rate=4.2764395497779943E-4]:1.0279177379771214)[&rate=3.9874557246961516E-4]:10.63956945443249,7[&rate=1.4948422037375198E-4]:11.667487192409611)[&rate=3.544238329487119E-4]:23.724046911391383,(8[&rate=9.327612579344064E-5]:16.20428141896587,(9[&rate=2.933493251319174E-4]:4.196536792625792,10[&rate=1.704242694466758E-4]:4.196536792625792)[&rate=7.697245782953509E-4]:12.007744626340077)[&rate=1.4948422037375198E-4]:19.187252684835123)[&rate=2.1490897230435485E-4]:10.2521937075078,12[&rate=5.917383546984023E-4]:45.64372781130879)[&rate=1.5646632159338597E-4]:11.93235209063841)[&rate=1.0327828292266653E-4]:8.423920098052797,16[&rate=2.5966897201841726E-4]:0.0)[&rate=3.3658677426961635E-4]:7.719062417166128)[&rate=3.3658677426961635E-4]:0.280371233137771,14[&rate=5.139882674057812E-4]:1.899433650303905)[&rate=2.1490897230435485E-4]:12.300566349696098,18[&rate=2.2308437741257926E-4]:0.0)[&rate=6.228570015663206E-5]:3.2573884177349726,(3[&rate=3.7483723651880307E-4]:20.779877129011076,(15[&rate=1.704242694466758E-4]:12.15419644071082,17[&rate=1.1210922948597064E-4]:12.15419644071082)[&rate=8.102032580147658E-5]:3.7256806883002582)[&rate=2.0701629502990177E-4]:7.677511288723892)[&rate=5.139882674057812E-4]:13.941937970359788,2[&rate=3.9874557246961516E-4]:37.49932638809476)[&rate=2.4981378335193057E-4]:4.212917574712819,13[&rate=2.315896643786872E-4]:24.112243962807582)[&rate=8.102032580147658E-5]:1.4684704897460676,20[&rate=4.642102185489785E-4]:109.18071445255364)[&rate=9.327612579344064E-5]:6.541965626684899,19[&rate=1.4948422037375198E-4]:115.72268007923854)[&rate=1.0]:0.0;
tree STATE_1425000 = (((((1[&rate=1.485464786063399E-4]:15.736542955939143,16[&rate=1.7883192449545145E-4]:5.736542955939143)[&rate=3.794810739430218E-4]:36.55508506250784,((((4[&rate=2.8095587398590247E-4]:30.245579501884837,5[&rate=2.167955506202612E-4]:30.245579501884837)[&rate=1.7883192449545145E-4]:11.444509157585603,((6[&rate=3.794810739430218E-4]:9.794556363853143,(((7[&rate=1.9491502771634765E-4]:0.4056096269623004,11[&rate=4.105392415714542E-4]:0.4056096269623004)[&rate=4.520524477441042E-4]:1.507785481163867,12[&rate=1.3401422064481455E-4]:1.9133951081261673)[&rate=4.7998879152756136E-4]:5.463212403015269,8[&rate=1.6991698570007624E-4]:7.376607511141436)[&rate=3.2313113479174335E-4]:2.4179488527117075)[&rate=3.663236344141177E-4]:17.88113807825558,(9[&rate=2.6601799463100154E-4]:3.5007731390183725,10[&rate=2.516910345451932E-4]:3.5007731390183725)[&rate=3.794810739430218E-4]:24.17492130309035)[&rate=2.516910345451932E-4]:14.014394217361716)[&rate=1.485464786063399E-4]:36.76258916848224,17[&rate=2.8874508811167423E-4]:12.452677827952684)[&rate=2.7339307133643906E-4]:22.1495010618015,18[&rate=4.2951721017224243E-4]:14.302178889754188)[&rate=2.238085049893261E-4]:7.6894491286928)[&rate=4.520524477441042E-4]:1.4682753701637665,(2[&rate=2.516910345451932E-4]:41.004681756029285,((3[&rate=2.968038437831107E-4]:30.192640775589943,13[&rate=1.485464786063399E-4]:7.69264077558995)[&rate=3.543033474592021E-4]:3.934805912098156,(14[&rate=1.1058151580422591E-4]:3.1972248521856557,15[&rate=1.9491502771634765E-4]:9.29722485218565)[&rate=2.0241164730800903E-4]:19.93022183550245)[&rate=3.9407628133629637E-4]:11.777235068341184)[&rate=3.0518126892289965E-4]:2.755221632581467)[&rate=3.432013868404274E-4]:1.7564906711119335,20[&rate=4.7998879152756136E-4]:111.51639405972269)[&rate=2.3770965106325654E-4]:3.637582056676635,19[&rate=1.8709877527176762E-4]:115.15397611639932)[&rate=1.0]:0.0;
tree STATE_1440000 = ((((((1[&rate=4.6732584287243405E-4]:22.712849233905374,((((4[&rate=2.1097851234686078E-4]:46.580377299620885,(5[&rate=2.757621586026433E-4]:10.246748975026687,12[&rate=3.6465789994631913E-4]:10.246748975026687)[&rate=3.4503606972755046E-4]:36.3336283245942)[&rate=2.648587762950995E-4]:15.748489349907338,(((6[&rate=2.757621586026433E-4]:7.020828871022636,11[&rate=2.648587762950995E-4]:7.020828871022636)[&rate=4.969980973125329E-4]:1.2749959828819835,(7[&rate=2.8621378989056166E-4]:3.147708837777818,8[&rate=4.969980973125329E-4]:3.147708837777818)[&rate=3.547889386308284E-4]:5.148116016126801)[&rate=4.1739604338572324E-4]:34.47900252682681,(9[&rate=3.4503606972755046E-4]:2.4443672110520542,10[&rate=9.650354613656008E-4]:2.4443672110520542)[&rate=3.6465789994631913E-4]:40.33046016967938)[&rate=4.062228069309543E-4]:19.554039268796792)[&rate=2.2704305079278593E-4]:3.671133350471777,15[&rate=2.757621586026433E-4]:0.0)[&rate=3.4503606972755046E-4]:6.605338854026115,14[&rate=4.062228069309543E-4]:0.505338854026121)[&rate=3.547889386308284E-4]:6.107510379879258)[&rate=2.2704305079278593E-4]:3.8379896136008966,17[&rate=2.2704305079278593E-4]:16.55083884750627)[&rate=3.6465789994631913E-4]:10.524455523760366,(16[&rate=2.648587762950995E-4]:25.440111277946315,18[&rate=7.984874088251992E-4]:5.140111277946318)[&rate=2.648587762950995E-4]:1.6351830933203217)[&rate=2.8621378989056166E-4]:6.17904105359149,((2[&rate=7.214325427449403E-4]:11.838953588718965,3[&rate=4.411329074874026E-4]:16.738953588718964)[&rate=4.062228069309543E-4]:6.9543391956308795,13[&rate=2.757621586026433E-4]:1.1932927843498504)[&rate=2.963443617684751E-4]:14.461042640508282)[&rate=6.319107354142792E-4]:0.68388560648377,20[&rate=6.008484380571027E-4]:99.9382210313419)[&rate=2.963443617684751E-4]:2.1224025884989572,19[&rate=1.5772142135746575E-4]:102.06062361984085)[&rate=1.0]:0.0;
tree STATE_1455000 = (((((((1[&rate=1.5835839784715444E-4]:26.932970983734208,(3[&rate=0.0012651824169405636]:13.163320320499075,16[&rate=7.152512669219142E-4]:8.263320320499076)[&rate=6.669281007804233E-4]:8.669650663235132)[&rate=3.2504338758023273E-4]:3.2935464457242745,(14[&rate=2.6721020649115445E-4]:0.0,15[&rate=2.2684545714063789E-4]:6.099999999999994)[&rate=5.886697957245583E-4]:14.126517429458488)[&rate=1.4293222771732256E-4]:0.07348257054151475,18[&rate=2.2684545714063789E-4]:0.0)[&rate=1.258544759945133E-4]:4.805401197074431,17[&rate=2.953177152689003E-4]:25.10540119707443)[&rate=1.0554768002462404E-4]:1.6812465131928462,((2[&rate=1.0554768002462404E-4]:16.573581856635784,(4[&rate=2.810973249894544E-4]:45.546577416468864,(((5[&rate=1.0554768002462404E-4]:2.6878927009766143,12[&rate=5.886697957245583E-4]:2.6878927009766143)[&rate=8.432585245331395E-4]:9.164357501837618,(6[&rate=7.152512669219142E-4]:5.2032308468153365,7[&rate=2.1356820016187487E-4]:5.2032308468153365)[&rate=3.9194704730671895E-4]:6.649019355998896)[&rate=3.5700434597334797E-4]:8.792346243911929,(8[&rate=4.750563489746233E-4]:14.646425552972707,((9[&rate=7.726856166578248E-4]:0.49655294658024235,10[&rate=5.560403022533492E-4]:0.49655294658024235)[&rate=8.432585245331395E-4]:10.698581925547376,11[&rate=0.0012651824169405636]:11.19513487212762)[&rate=3.740488608113261E-4]:3.451290680845087)[&rate=5.265926165086364E-4]:5.998170893753455)[&rate=2.2684545714063789E-4]:24.901980969742702)[&rate=2.2684545714063789E-4]:37.02700444016692)[&rate=0.0010610434619889488]:1.0264181433642108,13[&rate=8.432585245331395E-4]:0.0)[&rate=5.265926165086364E-4]:9.18664771026728)[&rate=5.886697957245583E-4]:4.923663023957218,20[&rate=5.265926165086364E-4]:97.71031073422449)[&rate=3.740488608113261E-4]:1.7248802581028002,19[&rate=1.4293222771732256E-4]:99.43519099232729)[&rate=1.0]:0.0;
tree STATE_1470000 = (((((((1[&rate=2.502434338849866E-4]:27.145310026565355,17[&rate=2.036051222584435E-4]:17.145310026565355)[&rate=1.4330798210222283E-4]:2.5424910741502202,15[&rate=7.646000365901192E-4]:19.687801100715575)[&rate=2.4195780452269976E-4]:12.152266555826372,(14[&rate=2.7713147527121053E-4]:19.64917910492953,18[&rate=2.339293151466254E-4]:5.449179104929527)[&rate=2.1848240731146837E-4]:6.090888551612423)[&rate=2.67774635971711E-4]:4.309894375312595,(2[&rate=1.6697254683388334E-4]:24.527323305081794,3[&rate=1.2494868065663522E-4]:29.427323305081792)[&rate=2.588318262765888E-4]:11.622638726772749)[&rate=1.139817766933743E-4]:2.765339253370371,((((4[&rate=1.817335482230821E-4]:31.465644753022563,5[&rate=1.817335482230821E-4]:31.465644753022563)[&rate=1.5937508337860536E-4]:32.31234457976558,((((6[&rate=2.7713147527121053E-4]:4.933873649034685,7[&rate=5.312108094429483E-4]:4.933873649034685)[&rate=7.918957489076206E-5]:4.6532408506901275,11[&rate=1.139817766933743E-4]:9.587114499724812)[&rate=3.799110285965869E-4]:24.961555350582948,((8[&rate=1.9629220995793188E-4]:0.459304553604162,10[&rate=2.588318262765888E-4]:0.459304553604162)[&rate=3.2033645336980703E-4]:1.5141355332546693,9[&rate=1.8901486615740761E-4]:1.9734400868588313)[&rate=3.995899760772864E-4]:32.57522976344893)[&rate=5.312108094429483E-4]:6.14229309654452,12[&rate=1.4330798210222283E-4]:40.69096294685228)[&rate=1.6697254683388334E-4]:23.087026385935857)[&rate=6.031684283154892E-4]:2.222010667211862,16[&rate=1.5937508337860536E-4]:0.0)[&rate=2.1848240731146837E-4]:35.24891621489007,13[&rate=3.995899760772864E-4]:17.64891621489008)[&rate=2.339293151466254E-4]:3.66638507033484)[&rate=2.8697240826403226E-4]:11.37122575922838,20[&rate=4.845857638579028E-4]:116.2865270444533)[&rate=1.5152620306802146E-4]:2.971239564461726,19[&rate=1.2494868065663522E-4]:119.25776660891502)[&rate=1.0]:0.0;
tree STATE_1485000 = (((((((1[&rate=3.701852471004377E-4]:10.0,16[&rate=8.048653265059783E-4]:0.0)[&rate=2.658857191749141E-4]:3.8899503714260817,(((4[&rate=3.321087588408206E-4]:24.847314585602085,5[&rate=6.669512623968105E-4]:24.847314585602085)[&rate=2.901028986981393E-4]:26.34011437922824,((((6[&rate=2.577350311412584E-4]:8.968289594929754,7[&rate=2.7396711656702634E-4]:8.968289594929754)[&rate=3.233633873853859E-4]:7.66920975785721,12[&rate=2.7396711656702634E-4]:16.637499352786964)[&rate=5.287856843529283E-4]:7.5860674223099025,(8[&rate=3.06467599435578E-4]:15.553774100590546,11[&rate=2.494612235991987E-4]:15.553774100590546)[&rate=3.148299610149912E-4]:8.66979267450632)[&rate=2.9823772663162984E-4]:12.118331899065875,(9[&rate=4.623646634923616E-4]:5.165628588197654,10[&rate=3.233633873853859E-4]:5.165628588197654)[&rate=4.039021485335049E-4]:31.176270085965086)[&rate=3.411105248461734E-4]:14.845530290667583)[&rate=5.287856843529283E-4]:14.812571035169675,15[&rate=2.7396711656702634E-4]:0.0)[&rate=2.3226648080751982E-4]:3.8899503714260817)[&rate=6.030701618029578E-4]:2.2100496285739126,14[&rate=3.5041816308447503E-4]:0.0)[&rate=2.030913778812651E-4]:14.200000000000003,18[&rate=2.494612235991987E-4]:0.0)[&rate=3.919879676977599E-4]:2.1422201836776225,((2[&rate=2.3226648080751982E-4]:13.73325436360659,(3[&rate=4.039021485335049E-4]:12.850994387093259,17[&rate=3.321087588408206E-4]:7.95099438709326)[&rate=4.8124624734294523E-4]:5.7822599765133305)[&rate=3.411105248461734E-4]:3.8667456363934036,13[&rate=2.3226648080751982E-4]:0.0)[&rate=6.030701618029578E-4]:4.842220183677625)[&rate=2.1350614630306322E-4]:3.3383043927589426,20[&rate=5.287856843529283E-4]:91.78052457643656)[&rate=1.7807515616103753E-4]:3.006424476263632,19[&rate=1.6101898188661034E-4]:94.7869490527002)[&rate=1.0]:0.0;
tree STATE_1500000 = ((((((1[&rate=2.1215982362654952E-4]:49.59909341361582,18[&rate=3.0656340582797494E-4]:19.29909341361582)[&rate=3.401385801367452E-4]:1.791691890148158,13[&rate=1.9559549978649267E-4]:23.790785303763982)[&rate=1.7846676686940048E-4]:0.3243312882847391,((2[&rate=4.611325184975165E-4]:24.869422956900024,(((4[&rate=2.3475955131771332E-4]:56.114690328036836,(5[&rate=2.2329992431069744E-4]:49.72301440595019,12[&rate=3.16589983257328E-4]:49.72301440595019)[&rate=3.0656340582797494E-4]:6.391675922086648)[&rate=1.594040832029692E-4]:5.805911759744625,(((6[&rate=2.5302646612883887E-4]:5.376840878391215,(7[&rate=1.028262635871792E-4]:3.1383400362106415,8[&rate=2.289769081658994E-4]:3.1383400362106415)[&rate=1.594040832029692E-4]:2.238500842180574)[&rate=2.5953190742634714E-4]:19.440799221146648,11[&rate=2.888654943331921E-4]:24.81764009953786)[&rate=2.4675322585034103E-4]:20.62446604788051,(9[&rate=2.809112192584712E-4]:13.869473478414694,10[&rate=1.2252614697238554E-4]:13.869473478414694)[&rate=3.0656340582797494E-4]:31.572632669003678)[&rate=3.16589983257328E-4]:16.47849594036309)[&rate=1.8999802268431442E-4]:18.292253359679904,15[&rate=2.0664581060902975E-4]:14.212855447461365)[&rate=1.7242856104541333E-4]:10.65656750943866)[&rate=2.9737567758297243E-4]:11.632256749137852,((14[&rate=2.9737567758297243E-4]:0.0,16[&rate=2.0664581060902975E-4]:6.099999999999994)[&rate=2.888654943331921E-4]:8.063891172265514,17[&rate=2.4067515216327564E-4]:14.163891172265508)[&rate=1.9559549978649267E-4]:22.33778853377237)[&rate=3.2767651943863343E-4]:5.2134368860108395)[&rate=2.66312394917086E-4]:2.645735578494893,3[&rate=2.289769081658994E-4]:49.26085217054361)[&rate=1.9559549978649267E-4]:0.5260226439992124,20[&rate=4.611325184975165E-4]:110.88687481454282)[&rate=2.888654943331921E-4]:18.24148407110546,19[&rate=1.028262635871792E-4]:129.12835888564828)[&rate=1.0]:0.0;
tree STATE_1515000 = (((((((1[&rate=4.621550064388653E-4]:12.578896790228953,16[&rate=4.1102787639315695E-4]:2.578896790228953)[&rate=2.5882980177648356E-4]:3.5211032097710415,14[&rate=2.990560440114108E-4]:0.0)[&rate=2.5882980177648356E-4]:7.031890776831688,((3[&rate=3.232339249447014E-4]:16.404557437466785,17[&rate=1.8305557310525667E-4]:11.504557437466786)[&rate=5.978482206689304E-4]:0.26314426932731294,15[&rate=3.1471634708607563E-4]:11.7677017067941)[&rate=2.8477155291321E-4]:1.3641890700375825)[&rate=2.5882980177648356E-4]:7.168109223168315,18[&rate=4.621550064388653E-4]:0.0)[&rate=1.661487298283416E-4]:4.613295893639716,((2[&rate=2.990560440114108E-4]:0.8820964177604935,(4[&rate=2.5882980177648356E-4]:39.221836857492214,((((5[&rate=2.990560440114108E-4]:0.7631079618393675,12[&rate=2.6507782681637075E-4]:0.7631079618393675)[&rate=3.7790440393222326E-4]:11.52846936838271,(6[&rate=3.5284367679526294E-4]:6.855199826063185,7[&rate=2.5268924095455915E-4]:6.855199826063185)[&rate=2.714625678629039E-4]:5.436377504158893)[&rate=3.232339249447014E-4]:5.660931577903389,11[&rate=3.232339249447014E-4]:17.952508908125466)[&rate=3.646518896983321E-4]:9.769969973883835,((8[&rate=2.2262114833212742E-4]:4.018645054684127,9[&rate=2.1031401644504405E-4]:4.018645054684127)[&rate=1.4233006756908135E-4]:3.461931823329624,10[&rate=3.232339249447014E-4]:7.480576878013751)[&rate=3.421488912979475E-4]:20.241902003995552)[&rate=3.9309760599156397E-4]:11.499357975482912)[&rate=3.646518896983321E-4]:27.66025956026828)[&rate=4.3309815022621616E-4]:16.7179035822395,13[&rate=4.1102787639315695E-4]:0.0)[&rate=2.1652431158903385E-4]:7.313295893639719)[&rate=3.646518896983321E-4]:2.4567453993870885,20[&rate=5.055762902393355E-4]:93.3700412930268)[&rate=3.0668340387770844E-4]:1.5301209648698944,19[&rate=1.661487298283416E-4]:94.9001622578967)[&rate=1.0]:0.0;
tree STATE_1530000 = (((((((1[&rate=3.081454533332967E-4]:10.0,15[&rate=1.4636983330995647E-4]:0.0)[&rate=2.589323585776004E-4]:10.101075099953718,16[&rate=1.7379771062611956E-4]:10.101075099953718)[&rate=4.390198469234818E-4]:0.9936856498513862,(((4[&rate=7.928254443407781E-5]:10.060751894892313,(5[&rate=2.8650616005156966E-4]:3.5842372627832573,12[&rate=5.398933382782397E-4]:3.5842372627832573)[&rate=1.5352334077108849E-4]:6.476514632109056)[&rate=2.3513003978633008E-4]:38.84982516542896,((6[&rate=2.42747466105615E-4]:8.883926804198337,(7[&rate=4.7882812388008684E-4]:4.0498437197296555,8[&rate=2.2776747019581927E-4]:4.0498437197296555)[&rate=1.1184592478654511E-4]:4.8340830844686815)[&rate=5.398933382782397E-4]:9.848745838453274,((9[&rate=1.7379771062611956E-4]:4.203232323458369,10[&rate=2.676114403689274E-4]:4.203232323458369)[&rate=6.754951510632308E-4]:8.515836905833774,11[&rate=9.919547164624306E-5]:12.719069229292144)[&rate=3.203679261889885E-4]:6.013603413359467)[&rate=2.2062011681668364E-4]:30.177904417669662)[&rate=2.969176519487698E-4]:23.18942293967872,14[&rate=3.658880598419851E-4]:0.0)[&rate=2.1365206042758987E-4]:4.99476074980511)[&rate=1.8036978932601521E-4]:15.441842783553824,((2[&rate=1.8036978932601521E-4]:17.599999999999994,13[&rate=3.8568231041008185E-4]:0.0)[&rate=1.2198759282631935E-4]:2.700000000000003,18[&rate=9.919547164624306E-5]:0.0)[&rate=6.754951510632308E-4]:6.236603533358931)[&rate=7.928254443407781E-5]:0.36047548721136025,(3[&rate=9.919547164624306E-5]:25.484992172848187,17[&rate=3.33823101580655E-4]:20.58499217284819)[&rate=3.488392974005697E-4]:6.3120868477220995)[&rate=1.7379771062611956E-4]:1.070047584071986,20[&rate=4.7882812388008684E-4]:93.96712660464227)[&rate=2.7677356746370527E-4]:20.080537475368374,19[&rate=1.308211263439457E-4]:114.04766408001065)[&rate=1.0]:0.0;
tree STATE_1545000 = (((((((1[&rate=3.2108278813015693E-4]:22.510295545195405,(((4[&rate=5.724650447240615E-5]:4.8144790193158284,12[&rate=2.895380716699908E-4]:4.8144790193158284)[&rate=2.174232268404288E-4]:3.6247764413939754,5[&rate=1.626095279643534E-4]:8.439255460709804)[&rate=2.2565772825563227E-4]:49.59776711672245,((6[&rate=1.6876806220932048E-4]:23.224111265233393,(7[&rate=1.0068984837113271E-4]:10.720870238488743,(8[&rate=7.37009524534755E-5]:1.4605151260590938,11[&rate=3.2108278813015693E-4]:1.4605151260590938)[&rate=1.387023900778805E-4]:9.26035511242965)[&rate=1.0769108799682696E-4]:12.50324102674465)[&rate=1.626095279643534E-4]:24.757538503816587,(9[&rate=1.3275056857502154E-4]:12.215584488040546,10[&rate=1.8150833693213056E-4]:12.215584488040546)[&rate=3.0426468083118364E-4]:35.76606528100943)[&rate=4.978781881593762E-4]:10.055372808382273)[&rate=2.6455273519478074E-4]:20.47327296776315)[&rate=2.0961148476187827E-4]:5.466910548797799,16[&rate=1.4463031718308744E-4]:17.977206093993203)[&rate=2.3438754696747025E-4]:0.15915256594199434,((14[&rate=1.565530982678415E-4]:0.0,17[&rate=1.505699370601592E-4]:6.099999999999994)[&rate=2.0216204552013116E-4]:7.592816021302781,15[&rate=1.626095279643534E-4]:13.692816021302775)[&rate=2.7641385695775534E-4]:4.443542638632422)[&rate=1.3275056857502154E-4]:4.003954193714165,(2[&rate=4.978781881593762E-4]:17.599999999999994,13[&rate=2.174232268404288E-4]:0.0)[&rate=1.9502364509173028E-4]:4.540312853649368)[&rate=1.9502364509173028E-4]:7.7148725356965,(3[&rate=1.565530982678415E-4]:25.199999999999996,18[&rate=1.881520400046746E-4]:0.0)[&rate=3.407347567538537E-4]:9.555185389345866)[&rate=3.0426468083118364E-4]:4.869330696834737,20[&rate=4.3485773009307316E-4]:100.7245160861806)[&rate=1.505699370601592E-4]:2.5457688410078987,19[&rate=2.0216204552013116E-4]:103.2702849271885)[&rate=1.0]:0.0;
tree STATE_1560000 = (((((1[&rate=4.437033519026959E-4]:34.68646224043951,18[&rate=3.437541152790787E-4]:4.3864622404395135)[&rate=2.602204204243265E-4]:3.240615519932774,((2[&rate=1.5574766307553306E-4]:17.295406099984618,(3[&rate=3.437541152790787E-4]:20.464389114292622,17[&rate=4.0741721010945314E-4]:15.564389114292624)[&rate=5.147770663600379E-4]:1.7310169856919941)[&rate=4.7435122490622236E-4]:1.2125469239550597,((((4[&rate=2.131590510067315E-4]:34.805415653506245,5[&rate=2.602204204243265E-4]:34.805415653506245)[&rate=4.437033519026959E-4]:15.725803390430414,((((6[&rate=3.6014873321686463E-4]:3.596186746142045,7[&rate=2.4340755691867056E-4]:3.596186746142045)[&rate=2.9827336258209965E-4]:1.8419143610125492,12[&rate=2.833966506834204E-4]:5.438101107154594)[&rate=1.8335387722712534E-4]:11.661521131380283,8[&rate=4.581511075842099E-4]:17.099622238534877)[&rate=2.681347955115298E-4]:25.10135302239707,(9[&rate=1.8335387722712534E-4]:6.875054830179456,(10[&rate=3.68761415380931E-4]:6.721102277619724,11[&rate=4.0741721010945314E-4]:6.721102277619724)[&rate=5.147770663600379E-4]:0.1539525525597325)[&rate=3.056760095001118E-4]:35.32592043075249)[&rate=4.581511075842099E-4]:8.330243783004711)[&rate=1.8335387722712534E-4]:15.468780956063341,15[&rate=4.0741721010945314E-4]:0.0)[&rate=4.92905127021197E-4]:8.114235542460449,(14[&rate=4.3060682428602446E-4]:0.0,16[&rate=3.437541152790787E-4]:6.099999999999994)[&rate=5.416644155173885E-4]:2.0142355424604546)[&rate=3.518289762447737E-4]:10.393717481479229)[&rate=2.520143918992498E-4]:9.419124736432607)[&rate=3.68761415380931E-4]:8.220294739507025,13[&rate=4.0741721010945314E-4]:18.547372499879316)[&rate=3.8709682881595534E-4]:1.6541170576250863,20[&rate=4.92905127021197E-4]:103.8014895575044)[&rate=2.3424522579745273E-4]:0.34679496089847817,19[&rate=1.5574766307553306E-4]:104.14828451840287)[&rate=1.0]:0.0;
tree STATE_1575000 = (((((1[&rate=2.6407082977384126E-4]:30.299999999999997,18[&rate=4.152546312951586E-4]:0.0)[&rate=2.8122355453169914E-4]:0.9089903424798962,((((4[&rate=2.398160993441883E-4]:8.343494561100531,(5[&rate=6.393259222363103E-4]:1.3216957317532252,12[&rate=2.558288713186361E-4]:1.3216957317532252)[&rate=2.8122355453169914E-4]:7.021798829347306)[&rate=1.671309085419417E-4]:47.89587699589265,(((6[&rate=2.558288713186361E-4]:4.411325406965145,7[&rate=1.1987547596615211E-4]:4.411325406965145)[&rate=4.5855969966407606E-4]:0.928966001908381,8[&rate=1.671309085419417E-4]:5.340291408873526)[&rate=3.0933402007083055E-4]:29.20954877671079,((9[&rate=2.164154305749857E-4]:1.6845277341012161,11[&rate=2.725216219999746E-4]:1.6845277341012161)[&rate=3.0933402007083055E-4]:2.5148857553116546,10[&rate=4.152546312951586E-4]:4.199413489412871)[&rate=4.5855969966407606E-4]:30.350426696171446)[&rate=3.541313991426419E-4]:21.68953137140886)[&rate=4.5855969966407606E-4]:9.760628443006823,16[&rate=1.760612798558198E-4]:0.0)[&rate=1.671309085419417E-4]:19.607244977839287,((14[&rate=1.845602515895901E-4]:4.958465384949818,15[&rate=1.671309085419417E-4]:11.058465384949812)[&rate=3.6735915597124405E-4]:2.4641356779246166,17[&rate=3.9758924803622855E-4]:13.522601062874429)[&rate=3.4185999947830645E-4]:6.0846439149648575)[&rate=7.977550381852523E-4]:1.6017453646406068)[&rate=1.671309085419417E-4]:2.8850615716814474,((2[&rate=1.760612798558198E-4]:0.0,3[&rate=3.4185999947830645E-4]:4.899999999999999)[&rate=2.8122355453169914E-4]:17.599999999999994,13[&rate=2.2418387451744062E-4]:0.0)[&rate=2.0075719249348906E-4]:6.494051914161346)[&rate=2.0862280953078003E-4]:2.901962287621984,20[&rate=5.211655450560123E-4]:92.99601420178332)[&rate=3.0933402007083055E-4]:18.76968143191364,19[&rate=1.1987547596615211E-4]:111.76569563369696)[&rate=1.0]:0.0;
tree STATE_1590000 = ((((1[&rate=2.4247425783950545E-4]:16.3620801226689,(3[&rate=2.6118244993613755E-4]:4.899999999999999,16[&rate=1.8574098609662744E-4]:0.0)[&rate=4.6177183113521884E-4]:6.3620801226689)[&rate=1.3150210634737795E-4]:23.455044878709373,(((2[&rate=5.008414778094365E-4]:22.531464787553233,17[&rate=3.050510435412774E-4]:22.531464787553233)[&rate=8.896691233968641E-5]:0.00702865286446297,((((4[&rate=1.477710514279434E-4]:62.72667272271032,(5[&rate=1.477710514279434E-4]:48.03781879266905,((((6[&rate=2.8180658578647413E-4]:5.123512890819758,11[&rate=1.63134608279558E-4]:5.123512890819758)[&rate=2.7121706647555605E-4]:1.0973776928740753,7[&rate=1.781962134257879E-4]:6.2208905836938335)[&rate=2.0891193306328578E-4]:10.21984726599884,12[&rate=2.8180658578647413E-4]:16.440737849692674)[&rate=3.1796681056165695E-4]:17.871955714298323,((8[&rate=1.555209756890585E-4]:0.30999149343884197,10[&rate=1.1313056954663937E-4]:0.30999149343884197)[&rate=1.3980249592836382E-4]:4.174008292435798,9[&rate=3.050510435412774E-4]:4.48399978587464)[&rate=2.8180658578647413E-4]:29.828693778116357)[&rate=3.643269429484963E-4]:13.725125228678053)[&rate=2.0891193306328578E-4]:14.688853930041269)[&rate=1.781962134257879E-4]:3.273327277289681,15[&rate=3.643269429484963E-4]:0.0)[&rate=8.262379108416496E-4]:6.099999999999994,14[&rate=3.1796681056165695E-4]:0.0)[&rate=2.6118244993613755E-4]:14.200000000000003,18[&rate=3.3197750905722824E-4]:0.0)[&rate=6.857647282178661E-5]:2.238493440417699)[&rate=2.7121706647555605E-4]:0.15317704201565618,13[&rate=6.368713957479549E-4]:5.091670482433358)[&rate=2.010615950618484E-4]:7.12545451894492)[&rate=2.4247425783950545E-4]:3.302715053508848,20[&rate=4.6177183113521884E-4]:99.11984005488712)[&rate=2.010615950618484E-4]:30.675434423665124,19[&rate=1.0227931284875167E-4]:129.79527447855224)[&rate=1.0]:0.0;
tree STATE_1605000 = (((((((1[&rate=1.6858647367554657E-4]:13.036088918275127,16[&rate=2.3949487560550442E-4]:3.0360889182751265)[&rate=4.93197934909753E-4]:4.341212163922137,(((4[&rate=2.0823879645247986E-4]:7.0359381742910445,5[&rate=3.2669278996350575E-4]:7.0359381742910445)[&rate=7.640432123030635E-4]:2.4568367775131756,8[&rate=1.0240421985777695E-4]:9.49277495180422)[&rate=1.4851696501659217E-4]:47.00146563711675,(((6[&rate=4.3845072065234596E-4]:7.814940843898219,7[&rate=1.982157585459096E-4]:7.814940843898219)[&rate=2.6183955546077865E-4]:10.751658406662218,11[&rate=3.123651225312842E-4]:18.566599250560436)[&rate=2.1842593842864077E-4]:20.024698324502204,((9[&rate=2.9881371038779084E-4]:3.598270147693492,10[&rate=1.6858647367554657E-4]:3.598270147693492)[&rate=1.5864066646556797E-4]:13.573928240544499,12[&rate=6.364902909825686E-5]:17.17219838823799)[&rate=2.1842593842864077E-4]:21.41909918682465)[&rate=6.776784090763073E-4]:17.902943013858334)[&rate=2.3949487560550442E-4]:16.88306049327629)[&rate=2.736345346095017E-4]:7.774786902871085,2[&rate=1.6858647367554657E-4]:15.152087985068349)[&rate=4.641015817443596E-4]:14.540040147946584,((13[&rate=1.3808751207712602E-4]:2.4707510252914773,(14[&rate=1.8830466331218592E-4]:0.0,15[&rate=3.5820493507498987E-4]:6.099999999999994)[&rate=6.152672315089619E-4]:13.970751025291477)[&rate=5.666062623376467E-4]:4.023303449081993,17[&rate=1.8830466331218592E-4]:24.094054474373465)[&rate=2.50480106291921E-4]:5.598073658641468)[&rate=1.982157585459096E-4]:0.04223321236980837,(3[&rate=2.736345346095017E-4]:25.199999999999996,18[&rate=2.1842593842864077E-4]:0.0)[&rate=2.3949487560550442E-4]:9.434361345384744)[&rate=1.0240421985777695E-4]:1.5825617087761827,20[&rate=5.268169133727179E-4]:97.31692305416092)[&rate=1.1545483528119164E-4]:15.535958519638811,19[&rate=1.271662865932839E-4]:112.85288157379973)[&rate=1.0]:0.0;
tree STATE_1620000 = ((((((((1[&rate=2.839027150739362E-4]:10.0,15[&rate=5.908677794044759E-4]:0.0)[&rate=2.601670765917028E-4]:5.746625751219582,(16[&rate=2.357789706975407E-4]:4.100739016147315,17[&rate=3.250806523986999E-4]:4.100739016147315)[&rate=2.601670765917028E-4]:1.645886735072267)[&rate=4.713397923577665E-4]:0.4119021279173012,(3[&rate=4.926721815130643E-4]:10.999999999999993,14[&rate=2.839027150739362E-4]:0.0)[&rate=2.0884126043492067E-4]:0.05852787913688928)[&rate=6.535608725285136E-4]:9.048190191941089,2[&rate=2.839027150739362E-4]:15.206718071077972)[&rate=2.272221060415204E-4]:3.9090467240250604,((4[&rate=3.9547770884892865E-4]:40.558147582042714,(((5[&rate=1.873069980243559E-4]:7.713609006888835,12[&rate=5.179781574030006E-4]:7.713609006888835)[&rate=2.9994381601041316E-4]:13.508692352883301,((6[&rate=2.357789706975407E-4]:8.023587952802059,7[&rate=1.3041558070019308E-4]:8.023587952802059)[&rate=3.837937700554E-4]:8.070689203088188,(8[&rate=2.839027150739362E-4]:0.5508175629648633,11[&rate=2.182932165640545E-4]:0.5508175629648633)[&rate=2.9994381601041316E-4]:15.543459592925384)[&rate=2.9187650800820787E-4]:5.128024203881889)[&rate=2.7598569384275964E-4]:4.761623276276623,(9[&rate=2.4407110792336987E-4]:8.343205547110117,10[&rate=3.430318408859556E-4]:8.343205547110117)[&rate=5.493135892073362E-4]:17.640719088938642)[&rate=3.9547770884892865E-4]:14.574222945993956)[&rate=2.601670765917028E-4]:43.04185241795728,13[&rate=3.837937700554E-4]:0.0)[&rate=3.728101914841687E-4]:1.5157647951030384)[&rate=4.215586197146877E-4]:1.1842352048969644,18[&rate=2.839027150739362E-4]:0.0)[&rate=3.081413483180749E-4]:2.6725924989500385,20[&rate=4.5281808694093E-4]:88.97259249895004)[&rate=1.7413418526918402E-4]:22.318389540968482,19[&rate=1.3041558070019308E-4]:111.29098203991852)[&rate=1.0]:0.0;
tree STATE_1635000 = (((((((1[&rate=2.1593473771196013E-4]:10.0,16[&rate=2.793861211173324E-4]:0.0)[&rate=2.4645858549619305E-4]:9.287161663250544,17[&rate=5.158715735296502E-4]:9.287161663250544)[&rate=3.7764092830852575E-4]:10.159089721062983,(((4[&rate=2.3093877399852999E-4]:40.346938600312214,(((5[&rate=3.349794836376907E-4]:6.0689794732881115,(6[&rate=4.833864825271836E-4]:1.8034226449076924,7[&rate=4.5371200873275616E-4]:1.8034226449076924)[&rate=2.1593473771196013E-4]:4.265556828380419)[&rate=0.0013561448137040825]:2.6772018795181793,8[&rate=0.0011517664192176639]:8.74618135280629)[&rate=0.0016998468950457529]:6.489727284897663,((9[&rate=1.319905963133564E-4]:4.397656200662183,12[&rate=4.5971267046239435E-5]:4.397656200662183)[&rate=2.3093877399852999E-4]:0.8861967554297658,(10[&rate=2.1593473771196013E-4]:5.059402924868743,11[&rate=0.0011517664192176639]:5.059402924868743)[&rate=0.002591504572014517]:0.22445003122320628)[&rate=0.0013561448137040825]:9.952055681612006)[&rate=2.9698088933218143E-4]:25.11102996260826)[&rate=3.349794836376907E-4]:25.653061399687786,15[&rate=0.0013561448137040825]:0.0)[&rate=1.4574886149309603E-4]:6.099999999999994,14[&rate=6.878141138402764E-4]:0.0)[&rate=1.1798171944763984E-4]:13.346251384313533)[&rate=1.319905963133564E-4]:0.8537486156864702,18[&rate=4.5971267046239435E-5]:0.0)[&rate=1.0343655340511846E-4]:1.1537857282884687,((2[&rate=0.0010097729486346547]:9.593638599015321,3[&rate=2.793861211173324E-4]:14.49363859901532)[&rate=2.625779050115516E-4]:8.006361400984673,13[&rate=3.7764092830852575E-4]:0.0)[&rate=2.793861211173324E-4]:3.8537857282884715)[&rate=7.471943965503319E-4]:0.2638435628553282,20[&rate=5.916335040888283E-4]:87.7176292911438)[&rate=2.625779050115516E-4]:13.97669064539501,19[&rate=1.1798171944763984E-4]:101.6943199365388)[&rate=1.0]:0.0;
tree STATE_1650000 = (((((((1[&rate=5.204520527997871E-4]:10.0,15[&rate=1.7111667989133466E-4]:0.0)[&rate=1.2652866930887803E-4]:14.09199187772714,3[&rate=4.2747159261065425E-4]:18.991991877727138)[&rate=1.4282081670637746E-4]:3.22451831568938,(2[&rate=1.5745657134118537E-4]:12.780145946896937,((14[&rate=4.480317592207021E-4]:0.0,16[&rate=1.7111667989133466E-4]:6.099999999999994)[&rate=1.8417155190306408E-4]:0.48541762148992973,17[&rate=4.480317592207021E-4]:6.585417621489924)[&rate=7.827944461417368E-5]:6.194728325407013)[&rate=3.2650103276139937E-4]:4.536364246519582)[&rate=7.827944461417368E-5]:2.983489806583478,18[&rate=3.568512229623274E-4]:0.0)[&rate=3.413555151934972E-4]:2.1824310224480428,((4[&rate=4.0825035559825806E-4]:25.307907069398198,(((5[&rate=2.2168663166173712E-4]:6.173492581209,(9[&rate=2.718850406355439E-4]:0.2990143684140309,11[&rate=1.070153160955043E-4]:0.2990143684140309)[&rate=2.590838586113646E-4]:5.874478212794969)[&rate=0.0015561318001441021]:0.03352211977565123,10[&rate=1.4282081670637746E-4]:6.207014700984651)[&rate=9.627314799649728E-4]:11.751859710678978,((6[&rate=9.627314799649728E-4]:2.188902726896897,7[&rate=4.480317592207021E-4]:2.188902726896897)[&rate=6.188047975824454E-4]:5.922934420561214,(8[&rate=7.827944461417368E-5]:3.982017299833708,12[&rate=3.1220122169059775E-4]:3.982017299833708)[&rate=1.2652866930887803E-4]:4.129819847624403)[&rate=6.614112320986975E-4]:9.847037264205518)[&rate=6.614112320986975E-4]:7.349032657734568)[&rate=1.5745657134118537E-4]:58.2920929306018,13[&rate=3.901750685090395E-4]:0.0)[&rate=3.7308651685262354E-4]:4.882431022448046)[&rate=1.8417155190306408E-4]:3.5465699146467244,20[&rate=5.204520527997871E-4]:92.02900093709476)[&rate=3.7308651685262354E-4]:5.523480022589126,19[&rate=1.7111667989133466E-4]:97.55248095968389)[&rate=1.0]:0.0;
tree STATE_1665000 = (((((1[&rate=2.7031020612464004E-4]:29.64372411818752,(((((((4[&rate=3.060023868391822E-4]:30.30913847390133,(5[&rate=1.4677452107096124E-4]:6.7237273402653805,12[&rate=3.1986230162648114E-4]:6.7237273402653805)[&rate=9.542883358447739E-5]:23.58541113363595)[&rate=9.542883358447739E-5]:12.31692602957293,8[&rate=3.708977687049112E-4]:42.62606450347426)[&rate=1.3155671619849798E-4]:10.431483436940795,((6[&rate=2.598807392505158E-4]:4.815594680953021,7[&rate=1.6880070943422072E-4]:4.815594680953021)[&rate=2.5000803933892727E-4]:29.912709583848503,(9[&rate=1.2353924164403197E-4]:2.103001798859818,(10[&rate=4.88013084310523E-4]:1.9601938704175905,11[&rate=1.1505451312193303E-4]:1.9601938704175905)[&rate=3.519236146036945E-4]:0.14280792844222767)[&rate=3.519236146036945E-4]:32.6253024659417)[&rate=4.181134617602219E-4]:18.329243675613533)[&rate=1.8356435603750102E-4]:12.942452059584944,16[&rate=1.4677452107096124E-4]:0.0)[&rate=8.161555635701276E-4]:2.4622865705458565,15[&rate=3.708977687049112E-4]:2.4622865705458565)[&rate=1.1505451312193303E-4]:3.637713429454138,14[&rate=2.3162967628213434E-4]:0.0)[&rate=1.6148642626644087E-4]:4.297313696829505,17[&rate=4.88013084310523E-4]:10.3973136968295)[&rate=1.910894180710343E-4]:9.246410421358021)[&rate=8.161555635701276E-4]:0.9477295681844993,(2[&rate=2.7031020612464004E-4]:20.299999999999997,18[&rate=9.542883358447739E-5]:0.0)[&rate=2.8139133926668395E-4]:0.29145368637202296)[&rate=1.8356435603750102E-4]:1.3388165558778127,(3[&rate=3.708977687049112E-4]:22.499999999999993,13[&rate=4.88013084310523E-4]:0.0)[&rate=9.542883358447739E-5]:4.3302702422498385)[&rate=1.0584433419443262E-4]:8.212629500662516,20[&rate=4.88013084310523E-4]:96.14289974291235)[&rate=1.1505451312193303E-4]:14.276767969828484,19[&rate=1.8356435603750102E-4]:110.41966771274083)[&rate=1.0]:0.0;
tree STATE_1680000 = ((((((1[&rate=2.7645757551984074E-4]:13.077217760189342,17[&rate=1.2534871945148844E-4]:3.077217760189342)[&rate=4.430552153674213E-4]:11.597986433464584,15[&rate=1.7173966319965697E-4]:14.675204193653926)[&rate=2.4769325033730807E-4]:14.054106059935918,((2[&rate=2.6650917281180534E-4]:16.288003739037222,((((4[&rate=2.2998127044721506E-4]:14.490733648983614,(5[&rate=2.868467497366396E-4]:8.407233555040698,11[&rate=6.036050578218984E-4]:8.407233555040698)[&rate=1.5455562441375195E-4]:6.0835000939429165)[&rate=2.5693928182065153E-4]:23.00948255991075,(((6[&rate=6.929041627103859E-4]:1.8331872216718144,7[&rate=2.7645757551984074E-4]:1.8331872216718144)[&rate=1.2534871945148844E-4]:5.480858934735924,12[&rate=3.214504879936617E-4]:7.314046156407738)[&rate=6.036050578218984E-4]:15.380182694839128,((8[&rate=2.6650917281180534E-4]:0.4526219721288575,10[&rate=1.2534871945148844E-4]:0.4526219721288575)[&rate=1.5455562441375195E-4]:3.7114791577051673,9[&rate=2.2998127044721506E-4]:4.164101129834025)[&rate=5.041062599925731E-4]:18.53012772141284)[&rate=5.462893897961402E-4]:14.8059873576475)[&rate=2.6650917281180534E-4]:28.499783791105635,16[&rate=2.387221592148112E-4]:0.0)[&rate=2.130240208633044E-4]:6.099999999999994,14[&rate=2.868467497366396E-4]:0.0)[&rate=7.638515946928676E-5]:10.188003739037228)[&rate=1.9649722433943406E-4]:4.011996260962775,18[&rate=4.707166826457644E-4]:0.0)[&rate=1.134461591623808E-4]:8.429310253589847)[&rate=2.387221592148112E-4]:12.83200415428935,(3[&rate=1.3583778043520028E-4]:33.76503028656348,13[&rate=2.868467497366396E-4]:11.265030286563487)[&rate=1.5455562441375195E-4]:12.696284121315713)[&rate=2.5693928182065153E-4]:4.757241602855913,20[&rate=3.987237088107783E-4]:112.31855601073511)[&rate=6.929041627103859E-4]:3.952853951620895,19[&rate=1.3583778043520028E-4]:116.271409962356)[&rate=1.0]:0.0;
tree STATE_1695000 = ((((((1[&rate=1.2071241244097384E-4]:19.20979187295316,((((((4[&rate=3.145011603763191E-4]:15.706512308584887,11[&rate=2.3227125906317872E-4]:15.706512308584887)[&rate=1.3664645201446026E-4]:7.308947574404229,(5[&rate=6.137246943116139E-4]:4.291997579199404,12[&rate=3.252223355680961E-4]:4.291997579199404)[&rate=3.145011603763191E-4]:18.723462303789713)[&rate=3.145011603763191E-4]:28.903337217376265,(((6[&rate=4.648271688402232E-4]:6.027772663190787,8[&rate=2.0695760313435771E-4]:6.027772663190787)[&rate=2.4071298815424362E-4]:0.7094536697136578,7[&rate=2.1544253069373713E-4]:6.737226332904445)[&rate=6.137246943116139E-4]:9.681679121371044,(9[&rate=1.4946388731478546E-4]:3.2404637120857203,10[&rate=9.577016885298505E-5]:3.2404637120857203)[&rate=5.610940776263699E-4]:13.178441742189769)[&rate=2.8487220669914915E-4]:35.49989164608989)[&rate=2.6665498432817817E-4]:14.081202899634619,16[&rate=3.7461871871552564E-4]:0.0)[&rate=4.228115334653766E-4]:6.099999999999994,14[&rate=2.8487220669914915E-4]:0.0)[&rate=3.252223355680961E-4]:2.921480540511965,15[&rate=3.145011603763191E-4]:9.02148054051196)[&rate=2.8487220669914915E-4]:0.18831133244120224)[&rate=2.1544253069373713E-4]:13.436383714454848,(13[&rate=1.2071241244097384E-4]:4.197679983447614,17[&rate=2.943892033662255E-4]:21.79767998344761)[&rate=2.1544253069373713E-4]:0.8484956039604015)[&rate=1.2071241244097384E-4]:0.008672228285135475,(2[&rate=1.3664645201446026E-4]:20.299999999999997,18[&rate=2.4071298815424362E-4]:0.0)[&rate=2.1544253069373713E-4]:2.354847815693148)[&rate=2.4071298815424362E-4]:1.2831276883995315,3[&rate=3.892606613991058E-4]:28.837975504092675)[&rate=2.4923057696579656E-4]:5.558767062747094,20[&rate=4.052197199872712E-4]:95.49674256683977)[&rate=2.7564309529581774E-4]:1.3757395718777587,19[&rate=1.6065683729733164E-4]:96.87248213871753)[&rate=1.0]:0.0;
tree STATE_1710000 = ((((1[&rate=2.499429200536652E-4]:30.730608521868604,18[&rate=2.657221223172856E-4]:0.43060852186860643)[&rate=3.238052391880287E-4]:0.42270489007080414,(((2[&rate=2.5512235486477373E-4]:6.493559355180452,16[&rate=3.64571167957799E-4]:6.493559355180452)[&rate=2.136690381932191E-4]:4.9288033737588535,(((4[&rate=2.499429200536652E-4]:51.40008372737051,(((5[&rate=2.023533053799219E-4]:4.247642326879361,12[&rate=3.32431945440108E-4]:4.247642326879361)[&rate=3.52499864503235E-4]:11.878565359830873,(6[&rate=2.397082611820677E-4]:11.057429923583062,((7[&rate=2.448125844232066E-4]:0.48044590883509725,11[&rate=3.32431945440108E-4]:0.48044590883509725)[&rate=2.9490758616900354E-4]:7.2631890251207345,8[&rate=3.0149373818458194E-4]:7.743634933955832)[&rate=1.652724740587671E-4]:3.3137949896272296)[&rate=3.9603544781541305E-4]:5.068777763127173)[&rate=2.886306616136231E-4]:21.410637084363263,(9[&rate=1.9627568968497126E-4]:5.113124765680218,10[&rate=2.023533053799219E-4]:5.113124765680218)[&rate=4.520013294224696E-4]:32.42372000539328)[&rate=2.9490758616900354E-4]:13.86323895629701)[&rate=3.787300945699526E-4]:17.52766498403205,17[&rate=1.7469939724051823E-4]:2.9277487114025575)[&rate=1.5306847461628718E-4]:4.923679726384094,(14[&rate=1.326456512559076E-4]:0.0,15[&rate=2.499429200536652E-4]:6.099999999999994)[&rate=2.768118176917202E-4]:1.7514284377866574)[&rate=2.6037408333137735E-4]:3.5709342911526534)[&rate=3.64571167957799E-4]:8.099291890532015,(3[&rate=3.084505364876513E-4]:22.499999999999993,13[&rate=1.326456512559076E-4]:0.0)[&rate=2.081242641336235E-4]:1.921654619471326)[&rate=2.886306616136231E-4]:1.6316587924680874)[&rate=1.9627568968497126E-4]:1.6258100328114011,20[&rate=4.520013294224696E-4]:88.77912344475081)[&rate=2.2948123047541793E-4]:3.202293767437496,19[&rate=1.8977681204685978E-4]:91.9814172121883)[&rate=1.0]:0.0;
tree STATE_1725000 = ((((((1[&rate=4.943585571835318E-4]:19.061673114780362,((4[&rate=3.042396348977751E-4]:40.147613337184765,((((5[&rate=1.4668539202868233E-4]:0.6412480768258149,12[&rate=2.3226795869485146E-4]:0.6412480768258149)[&rate=8.147774601806133E-4]:1.7071332100002443,6[&rate=4.2030716100939025E-4]:2.348381286826059)[&rate=2.9112428434711034E-4]:6.833191747249703,7[&rate=2.0017032782901218E-4]:9.181573034075763)[&rate=4.000319059821198E-4]:19.511217871549377,(8[&rate=5.254244497487375E-4]:16.49179164269476,((9[&rate=2.2141120409430482E-4]:4.799250835873764,10[&rate=1.4668539202868233E-4]:4.799250835873764)[&rate=3.6396079078042696E-4]:3.0458992141547547,11[&rate=4.000319059821198E-4]:7.8451500500285185)[&rate=3.179764348414839E-4]:8.646641592666242)[&rate=6.038198129662563E-4]:12.200999262930377)[&rate=6.038198129662563E-4]:11.454822431559627)[&rate=1.0870642636580436E-4]:32.054672522102805,(14[&rate=3.179764348414839E-4]:0.0,16[&rate=2.9112428434711034E-4]:6.099999999999994)[&rate=2.2141120409430482E-4]:0.10228585928757639)[&rate=2.107305185258599E-4]:2.8593872554927913)[&rate=2.3226795869485146E-4]:13.82040067792525,(2[&rate=5.254244497487375E-4]:10.973581364943172,(15[&rate=6.55799531073711E-4]:1.2640262476495678,17[&rate=1.7916458548680183E-4]:1.2640262476495678)[&rate=1.7916458548680183E-4]:9.709555117293604)[&rate=4.6697504712762337E-4]:11.90849242776244)[&rate=9.621500936936141E-4]:2.1166744276526117,(3[&rate=1.0870642636580436E-4]:25.199999999999996,18[&rate=9.2055851327335E-5]:0.0)[&rate=2.9112428434711034E-4]:4.698748220358226)[&rate=2.547253765834757E-4]:9.198828326399848,13[&rate=4.4248089584636023E-4]:16.597576546758077)[&rate=3.179764348414839E-4]:11.355198023054712,20[&rate=4.2030716100939025E-4]:111.55277456981278)[&rate=1.0870642636580436E-4]:0.6279997997705209,19[&rate=1.2259362656898067E-4]:112.1807743695833)[&rate=1.0]:0.0;
tree STATE_1740000 = ((((((((1[&rate=1.8815380946865442E-4]:10.265058147777324,((4[&rate=2.1302699783662092E-4]:58.40977851842135,((5[&rate=1.5354002638234856E-4]:4.888462767253046,12[&rate=1.8815380946865442E-4]:4.888462767253046)[&rate=2.6959101580882264E-4]:36.701581147852906,(((6[&rate=2.8566010074001493E-4]:1.5160431462186172,7[&rate=3.027252581637505E-4]:1.5160431462186172)[&rate=7.030403544554897E-4]:13.851818019887093,((8[&rate=5.856333544805114E-4]:4.75579162426127,10[&rate=2.6959101580882264E-4]:4.75579162426127)[&rate=8.899310281269475E-4]:1.2327320782338598,9[&rate=1.5354002638234856E-4]:5.988523702495129)[&rate=0.0010422153833169318]:9.37933746361058)[&rate=2.399611115100529E-4]:13.523434615374684,11[&rate=6.387615888892555E-4]:28.891295781480395)[&rate=3.843499458509136E-4]:12.698748133625557)[&rate=1.7631984704283263E-4]:16.819734603315396)[&rate=1.7631984704283263E-4]:7.590221481578652,16[&rate=8.899310281269475E-4]:0.0)[&rate=8.899310281269475E-4]:0.2650581477773244)[&rate=1.3150104266664343E-4]:4.151680201294113,15[&rate=1.8815380946865442E-4]:4.416738349071437)[&rate=2.2619982545598702E-4]:15.88326165092856,18[&rate=1.3150104266664343E-4]:0.0)[&rate=8.899310281269475E-4]:1.152055788732767,(3[&rate=7.030403544554897E-4]:22.499999999999993,13[&rate=1.6480305577834043E-4]:0.0)[&rate=4.6729349993443876E-4]:3.8520557887327698)[&rate=2.5439369414260803E-4]:4.250526902622852,(2[&rate=2.8566010074001493E-4]:24.168523460147284,17[&rate=2.2619982545598702E-4]:24.168523460147284)[&rate=2.5439369414260803E-4]:1.5340592312083317)[&rate=0.001949505455942154]:1.1818361236023947,14[&rate=5.405672932175973E-4]:20.784418814958016)[&rate=3.843499458509136E-4]:4.750945945910885,20[&rate=5.015721212837091E-4]:97.6353647608689)[&rate=4.6729349993443876E-4]:8.686806614324638,19[&rate=1.0954050680945214E-4]:106.32217137519353)[&rate=1.0]:0.0;
tree STATE_1755000 = (((((1[&rate=4.5449811177341546E-4]:27.204669831341576,(2[&rate=5.899573798205358E-4]:8.628511461074837,3[&rate=2.2890900118466157E-4]:13.528511461074835)[&rate=1.957924227800398E-4]:8.57615837026674)[&rate=3.053108145670222E-4]:0.9155425424382173,17[&rate=1.8693966360177185E-4]:18.120212373779793)[&rate=1.676512524872332E-4]:6.840141168088223,((((4[&rate=2.0432684245922945E-4]:62.190964653605704,(((5[&rate=8.236286513117876E-4]:2.2375331133613012,12[&rate=3.053108145670222E-4]:2.2375331133613012)[&rate=5.899573798205358E-4]:25.076720359693283,((6[&rate=3.847703448083413E-4]:9.434901388940032,7[&rate=3.053108145670222E-4]:9.434901388940032)[&rate=1.7762898910829322E-4]:4.2830945944974985,11[&rate=4.339479685483749E-4]:13.71799598343753)[&rate=1.957924227800398E-4]:13.596257489617054)[&rate=3.7116812219202484E-4]:11.761950795251131,((8[&rate=4.783212726091902E-4]:2.6506374655528675,9[&rate=5.899573798205358E-4]:2.6506374655528675)[&rate=3.585409037764289E-4]:0.6276939247102482,10[&rate=2.697590301659996E-4]:3.2783313902631157)[&rate=3.1496155687644393E-4]:35.7978728780426)[&rate=3.4672448215826673E-4]:23.114760385299988)[&rate=1.7762898910829322E-4]:15.885553271332128,15[&rate=2.369707981088335E-4]:12.076517924937832)[&rate=5.899573798205358E-4]:8.223482075062165,18[&rate=2.0432684245922945E-4]:0.0)[&rate=5.899573798205358E-4]:1.3937398806675105,(13[&rate=2.0432684245922945E-4]:0.0,(14[&rate=5.899573798205358E-4]:0.0,16[&rate=2.208167164360972E-4]:6.099999999999994)[&rate=2.5317780201787983E-4]:11.5)[&rate=4.783212726091902E-4]:4.093739880667513)[&rate=4.339479685483749E-4]:3.266613661200509)[&rate=4.1582262565191915E-4]:6.0514531255956,20[&rate=4.1582262565191915E-4]:97.01180666746362)[&rate=2.960162082936097E-4]:8.198203937120553,19[&rate=1.2819330695114663E-4]:105.21001060458417)[&rate=1.0]:0.0;
tree STATE_1770000 = ((((((1[&rate=2.9595033661562265E-4]:16.099999999999994,14[&rate=3.854741435115567E-4]:0.0)[&rate=3.503850688932742E-4]:15.829152555711076,2[&rate=1.5686460819045375E-4]:21.92915255571107)[&rate=2.056111913914631E-4]:3.7728815202615493,((3[&rate=2.3596269956543275E-4]:16.79409400367272,((15[&rate=3.213647144716127E-4]:5.9083155593499015,16[&rate=4.752938150708862E-4]:5.9083155593499015)[&rate=3.503850688932742E-4]:4.0617481950290255,17[&rate=4.3180884950199316E-4]:9.970063754378927)[&rate=2.28597343854097E-4]:1.9240302492937928)[&rate=3.305455472305764E-4]:9.824212474423007,((((4[&rate=3.305455472305764E-4]:19.16991570527122,12[&rate=3.6123517328297966E-4]:19.16991570527122)[&rate=3.854741435115567E-4]:3.9136117619297295,(5[&rate=2.802750790671847E-4]:9.183837415277935,(8[&rate=6.020674127942178E-4]:0.293592511336867,11[&rate=3.0412274594490934E-4]:0.293592511336867)[&rate=2.2112514704448214E-4]:8.890244903941069)[&rate=4.5169025138869836E-4]:13.899690051923013)[&rate=3.503850688932742E-4]:16.625075266606867,((6[&rate=5.045481724185545E-4]:2.0378388437158477,7[&rate=4.3180884950199316E-4]:2.0378388437158477)[&rate=2.8801462988888265E-4]:27.03911233478414,(9[&rate=3.305455472305764E-4]:4.899269324998534,10[&rate=2.28597343854097E-4]:4.899269324998534)[&rate=3.992643456212649E-4]:24.17768185350145)[&rate=4.3180884950199316E-4]:10.63165155530783)[&rate=1.5686460819045375E-4]:46.59139726619218,18[&rate=1.9739759100385304E-4]:0.0)[&rate=3.213647144716127E-4]:1.4183064780957295)[&rate=1.5686460819045375E-4]:3.983727597876893)[&rate=3.305455472305764E-4]:5.116493305483175,13[&rate=3.0412274594490934E-4]:13.2185273814558)[&rate=1.9739759100385304E-4]:3.067491305220017,20[&rate=4.5169025138869836E-4]:99.88601868667581)[&rate=2.2112514704448214E-4]:7.297641415764616,19[&rate=1.5686460819045375E-4]:107.18366010244043)[&rate=1.0]:0.0;
tree STATE_1785000 = ((((1[&rate=3.5131662869880955E-4]:40.86426597251224,((3[&rate=3.2620422447390677E-4]:7.426670734533452,15[&rate=3.8247831679250575E-4]:2.526670734533454)[&rate=4.5282876186171847E-4]:21.601544424681236,18[&rate=1.4747654399290257E-4]:3.828215159214693)[&rate=1.4747654399290257E-4]:6.7360508132975525)[&rate=2.77630445520015E-4]:4.021246723660298,((2[&rate=1.3822588404435846E-4]:23.152298915767844,(((4[&rate=2.862427155038061E-4]:8.617864517158079,(5[&rate=1.985959210516007E-4]:5.929563024976955,12[&rate=2.862427155038061E-4]:5.929563024976955)[&rate=2.3233540147765808E-4]:2.6883014921811244)[&rate=2.3934829356786868E-4]:33.13799542845793,((6[&rate=1.2754422618486714E-4]:8.372209999443355,7[&rate=1.9188180665040752E-4]:8.372209999443355)[&rate=3.8247831679250575E-4]:19.441841036175468,(((8[&rate=2.953121035697255E-4]:0.19743351425384897,10[&rate=4.244244829337784E-4]:0.19743351425384897)[&rate=1.3822588404435846E-4]:14.16085267359196,9[&rate=1.2754422618486714E-4]:14.358286187845808)[&rate=5.484847704009477E-4]:0.29084461341190604,11[&rate=3.381760504946749E-4]:14.649130801257714)[&rate=6.750497505147278E-4]:13.164920234361107)[&rate=4.244244829337784E-4]:13.941808909997189)[&rate=1.1411922318880881E-4]:41.844140054383985,13[&rate=2.5390007159803874E-4]:0.0)[&rate=2.6940645089365496E-4]:5.5522989157678495)[&rate=4.244244829337784E-4]:4.304882388927481,((14[&rate=2.77630445520015E-4]:1.2379146219373354,16[&rate=1.4747654399290257E-4]:7.33791462193733)[&rate=3.381760504946749E-4]:16.662857761955948,17[&rate=1.781659358421949E-4]:24.000772383893278)[&rate=1.7104811703332374E-4]:3.4564089208020476)[&rate=1.9188180665040752E-4]:7.428331391477215)[&rate=1.781659358421949E-4]:1.476951945195978,20[&rate=5.484847704009477E-4]:102.36246464136852)[&rate=1.985959210516007E-4]:4.110234743980854,19[&rate=1.2754422618486714E-4]:106.47269938534937)[&rate=1.0]:0.0;
tree STATE_1800000 = (((((1[&rate=3.997927178338957E-4]:25.467380257122073,2[&rate=4.373856046624353E-4]:15.467380257122073)[&rate=3.6797457410045394E-4]:2.4888724771805926,((3[&rate=3.2191634015906205E-4]:15.6017005769369,((14[&rate=4.852355383468992E-4]:0.0,15[&rate=6.993815780331718E-4]:6.099999999999994)[&rate=4.373856046624353E-4]:2.804452261191301,16[&rate=3.78106331783723E-4]:8.904452261191295)[&rate=2.3456516553922865E-4]:1.7972483157456054)[&rate=4.852355383468992E-4]:3.3937028461539853,(((4[&rate=5.882107313475725E-4]:15.486109258138598,5[&rate=4.2400647471788386E-4]:15.486109258138598)[&rate=2.2444608991173124E-4]:21.624490891050442,((((6[&rate=2.793755171895053E-4]:4.813787178568479,(7[&rate=2.532807618765266E-4]:0.34025120571728434,8[&rate=2.962961126651231E-4]:0.34025120571728434)[&rate=1.4040934001506269E-4]:4.473535972851194)[&rate=4.5186000896309367E-4]:1.6409616601522306,11[&rate=1.8727391911206698E-4]:6.454748838720709)[&rate=6.325335034779805E-4]:7.017735191910033,12[&rate=3.0476327406791826E-4]:13.472484030630742)[&rate=3.78106331783723E-4]:16.206851247819145,(9[&rate=3.997927178338957E-4]:4.000007372940936,10[&rate=1.4040934001506269E-4]:4.000007372940936)[&rate=3.78106331783723E-4]:25.679327905508952)[&rate=4.2400647471788386E-4]:7.431264870739152)[&rate=2.1352101942451052E-4]:36.45077394163107,17[&rate=3.6797457410045394E-4]:7.5613740908201095)[&rate=3.132902525254858E-4]:6.5340293322707765)[&rate=3.2191634015906205E-4]:3.86084931121178)[&rate=2.532807618765266E-4]:14.405434945806178,(13[&rate=2.7082973674323434E-4]:2.700000000000003,18[&rate=6.993815780331718E-4]:0.0)[&rate=2.2444608991173124E-4]:12.061687680108847)[&rate=2.2444608991173124E-4]:0.0967170017585488,20[&rate=4.676905868743203E-4]:98.45840468186739)[&rate=5.277749690921046E-4]:3.1969273002812173,19[&rate=1.4040934001506269E-4]:101.65533198214861)[&rate=1.0]:0.0;
tree STATE_1815000 = ((((1[&rate=2.2226566322357697E-4]:30.299999999999997,18[&rate=3.0768895039684187E-4]:0.0)[&rate=2.7772374117607034E-4]:2.726259678058625,((((2[&rate=2.9515749627772307E-4]:14.836070076897556,((3[&rate=2.0277433957015525E-4]:15.432320943291977,17[&rate=2.7772374117607034E-4]:10.532320943291978)[&rate=4.0313551086997354E-4]:3.133826852945319,(14[&rate=2.833964825625693E-4]:0.0,15[&rate=2.891978626281966E-4]:6.099999999999994)[&rate=2.7215253480141713E-4]:7.566147796237303)[&rate=5.542300121693586E-4]:1.1699222806602592)[&rate=3.541074686567554E-4]:0.16666942351268688,(4[&rate=2.0967952459265707E-4]:48.81852917447428,((5[&rate=3.541074686567554E-4]:17.600780481246492,12[&rate=2.503821784431797E-4]:17.600780481246492)[&rate=2.503821784431797E-4]:25.47641796522876,(((6[&rate=4.8066109854652436E-4]:4.359521917817895,(8[&rate=2.7772374117607034E-4]:1.4731225819186111,11[&rate=2.0967952459265707E-4]:1.4731225819186111)[&rate=2.449422820983222E-4]:2.8863993358992843)[&rate=3.541074686567554E-4]:3.0276727866906015,7[&rate=2.161359730295193E-4]:7.387194704508497)[&rate=2.0277433957015525E-4]:31.55979394007351,(9[&rate=1.7672591460049758E-4]:5.210933858369507,10[&rate=2.161359730295193E-4]:5.210933858369507)[&rate=2.612137459066212E-4]:33.7360547862125)[&rate=3.88145420866654E-4]:4.130209801893244)[&rate=4.8066109854652436E-4]:5.741330727999028)[&rate=2.7215253480141713E-4]:32.184210325935965)[&rate=2.161359730295193E-4]:0.7333320987127365,16[&rate=4.8066109854652436E-4]:15.73607159912298)[&rate=2.2226566322357697E-4]:4.806846170839435,13[&rate=5.542300121693586E-4]:2.9429177699624205)[&rate=3.641500777044009E-4]:2.4833419080962074)[&rate=2.3386517501182522E-4]:7.884010319843654,20[&rate=4.453559148432559E-4]:96.91026999790228)[&rate=2.6665740279677267E-4]:0.312635184178788,19[&rate=2.2226566322357697E-4]:97.22290518208106)[&rate=1.0]:0.0;
tree STATE_1830000 = ((((((1[&rate=2.4822757822863376E-4]:21.9055323059941,(((4[&rate=2.3302416417830972E-4]:51.88623323366172,(((5[&rate=1.1123573591487799E-4]:10.116190918222683,(6[&rate=4.8711632683021334E-4]:6.394108874713991,7[&rate=1.5159603133368352E-4]:6.394108874713991)[&rate=4.8711632683021334E-4]:3.722082043508692)[&rate=1.5159603133368352E-4]:1.0718354455093522,12[&rate=2.0157477758210983E-4]:11.188026363732035)[&rate=2.8744773715327573E-4]:23.666487760583287,((8[&rate=1.5159603133368352E-4]:0.28647017311223827,9[&rate=3.044005632094893E-4]:0.28647017311223827)[&rate=2.1762127945057952E-4]:4.0207576161610605,(10[&rate=3.5334616081600097E-4]:1.0129998209761915,11[&rate=3.133174334836503E-4]:1.0129998209761915)[&rate=2.4822757822863376E-4]:3.2942279682971067)[&rate=5.187373836685059E-4]:30.547286335042024)[&rate=3.6487704137442656E-4]:17.031719109346398)[&rate=4.616780162607582E-4]:14.11376676633828,15[&rate=3.6487704137442656E-4]:0.0)[&rate=3.323111303551179E-4]:8.058198398098341,14[&rate=1.7454797326833644E-4]:1.9581983980983466)[&rate=7.643691741221986E-4]:3.8473339078957594)[&rate=3.323111303551179E-4]:3.704488037742152,(3[&rate=2.2537155484495764E-4]:19.604169857656466,16[&rate=1.1123573591487799E-4]:14.704169857656467)[&rate=7.643691741221986E-4]:0.9058504860797854)[&rate=2.3302416417830972E-4]:7.290491754078857,17[&rate=6.248215879783841E-4]:22.90051209781511)[&rate=5.608667116553881E-4]:3.6621189796493354,((2[&rate=4.616780162607582E-4]:23.377784773807207,13[&rate=1.3607911319010277E-4]:5.777784773807213)[&rate=2.3302416417830972E-4]:0.12180045220641489,18[&rate=2.4822757822863376E-4]:3.1995852260136246)[&rate=3.6487704137442656E-4]:3.0630458514508234)[&rate=5.608667116553881E-4]:1.1106031318001328,20[&rate=4.8711632683021334E-4]:93.67323420926458)[&rate=2.4062853095043444E-4]:6.168750077576888,19[&rate=1.639079238763035E-4]:99.84198428684147)[&rate=1.0]:0.0;
tree STATE_1845000 = ((((((((1[&rate=3.3937594603534955E-4]:11.294866423145976,(4[&rate=2.84995470064898E-4]:47.98564315723182,((5[&rate=2.0403805504680907E-4]:30.368632663633797,(6[&rate=5.328847153108039E-4]:7.487201798299151,(7[&rate=4.505822352287157E-4]:0.35528789993795307,8[&rate=2.9949200134445146E-4]:0.35528789993795307)[&rate=4.981957217219279E-4]:7.131913898361198)[&rate=2.9949200134445146E-4]:22.881430865334647)[&rate=1.9481907726025626E-4]:4.0345206459603915,((9[&rate=3.225873130326448E-4]:2.2696210832259687,(10[&rate=2.0403805504680907E-4]:1.3203771077252318,11[&rate=3.3937594603534955E-4]:1.3203771077252318)[&rate=3.3080877560519973E-4]:0.9492439755007369)[&rate=4.1682949340580283E-4]:2.7751677497814096,12[&rate=6.958692125686505E-4]:5.044788833007378)[&rate=3.578152899882353E-4]:29.35836447658681)[&rate=2.7791258785840356E-4]:13.582489847637632)[&rate=3.3937594603534955E-4]:19.309223265914156)[&rate=2.3561469932478044E-4]:6.705271963644847,14[&rate=2.708969919309924E-4]:1.9001383867908288)[&rate=5.328847153108039E-4]:3.4539107976643066,17[&rate=2.28215979384324E-4]:11.45404918445513)[&rate=2.4283053335203726E-4]:8.741892438034682,13[&rate=3.069728824209022E-4]:2.5959416224898177)[&rate=2.0403805504680907E-4]:0.6100267090613585,((2[&rate=3.069728824209022E-4]:10.533456195657251,3[&rate=3.78601165370869E-4]:15.43345619565725)[&rate=1.7252497636583466E-4]:9.766543804342746,18[&rate=2.84995470064898E-4]:0.0)[&rate=2.6391632941460567E-4]:0.5059683315511734)[&rate=2.0403805504680907E-4]:2.289177300457922,(15[&rate=2.3561469932478044E-4]:4.441275125210524,16[&rate=4.505822352287157E-4]:4.441275125210524)[&rate=4.1682949340580283E-4]:18.65387050679857)[&rate=1.3211666970485637E-4]:3.08710349295319,20[&rate=4.981957217219279E-4]:92.18224912496228)[&rate=3.578152899882353E-4]:1.0272632831517399,19[&rate=2.205600236286713E-4]:93.20951240811402)[&rate=1.0]:0.0;
tree STATE_1860000 = (((((1[&rate=2.3735130382716282E-4]:36.808060321072006,(17[&rate=3.768798743299097E-4]:20.299999999999997,18[&rate=1.6747639614992656E-4]:0.0)[&rate=2.217600986946022E-4]:6.5080603210720085)[&rate=1.7381063754458938E-4]:7.010688254189731,((2[&rate=2.597976149129191E-4]:17.599999999999994,13[&rate=1.7975379647450568E-4]:0.0)[&rate=2.115889182997347E-4]:11.656126245883812,((((4[&rate=2.217600986946022E-4]:57.659562467740145,((5[&rate=3.2050919565352476E-4]:22.85259768397783,(((6[&rate=2.4824672286833304E-4]:0.4638692264040005,11[&rate=1.605866514770977E-4]:0.4638692264040005)[&rate=1.9086766298232505E-4]:3.6518082035714725,12[&rate=4.006488859027357E-4]:4.115677429975473)[&rate=2.0136963270517695E-4]:3.464786961733208,(7[&rate=3.768798743299097E-4]:5.6860797929647156,8[&rate=3.768798743299097E-4]:5.6860797929647156)[&rate=1.4379858961519163E-4]:1.8943845987439651)[&rate=5.105804039728887E-4]:15.27213329226915)[&rate=1.321368598591615E-4]:22.141038053042895,(9[&rate=2.659035596806265E-4]:8.17745782677214,10[&rate=2.064985619639566E-4]:8.17745782677214)[&rate=3.1072479055375523E-4]:36.816177910248584)[&rate=4.006488859027357E-4]:12.66592673071942)[&rate=3.2050919565352476E-4]:8.340437532259855,15[&rate=2.597976149129191E-4]:0.0)[&rate=1.528676606203671E-4]:6.099999999999994,14[&rate=2.064985619639566E-4]:0.0)[&rate=1.1283775145974926E-4]:12.73396861437584,16[&rate=2.115889182997347E-4]:18.833968614375834)[&rate=2.861044336712944E-4]:10.422157631507972)[&rate=2.2688930968008255E-4]:4.56262232937793)[&rate=2.064985619639566E-4]:1.536531764493958,3[&rate=2.166678204417766E-4]:40.25528033975569)[&rate=2.2688930968008255E-4]:8.192171263794151,20[&rate=4.006488859027357E-4]:109.54745160354985)[&rate=2.722862103869617E-4]:2.727171837470067,19[&rate=1.7381063754458938E-4]:112.27462344101991)[&rate=1.0]:0.0;
tree STATE_1875000 = (((((1[&rate=2.472931649945659E-4]:18.405824765982075,3[&rate=3.3164878903944764E-4]:13.305824765982074)[&rate=1.7380720891159993E-4]:20.530928320711766,((((2[&rate=2.8111088944276304E-4]:7.492848019614144,17[&rate=3.889406303034372E-4]:7.492848019614144)[&rate=4.248951735065203E-4]:9.73740032935649,(14[&rate=2.533723494189276E-4]:0.0,15[&rate=1.9452080284123422E-4]:6.099999999999994)[&rate=2.9818298296714895E-4]:11.130248348970639)[&rate=1.0341552124170649E-4]:6.1772555671672364,13[&rate=3.3164878903944764E-4]:5.807503916137875)[&rate=2.533723494189276E-4]:3.8636492339024358,18[&rate=1.219744427472533E-4]:6.971153150040308)[&rate=1.9452080284123422E-4]:1.6655999366535355)[&rate=1.420477578468919E-4]:2.5174075831037186,((4[&rate=2.533723494189276E-4]:51.568774739398464,(((5[&rate=1.4955455389844665E-4]:13.674039163093562,12[&rate=1.4955455389844665E-4]:13.674039163093562)[&rate=1.0341552124170649E-4]:17.871728616700203,((9[&rate=2.1464465492859898E-4]:0.9834909406004749,11[&rate=2.303371605622409E-4]:0.9834909406004749)[&rate=2.1977942447799027E-4]:4.283431711778569,10[&rate=3.190241643777971E-4]:5.266922652379043)[&rate=4.248951735065203E-4]:26.27884512741472)[&rate=2.5973380507028946E-4]:0.9530907414290652,((6[&rate=2.1977942447799027E-4]:4.620163903789103,7[&rate=2.358107549764989E-4]:4.620163903789103)[&rate=2.9818298296714895E-4]:20.21824610455255,8[&rate=2.303371605622409E-4]:24.83841000834165)[&rate=2.892820569230848E-4]:7.660448512881178)[&rate=3.648516020247011E-4]:19.069916218175635)[&rate=2.892820569230848E-4]:14.431225260601536,16[&rate=2.892820569230848E-4]:0.0)[&rate=1.6245274747614773E-4]:31.45416066979756)[&rate=2.5973380507028946E-4]:7.963247363870323,20[&rate=4.248951735065203E-4]:105.41740803366788)[&rate=1.9452080284123422E-4]:8.479987905306757,19[&rate=1.0341552124170649E-4]:113.89739593897464)[&rate=1.0]:0.0;
tree STATE_1890000 = ((((((1[&rate=3.346493437810107E-4]:16.099999999999994,14[&rate=1.6991710709307912E-4]:0.0)[&rate=2.625214952701566E-4]:24.057618976722324,((3[&rate=5.644098493833489E-4]:28.491759594346398,((4[&rate=2.3913766354450474E-4]:54.305278187365914,((((5[&rate=3.9413774933678996E-4]:7.7357112029603545,(6[&rate=6.252661286094935E-4]:4.116668013991687,7[&rate=1.3419195605990567E-4]:4.116668013991687)[&rate=2.0763982860945326E-4]:3.619043188968668)[&rate=1.3419195605990567E-4]:4.407059351348568,(8[&rate=1.978514130120272E-4]:3.0296134806127224,11[&rate=2.5054418764584825E-4]:3.0296134806127224)[&rate=2.0763982860945326E-4]:9.1131570736962)[&rate=8.46498535125307E-4]:5.807672700064225,(9[&rate=2.177474027290147E-4]:3.0368528366629106,10[&rate=3.0282599823859714E-4]:3.0368528366629106)[&rate=7.100288121746854E-4]:14.913590417710237)[&rate=1.978514130120272E-4]:16.620340585672572,12[&rate=7.100288121746854E-4]:34.57078384004572)[&rate=3.181312900555408E-4]:19.734494347320194)[&rate=1.6991710709307912E-4]:31.994721812634083,18[&rate=2.5054418764584825E-4]:0.0)[&rate=2.177474027290147E-4]:3.291759594346402)[&rate=3.181312900555408E-4]:5.904502617816362,17[&rate=9.582248087150652E-5]:29.496262212162762)[&rate=2.3913766354450474E-4]:0.6613567645595566)[&rate=1.3419195605990567E-4]:3.6321832168404597,(2[&rate=2.177474027290147E-4]:21.602724853584277,13[&rate=2.2822722225708422E-4]:4.002724853584283)[&rate=1.978514130120272E-4]:12.1870773399785)[&rate=8.438326814481939E-5]:10.243580566641626,(15[&rate=2.7515621723785794E-4]:25.085149549297597,16[&rate=6.252661286094935E-4]:25.085149549297597)[&rate=4.7880395284387236E-4]:18.948233210906807)[&rate=2.625214952701566E-4]:3.1399303355407113,20[&rate=3.9413774933678996E-4]:113.17331309574512)[&rate=3.723103840359573E-4]:3.8062932837766397,19[&rate=1.2513378657886924E-4]:116.97960637952175)[&rate=1.0]:0.0;
tree STATE_1905000 = ((((((1[&rate=1.247160223797558E-4]:16.099999999999994,14[&rate=2.807091190344218E-4]:0.0)[&rate=3.3763105121346947E-4]:0.6621558733200743,3[&rate=1.1702612806421895E-4]:11.662155873320067)[&rate=1.7472413074371787E-4]:18.2033576360557,18[&rate=1.3211561550080067E-4]:4.665513509375771)[&rate=3.2126226603117056E-4]:18.882274353446903,(((2[&rate=4.7005435366066317E-4]:19.365349081445018,(15[&rate=2.692316746502697E-4]:15.093923999711066,17[&rate=1.4642637899273128E-4]:15.093923999711066)[&rate=2.3886158112421146E-4]:4.271425081733952)[&rate=1.534706534800382E-4]:2.1421163526847096,(((4[&rate=7.795237518024192E-5]:11.885667604824288,5[&rate=1.534706534800382E-4]:11.885667604824288)[&rate=2.484108128762906E-4]:45.31911229352647,(((6[&rate=1.8936885144919414E-4]:19.254771765962378,(7[&rate=1.4642637899273128E-4]:17.597301036049416,8[&rate=1.6050811657445716E-4]:17.597301036049416)[&rate=3.3763105121346947E-4]:1.657470729912962)[&rate=3.7718706405424684E-4]:13.114004360529872,12[&rate=2.2109769257338022E-4]:32.36877612649225)[&rate=2.9307720585034793E-4]:9.196092031626065,((9[&rate=3.2126226603117056E-4]:8.665943350266962,10[&rate=9.01150098584094E-5]:8.665943350266962)[&rate=1.0007623577060494E-4]:8.394127935619986,11[&rate=1.8197547705565615E-4]:17.06007128588695)[&rate=5.22013706660589E-4]:24.504796872231367)[&rate=4.7005435366066317E-4]:15.63991174023245)[&rate=2.58503349369193E-4]:8.795220101649235,16[&rate=2.807091190344218E-4]:0.0)[&rate=1.6050811657445716E-4]:21.507465434129728)[&rate=2.692316746502697E-4]:11.73694488072087,13[&rate=2.484108128762906E-4]:15.644410314850603)[&rate=2.047241184190477E-4]:10.603377547972073)[&rate=2.9307720585034793E-4]:1.4590468763131383,20[&rate=4.0197237232466226E-4]:111.30683473913581)[&rate=3.560613947384498E-4]:0.23621781301368117,19[&rate=1.1702612806421895E-4]:111.54305255214949)[&rate=1.0]:0.0;
tree STATE_1920000 = ((((((1[&rate=3.433073240896644E-4]:40.290932866903034,((((4[&rate=1.6226084600963044E-4]:8.672906925482968,5[&rate=2.0936427716944662E-4]:8.672906925482968)[&rate=1.8850673130997705E-4]:41.40468127082128,(((6[&rate=1.5664862704007777E-4]:2.0246437734647524,(7[&rate=2.2030932902038014E-4]:1.7398867235716036,11[&rate=2.3187849744534704E-4]:1.7398867235716036)[&rate=1.4455838808116077E-4]:0.2847570498931489)[&rate=2.916076775953286E-4]:22.53450654354124,(8[&rate=1.5664862704007777E-4]:10.718902328630454,(9[&rate=5.124866137570341E-4]:1.485888630969557,10[&rate=2.8216629283028225E-4]:1.485888630969557)[&rate=2.0405733602217214E-4]:9.233013697660898)[&rate=3.8916071990814226E-4]:13.84024798837554)[&rate=3.0205504742416845E-4]:0.6099211661719828,12[&rate=2.2030932902038014E-4]:25.169071483177976)[&rate=1.988279275600133E-4]:24.90851671312627)[&rate=3.0205504742416845E-4]:22.022411803695746,14[&rate=5.124866137570341E-4]:0.0)[&rate=2.8216629283028225E-4]:12.284705082500267,(16[&rate=1.1045394350034298E-4]:7.028949080753719,17[&rate=2.5100699662398344E-4]:7.028949080753719)[&rate=1.8336626344776845E-4]:11.355756001746542)[&rate=1.988279275600133E-4]:11.906227784402773)[&rate=1.507816184103452E-4]:0.8426203154926526,13[&rate=2.0405733602217214E-4]:13.533553182395693)[&rate=2.916076775953286E-4]:3.1306191825669742,(15[&rate=1.4455838808116077E-4]:23.42999981435598,18[&rate=4.283822466635118E-4]:3.1299998143559833)[&rate=1.7820416430007122E-4]:10.83417255060668)[&rate=1.507816184103452E-4]:0.030457058495770184,(2[&rate=3.0205504742416845E-4]:16.836823433256185,3[&rate=2.2030932902038014E-4]:21.736823433256184)[&rate=1.1045394350034298E-4]:17.457805990202246)[&rate=1.676901517715355E-4]:7.343491493280965,20[&rate=5.124866137570341E-4]:107.6381209167394)[&rate=1.8336626344776845E-4]:6.132115670278637,19[&rate=1.1045394350034298E-4]:113.77023658701803)[&rate=1.0]:0.0;
tree STATE_1935000 = ((((((1[&rate=8.824213935529723E-5]:29.181403123993306,13[&rate=2.228082459380647E-4]:1.5814031239933115)[&rate=2.1344840994514308E-4]:2.4693316016339963,(14[&rate=1.348541424853031E-4]:0.0,(15[&rate=1.2025188178975345E-4]:0.9345794952519952,16[&rate=2.1344840994514308E-4]:0.9345794952519952)[&rate=4.502385991383461E-4]:5.165420504747999)[&rate=7.851192666273779E-5]:15.550734725627308)[&rate=4.946660358359964E-4]:3.7437465794077696,(2[&rate=1.718111195652977E-4]:18.60298526596742,((4[&rate=4.502385991383461E-4]:42.00865798920333,((((5[&rate=1.2025188178975345E-4]:4.012076369104436,7[&rate=1.7960756340545912E-4]:4.012076369104436)[&rate=4.1551839901056133E-4]:8.88399409483334,6[&rate=2.0450088749684634E-4]:12.896070463937777)[&rate=1.9591011582536393E-4]:14.32057465688039,((8[&rate=4.1551839901056133E-4]:4.520617796414254,(10[&rate=1.8762704820654352E-4]:3.1299390791027517,11[&rate=1.2025188178975345E-4]:3.1299390791027517)[&rate=4.940569067286003E-5]:1.3906787173115025)[&rate=1.9591011582536393E-4]:1.5320232454869194,9[&rate=2.540603272885542E-4]:6.052641041901174)[&rate=5.559714443906157E-4]:21.164004078916996)[&rate=3.8707080365146395E-4]:3.9283891588387974,12[&rate=5.559714443906157E-4]:31.145034279656965)[&rate=2.0450088749684634E-4]:10.863623709546363)[&rate=2.784964400453218E-4]:31.43013509656855,17[&rate=2.922041229310712E-4]:7.438793085771877)[&rate=1.718111195652977E-4]:11.164192180195542)[&rate=6.679866765380077E-5]:6.791496039067653)[&rate=3.8707080365146395E-4]:0.25940907162701876,(3[&rate=1.1277107148561176E-4]:30.423320235396965,18[&rate=4.940569067286003E-5]:5.223320235396969)[&rate=4.502385991383461E-4]:0.13057014126512456)[&rate=2.784964400453218E-4]:18.645307576535245,20[&rate=3.8707080365146395E-4]:110.29919795319734)[&rate=4.946660358359964E-4]:19.405553829995284,19[&rate=4.940569067286003E-5]:129.70475178319262)[&rate=1.0]:0.0;
tree STATE_1950000 = (((((1[&rate=5.40868354610374E-4]:32.98546099686712,(3[&rate=8.651002047478809E-4]:25.199999999999996,18[&rate=5.40868354610374E-4]:0.0)[&rate=4.696517476045228E-4]:2.6854609968671213)[&rate=1.805327588956575E-4]:0.17714723213653372,(13[&rate=3.5315246867923287E-4]:2.8321795823175933,(14[&rate=2.2972374005820868E-4]:12.045256596366443,16[&rate=8.651002047478809E-4]:18.145256596366437)[&rate=1.3393212404329855E-4]:2.2869229859511506)[&rate=3.2711897605232733E-4]:2.7304286466860646)[&rate=2.2972374005820868E-4]:4.192357217919394,(((2[&rate=4.2096748966739773E-4]:7.134607864494583,(((4[&rate=2.214474025168863E-4]:10.819465419779359,5[&rate=3.2711897605232733E-4]:10.819465419779359)[&rate=1.7207895939424036E-4]:15.459425044260755,12[&rate=2.214474025168863E-4]:26.278890464040114)[&rate=3.396764810085624E-4]:27.348922575851024,(((6[&rate=2.4670277723853564E-4]:5.892748908841981,7[&rate=3.1533374627461784E-4]:5.892748908841981)[&rate=2.3812908560730077E-4]:1.3797206538726696,(8[&rate=4.2096748966739773E-4]:2.0383035124491418,11[&rate=5.40868354610374E-4]:2.0383035124491418)[&rate=3.0420327435444743E-4]:5.234166050265509)[&rate=2.0512286897410333E-4]:36.36662433457978,(9[&rate=8.651002047478809E-4]:3.6814276584164465,10[&rate=6.776365308535331E-4]:3.6814276584164465)[&rate=2.936312609514319E-4]:39.957666238877984)[&rate=4.0125486368177294E-4]:9.988719142596707)[&rate=1.8881256764362984E-4]:19.506794824603446)[&rate=2.6451994580573793E-4]:1.2359804260674565,17[&rate=1.2184222087433769E-4]:8.37058829056204)[&rate=4.0125486368177294E-4]:12.301612619989214,15[&rate=4.434409737840582E-4]:20.672200910551254)[&rate=1.4453687463827396E-4]:6.682764536371792)[&rate=1.6335803825842955E-4]:2.387960414170095,20[&rate=5.011845436817623E-4]:95.74292586109314)[&rate=2.0512286897410333E-4]:11.772618866881444,19[&rate=1.3393212404329855E-4]:107.51554472797459)[&rate=1.0]:0.0;
tree STATE_1965000 = ((((((1[&rate=3.6008113750894883E-4]:36.34568760521108,14[&rate=9.222806462634102E-4]:20.24568760521109)[&rate=1.8255609050037066E-4]:2.440881600504312,((((2[&rate=8.21219456348331E-5]:11.71615864050274,3[&rate=3.2717328932022445E-4]:16.61615864050274)[&rate=1.7452251647684893E-4]:9.159199015156446,(4[&rate=1.6654355240446492E-4]:83.1842095961691,(((5[&rate=3.127756823651842E-4]:19.79082089632937,12[&rate=2.6427438766383446E-4]:19.79082089632937)[&rate=3.42847891448261E-4]:12.95428435371884,((9[&rate=3.42847891448261E-4]:3.867173944603832,10[&rate=6.191077087815831E-5]:3.867173944603832)[&rate=3.6008113750894883E-4]:9.822936567443662,11[&rate=1.5857288768633348E-4]:13.690110512047493)[&rate=2.753113813097285E-4]:19.05499473800072)[&rate=3.6008113750894883E-4]:14.038003532136749,(6[&rate=2.8699651280156713E-4]:12.390524059145923,(7[&rate=9.553932750715561E-5]:3.693150200075835,8[&rate=3.792515707492534E-4]:3.693150200075835)[&rate=1.8255609050037066E-4]:8.697373859070087)[&rate=2.4379481600117007E-4]:34.392584723039036)[&rate=1.4243260954700755E-4]:36.40110081398414)[&rate=5.9765027937733E-4]:3.6911480594900894)[&rate=1.0658800870145235E-4]:4.552357794658164,17[&rate=1.8255609050037066E-4]:25.42771545031735)[&rate=6.952965536164116E-4]:0.3598115816036369,18[&rate=5.9765027937733E-4]:5.48752703192099)[&rate=2.0739827574340844E-4]:2.9990421737944075)[&rate=1.4243260954700755E-4]:5.946872262090224,13[&rate=1.6654355240446492E-4]:17.133441467805625)[&rate=1.505573349725833E-4]:2.3808997526002997,(15[&rate=2.4379481600117007E-4]:31.375547581061568,16[&rate=4.2574254565937706E-4]:31.375547581061568)[&rate=3.127756823651842E-4]:5.738793639344351)[&rate=4.008850638752715E-4]:19.938360801171868,20[&rate=3.792515707492534E-4]:123.05270202157779)[&rate=1.3411651327386226E-4]:1.879953529025343,19[&rate=1.1640959714991104E-4]:124.93265555060313)[&rate=1.0]:0.0;
tree STATE_1980000 = (((((((1[&rate=4.48513359617749E-4]:23.83831013321074,3[&rate=3.9670139518562946E-4]:18.73831013321074)[&rate=3.035516563446168E-4]:6.461689866789257,18[&rate=2.5030891831120185E-4]:0.0)[&rate=3.450222314896029E-4]:0.918189409611486,15[&rate=1.6991817714619232E-4]:21.218189409611483)[&rate=1.585594426627489E-4]:0.10767054473983251,13[&rate=3.339466116273403E-4]:3.7258599543513213)[&rate=3.132822372405952E-4]:1.9797970898996908,(((2[&rate=4.953681113076439E-4]:3.0232134837255273,(((4[&rate=2.5878841211944743E-4]:14.58104309656236,5[&rate=2.67371347168335E-4]:14.58104309656236)[&rate=1.6991817714619232E-4]:50.583974015326525,((6[&rate=2.5878841211944743E-4]:7.159018139546836,7[&rate=3.035516563446168E-4]:7.159018139546836)[&rate=1.6991817714619232E-4]:37.802075117805,(((8[&rate=3.035516563446168E-4]:3.159425427249585,11[&rate=1.898927288052749E-4]:3.159425427249585)[&rate=4.122702653548465E-4]:2.949703809905117,12[&rate=1.8024526285595195E-4]:6.109129237154702)[&rate=6.910241290508323E-4]:1.379021690546483,(9[&rate=2.67371347168335E-4]:6.505042069367082,10[&rate=2.418925196682878E-4]:6.505042069367082)[&rate=4.48513359617749E-4]:0.983108858334103)[&rate=3.691216063876009E-4]:37.47294232965066)[&rate=2.9414352900692444E-4]:20.203923854537045)[&rate=2.760975034630643E-4]:0.8349828881111137,17[&rate=1.898927288052749E-4]:0.0)[&rate=2.2507547620628383E-4]:3.0232134837255273)[&rate=1.035124076070478E-4]:7.3403882225887855,16[&rate=5.631184994955809E-4]:10.363601706314313)[&rate=6.136275370371533E-4]:11.983177144971833,14[&rate=3.5671024442722357E-4]:16.24677885128615)[&rate=8.625802210306563E-4]:0.9588781929648604)[&rate=2.334968121020919E-4]:2.067006673872683,20[&rate=5.254750076343058E-4]:91.37266371812369)[&rate=1.2921076367585803E-4]:7.164728798821329,19[&rate=2.0793500415114839E-4]:98.53739251694502)[&rate=1.0]:0.0;
tree STATE_1995000 = ((((((((1[&rate=2.1898603428472174E-4]:10.194261010095744,((4[&rate=3.156278099776179E-4]:7.840703998013637,5[&rate=3.0325995314492595E-4]:7.840703998013637)[&rate=2.9185566187504494E-4]:42.32367631777514,(((6[&rate=3.4519906935834375E-4]:2.8251188294576406,(7[&rate=3.2229838054273805E-4]:2.7194111799246032,11[&rate=2.4067120957686462E-4]:2.7194111799246032)[&rate=1.9938728922256173E-4]:0.10570764953303735)[&rate=1.695426059742711E-4]:9.799711472632188,12[&rate=1.4868293218590488E-4]:12.624830302089828)[&rate=3.890315244885136E-4]:16.901827626931535,(8[&rate=1.9938728922256173E-4]:6.55570624316436,(9[&rate=3.4519906935834375E-4]:3.0473254206243054,10[&rate=2.5578036363019615E-4]:3.0473254206243054)[&rate=2.607693311526779E-4]:3.508380822540054)[&rate=5.217003723931052E-4]:22.970951685857003)[&rate=2.5578036363019615E-4]:20.637722386767415)[&rate=2.708199273129561E-4]:16.029880694306968)[&rate=1.8189532469846268E-4]:5.346918421131932,15[&rate=1.9938728922256173E-4]:5.541179431227675)[&rate=2.9185566187504494E-4]:2.066874644371339,17[&rate=1.8189532469846268E-4]:7.608054075599014)[&rate=3.2229838054273805E-4]:12.762081487545203,14[&rate=2.864188830545282E-4]:14.270135563144223)[&rate=3.4519906935834375E-4]:3.602886953038748,16[&rate=2.81118058549512E-4]:23.973022516182965)[&rate=3.890315244885136E-4]:5.476698925915187,(2[&rate=1.4868293218590488E-4]:24.997873399510198,((3[&rate=1.913849727383631E-4]:22.499999999999993,13[&rate=4.5751296934563293E-4]:0.0)[&rate=2.0647527987371043E-4]:6.368150741870451,18[&rate=3.890315244885136E-4]:3.6681507418704484)[&rate=2.1294852281285884E-4]:1.029722657639752)[&rate=2.1898603428472174E-4]:4.4518480425879545)[&rate=1.695426059742711E-4]:4.65376498482685,20[&rate=5.217003723931052E-4]:100.103486426925)[&rate=3.0325995314492595E-4]:1.0405332424367089,19[&rate=1.4868293218590488E-4]:101.14401966936171)[&rate=1.0]:0.0;
tree STATE_2010000 = (((((1[&rate=2.6359857395421036E-4]:32.30067718959555,(13[&rate=3.549160414156871E-4]:0.0,17[&rate=5.53557468674323E-4]:17.599999999999994)[&rate=1.1711991387551404E-4]:4.700677189595552)[&rate=1.8909976318065601E-4]:0.4606121537000689,((2[&rate=3.320850065077017E-4]:18.76915317855689,(15[&rate=2.068922077051207E-4]:5.403771405870273,16[&rate=3.6873444636582593E-4]:5.403771405870273)[&rate=3.050445069157264E-4]:13.365381772686618)[&rate=4.0503796463970483E-4]:1.777419633801685,((((4[&rate=2.2916511816000994E-4]:36.045625736855996,12[&rate=2.8989702904474486E-4]:36.045625736855996)[&rate=2.0113944607605324E-4]:25.58137457981023,((5[&rate=1.8909976318065601E-4]:24.073978861126847,((6[&rate=1.8267025293554052E-4]:7.238585563266394,(7[&rate=3.549160414156871E-4]:1.0142317362790405,8[&rate=3.6873444636582593E-4]:1.0142317362790405)[&rate=1.6838717846836195E-4]:6.224353826987354)[&rate=1.6838717846836195E-4]:3.584688953451824,11[&rate=2.2916511816000994E-4]:10.823274516718218)[&rate=2.1810647850888687E-4]:13.250704344408629)[&rate=3.428486739792829E-4]:19.699296600536982,(9[&rate=1.5030385824271405E-4]:3.138350344733246,10[&rate=3.549160414156871E-4]:3.138350344733246)[&rate=2.6980346266974094E-4]:40.63492511693058)[&rate=3.050445069157264E-4]:17.853724855002397)[&rate=2.6980346266974094E-4]:10.472999683333768,14[&rate=2.2916511816000994E-4]:0.0)[&rate=2.5757569569415166E-4]:14.200000000000003,18[&rate=3.320850065077017E-4]:0.0)[&rate=2.7622613395427543E-4]:0.24657281235857909)[&rate=2.5757569569415166E-4]:2.2147165309370394)[&rate=2.972520738472365E-4]:3.2001875515976224,3[&rate=1.6838717846836195E-4]:30.861476894893237)[&rate=1.8267025293554052E-4]:3.600619661536342,20[&rate=5.53557468674323E-4]:95.56209655642958)[&rate=2.972520738472365E-4]:2.6430078564656014,19[&rate=2.1810647850888687E-4]:98.20510441289518)[&rate=1.0]:0.0;
tree STATE_2025000 = ((((((1[&rate=8.251134347125668E-5]:22.028714488171204,(14[&rate=1.2316880932754885E-4]:0.0,16[&rate=2.8075357096260295E-4]:6.099999999999994)[&rate=6.387055955572387E-5]:5.9287144881712095)[&rate=5.322521888799434E-4]:0.9965599561148792,17[&rate=1.4783561867927938E-4]:13.025274444286083)[&rate=0.001206518884152022]:0.9289119699564452,2[&rate=1.6527083619574038E-4]:13.954186414242528)[&rate=1.4783561867927938E-4]:15.051098595588655,(((3[&rate=3.565581530727553E-4]:22.499999999999993,13[&rate=9.095447095788979E-5]:0.0)[&rate=3.639963182247841E-5]:7.709736861793701,(15[&rate=5.966673628394358E-4]:22.65767049944874,18[&rate=8.365909058628188E-4]:2.3576704994487443)[&rate=6.387055955572387E-5]:2.6520663623449536)[&rate=4.430130222517409E-4]:2.129486657444801,((4[&rate=2.041864273729475E-4]:47.15043499769045,((6[&rate=1.8391794635184823E-4]:9.743311692517477,(7[&rate=1.7441900279165152E-4]:5.756118170739985,(8[&rate=6.875913327749375E-4]:5.536402541316929,11[&rate=1.8391794635184823E-4]:5.536402541316929)[&rate=3.813531811341986E-4]:0.21971562942305578)[&rate=1.4783561867927938E-4]:3.987193521777492)[&rate=8.365909058628188E-4]:7.1012502267726205,(9[&rate=1.7441900279165152E-4]:2.716738061949105,10[&rate=1.2316880932754885E-4]:2.716738061949105)[&rate=8.365909058628188E-4]:14.127823857340992)[&rate=1.8391794635184823E-4]:30.305873078400356)[&rate=2.970653727588894E-4]:31.295029630571022,(5[&rate=1.6527083619574038E-4]:2.7528034498618874,12[&rate=3.639963182247841E-5]:2.7528034498618874)[&rate=2.5178932608886136E-4]:75.69266117839959)[&rate=1.7441900279165152E-4]:14.99375889097702)[&rate=3.149081464973003E-4]:1.5660614905926877)[&rate=2.1508208814382577E-4]:9.872015077154572,20[&rate=3.813531811341986E-4]:104.87730008698576)[&rate=1.5642487829959248E-4]:6.670684128928329,19[&rate=1.7441900279165152E-4]:111.54798421591408)[&rate=1.0]:0.0;
tree STATE_2040000 = ((((((((1[&rate=2.769197126413804E-4]:10.0,16[&rate=3.9037214855990504E-4]:0.0)[&rate=4.462259962972549E-4]:3.9972577768918285,((4[&rate=3.049485706039E-4]:45.811573161171296,((5[&rate=2.2696949633794388E-4]:11.177580682508916,12[&rate=2.769197126413804E-4]:11.177580682508916)[&rate=1.8617343299934098E-4]:23.93326118221175,(((6[&rate=4.462259962972549E-4]:3.0875765755636464,7[&rate=3.3692987927288104E-4]:3.0875765755636464)[&rate=5.849911709575697E-4]:3.6517665842500286,11[&rate=5.360528682734945E-4]:6.739343159813675)[&rate=3.3692987927288104E-4]:21.40776917900114,((8[&rate=4.0687675134693977E-4]:3.1276107804962354,9[&rate=6.601126896825749E-4]:3.1276107804962354)[&rate=9.572965366291819E-5]:3.964539530435845,10[&rate=1.9460389302059788E-4]:7.09215031093208)[&rate=5.849911709575697E-4]:21.054962027882734)[&rate=4.705283447068442E-4]:6.963729525905855)[&rate=1.4770893782680165E-4]:10.700731296450627)[&rate=2.769197126413804E-4]:20.188426838828704,15[&rate=1.6827849093983932E-4]:0.0)[&rate=4.253012823369303E-4]:3.9972577768918285)[&rate=4.253012823369303E-4]:7.337643711511959,(14[&rate=2.1895970333774548E-4]:0.0,17[&rate=3.9037214855990504E-4]:6.099999999999994)[&rate=3.3692987927288104E-4]:5.234901488403793)[&rate=1.6827849093983932E-4]:8.96509851159621,18[&rate=1.9460389302059788E-4]:0.0)[&rate=1.7744326966316496E-4]:11.671399115890182,(2[&rate=5.360528682734945E-4]:17.599999999999994,13[&rate=2.5130559299041226E-4]:0.0)[&rate=2.5964968333803246E-4]:14.371399115890185)[&rate=3.2570476103640914E-4]:0.9264822829231747,3[&rate=3.1507376676136737E-4]:37.79788139881335)[&rate=2.769197126413804E-4]:0.7110372196333259,20[&rate=4.99628386403563E-4]:99.60891861844668)[&rate=3.1507376676136737E-4]:1.9561976423488971,19[&rate=1.5847738428483257E-4]:101.56511626079558)[&rate=1.0]:0.0;
tree STATE_2055000 = ((((((1[&rate=4.817762277582188E-4]:22.26081158215105,((4[&rate=1.8638804555305482E-4]:2.5199687791239045,5[&rate=2.672303646216165E-4]:2.5199687791239045)[&rate=1.6377190004532793E-4]:65.54274821682021,((6[&rate=6.605035950894193E-4]:1.9917406087006264,7[&rate=3.337929710850927E-4]:1.9917406087006264)[&rate=3.5955444030507034E-4]:30.065212369126254,((8[&rate=3.4636286699077915E-4]:10.360436083910372,12[&rate=2.7757350427606034E-4]:10.360436083910372)[&rate=2.672303646216165E-4]:14.355876294009555,((9[&rate=3.8823656901234725E-4]:1.2741618842707172,11[&rate=2.3708412940124548E-4]:1.2741618842707172)[&rate=1.3672531599822116E-4]:1.1895754515558565,10[&rate=4.817762277582188E-4]:2.4637373358265737)[&rate=4.817762277582188E-4]:22.252575042093355)[&rate=2.470347823242757E-4]:7.340640599906955)[&rate=1.511010488292415E-4]:36.00576401811723)[&rate=9.19851067917803E-5]:10.198094586206935)[&rate=2.7757350427606034E-4]:3.9527271833535025,(3[&rate=3.337929710850927E-4]:18.705314361723943,15[&rate=2.0715589566943577E-4]:13.805314361723944)[&rate=6.605035950894193E-4]:2.4082244037806078)[&rate=9.19851067917803E-5]:7.742224869902145,((14[&rate=2.3708412940124548E-4]:0.0,17[&rate=5.068221322074997E-4]:6.099999999999994)[&rate=7.299510353649092E-4]:15.376617781204146,16[&rate=4.594786448783797E-4]:21.47661778120414)[&rate=4.594786448783797E-4]:2.4791458542025566)[&rate=6.605035950894193E-4]:9.338003823601241,((2[&rate=2.9899606827866234E-4]:27.155879555040343,18[&rate=4.393466083001022E-4]:6.855879555040346)[&rate=2.7757350427606034E-4]:0.6317875755770643,13[&rate=5.068221322074997E-4]:10.187667130617413)[&rate=1.511010488292415E-4]:5.506100328390531)[&rate=2.7757350427606034E-4]:2.8567215968075175,20[&rate=5.068221322074997E-4]:102.15048905581546)[&rate=1.8638804555305482E-4]:7.745949333582146,19[&rate=1.511010488292415E-4]:109.8964383893976)[&rate=1.0]:0.0;
tree STATE_2070000 = (((((((1[&rate=2.2651946883792064E-4]:25.42396304919515,16[&rate=1.8629458531639495E-4]:15.423963049195152)[&rate=2.9198081169613864E-4]:1.8465592392755497,((3[&rate=1.8629458531639495E-4]:14.844483297796678,(((4[&rate=1.3963929355946116E-4]:9.16715503705165,11[&rate=3.6019506199127816E-4]:9.16715503705165)[&rate=3.3109471971461607E-4]:38.17745972212463,((6[&rate=1.3963929355946116E-4]:8.38935727086321,7[&rate=1.3469843965893634E-4]:8.38935727086321)[&rate=2.9198081169613864E-4]:25.667183571279246,((8[&rate=1.8629458531639495E-4]:0.15453186237678673,9[&rate=2.4386329225447193E-4]:0.15453186237678673)[&rate=1.4949291064821456E-4]:8.496223093528222,10[&rate=1.1401620243081609E-4]:8.65075495590501)[&rate=2.9198081169613864E-4]:25.405785886237446)[&rate=2.0478736043941744E-4]:13.288073917033827)[&rate=2.0478736043941744E-4]:16.28421948974946,(5[&rate=2.537976877893567E-4]:37.61633356233973,12[&rate=6.288301903776568E-5]:37.61633356233973)[&rate=1.751264729717487E-4]:26.01250068658601)[&rate=6.288301903776568E-5]:12.315649048870938)[&rate=1.1401620243081609E-4]:2.079507840841643,(14[&rate=1.751264729717487E-4]:0.0,(15[&rate=3.093741979509553E-4]:5.43721897026569,17[&rate=8.781635825634255E-5]:5.43721897026569)[&rate=1.4949291064821456E-4]:0.6627810297343046)[&rate=2.537976877893567E-4]:5.923991138638328)[&rate=3.093741979509553E-4]:5.246531149832379)[&rate=2.2651946883792064E-4]:3.029477711529296,18[&rate=1.5445786565206047E-4]:0.0)[&rate=1.3963929355946116E-4]:2.2943729032475346,13[&rate=2.3482839657298958E-4]:4.9943729032475375)[&rate=7.81595582584675E-5]:1.1018865218641736,2[&rate=1.4456169003371612E-4]:23.696259425111705)[&rate=1.6979032725116948E-4]:14.283129704844669,20[&rate=5.030136766651575E-4]:103.97938912995637)[&rate=1.4949291064821456E-4]:4.3204471180486195,19[&rate=1.2463083837172017E-4]:108.299836248005)[&rate=1.0]:0.0;
tree STATE_2085000 = ((((((1[&rate=2.1452096760024944E-4]:18.527068520915464,((4[&rate=2.1452096760024944E-4]:57.55622959958393,(5[&rate=6.070497744931036E-5]:20.493174084809187,12[&rate=7.672876289204686E-5]:20.493174084809187)[&rate=6.070497744931036E-5]:37.063055514774746)[&rate=1.02829490815653E-4]:2.827597046486723,((((6[&rate=1.503421450009195E-4]:5.894175858913635,8[&rate=2.1452096760024944E-4]:5.894175858913635)[&rate=1.02829490815653E-4]:1.8032500044336262,11[&rate=7.672876289204686E-5]:7.697425863347261)[&rate=2.3230399773237066E-5]:0.3016958609145952,7[&rate=6.070497744931036E-5]:7.999121724261856)[&rate=5.23016568044824E-4]:16.619158544154082,(9[&rate=1.0770715534587927E-4]:7.453838164734464,10[&rate=7.672876289204686E-5]:7.453838164734464)[&rate=5.23016568044824E-4]:17.164442103681477)[&rate=8.497837233655342E-5]:35.765546377654715)[&rate=1.4297619064282133E-4]:14.143241874844811)[&rate=3.776270971116042E-4]:20.470522725012742,3[&rate=1.3614846267431048E-4]:33.897591245928204)[&rate=2.0014642084091158E-4]:0.6123961996915739,(((14[&rate=7.269878436847176E-5]:5.121493511885106,17[&rate=5.663727932809115E-5]:11.2214935118851)[&rate=3.776270971116042E-4]:9.725761610885911,18[&rate=7.269878436847176E-5]:0.6472551227710142)[&rate=1.503421450009195E-4]:3.749154211534517,(15[&rate=1.4297619064282133E-4]:7.382265500262193,16[&rate=1.5834849286964174E-4]:7.382265500262193)[&rate=3.17169502511301E-4]:17.314143834043335)[&rate=1.3614846267431048E-4]:4.913578111314251)[&rate=2.795752286655789E-4]:5.127897441930713,(2[&rate=6.870237392637707E-5]:17.599999999999994,13[&rate=8.497837233655342E-5]:0.0)[&rate=1.02829490815653E-4]:17.1378848875505)[&rate=6.870237392637707E-5]:4.997551944138195,20[&rate=5.23016568044824E-4]:105.73543683168869)[&rate=3.776270971116042E-4]:18.78723878320399,19[&rate=1.02829490815653E-4]:124.52267561489268)[&rate=1.0]:0.0;
tree STATE_2100000 = ((((((1[&rate=2.321242499559594E-4]:18.820725953212502,15[&rate=8.492007938919769E-4]:8.820725953212502)[&rate=1.7953166281896998E-4]:9.240104064614954,(2[&rate=3.657017834308487E-4]:7.351501802623304,(((3[&rate=6.814307071126918E-4]:2.8333556393589134,((4[&rate=1.9814000918760562E-4]:22.3519503725773,(5[&rate=3.207118676896602E-4]:0.4235699862009868,12[&rate=4.0811435935923985E-4]:0.4235699862009868)[&rate=4.437134405253147E-4]:21.92838038637631)[&rate=2.4040731865606122E-4]:20.425754915134313,((6[&rate=1.693198840432343E-4]:3.574492454541971,7[&rate=1.693198840432343E-4]:3.574492454541971)[&rate=2.9191181160422025E-4]:19.011847940658548,((8[&rate=3.787514023159165E-4]:0.24063478291238063,11[&rate=3.207118676896602E-4]:0.24063478291238063)[&rate=1.0352956075254611E-4]:3.445929484121321,(9[&rate=5.19238397068008E-4]:2.004510267357726,10[&rate=2.4040731865606122E-4]:2.004510267357726)[&rate=3.011778958144731E-4]:1.6820539996759756)[&rate=4.650053623486877E-4]:18.899776128166817)[&rate=2.82911504213911E-4]:20.191364892511093)[&rate=3.310996492293264E-4]:21.155650351647303)[&rate=1.7953166281896998E-4]:2.3420208824420357,16[&rate=3.310996492293264E-4]:0.2753765218009505)[&rate=3.207118676896602E-4]:5.824623478199044,14[&rate=2.655314959921826E-4]:0.0)[&rate=1.0352956075254611E-4]:1.2515018026233093)[&rate=3.787514023159165E-4]:10.709328215204152)[&rate=1.9814000918760562E-4]:1.0858309784648696,17[&rate=1.0352956075254611E-4]:19.146660996292326)[&rate=1.0352956075254611E-4]:1.5750572111152366,(13[&rate=1.7953166281896998E-4]:2.700000000000003,18[&rate=2.1542340563655908E-4]:0.0)[&rate=1.0352956075254611E-4]:0.42171820740756516)[&rate=4.650053623486877E-4]:2.18275168729339,20[&rate=6.056444208777118E-4]:88.90446989470095)[&rate=1.9814000918760562E-4]:17.502873474839475,19[&rate=1.0352956075254611E-4]:106.40734336954043)[&rate=1.0]:0.0;
tree STATE_2115000 = (((((((((1[&rate=3.055581061860586E-4]:4.982613139055104,(4[&rate=2.513572453871072E-4]:45.13034385747081,((5[&rate=4.4175290811179606E-4]:8.18859141627089,(((8[&rate=2.887069232092693E-4]:1.4222779982270717,10[&rate=2.513572453871072E-4]:1.4222779982270717)[&rate=2.8078327566584925E-4]:1.3142846532714605,9[&rate=2.2385283635006488E-4]:2.736562651498532)[&rate=3.5715313457739434E-4]:4.281550612671413,12[&rate=1.7298995466971082E-4]:7.018113264169946)[&rate=2.1703033279194865E-4]:1.1704781521009444)[&rate=4.4175290811179606E-4]:25.28862956402517,((6[&rate=3.5715313457739434E-4]:2.4965615953755966,7[&rate=2.5845049627681686E-4]:2.4965615953755966)[&rate=6.819909723086427E-4]:0.047374250763272396,11[&rate=2.7312695379593297E-4]:2.543935846138869)[&rate=3.241798412086459E-4]:30.93328513415719)[&rate=2.374951784060378E-4]:11.653122877174752)[&rate=2.1703033279194865E-4]:15.852269281584292)[&rate=2.031861683866688E-4]:12.683141231246168,(14[&rate=1.960654041343332E-4]:0.0,15[&rate=4.4175290811179606E-4]:6.099999999999994)[&rate=3.241798412086459E-4]:1.5657543703012777)[&rate=3.453074517509903E-4]:7.062332393318826,16[&rate=2.374951784060378E-4]:14.728086763620098)[&rate=2.031861683866688E-4]:1.2792462248030176,2[&rate=2.374951784060378E-4]:16.007332988423116)[&rate=3.055581061860586E-4]:10.661094869064925,(17[&rate=1.8872573668782535E-4]:25.531699405501996,18[&rate=4.4175290811179606E-4]:5.231699405501999)[&rate=1.642741351771788E-4]:1.1367284519860448)[&rate=1.960654041343332E-4]:1.8248891466301842,3[&rate=2.374951784060378E-4]:33.393317004118224)[&rate=4.007621466396262E-4]:5.551451861280398,13[&rate=4.194959012540582E-4]:16.44476886539863)[&rate=2.8078327566584925E-4]:0.09855147602075931,20[&rate=4.4175290811179606E-4]:100.14332034141938)[&rate=3.5715313457739434E-4]:0.20467155215239075,19[&rate=2.3066278689969096E-4]:100.34799189357177)[&rate=1.0]:0.0;
tree STATE_2130000 = ((((((1[&rate=2.3690484796607395E-4]:21.761836744024976,((((4[&rate=2.460942967587775E-4]:48.78591039652143,(((6[&rate=2.190977618214609E-4]:6.575644472974621,(8[&rate=1.384463812319766E-4]:1.58412036550395,11[&rate=5.275823149341211E-4]:1.58412036550395)[&rate=3.471645774716025E-4]:4.991524107470671)[&rate=2.0177024907150326E-4]:1.2452720212077883,7[&rate=1.1520468232840305E-4]:7.820916494182409)[&rate=3.7811018814413934E-4]:13.661075350475983,((9[&rate=3.957575052107056E-4]:2.687671248751091,10[&rate=1.0007811259573718E-4]:2.687671248751091)[&rate=9.491906348516995E-4]:13.937022551264949,12[&rate=2.6526786504651133E-4]:16.62469380001604)[&rate=2.460942967587775E-4]:4.857298044642352)[&rate=1.0007811259573718E-4]:27.30391855186304)[&rate=5.275823149341211E-4]:1.1968297247951014,5[&rate=1.1520468232840305E-4]:49.98274012131653)[&rate=1.845621658286172E-4]:24.398672739982366,(14[&rate=3.204712368926929E-4]:0.0,17[&rate=3.333756661747128E-4]:6.099999999999994)[&rate=2.1039549264092992E-4]:2.2814128612989037)[&rate=1.1520468232840305E-4]:0.07722849669194431,16[&rate=2.6526786504651133E-4]:8.458641357990842)[&rate=2.555328328942716E-4]:3.303195386034133)[&rate=4.91956111860407E-4]:9.213967566383573,((2[&rate=1.1520468232840305E-4]:13.606061011906078,15[&rate=1.275486144224486E-4]:13.606061011906078)[&rate=1.275486144224486E-4]:6.693938988093919,18[&rate=2.0177024907150326E-4]:0.0)[&rate=1.758691146582283E-4]:0.6758043104085516)[&rate=2.8584139845089744E-4]:0.22558889569793905,13[&rate=1.4847231398020276E-4]:3.6013932061064935)[&rate=2.6526786504651133E-4]:5.3589845198021635,3[&rate=2.460942967587775E-4]:31.46037772590865)[&rate=3.333756661747128E-4]:0.8309225842459966,20[&rate=6.340181738134967E-4]:93.39130031015465)[&rate=2.555328328942716E-4]:3.3798298628794896,19[&rate=1.845621658286172E-4]:96.77113017303414)[&rate=1.0]:0.0;
tree STATE_2145000 = ((((((((1[&rate=3.782879062731932E-4]:10.0,16[&rate=3.9117511765417715E-4]:0.0)[&rate=3.2658366519981784E-4]:6.099999999999994,14[&rate=2.4171391548317764E-4]:0.0)[&rate=2.0605470382454593E-4]:3.3682528862722734,17[&rate=3.200986896262469E-4]:9.468252886272268)[&rate=2.916345292905324E-4]:10.83174711372773,18[&rate=2.6164863704412444E-4]:0.0)[&rate=3.3346641566183675E-4]:1.7323379920123472,((4[&rate=1.7638039846317496E-4]:61.51069597455809,((5[&rate=4.2718173239473064E-4]:20.36080295729028,(((6[&rate=2.1307441151331152E-4]:0.4003553966652172,8[&rate=3.672530515730287E-4]:0.4003553966652172)[&rate=4.569865683152538E-4]:3.263560630057514,7[&rate=2.468080360432195E-4]:3.6639160267227315)[&rate=2.813812618632187E-4]:2.442140677090617,12[&rate=3.782879062731932E-4]:6.106056703813349)[&rate=3.5753726025231715E-4]:14.254746253476931)[&rate=4.569865683152538E-4]:10.064635051763943,((9[&rate=2.6164863704412444E-4]:1.5915769028740412,10[&rate=4.2718173239473064E-4]:1.5915769028740412)[&rate=2.2544076372594236E-4]:1.3642292763722552,11[&rate=2.3648814378158544E-4]:2.9558061792462964)[&rate=3.488060453093242E-4]:27.469631829807927)[&rate=2.2544076372594236E-4]:31.085257965503867)[&rate=2.0605470382454593E-4]:4.4893040254419105,15[&rate=3.488060453093242E-4]:0.0)[&rate=2.3648814378158544E-4]:22.032337992012344)[&rate=3.0240560502367217E-4]:15.546379820259006,(2[&rate=2.3648814378158544E-4]:26.636569726199937,(3[&rate=3.200986896262469E-4]:22.499999999999993,13[&rate=3.672530515730287E-4]:0.0)[&rate=3.0240560502367217E-4]:9.036569726199943)[&rate=3.200986896262469E-4]:10.942148086071413)[&rate=2.0605470382454593E-4]:9.625089403610588,20[&rate=3.672530515730287E-4]:113.20380721588194)[&rate=3.488060453093242E-4]:2.577794114992855,19[&rate=1.7638039846317496E-4]:115.78160133087479)[&rate=1.0]:0.0;
tree STATE_2160000 = (((((((1[&rate=1.7307777992339355E-4]:6.531856730753191,(((4[&rate=3.5151740198688364E-4]:4.446209360292748,8[&rate=4.70140802686824E-4]:4.446209360292748)[&rate=2.8972916972318295E-4]:31.53267854269008,5[&rate=2.6381422333976386E-4]:35.97888790298283)[&rate=1.7307777992339355E-4]:23.29283729215782,(((6[&rate=1.4006826566884565E-4]:2.8471995411053017,11[&rate=3.921065836027003E-4]:2.8471995411053017)[&rate=4.4652454928797113E-4]:9.381719573263567,(7[&rate=1.5248017536589087E-4]:8.203266958139311,12[&rate=2.722277189337187E-4]:8.203266958139311)[&rate=1.0003579412683004E-4]:4.025652156229558)[&rate=2.4746040494355E-4]:24.39439037620074,(9[&rate=4.4652454928797113E-4]:7.022932223165968,10[&rate=2.3944431918533732E-4]:7.022932223165968)[&rate=2.8972916972318295E-4]:29.600377267403644)[&rate=2.8085168800291065E-4]:22.648415704571036)[&rate=3.398323529131385E-4]:3.260131535612544)[&rate=5.809376306037641E-4]:4.7312460374123475,16[&rate=4.082083977232408E-4]:1.2631027681655382)[&rate=4.983742954533192E-4]:19.98655554178947,(2[&rate=2.8085168800291065E-4]:17.599999999999994,13[&rate=8.134181078951788E-4]:0.0)[&rate=1.4006826566884565E-4]:3.649658309955015)[&rate=6.533129802436338E-4]:1.4554539061129788,(17[&rate=2.5557118597319513E-4]:20.299999999999997,18[&rate=4.261616068510143E-4]:0.0)[&rate=1.7307777992339355E-4]:2.405112216067991)[&rate=2.8085168800291065E-4]:1.5638647077361298,(3[&rate=1.5248017536589087E-4]:14.695642479534023,(14[&rate=2.2354160476808092E-4]:0.0,15[&rate=1.9093912983316898E-4]:6.099999999999994)[&rate=2.722277189337187E-4]:3.6956424795340297)[&rate=4.082083977232408E-4]:14.473334444270094)[&rate=1.82231697025823E-4]:0.8370872264783031,20[&rate=4.4652454928797113E-4]:91.10606415028242)[&rate=2.6381422333976386E-4]:9.661044142930436,19[&rate=1.4006826566884565E-4]:100.76710829321286)[&rate=1.0]:0.0;
tree STATE_2175000 = (((((((1[&rate=4.731173900125081E-4]:33.368860779472655,2[&rate=3.1263415276443327E-4]:23.368860779472655)[&rate=4.731173900125081E-4]:3.650282929106069,16[&rate=2.2695018183197993E-4]:27.019143708578724)[&rate=2.1734783005784492E-4]:4.81697599976539,3[&rate=3.1263415276443327E-4]:36.73611970834411)[&rate=2.9384639751364126E-4]:5.8460349934998135,(13[&rate=2.8578975016532135E-4]:5.513445465836654,18[&rate=2.4749460039499155E-4]:2.813445465836651)[&rate=1.2941595377921624E-4]:14.56870923600728)[&rate=1.8414110898646324E-4]:4.007615904472772,((((4[&rate=1.93846975563424E-4]:49.74238051011223,(5[&rate=3.0271443620167286E-4]:33.929593891806256,(((6[&rate=2.5889313765509913E-4]:8.897500532027511,((7[&rate=1.738458270861802E-4]:3.202119456103642,11[&rate=3.1263415276443327E-4]:3.202119456103642)[&rate=3.3728330683339985E-4]:5.278085072108784,8[&rate=2.7148033328581995E-4]:8.480204528212425)[&rate=2.1263349361326714E-4]:0.41729600381508547)[&rate=3.1263415276443327E-4]:7.796584799046265,12[&rate=1.4035022233556486E-4]:16.694085331073776)[&rate=2.3188190953452227E-4]:12.592691320519545,(9[&rate=1.8904545543674907E-4]:5.428127590621567,10[&rate=1.93846975563424E-4]:5.428127590621567)[&rate=4.0663952160168695E-4]:23.858649060971754)[&rate=1.738458270861802E-4]:4.642817240212935)[&rate=3.3728330683339985E-4]:15.81278661830597)[&rate=2.7148033328581995E-4]:16.257619489887773,15[&rate=2.7837559707968786E-4]:0.0)[&rate=2.8578975016532135E-4]:5.660194114718436,17[&rate=2.0794867963256397E-4]:5.660194114718436)[&rate=2.4212637190074897E-4]:0.43980588528155806,14[&rate=1.2941595377921624E-4]:0.0)[&rate=2.0327167420912918E-4]:35.589770606316705)[&rate=2.3188190953452227E-4]:3.4078435425886653,20[&rate=4.731173900125081E-4]:111.09761414890536)[&rate=3.3728330683339985E-4]:11.870459718648576,19[&rate=1.2941595377921624E-4]:122.96807386755394)[&rate=1.0]:0.0;
tree STATE_2190000 = ((((((((1[&rate=3.5794852128445687E-4]:13.016713395182038,15[&rate=2.251427903183365E-4]:3.0167133951820375)[&rate=5.456177503482024E-4]:1.0716949913070835,16[&rate=5.715825871235084E-4]:4.088408386489121)[&rate=4.8091178665404517E-4]:14.393700995120199,14[&rate=3.84662957535824E-4]:12.382109381609325)[&rate=2.968126868196639E-4]:0.22165869949225225,13[&rate=6.340008459440629E-4]:1.1037680811015775)[&rate=3.98774435518894E-4]:0.8511730182360964,((4[&rate=3.71079972021321E-4]:2.102676289725834,5[&rate=2.1212969904043703E-4]:2.102676289725834)[&rate=2.6161304215073256E-4]:45.628352470499756,((((6[&rate=2.49728950348847E-4]:7.595228313111662,12[&rate=9.840518279427494E-4]:7.595228313111662)[&rate=4.289470105441843E-4]:0.35850281994155786,(7[&rate=2.6161304215073256E-4]:0.5774334427427029,11[&rate=4.452292490784301E-4]:0.5774334427427029)[&rate=4.6249232489190055E-4]:7.376297690310516)[&rate=0.0012676086372024075]:10.964893482008224,(9[&rate=7.789599467538156E-4]:1.9316879896655705,10[&rate=5.221541528488508E-4]:1.9316879896655705)[&rate=4.289470105441843E-4]:16.986936625395874)[&rate=3.3277005320294436E-4]:1.8023048013144134,8[&rate=0.0012676086372024075]:20.720929416375856)[&rate=2.49728950348847E-4]:27.010099343849735)[&rate=2.49728950348847E-4]:37.82391233911208)[&rate=1.8324526198667857E-4]:8.807751419451819,((2[&rate=5.0070632274562E-4]:25.902670646864266,3[&rate=2.7336892513684865E-4]:30.802670646864264)[&rate=7.789599467538156E-4]:1.3104953265282262,(17[&rate=2.49728950348847E-4]:22.58393749449384,18[&rate=2.7336892513684865E-4]:2.2839374944938413)[&rate=2.7336892513684865E-4]:4.6292284788986535)[&rate=5.221541528488508E-4]:1.149526545396995)[&rate=3.71079972021321E-4]:0.8827591508144934,20[&rate=5.715825871235084E-4]:95.24545166960398)[&rate=3.3277005320294436E-4]:4.035809658440982,19[&rate=2.1212969904043703E-4]:99.28126132804496)[&rate=1.0]:0.0;
tree STATE_2205000 = (((1[&rate=2.53581599664063E-4]:46.39235207925179,(((((2[&rate=4.144458630319609E-4]:8.467791035603454,15[&rate=2.3019121886582965E-4]:8.467791035603454)[&rate=3.298875483440683E-4]:6.001060297541343,3[&rate=1.1628259557853827E-4]:19.368851333144796)[&rate=3.157924497089407E-4]:4.83924590862442,17[&rate=1.9004864999664067E-4]:19.308097241769218)[&rate=1.9636976180435368E-4]:0.9919027582307791,18[&rate=1.1628259557853827E-4]:0.0)[&rate=1.9004864999664067E-4]:14.05308987953947,(((((4[&rate=1.589691011693902E-4]:18.206883388359966,8[&rate=2.53581599664063E-4]:18.206883388359966)[&rate=1.5260922395251086E-4]:31.667382709193486,(5[&rate=1.9636976180435368E-4]:8.448689729987159,12[&rate=4.144458630319609E-4]:8.448689729987159)[&rate=3.6445150465212945E-4]:41.42557636756629)[&rate=1.0668538485889945E-4]:12.914638158878724,(((6[&rate=2.9167861003837785E-4]:0.05191656365183688,11[&rate=1.460886927137949E-4]:0.05191656365183688)[&rate=4.5172861066099083E-4]:8.278306672861465,7[&rate=1.589691011693902E-4]:8.330223236513302)[&rate=2.0279693649010035E-4]:30.875302023518653,(9[&rate=1.460886927137949E-4]:2.491145377629811,10[&rate=1.838042980478343E-4]:2.491145377629811)[&rate=3.298875483440683E-4]:36.71437988240214)[&rate=3.157924497089407E-4]:23.58337899640022)[&rate=1.460886927137949E-4]:9.311095743567819,14[&rate=1.460886927137949E-4]:0.0)[&rate=4.144458630319609E-4]:19.694163638191867,(13[&rate=3.031585404058595E-4]:4.7654443428532005,16[&rate=2.53581599664063E-4]:22.365444342853195)[&rate=2.811298833629594E-4]:3.4287192953386665)[&rate=1.838042980478343E-4]:8.558926241347606)[&rate=1.0668538485889945E-4]:2.0392621997123257)[&rate=1.589691011693902E-4]:1.8142412601146418,20[&rate=3.866657567211576E-4]:104.20659333936644)[&rate=1.6522583083415938E-4]:11.274335346097317,19[&rate=1.1628259557853827E-4]:115.48092868546375)[&rate=1.0]:0.0;
tree STATE_2220000 = ((((((1[&rate=1.5187367978379145E-4]:11.180488309395756,16[&rate=2.1168584799160158E-4]:1.1804883093957557)[&rate=5.2084842058787754E-5]:20.756191081056656,((((4[&rate=3.690738347072508E-4]:5.3380845863498845,5[&rate=4.220250544314221E-4]:5.3380845863498845)[&rate=3.05488897138173E-4]:49.56867519718644,(((6[&rate=5.277562051744434E-4]:5.007946685871078,(7[&rate=2.3943334100954533E-4]:3.0389023146190888,12[&rate=4.220250544314221E-4]:3.0389023146190888)[&rate=3.942354144513167E-4]:1.969044371251989)[&rate=6.287015729396662E-4]:4.585264004722642,8[&rate=8.901429911970467E-4]:9.59321069059372)[&rate=3.942354144513167E-4]:8.691931629220067,((9[&rate=1.5187367978379145E-4]:4.051022107743409,10[&rate=3.461098854281596E-4]:4.051022107743409)[&rate=2.5445330571790067E-4]:8.150690286524835,11[&rate=5.2084842058787754E-5]:12.201712394268245)[&rate=0.002025702930232603]:6.083429925545541)[&rate=2.3943334100954533E-4]:36.62161746372254)[&rate=8.901429911970467E-4]:11.093240216463677,15[&rate=7.728982407598737E-5]:0.0)[&rate=8.832072173443401E-5]:20.299999999999997,18[&rate=0.002025702930232603]:0.0)[&rate=1.7451246810955571E-4]:1.6366793904524144)[&rate=1.4100842521089316E-4]:1.9133514948883317,14[&rate=1.5187367978379145E-4]:17.75003088534075)[&rate=1.864098419403375E-4]:5.855285166154729,(((2[&rate=4.530014370497619E-4]:12.287737454022249,3[&rate=3.461098854281596E-4]:17.187737454022248)[&rate=1.7451246810955571E-4]:11.980470101240883,13[&rate=0.002025702930232603]:6.6682075552631375)[&rate=8.832072173443401E-5]:4.169071897478474,17[&rate=4.530014370497619E-4]:28.437279452741606)[&rate=0.0013209024444086814]:1.2680365987538664)[&rate=6.549195069854831E-5]:0.8453772316159274,20[&rate=6.287015729396662E-4]:96.5506932831114)[&rate=3.3963022990835486E-5]:6.638321987213089,19[&rate=1.6302111561784658E-4]:103.18901527032449)[&rate=1.0]:0.0;
tree STATE_2235000 = (((((1[&rate=5.104934320085698E-4]:33.77605374479269,((16[&rate=5.905211746143503E-4]:16.35020739504995,17[&rate=2.7067491490399793E-4]:16.35020739504995)[&rate=2.0519257865233355E-4]:3.949792604950048,18[&rate=4.064864013298033E-4]:0.0)[&rate=2.383428031042852E-4]:3.4760537447926936)[&rate=2.0519257865233355E-4]:6.082575906526188,((((4[&rate=1.9629269578317615E-4]:57.71835287887429,((((5[&rate=3.7876285290384E-4]:2.4422771117200446,12[&rate=1.3673876526377993E-4]:2.4422771117200446)[&rate=3.1410288399816793E-4]:2.1426509938703786,9[&rate=3.438961406131074E-4]:4.584928105590423)[&rate=2.0519257865233355E-4]:1.4294670501862043,10[&rate=2.6250774408788607E-4]:6.0143951557766275)[&rate=3.66405079157461E-4]:24.50510519339108,((6[&rate=4.2232808902797236E-4]:1.9914433782537786,7[&rate=1.5287411180781637E-4]:1.9914433782537786)[&rate=3.920552632782528E-4]:2.1912624172485193,(8[&rate=1.1103465263238009E-4]:3.323488899135632,11[&rate=5.447602994771765E-4]:3.323488899135632)[&rate=5.104934320085698E-4]:0.8592168963666662)[&rate=5.104934320085698E-4]:26.33679455366541)[&rate=2.0519257865233355E-4]:27.198852529706585)[&rate=1.1103465263238009E-4]:8.281647121125708,15[&rate=3.1410288399816793E-4]:0.0)[&rate=2.7067491490399793E-4]:7.5721735257960745,14[&rate=5.104934320085698E-4]:1.4721735257960802)[&rate=3.2361182487824244E-4]:20.93341151847082,13[&rate=3.548243806857023E-4]:10.9055850442669)[&rate=2.383428031042852E-4]:1.3530446070519844)[&rate=6.602034170685167E-4]:3.590757125140172,(2[&rate=2.544227651392471E-4]:19.095427081349072,3[&rate=6.602034170685167E-4]:23.99542708134907)[&rate=2.4638141010616783E-4]:14.353959695109978)[&rate=3.920552632782528E-4]:7.967032883972976,20[&rate=3.7876285290384E-4]:107.41641966043203)[&rate=1.9629269578317615E-4]:1.5465835449716963,19[&rate=1.657158206270123E-4]:108.96300320540372)[&rate=1.0]:0.0;
tree STATE_2250000 = ((((((1[&rate=5.897464187299506E-4]:10.0,15[&rate=3.576137077825579E-4]:0.0)[&rate=5.119479139850185E-4]:20.63682661845729,(((2[&rate=4.1433698596900605E-4]:6.925314341097845,(((((4[&rate=2.706404434698517E-4]:8.79021198970028,(8[&rate=4.8311962977535665E-4]:4.281095084025738,11[&rate=5.665250295603132E-4]:4.281095084025738)[&rate=4.246008758642956E-4]:4.509116905674542)[&rate=3.946951341889124E-4]:15.889449879743632,5[&rate=4.7014843158893667E-4]:24.679661869443912)[&rate=2.5861334215415677E-4]:0.31876423210785987,12[&rate=6.171732323256905E-4]:24.99842610155177)[&rate=3.394868972771162E-4]:16.79397627184693,((6[&rate=3.6671723554198806E-4]:5.648849622588893,7[&rate=4.246008758642956E-4]:5.648849622588893)[&rate=9.041538045372753E-4]:12.212177099446722,(9[&rate=2.094179521433168E-4]:2.8493656492987824,10[&rate=3.4855157090034106E-4]:2.8493656492987824)[&rate=9.041538045372753E-4]:15.011661072736832)[&rate=2.5861334215415677E-4]:23.931375651363087)[&rate=2.9217243089943283E-4]:24.2075976266013,16[&rate=2.5861334215415677E-4]:0.0)[&rate=2.817337698630991E-4]:6.925314341097845)[&rate=3.211535052855069E-4]:2.5229353736775835,(14[&rate=2.9217243089943283E-4]:0.0,17[&rate=3.576137077825579E-4]:6.099999999999994)[&rate=2.817337698630991E-4]:3.3482497147754344)[&rate=2.817337698630991E-4]:10.851750285224568,18[&rate=4.7014843158893667E-4]:0.0)[&rate=2.094179521433168E-4]:0.33682661845729456)[&rate=3.4855157090034106E-4]:2.1678257808401895,13[&rate=3.117684982001927E-4]:5.204652399297487)[&rate=3.759041522816889E-4]:2.863673719665641,3[&rate=5.462843698444942E-4]:30.56832611896312)[&rate=2.45188983775256E-4]:12.018199386365254,20[&rate=5.119479139850185E-4]:103.68652550532838)[&rate=1.7652885106369146E-4]:6.9539689513206895,19[&rate=1.7652885106369146E-4]:110.64049445664907)[&rate=1.0]:0.0;
tree STATE_2265000 = ((((((((1[&rate=6.584892504514437E-4]:1.657165283698241,(4[&rate=1.843444545252889E-4]:54.03000932748429,(((5[&rate=5.191284329559644E-4]:15.914416028048043,12[&rate=7.305801033114619E-4]:15.914416028048043)[&rate=2.1623467307088626E-4]:3.759990976718287,(9[&rate=4.5743231740119703E-4]:2.58526999709291,10[&rate=2.755248126702882E-4]:2.58526999709291)[&rate=1.7399076216242376E-4]:17.089137007673422)[&rate=6.026596380122655E-4]:10.68746300221811,(6[&rate=6.026596380122655E-4]:5.407280803008167,((7[&rate=7.305801033114619E-4]:1.6237714482600607,11[&rate=4.3174066584921204E-4]:1.6237714482600607)[&rate=1.0893945397857016E-4]:1.4073444897648608,8[&rate=3.6806769428817315E-4]:3.0311159380249215)[&rate=2.0540972326892791E-4]:2.376164864983245)[&rate=3.501080107555505E-4]:24.954589203976273)[&rate=3.176735570314134E-4]:23.668139320499847)[&rate=1.3206292992320515E-4]:3.6271559562139544)[&rate=6.026596380122655E-4]:8.342834716301759,16[&rate=3.874646062307283E-4]:0.0)[&rate=3.6806769428817315E-4]:16.39927323481436,17[&rate=1.0893945397857016E-4]:16.39927323481436)[&rate=2.888632670539174E-4]:3.900726765185638,18[&rate=1.7399076216242376E-4]:0.0)[&rate=1.843444545252889E-4]:2.4054733225216296,(3[&rate=6.584892504514437E-4]:13.258053047904845,(14[&rate=7.305801033114619E-4]:0.0,15[&rate=4.3174066584921204E-4]:6.099999999999994)[&rate=4.3174066584921204E-4]:2.258053047904852)[&rate=4.085719448995249E-4]:14.34742027461678)[&rate=4.8627087741478586E-4]:4.779017398497757,(2[&rate=2.273269822378557E-4]:17.599999999999994,13[&rate=3.333685020505173E-4]:0.0)[&rate=2.505370553536119E-4]:9.88449072101939)[&rate=6.026596380122655E-4]:3.9725438445988175,20[&rate=5.572749911919257E-4]:97.4570345656182)[&rate=2.888632670539174E-4]:8.10645510622949,19[&rate=1.636721449688403E-4]:105.56348967184769)[&rate=1.0]:0.0;
tree STATE_2280000 = (((((((1[&rate=3.6942207716617504E-4]:5.852469938883189,(4[&rate=2.0816292366645687E-4]:59.99178200865383,((5[&rate=1.36667328328794E-4]:13.850534706669155,(9[&rate=4.1444899105952653E-4]:2.77852633527871,10[&rate=2.642729731291596E-4]:2.77852633527871)[&rate=2.8922188719548867E-4]:11.072008371390446)[&rate=2.4708574277691584E-4]:20.28491082365287,(((6[&rate=1.8248319377129244E-4]:2.2784491891705074,8[&rate=2.726441509868026E-4]:2.2784491891705074)[&rate=3.797980998781045E-4]:8.497835234496359,(7[&rate=1.36667328328794E-4]:1.2666479790931504,11[&rate=2.0816292366645687E-4]:1.2666479790931504)[&rate=3.406730292799579E-4]:9.509636444573715)[&rate=2.3811828090076744E-4]:10.031133982016456,12[&rate=5.428300645691291E-4]:20.807418405683322)[&rate=4.4178182869027724E-4]:13.328027124638702)[&rate=2.975188483855705E-4]:25.856336478331805)[&rate=3.499220677137434E-4]:1.8606879302293606)[&rate=3.906934374520052E-4]:21.91456528585941,(2[&rate=4.7454186577909814E-4]:4.121987514714888,3[&rate=2.55775783331236E-4]:9.021987514714887)[&rate=3.797980998781045E-4]:13.645047710027711)[&rate=1.6497794069339584E-4]:3.7591611002434604,13[&rate=3.906934374520052E-4]:3.9261963249860656)[&rate=3.1432978623857947E-4]:3.3232117384392126,((14[&rate=2.642729731291596E-4]:0.0,15[&rate=3.1432978623857947E-4]:6.099999999999994)[&rate=6.192191782678993E-4]:0.26311859568247087,(16[&rate=3.797980998781045E-4]:5.340471491981688,17[&rate=5.428300645691291E-4]:5.340471491981688)[&rate=3.1432978623857947E-4]:1.022647103700777)[&rate=1.36667328328794E-4]:18.486289467742807)[&rate=1.36667328328794E-4]:2.78081880008493,18[&rate=4.4178182869027724E-4]:7.330226863510205)[&rate=4.1444899105952653E-4]:3.1533223974660842,20[&rate=4.1444899105952653E-4]:96.78354926097629)[&rate=1.8248319377129244E-4]:2.2501264893582373,19[&rate=1.36667328328794E-4]:99.03367575033452)[&rate=1.0]:0.0;
tree STATE_2295000 = ((((((1[&rate=1.0573332805441027E-4]:10.0,16[&rate=5.597274658207624E-4]:0.0)[&rate=1.5490254988279913E-4]:17.061891231282786,((((4[&rate=1.753563431016337E-4]:5.997255951199859,(5[&rate=3.707769107279177E-4]:3.597041802870786,12[&rate=1.8210935000259205E-4]:3.597041802870786)[&rate=2.862017350958745E-4]:2.4002141483290735)[&rate=2.7591993616619704E-4]:43.11087232947935,((6[&rate=1.0573332805441027E-4]:14.10541491617244,7[&rate=3.091346540677289E-4]:14.10541491617244)[&rate=3.5251297052169933E-4]:25.432078288064012,(8[&rate=1.8889541898317155E-4]:9.546799577160046,((9[&rate=2.2448591298695464E-4]:2.164130820924743,11[&rate=2.662601317551242E-4]:2.164130820924743)[&rate=1.3294409704528326E-4]:3.834458048044033,10[&rate=1.8210935000259205E-4]:5.998588868968776)[&rate=1.753563431016337E-4]:3.54821070819127)[&rate=3.5251297052169933E-4]:29.99069362707641)[&rate=7.095701286019337E-4]:9.570635076442755)[&rate=2.9722341961542747E-4]:16.89187171932079,15[&rate=9.311676687420904E-5]:0.0)[&rate=7.345293981105969E-5]:6.099999999999994,14[&rate=1.2481278636962135E-4]:0.0)[&rate=1.6179805129548045E-4]:10.961891231282792)[&rate=4.929383469430078E-4]:6.230306399205446,3[&rate=3.221300351308968E-4]:28.19219763048823)[&rate=1.4056973462991682E-4]:7.733375306218548,(((2[&rate=9.311676687420904E-5]:10.86001121393744,17[&rate=1.8210935000259205E-4]:10.86001121393744)[&rate=1.2481278636962135E-4]:9.439988786062557,18[&rate=4.496633021555149E-4]:0.0)[&rate=1.6179805129548045E-4]:7.459578216257825,13[&rate=1.4056973462991682E-4]:10.159578216257827)[&rate=4.496633021555149E-4]:3.2659947204489583)[&rate=7.095701286019337E-4]:0.21503717409046885,20[&rate=4.929383469430078E-4]:97.24061011079725)[&rate=4.496633021555149E-4]:4.4936522269685355,19[&rate=1.1590897388797405E-4]:101.73426233776578)[&rate=1.0]:0.0;
tree STATE_2310000 = (((((((((1[&rate=1.98479682470362E-4]:16.099999999999994,14[&rate=3.1343816000152703E-4]:0.0)[&rate=1.5847673849488157E-4]:5.485173322898177,3[&rate=2.921687482832011E-4]:16.48517332289817)[&rate=2.2586440597681214E-4]:4.365412651576847,17[&rate=2.2586440597681214E-4]:15.950585974475018)[&rate=5.223719629227697E-4]:3.7780494541144094,(((4[&rate=2.820707570257502E-4]:46.14944083964029,((5[&rate=3.1343816000152703E-4]:29.596974473583504,(((6[&rate=2.44066564016798E-4]:4.876828740898448,12[&rate=4.2567919715631654E-4]:4.876828740898448)[&rate=3.9143723726643996E-4]:4.2119812589477945,(7[&rate=4.676006817584437E-4]:0.6430031274723,8[&rate=2.2586440597681214E-4]:0.6430031274723)[&rate=2.44066564016798E-4]:8.445806872373943)[&rate=4.2567919715631654E-4]:2.0661903936914765,11[&rate=2.921687482832011E-4]:11.155000393537719)[&rate=4.2567919715631654E-4]:18.441974080045785)[&rate=2.533011424595631E-4]:1.1973860709880277,(9[&rate=3.4903805886506406E-4]:1.9793953907913457,10[&rate=2.34936133990365E-4]:1.9793953907913457)[&rate=3.622443714424724E-4]:28.814965153780186)[&rate=2.820707570257502E-4]:15.35508029506876)[&rate=2.533011424595631E-4]:32.9112035411152,16[&rate=2.34936133990365E-4]:13.060644380755491)[&rate=1.1678177524205593E-4]:6.385870984323844,15[&rate=3.622443714424724E-4]:19.446515365079335)[&rate=3.365709573700021E-4]:0.2821200635100922)[&rate=9.693775198285621E-4]:0.5713645714105695,18[&rate=2.0769570057219087E-4]:0.0)[&rate=5.578846454821785E-4]:3.9273991665332204,13[&rate=1.98479682470362E-4]:6.627399166533223)[&rate=2.533011424595631E-4]:1.7128597330510758,2[&rate=1.5847673849488157E-4]:25.940258899584293)[&rate=2.1680252113331146E-4]:4.164664715056105,20[&rate=4.4544478292175333E-4]:96.1049236146404)[&rate=2.34936133990365E-4]:8.388881473476303,19[&rate=1.5847673849488157E-4]:104.4938050881167)[&rate=1.0]:0.0;
tree STATE_2325000 = (((((((1[&rate=4.19398569466866E-4]:10.0,16[&rate=2.627195171961498E-4]:0.0)[&rate=2.3843694299290045E-4]:6.333502594624832,14[&rate=2.8684406909042475E-4]:0.2335025946248379)[&rate=6.597857743925743E-4]:16.11829773477973,13[&rate=2.5470301727103395E-4]:4.851800329404568)[&rate=2.5470301727103395E-4]:3.3867101815303897,18[&rate=5.944937290016391E-4]:5.538510510934955)[&rate=3.926145589899441E-4]:3.9951621157768074,((2[&rate=2.70721558791504E-4]:21.169886669753822,15[&rate=4.0547203202783355E-4]:21.169886669753822)[&rate=3.6938363256208234E-4]:8.34808234441499,((3[&rate=4.515733635655416E-4]:22.096475602628125,17[&rate=1.8137561482056445E-4]:17.196475602628126)[&rate=1.2477089300573253E-4]:11.939698388256488,(4[&rate=2.3843694299290045E-4]:48.82064809948525,(((5[&rate=2.3007097718733818E-4]:12.820499893301621,((6[&rate=2.70721558791504E-4]:6.273423316535673,8[&rate=3.5874447271053053E-4]:6.273423316535673)[&rate=5.188745322301426E-4]:0.20830632328965137,7[&rate=2.8684406909042475E-4]:6.481729639825325)[&rate=5.513426537421005E-4]:6.338770253476296)[&rate=3.6938363256208234E-4]:18.440779364074473,11[&rate=8.014698812380917E-4]:31.261279257376096)[&rate=1.2477089300573253E-4]:1.951287761670308,((9[&rate=3.486218596618466E-4]:2.8336590205297045,10[&rate=2.627195171961498E-4]:2.8336590205297045)[&rate=3.6938363256208234E-4]:28.660734940010595,12[&rate=3.033763907217978E-4]:31.4943939605403)[&rate=2.4662641292213865E-4]:1.7181730585061032)[&rate=4.19398569466866E-4]:15.608081080438843)[&rate=2.5470301727103395E-4]:46.31552589139937)[&rate=5.944937290016391E-4]:0.381795023284198)[&rate=2.5470301727103395E-4]:0.3157036125429471)[&rate=2.3007097718733818E-4]:1.220687494576751,20[&rate=4.927014018733332E-4]:97.05436012128851)[&rate=2.7875025374945583E-4]:11.876515695558226,19[&rate=1.515645178790637E-4]:108.93087581684674)[&rate=1.0]:0.0;
tree STATE_2340000 = (((((1[&rate=3.587385176326898E-4]:26.413784208694636,17[&rate=3.0887735319685576E-4]:16.413784208694636)[&rate=2.0672329344842855E-4]:7.6487155674776375,(2[&rate=1.4348977623567915E-4]:0.0,3[&rate=1.9931006819824782E-4]:4.899999999999999)[&rate=3.1999424039646623E-4]:24.062499776172274)[&rate=1.6096127706124032E-4]:1.681355344663217,(((((((4[&rate=2.61416857462493E-4]:39.35769696944151,(5[&rate=4.109700448892296E-4]:29.09711519335411,(((6[&rate=2.1416352663811632E-4]:0.914385296833925,8[&rate=6.118897254443989E-4]:0.914385296833925)[&rate=2.1416352663811632E-4]:2.177894984880414,7[&rate=2.0672329344842855E-4]:3.0922802817143387)[&rate=5.411785673115516E-4]:12.518492632255946,(9[&rate=3.1999424039646623E-4]:1.6574077856940055,(10[&rate=2.8852221557322647E-4]:0.35628756326451866,11[&rate=2.2927268573707748E-4]:0.35628756326451866)[&rate=6.118897254443989E-4]:1.3011202224294869)[&rate=7.695477191832443E-4]:13.953365128276278)[&rate=2.1416352663811632E-4]:13.486342279383827)[&rate=3.587385176326898E-4]:10.260581776087403)[&rate=2.1416352663811632E-4]:15.9111187544571,12[&rate=3.3189624516854804E-4]:55.26881572389861)[&rate=1.9931006819824782E-4]:12.616035503783976,16[&rate=1.222337085297089E-4]:1.8848512276825886)[&rate=1.3358488350213537E-4]:4.215148772317406,14[&rate=2.7910015316839264E-4]:0.0)[&rate=1.5251456643531464E-4]:1.6710968182425603,15[&rate=3.587385176326898E-4]:7.771096818242555)[&rate=1.0810814515841464E-4]:12.528903181757443,18[&rate=1.6901411529400036E-4]:0.0)[&rate=4.3373078916591026E-4]:2.523065708459086,13[&rate=4.109700448892296E-4]:5.223065708459089)[&rate=2.700847466713073E-4]:2.9207894123764078)[&rate=2.9842031560009665E-4]:11.601951735289305,20[&rate=3.741606694867451E-4]:103.3458068561248)[&rate=3.0887735319685576E-4]:0.9143300276458035,19[&rate=1.4348977623567915E-4]:104.2601368837706)[&rate=1.0]:0.0;
tree STATE_2355000 = ((((((1[&rate=8.716168443375732E-4]:27.489240579161788,17[&rate=1.9096953188328105E-4]:17.489240579161788)[&rate=1.9096953188328105E-4]:9.58973523126241,(2[&rate=8.716168443375732E-4]:25.824776664964787,((4[&rate=2.497300072543843E-4]:6.6014784874176335,(8[&rate=1.989703290146923E-4]:0.29492330434221853,11[&rate=4.30689442904325E-4]:0.29492330434221853)[&rate=8.716168443375732E-4]:6.306555183075415)[&rate=1.2180720742091292E-4]:76.00668997805403,((5[&rate=3.0058792571555613E-4]:21.46999196476511,((6[&rate=3.124507050581336E-4]:4.000075180211777,7[&rate=1.9096953188328105E-4]:4.000075180211777)[&rate=4.575866192496821E-4]:16.967783683558885,12[&rate=1.5866838727424533E-4]:20.96785886377066)[&rate=1.413690170810299E-4]:0.502133100994449)[&rate=1.3200288350232622E-4]:3.6405985614830527,(9[&rate=3.535069271071268E-4]:2.531898136491448,10[&rate=1.5019771591459507E-4]:2.531898136491448)[&rate=3.875838158684874E-4]:22.578692389756714)[&rate=1.1023785875785276E-4]:57.497577939223504)[&rate=1.9096953188328105E-4]:9.216608199493123)[&rate=3.696764427975937E-4]:1.2541991454594097)[&rate=2.5903403160864376E-4]:6.040267987004668,((((3[&rate=3.535069271071268E-4]:9.637430829423216,15[&rate=2.894065253765169E-4]:4.737430829423218)[&rate=2.4074093707450377E-4]:1.3625691705767764,14[&rate=3.387376507384231E-4]:0.0)[&rate=1.7498699701613794E-4]:6.626185284588956,16[&rate=2.7880690481640197E-4]:12.72618528458895)[&rate=7.421675133174154E-5]:10.969468509908538,18[&rate=2.7880690481640197E-4]:3.395653794497491)[&rate=2.894065253765169E-4]:9.423590002931377)[&rate=2.6870615101385687E-4]:8.965465834393228,13[&rate=5.310734230136593E-4]:24.4847096318221)[&rate=2.152068165704476E-4]:19.82658415814899,20[&rate=3.875838158684874E-4]:127.91129378997108)[&rate=3.387376507384231E-4]:14.593388977984219,19[&rate=1.2180720742091292E-4]:142.5046827679553)[&rate=1.0]:0.0;
tree STATE_2370000 = ((((((1[&rate=3.294667103465158E-4]:8.934482861443897,((4[&rate=3.077602264975924E-4]:10.612606276743692,5[&rate=5.739585982456741E-4]:10.612606276743692)[&rate=2.1109052023249233E-4]:37.54157672101549,(((6[&rate=3.077602264975924E-4]:3.024613260467829,8[&rate=3.5970843903545006E-4]:3.024613260467829)[&rate=1.6660044307563977E-4]:2.782491786487447,7[&rate=5.406946821851486E-4]:5.807105046955276)[&rate=3.5970843903545006E-4]:15.610665726132261,(((9[&rate=5.153090254886179E-4]:1.890300267155142,10[&rate=4.6159942749561804E-4]:1.890300267155142)[&rate=2.539978509295103E-4]:6.797513759106813,11[&rate=4.353428693740868E-4]:8.687814026261956)[&rate=5.406946821851486E-4]:5.808304913193583,12[&rate=5.406946821851486E-4]:14.496118939455538)[&rate=3.3682061900040973E-4]:6.921651833631998)[&rate=3.5970843903545006E-4]:26.736412224671643)[&rate=3.294667103465158E-4]:16.780299863684718)[&rate=1.9436264083896082E-4]:28.312954214987883,13[&rate=7.272322741697857E-4]:9.647437076431785)[&rate=3.4428880857200145E-4]:1.9172238363237568,(2[&rate=2.858496889639872E-4]:4.269073201785176,3[&rate=2.783029828185424E-4]:9.169073201785174)[&rate=5.406946821851486E-4]:24.89558771097036)[&rate=4.031445894008601E-4]:2.7022556850178745,((14[&rate=4.6159942749561804E-4]:1.9073059211651469,((15[&rate=6.233565183752373E-4]:2.923188579207917,17[&rate=4.031445894008601E-4]:2.923188579207917)[&rate=4.353428693740868E-4]:2.7990505615120753,16[&rate=2.858496889639872E-4]:5.722239140719992)[&rate=4.1316523071417607E-4]:2.285066780445149)[&rate=2.624726372667383E-4]:16.023356818107217,18[&rate=3.760381400390392E-4]:3.7306627392723613)[&rate=3.8466318898843925E-4]:7.836253858501053)[&rate=3.294667103465158E-4]:9.054307760244697,20[&rate=4.946044871789006E-4]:106.92122435801811)[&rate=2.539978509295103E-4]:3.6355037675459414,19[&rate=1.6660044307563977E-4]:110.55672812556405)[&rate=1.0]:0.0;
tree STATE_2385000 = (((((((1[&rate=4.61015271673278E-4]:23.56499091864596,(3[&rate=3.287019837675762E-4]:15.167802528522735,16[&rate=2.6134026064907154E-4]:10.267802528522736)[&rate=2.542315715302444E-4]:3.2971883901232246)[&rate=1.049010550464505E-4]:11.114475845600097,(((4[&rate=1.8579009964026438E-4]:63.68933789127221,((((6[&rate=1.8579009964026438E-4]:0.02704162941183534,8[&rate=2.839159742639637E-4]:0.02704162941183534)[&rate=1.6177461796002064E-4]:1.2676969457217708,11[&rate=2.1358023381921846E-4]:1.2947385751336062)[&rate=2.202773372933044E-4]:2.344894910446374,7[&rate=1.7033593714794738E-4]:3.63963348557998)[&rate=2.761429122565452E-4]:34.943704612943115,(9[&rate=3.778686091769835E-4]:3.665558328254992,10[&rate=2.4042690269758564E-4]:3.665558328254992)[&rate=3.6375766439818125E-4]:34.9177797702681)[&rate=2.336674218215338E-4]:25.105999792749117)[&rate=3.004451626275022E-4]:15.772187959690434,(5[&rate=3.004451626275022E-4]:50.33547746882253,12[&rate=2.2696161258631509E-4]:50.33547746882253)[&rate=2.2696161258631509E-4]:29.126048382140112)[&rate=2.6863157775827874E-4]:1.3801332324408264,(14[&rate=4.121517028373356E-4]:0.0,15[&rate=3.287019837675762E-4]:6.099999999999994)[&rate=2.202773372933044E-4]:8.741659083403476)[&rate=1.6177461796002064E-4]:9.837807680842587)[&rate=2.202773372933044E-4]:15.266023491580725,17[&rate=1.929972985340921E-4]:39.94549025582678)[&rate=2.839159742639637E-4]:2.433815387665547,(13[&rate=1.2733666149430722E-4]:23.202441052914224,18[&rate=2.4042690269758564E-4]:20.50244105291422)[&rate=3.510407086013374E-4]:1.5768645905781113)[&rate=2.4042690269758564E-4]:14.095243817020688,2[&rate=2.0683213406700172E-4]:56.47454946051302)[&rate=1.7827810355072144E-4]:0.4606974906998431,20[&rate=3.937906290883685E-4]:122.93524695121286)[&rate=1.9998890393549195E-4]:17.949389813724935,19[&rate=1.049010550464505E-4]:140.8846367649378)[&rate=1.0]:0.0;
tree STATE_2400000 = ((((((1[&rate=4.2271702305950176E-4]:12.651646559857056,(4[&rate=2.6413187098410826E-4]:44.99047151263636,((((5[&rate=9.528970732787475E-5]:4.885696131065846,12[&rate=4.8584166261734314E-4]:4.885696131065846)[&rate=2.1133614858103182E-4]:4.741368343071913,(6[&rate=3.962955698882545E-4]:4.8510012463401315,7[&rate=2.791891568345731E-4]:4.8510012463401315)[&rate=1.665701277137747E-4]:4.776063227797628)[&rate=2.1133614858103182E-4]:10.313118945081657,(8[&rate=2.1133614858103182E-4]:12.451747640458121,11[&rate=3.123507461071163E-4]:12.451747640458121)[&rate=1.8821455220957835E-4]:7.4884357787612945)[&rate=5.698467707667219E-4]:8.384314892186282,(9[&rate=3.123507461071163E-4]:4.087193188425404,10[&rate=5.244731907792723E-4]:4.087193188425404)[&rate=3.7244555893147527E-4]:24.237305122980295)[&rate=1.0569873426921518E-4]:16.665973201230663)[&rate=5.244731907792723E-4]:23.661175047220695)[&rate=1.4594560172123905E-4]:1.466488480346797,16[&rate=6.927401241936619E-4]:4.118135040203853)[&rate=2.3643827875379463E-4]:1.981864959796141,14[&rate=3.962955698882545E-4]:0.0)[&rate=3.9887440035779176E-5]:20.09552824470009,((((2[&rate=3.7244555893147527E-4]:6.769373124065737,3[&rate=1.358693763171172E-4]:11.669373124065736)[&rate=1.2586154039753548E-4]:9.518393133254293,(15[&rate=3.962955698882545E-4]:16.17919380913628,17[&rate=1.77236651386236E-4]:16.17919380913628)[&rate=9.528970732787475E-5]:0.10857244818375023)[&rate=3.307810549708675E-4]:4.158742173609625,18[&rate=1.77236651386236E-4]:0.14650843092965715)[&rate=9.528970732787475E-5]:0.6701174234559488,13[&rate=1.77236651386236E-4]:3.516625854385609)[&rate=1.9956101686205522E-4]:5.078902390314482)[&rate=9.528970732787475E-5]:0.16909663998484348,20[&rate=6.245202853665146E-4]:92.36462488468493)[&rate=2.6413187098410826E-4]:0.2339522580393094,19[&rate=1.9956101686205522E-4]:92.59857714272424)[&rate=1.0]:0.0;
tree STATE_2415000 = (((((((1[&rate=1.740989438405897E-4]:22.197141735365093,2[&rate=2.007616390753715E-4]:12.197141735365093)[&rate=2.8094725224711434E-4]:0.9914882246513059,((((4[&rate=3.1209092286612076E-4]:19.43357351704244,5[&rate=2.1283064612163716E-4]:19.43357351704244)[&rate=1.1320740463975855E-4]:45.22401460203685,((6[&rate=2.3642342906372643E-4]:12.007024838811118,(7[&rate=3.993962117657741E-4]:1.6282563152010852,8[&rate=1.740989438405897E-4]:1.6282563152010852)[&rate=1.4744980123528067E-4]:10.378768523610033)[&rate=2.956983478035898E-4]:18.2623238620357,((9[&rate=2.956983478035898E-4]:5.441269097656322,(10[&rate=3.663925004724916E-4]:1.3031676309762275,11[&rate=3.663925004724916E-4]:1.3031676309762275)[&rate=3.3085261242242427E-4]:4.138101466680094)[&rate=1.66307317910286E-4]:0.9999008616656191,12[&rate=2.4238969622890043E-4]:6.441169959321941)[&rate=4.504754309997769E-4]:23.82817874152488)[&rate=2.4238969622890043E-4]:34.38823941823247)[&rate=1.9451760175243478E-4]:5.864036454045433,16[&rate=5.867329347727733E-4]:4.5216245731247255)[&rate=1.880544040504595E-4]:1.9489263537822268,17[&rate=3.2111517386511227E-4]:6.470550926906952)[&rate=3.663925004724916E-4]:6.718079033109447)[&rate=2.608933670018979E-4]:1.616373392690079,(14[&rate=5.867329347727733E-4]:0.0,15[&rate=2.5459640283538256E-4]:6.099999999999994)[&rate=1.812878611779376E-4]:8.705003352706484)[&rate=2.608933670018979E-4]:5.494996647293519,18[&rate=2.740319155298106E-4]:0.0)[&rate=1.1320740463975855E-4]:4.125274609385784,(3[&rate=3.3085261242242427E-4]:24.96510157869961,13[&rate=2.740319155298106E-4]:2.465101578699617)[&rate=2.0684949877266144E-4]:4.36017303068617)[&rate=1.9451760175243478E-4]:17.142271120617096,20[&rate=4.939747714009912E-4]:107.56754573000288)[&rate=3.3085261242242427E-4]:2.9027568815547227,19[&rate=1.3446539501179317E-4]:110.4703026115576)[&rate=1.0]:0.0;
tree STATE_2430000 = ((((((1[&rate=1.7130476770124415E-4]:26.44216873878841,((((3[&rate=4.4644622608099315E-4]:4.899999999999999,15[&rate=3.4324008422777387E-4]:0.0)[&rate=3.703018206659378E-4]:8.96456844579015,(14[&rate=2.8423893127172247E-4]:0.0,17[&rate=2.601281113383719E-4]:6.099999999999994)[&rate=1.7130476770124415E-4]:2.8645684457901552)[&rate=1.4208758784987042E-4]:1.287202591204192,(4[&rate=2.1282579500089282E-4]:65.73503653344254,((5[&rate=1.5409225437144666E-4]:29.90771088487429,((9[&rate=3.4324008422777387E-4]:2.9649564869489,10[&rate=3.703018206659378E-4]:2.9649564869489)[&rate=1.8481077905350697E-4]:24.963248582872826,12[&rate=2.7172468576923766E-4]:27.928205069821725)[&rate=4.4644622608099315E-4]:1.9795058150525655)[&rate=1.8481077905350697E-4]:11.007122788269562,((6[&rate=3.137681922960822E-4]:6.119368963869532,(7[&rate=2.1802157199125134E-4]:0.4066565746096159,8[&rate=1.2212314320147688E-4]:0.4066565746096159)[&rate=1.4208758784987042E-4]:5.7127123892599165)[&rate=3.882151784186381E-4]:11.990462368546854,11[&rate=1.5409225437144666E-4]:18.109831332416388)[&rate=2.2830786097788683E-4]:22.805002340727466)[&rate=1.6340027617395384E-4]:24.820202860298686)[&rate=2.980581717937909E-4]:10.516734503551803)[&rate=2.8423893127172247E-4]:2.0821243733668098,16[&rate=1.908667761522407E-4]:12.333895410361151)[&rate=2.231730434839171E-4]:4.108273328427259)[&rate=2.6583100243912015E-4]:3.88991253839734,13[&rate=4.4644622608099315E-4]:2.732081277185756)[&rate=1.9662687300958504E-4]:1.6686820037528491,18[&rate=2.980581717937909E-4]:1.7007632809386024)[&rate=2.0755426796702066E-4]:7.076073948394821,2[&rate=2.438585627756754E-4]:29.07683722933342)[&rate=2.0755426796702066E-4]:8.391535242474959,20[&rate=5.194303528846539E-4]:103.46837247180838)[&rate=3.882151784186381E-4]:0.9786492480160689,19[&rate=2.231730434839171E-4]:104.44702171982445)[&rate=1.0]:0.0;
tree STATE_2445000 = ((((((((1[&rate=2.6476946287616615E-4]:16.099999999999994,14[&rate=2.896101764369199E-4]:0.0)[&rate=8.410986073986749E-5]:0.19911712523759206,(15[&rate=2.6476946287616615E-4]:2.943939200508183,16[&rate=2.0541848505899196E-4]:2.943939200508183)[&rate=1.8870944397791561E-4]:3.3551779247294036)[&rate=1.969331482974711E-4]:3.748652676585877,17[&rate=2.896101764369199E-4]:10.047769801823463)[&rate=2.896101764369199E-4]:19.19049476006687,((4[&rate=6.660603090259915E-4]:12.176787507474213,5[&rate=2.767482759751839E-4]:12.176787507474213)[&rate=1.5012815231826507E-4]:25.838011954709774,(((6[&rate=5.075110864335807E-4]:1.9517421241085007,7[&rate=2.0541848505899196E-4]:1.9517421241085007)[&rate=4.2805783644720476E-4]:10.58436611628691,11[&rate=4.2805783644720476E-4]:12.53610824039541)[&rate=2.896101764369199E-4]:12.823382771034712,(((8[&rate=6.660603090259915E-4]:1.1274946760139342,9[&rate=1.8870944397791561E-4]:1.1274946760139342)[&rate=2.5354046575999287E-4]:4.7180253943213035,10[&rate=2.1421014339534011E-4]:5.845520070335238)[&rate=4.2805783644720476E-4]:0.48993610900975604,12[&rate=3.186975898966618E-4]:6.335456179344994)[&rate=4.629522637586486E-4]:19.02403483208513)[&rate=3.354161460790125E-4]:12.655308450753864)[&rate=1.275421482839925E-4]:57.223465099706345)[&rate=4.2805783644720476E-4]:3.688895115389613,2[&rate=4.2805783644720476E-4]:32.927159677279946)[&rate=3.994166035616102E-4]:11.73318538405826,((3[&rate=1.969331482974711E-4]:32.593667948301864,13[&rate=6.660603090259915E-4]:10.09366794830187)[&rate=4.629522637586486E-4]:11.089991253732862,18[&rate=1.969331482974711E-4]:18.48365920203473)[&rate=1.969331482974711E-4]:5.876685859303478)[&rate=5.688450783130541E-4]:0.5289913983493051,20[&rate=5.075110864335807E-4]:111.18933645968751)[&rate=3.540540248127903E-4]:3.259174816489889,19[&rate=1.8870944397791561E-4]:114.4485112761774)[&rate=1.0]:0.0;
tree STATE_2460000 = ((((((1[&rate=1.2298112322848623E-4]:21.020761786536397,(2[&rate=1.652069860700137E-4]:5.118962256314248,3[&rate=2.0990899592014979E-4]:10.018962256314246)[&rate=0.0011210671412409774]:5.901799530222149)[&rate=3.852090585174249E-4]:6.6017177767876944,(((4[&rate=2.9672771110296866E-4]:29.85017073681376,((5[&rate=0.003120439582763757]:3.0011645570996004,12[&rate=8.911178802229055E-4]:3.0011645570996004)[&rate=7.903126831957418E-5]:9.258219090790622,((6[&rate=0.0015443503684082023]:1.8291856877125434,(7[&rate=3.168460492981396E-4]:1.2458831892150768,8[&rate=6.79194856090956E-4]:1.2458831892150768)[&rate=2.4232502326599796E-4]:0.5833024984974666)[&rate=5.814518230153937E-4]:10.354653049121824,((9[&rate=1.9457242249611452E-4]:0.9790379851304205,10[&rate=6.79194856090956E-4]:0.9790379851304205)[&rate=4.113264915212055E-4]:3.357156653284684,11[&rate=7.903126831957418E-5]:4.336194638415105)[&rate=0.0012932839723449779]:7.847644098419263)[&rate=7.903126831957418E-5]:0.07554491105585548)[&rate=2.4232502326599796E-4]:17.590787088923534)[&rate=2.9672771110296866E-4]:36.14982926318624,17[&rate=3.381828529719906E-4]:0.0)[&rate=6.18365748932113E-5]:15.77327557827607,((14[&rate=6.27282976586979E-4]:4.883818586236799,16[&rate=3.609052536889287E-4]:10.983818586236794)[&rate=2.4232502326599796E-4]:1.5314139478082467,15[&rate=8.911178802229055E-4]:12.51523253404504)[&rate=1.7970096099896997E-4]:3.25804304423103)[&rate=5.036705112006803E-4]:1.849203985048021)[&rate=0.003120439582763757]:0.7233687114536735,13[&rate=2.0990899592014979E-4]:0.7458482747777708)[&rate=2.9672771110296866E-4]:1.954151725222232,18[&rate=4.113264915212055E-4]:0.0)[&rate=6.18365748932113E-5]:1.3733490373095663,20[&rate=5.814518230153937E-4]:87.67334903730956)[&rate=3.852090585174249E-4]:1.118485348787118,19[&rate=1.509970255017653E-4]:88.79183438609668)[&rate=1.0]:0.0;
tree STATE_2475000 = (((((((1[&rate=6.685730972752432E-4]:28.17766668962237,(14[&rate=4.819649828800395E-4]:0.0,(15[&rate=2.701175613868389E-4]:3.761607658081431,16[&rate=0.0010184234569270015]:3.761607658081431)[&rate=2.701175613868389E-4]:2.3383923419185635)[&rate=2.5831877509038337E-4]:12.077666689622376)[&rate=6.259196479092733E-4]:0.31869369246321355,(((4[&rate=2.5831877509038337E-4]:5.776772536120114,5[&rate=0.0010184234569270015]:5.776772536120114)[&rate=3.3236586832941097E-4]:29.496120316765,(((6[&rate=2.9418890004795806E-4]:4.397659779011551,8[&rate=3.065787338944678E-4]:4.397659779011551)[&rate=8.764015987218369E-4]:0.5062752280874916,7[&rate=1.7283237326928678E-4]:4.903935007099043)[&rate=4.231995292607356E-4]:18.67272706889702,(((9[&rate=6.259196479092733E-4]:0.9345873144005232,10[&rate=7.8620699994364E-4]:0.9345873144005232)[&rate=4.819649828800395E-4]:18.04733373497283,12[&rate=9.235899438463381E-5]:18.981921049373355)[&rate=2.820545946140509E-4]:1.3825394176271644,11[&rate=6.685730972752432E-4]:20.36446046700052)[&rate=4.060966735445051E-4]:3.212201608995546)[&rate=4.231995292607356E-4]:11.696230776889049)[&rate=1.7283237326928678E-4]:30.727107147114886,17[&rate=4.4140604830206605E-4]:0.0)[&rate=3.458930812263185E-4]:18.496360382085584)[&rate=4.4140604830206605E-4]:1.8036396179144134,18[&rate=3.5993956159119714E-4]:0.0)[&rate=1.8621838737069917E-4]:3.3639339974575506,13[&rate=8.764015987218369E-4]:6.0639339974575535)[&rate=2.701175613868389E-4]:0.2602505128019601,(2[&rate=0.0013480073580656386]:18.96065090087383,3[&rate=7.8620699994364E-4]:23.86065090087383)[&rate=0.0013480073580656386]:4.963533609385678)[&rate=6.685730972752432E-4]:7.981406554152713,20[&rate=5.30057289652965E-4]:97.90559106441222)[&rate=5.896431636304583E-4]:1.2085728419772153,19[&rate=1.7283237326928678E-4]:99.11416390638944)[&rate=1.0]:0.0;
tree STATE_2490000 = ((((1[&rate=2.331894562055561E-4]:27.471827825142256,(2[&rate=3.368588929677249E-4]:15.342411510565753,3[&rate=2.616632738267463E-4]:20.242411510565752)[&rate=3.9827147493681417E-4]:2.1294163145765026)[&rate=5.701869812136416E-4]:16.54368453025701,((((4[&rate=2.1417341481771632E-4]:59.457797403537285,((5[&rate=2.0706901819513303E-4]:17.189550851911775,((8[&rate=2.4481967082340086E-4]:1.131560030950508,(9[&rate=3.0859144243221265E-4]:1.06175871683887,10[&rate=4.3271056486025405E-4]:1.06175871683887)[&rate=2.960983158527538E-4]:0.06980131411163804)[&rate=3.0224568074378E-4]:3.0225872739403847,11[&rate=3.630993205164416E-4]:4.154147304890893)[&rate=2.8426540592658343E-4]:13.035403547020882)[&rate=2.504793248056655E-4]:18.79497498584518,((6[&rate=2.1417341481771632E-4]:6.287999054073305,7[&rate=2.504793248056655E-4]:6.287999054073305)[&rate=4.939800662321773E-4]:3.4758801469729104,12[&rate=2.960983158527538E-4]:9.763879201046215)[&rate=2.2712706587551797E-4]:26.22064663671074)[&rate=3.220418647515411E-4]:23.47327156578033)[&rate=2.2712706587551797E-4]:7.185749781235032,15[&rate=2.0706901819513303E-4]:0.6435471847723164)[&rate=1.446362088358403E-4]:25.296093449777302,17[&rate=3.1517485080806125E-4]:25.93964063454962)[&rate=2.331894562055561E-4]:7.978210850097227,((13[&rate=4.574387756539175E-4]:2.3110780650076066,(14[&rate=1.446362088358403E-4]:0.0,16[&rate=1.8028572932498273E-4]:6.099999999999994)[&rate=1.669494154274876E-4]:13.811078065007607)[&rate=3.292474672481562E-4]:0.38892193499239625,18[&rate=3.220418647515411E-4]:0.0)[&rate=3.0224568074378E-4]:13.617851484646849)[&rate=4.3271056486025405E-4]:0.09766087075242069)[&rate=3.0859144243221265E-4]:7.3356656025039655,20[&rate=4.574387756539175E-4]:107.35117795790323)[&rate=2.8426540592658343E-4]:3.475063825326629,19[&rate=1.446362088358403E-4]:110.82624178322986)[&rate=1.0]:0.0;
tree STATE_2505000 = ((((((1[&rate=4.0924154897579757E-4]:16.537158106558053,3[&rate=1.844825837636795E-4]:11.437158106558051)[&rate=2.841110385259852E-4]:12.217965751104458,(((4[&rate=1.9660907652918405E-4]:58.227711276024166,((5[&rate=1.468394957329008E-4]:3.435586522364912,12[&rate=1.1424130305461854E-4]:3.435586522364912)[&rate=1.784390202217939E-4]:40.372633829436744,(((6[&rate=1.9660907652918405E-4]:10.213509980755545,7[&rate=2.0275171972168198E-4]:10.213509980755545)[&rate=4.0924154897579757E-4]:6.8599291620378064,8[&rate=2.1533860506621073E-4]:17.07343914279335)[&rate=1.3979489811509962E-4]:25.639420789537983,((9[&rate=3.3021576708877837E-4]:1.9796835890800386,10[&rate=2.0275171972168198E-4]:1.9796835890800386)[&rate=6.11794013283165E-4]:18.25033669534392,11[&rate=1.9052903038404266E-4]:20.230020284423958)[&rate=2.3542687728094722E-4]:22.482839647907376)[&rate=4.0924154897579757E-4]:1.0953604194703246)[&rate=2.0275171972168198E-4]:14.419490924222508)[&rate=2.1533860506621073E-4]:7.772288723975834,16[&rate=1.9660907652918405E-4]:0.0)[&rate=2.941237149053033E-4]:4.284881604380814,15[&rate=1.0213633646270424E-4]:4.284881604380814)[&rate=2.7480369319694104E-4]:14.470242253281697)[&rate=1.468394957329008E-4]:1.750623195752297,((14[&rate=2.5785429769437893E-4]:0.0,17[&rate=2.0275171972168198E-4]:6.099999999999994)[&rate=3.8339602062830986E-4]:14.200000000000003,18[&rate=3.3021576708877837E-4]:0.0)[&rate=1.468394957329008E-4]:0.20574705341481092)[&rate=1.3979489811509962E-4]:4.502320600337967,(2[&rate=1.9052903038404266E-4]:17.599999999999994,13[&rate=1.5352536250985076E-4]:0.0)[&rate=2.0275171972168198E-4]:7.408067653752781)[&rate=1.3979489811509962E-4]:4.582087390742927,20[&rate=6.11794013283165E-4]:95.5901550444957)[&rate=4.963610121975082E-4]:5.892302691417271,19[&rate=1.2387915028581653E-4]:101.48245773591297)[&rate=1.0]:0.0;
tree STATE_2520000 = (((((((1[&rate=3.9957969899806473E-4]:38.49871639672094,17[&rate=5.187816691307199E-4]:28.498716396720937)[&rate=1.6129403635756732E-4]:0.9499216396210954,16[&rate=3.8032686684427296E-4]:29.448638036342032)[&rate=3.8032686684427296E-4]:0.36440385165923317,(2[&rate=3.633588373758845E-4]:25.80338174570042,(((4[&rate=3.336768521821732E-4]:52.01315803328256,(((5[&rate=3.9957969899806473E-4]:12.509419521844006,12[&rate=3.7160908974236286E-4]:12.509419521844006)[&rate=5.187816691307199E-4]:13.453910945655057,(8[&rate=2.685697620095551E-4]:11.644990378051283,(9[&rate=5.608529444294748E-4]:1.0678959636817162,(10[&rate=2.549619635777537E-4]:0.5175537903328797,11[&rate=3.201512642063506E-4]:0.5175537903328797)[&rate=1.6129403635756732E-4]:0.5503421733488365)[&rate=3.135884022783427E-4]:10.577094414369567)[&rate=3.47965673863178E-4]:14.31834008944778)[&rate=2.943391068025402E-4]:10.979062218095464,(6[&rate=4.104031420402991E-4]:5.318056756385067,7[&rate=3.201512642063506E-4]:5.318056756385067)[&rate=3.135884022783427E-4]:31.624335929209458)[&rate=3.8032686684427296E-4]:15.070765347688031)[&rate=3.2683672579731396E-4]:13.986841966717442,15[&rate=3.0071124485175037E-4]:0.0)[&rate=2.751243734666758E-4]:6.099999999999994,14[&rate=2.751243734666758E-4]:0.0)[&rate=3.0071124485175037E-4]:19.703381745700426)[&rate=3.47965673863178E-4]:4.009660142300845)[&rate=3.2683672579731396E-4]:2.778883112676553,18[&rate=2.0169793417798744E-4]:12.291925000677821)[&rate=2.1339771537714624E-4]:9.303771921826907,(3[&rate=3.8960897969352065E-4]:31.73341446742682,13[&rate=3.071180651886283E-4]:9.233414467426826)[&rate=3.407067275212466E-4]:15.062282455077906)[&rate=4.104031420402991E-4]:2.985471443349553,20[&rate=4.2230338547491583E-4]:110.88116836585428)[&rate=3.135884022783427E-4]:8.728420008606108,19[&rate=1.6129403635756732E-4]:119.60958837446039)[&rate=1.0]:0.0;
tree STATE_2535000 = (((((((1[&rate=2.4089623891995602E-4]:16.099999999999994,14[&rate=3.127430874314938E-4]:0.0)[&rate=3.32051084336334E-4]:1.0730346822071795,((((4[&rate=2.6309859969015265E-4]:55.47089296842752,((((6[&rate=1.992202678298955E-4]:1.2522767058077384,12[&rate=7.14331208134451E-4]:1.2522767058077384)[&rate=4.28576388745213E-4]:0.23872407057569434,8[&rate=5.01933314228114E-4]:1.4910007763834328)[&rate=6.619109770474844E-4]:5.708367416402587,7[&rate=6.224992288292701E-4]:7.19936819278602)[&rate=3.6173621545548953E-4]:20.12840895562025,((9[&rate=3.127430874314938E-4]:1.1480120878511624,11[&rate=5.408970430530369E-4]:1.1480120878511624)[&rate=1.992202678298955E-4]:6.108200374379039,10[&rate=4.8507870873568354E-4]:7.256212462230201)[&rate=5.640415818062358E-4]:20.071564686176067)[&rate=3.0309273053355144E-4]:28.14311582002125)[&rate=4.4143408269830056E-4]:0.25028565900748845,5[&rate=3.516844367031306E-4]:55.72117862743501)[&rate=4.0465041881829574E-4]:10.278821372564991,16[&rate=4.695238132345935E-4]:0.0)[&rate=4.0465041881829574E-4]:4.167138521750516,15[&rate=2.1499757450553535E-4]:4.167138521750516)[&rate=4.8507870873568354E-4]:3.0058961604566576)[&rate=4.4143408269830056E-4]:11.531110171056952,(3[&rate=3.418044417313508E-4]:21.582041901718135,17[&rate=5.01933314228114E-4]:16.682041901718137)[&rate=5.01933314228114E-4]:2.022102951545989)[&rate=3.6173621545548953E-4]:1.5958551467358717,18[&rate=4.4143408269830056E-4]:0.0)[&rate=3.0309273053355144E-4]:1.3195393345543351,(2[&rate=1.992202678298955E-4]:17.747897179383642,13[&rate=2.523027719837248E-4]:0.14789717938364788)[&rate=3.720065115505099E-4]:3.87164215517069)[&rate=3.223793997371514E-4]:4.627829843398928,20[&rate=5.408970430530369E-4]:92.24736917795326)[&rate=3.720065115505099E-4]:4.762825752417683,19[&rate=1.7929169038493844E-4]:97.01019493037094)[&rate=1.0]:0.0;
tree STATE_2550000 = (((((((1[&rate=5.89754002460415E-4]:5.100000000000001,3[&rate=0.001007946520077043]:0.0)[&rate=2.611988390472133E-4]:15.468252743620077,2[&rate=2.4512433518465655E-4]:10.568252743620079)[&rate=3.540554920735788E-4]:4.728515697269955,(14[&rate=8.15476700523856E-4]:0.0,(15[&rate=2.1469289854376503E-4]:2.41044091349427,16[&rate=2.1469289854376503E-4]:2.41044091349427)[&rate=8.15476700523856E-4]:3.6895590865057244)[&rate=1.7211427099327937E-4]:9.19676844089004)[&rate=4.247045435917764E-4]:7.669410544265006,((((4[&rate=3.33428403682765E-4]:19.846684712801192,5[&rate=0.0016990408906666463]:19.846684712801192)[&rate=1.8600683903194633E-4]:27.254874359189593,((6[&rate=2.2965022056627032E-4]:7.703654457161854,(7[&rate=3.13961885610084E-4]:1.1452571902222743,11[&rate=4.519627957300015E-4]:1.1452571902222743)[&rate=4.552585219961719E-5]:6.55839726693958)[&rate=4.247045435917764E-4]:27.189668202704596,(((8[&rate=4.8160113294454574E-4]:2.488863115718173,9[&rate=3.7600792627363915E-4]:2.488863115718173)[&rate=2.1469289854376503E-4]:2.9213848148105344,10[&rate=1.8600683903194633E-4]:5.4102479305287074)[&rate=2.955144635764633E-4]:18.93121781531377,12[&rate=2.1469289854376503E-4]:24.341465745842477)[&rate=4.247045435917764E-4]:10.551856914023972)[&rate=5.140520102533182E-4]:12.208236412124336)[&rate=1.4476459899022672E-4]:38.74346519165265,13[&rate=3.994801340972728E-4]:2.245024263643444)[&rate=0.0013547164766286304]:0.45497573635655897,18[&rate=4.519627957300015E-4]:0.0)[&rate=1.5840252454219988E-4]:2.6661789851550424)[&rate=2.4512433518465655E-4]:5.49713216771751,17[&rate=5.498652183558103E-4]:28.46331115287255)[&rate=5.89754002460415E-4]:0.6403289658116904,20[&rate=5.89754002460415E-4]:95.10364011868424)[&rate=1.1712144958661673E-4]:8.866240389732695,19[&rate=1.1712144958661673E-4]:103.96988050841694)[&rate=1.0]:0.0;
tree STATE_2565000 = ((((((((1[&rate=8.610013455583143E-5]:27.209349077674347,(15[&rate=1.9163430215707317E-4]:12.925168882148398,16[&rate=1.4925885369685942E-4]:12.925168882148398)[&rate=3.768945976875639E-4]:4.284180195525948)[&rate=3.768945976875639E-4]:2.316339336133723,(4[&rate=2.2709372167919488E-4]:49.89442072012304,((((5[&rate=1.428955205556358E-4]:2.2020517658703405,7[&rate=2.3748195042305005E-4]:2.2020517658703405)[&rate=1.997616837420328E-4]:2.215249690490646,8[&rate=1.5576549748879675E-4]:4.4173014563609865)[&rate=1.6244694661350173E-4]:5.033734315455632,6[&rate=3.063908325064848E-4]:9.451035771816619)[&rate=2.7442269134586914E-4]:24.185137114574587,((9[&rate=4.616383874794018E-4]:2.8631265603229963,12[&rate=2.89430570742969E-4]:2.8631265603229963)[&rate=1.4925885369685942E-4]:0.008799789088531629,(10[&rate=1.693364664310829E-4]:1.8386289925462351,11[&rate=5.392221068014596E-4]:1.8386289925462351)[&rate=9.956987582965622E-5]:1.0332973568652928)[&rate=3.259085672636744E-4]:30.76424653697968)[&rate=1.9163430215707317E-4]:16.25824783373183)[&rate=1.3047580650883282E-4]:35.63126769368503)[&rate=5.392221068014596E-4]:0.7743115861919279,18[&rate=7.865173044721776E-5]:0.0)[&rate=4.125869245310818E-4]:11.007604979059536,(2[&rate=1.3047580650883282E-4]:18.5984506752543,13[&rate=1.1211903252294411E-4]:0.9984506752543041)[&rate=2.0833031767255897E-4]:12.709154303805235)[&rate=1.997616837420328E-4]:2.0250113193728367,(3[&rate=1.1825070082621535E-4]:8.528245012238564,17[&rate=2.1741206481574383E-4]:3.6282450122385654)[&rate=4.616383874794018E-4]:29.704371286193805)[&rate=3.768945976875639E-4]:9.59898532295928,14[&rate=7.029457786526291E-5]:36.831601621391655)[&rate=9.956987582965622E-5]:6.818768221978104,20[&rate=4.616383874794018E-4]:115.75036984336975)[&rate=3.259085672636744E-4]:13.499306663568944,19[&rate=7.029457786526291E-5]:129.2496765069387)[&rate=1.0]:0.0;
tree STATE_2580000 = (((((1[&rate=7.181625673583527E-5]:25.89267673217381,3[&rate=1.4452818101154578E-4]:20.79267673217381)[&rate=2.3933500694720943E-4]:1.0160642893376917,((2[&rate=4.3643540588317857E-4]:10.062277382480815,((14[&rate=8.27083985255037E-4]:0.0,16[&rate=1.6046761001736956E-4]:6.099999999999994)[&rate=2.669679464447199E-4]:0.16068857496240696,17[&rate=7.181625673583527E-5]:6.260688574962401)[&rate=5.585801439550533E-4]:3.8015888075184137)[&rate=1.2715048713717248E-4]:3.5803445810355186,((4[&rate=2.3078729157364656E-4]:46.271238451930216,((((5[&rate=2.573715191255194E-4]:3.969532613365743,12[&rate=9.273119749729996E-5]:3.969532613365743)[&rate=1.6817757156476396E-4]:5.8299123153905335,(6[&rate=1.8341080091685845E-4]:8.167502876020391,7[&rate=2.7703536466409554E-4]:8.167502876020391)[&rate=4.1097919735410307E-4]:1.6319420527358854)[&rate=3.109315554265911E-4]:2.83741082005778,8[&rate=3.892082178187342E-4]:12.636855748814057)[&rate=1.6817757156476396E-4]:25.53844384918049,((9[&rate=4.3643540588317857E-4]:1.9971629369724975,11[&rate=1.6046761001736956E-4]:1.9971629369724975)[&rate=4.1097919735410307E-4]:1.9483561394079973,10[&rate=2.573715191255194E-4]:3.945519076380495)[&rate=3.109315554265911E-4]:34.22978052161405)[&rate=5.059265973322735E-4]:8.095938853935671)[&rate=3.531866661797993E-4]:19.728761548069784,15[&rate=3.378583996724285E-4]:0.0)[&rate=3.238526604226499E-4]:13.642621963516333)[&rate=1.4452818101154578E-4]:3.2661190579951693)[&rate=1.0633760700228739E-4]:16.783318058240738,(13[&rate=5.585801439550533E-4]:14.60992046890199,18[&rate=4.1097919735410307E-4]:11.909920468901987)[&rate=1.910326397900682E-4]:1.4821386108502566)[&rate=3.109315554265911E-4]:1.0235766823058725,20[&rate=5.585801439550533E-4]:100.71563576205811)[&rate=1.3609820611821028E-4]:9.71711116701924,19[&rate=1.1740453287171854E-4]:110.43274692907735)[&rate=1.0]:0.0;
tree STATE_2595000 = (((((((((((1[&rate=8.420505536589051E-4]:12.982285739295392,((4[&rate=3.464276376137149E-4]:38.34748929174442,(5[&rate=2.1187285695537748E-4]:13.22436750229763,12[&rate=2.304511616191518E-4]:13.22436750229763)[&rate=3.8957201188776115E-4]:25.123121789446785)[&rate=4.883089239659076E-4]:2.028245160118722,((6[&rate=5.465597770128698E-4]:1.8273524243037846,(7[&rate=2.867286351652645E-4]:0.7310081344891217,8[&rate=3.464276376137149E-4]:0.7310081344891217)[&rate=0.0011675681606989666]:1.096344289814663)[&rate=3.2596677528243934E-4]:24.51712625323094,(9[&rate=1.319091919569563E-4]:2.5646997762127177,(10[&rate=3.464276376137149E-4]:1.3197549559175992,11[&rate=6.916369062268774E-4]:1.3197549559175992)[&rate=2.1187285695537748E-4]:1.2449448202951185)[&rate=4.12490383433008E-4]:23.77977890132201)[&rate=2.6774004364638515E-4]:14.031255774328411)[&rate=1.0677024929484784E-4]:28.606551287432254)[&rate=3.6759175862128126E-4]:0.8176909091572497,17[&rate=6.507871414130285E-4]:3.799976648452642)[&rate=6.916369062268774E-4]:2.3000233515473525,14[&rate=1.7384401316237867E-4]:0.0)[&rate=6.507871414130285E-4]:0.013043571665264153,3[&rate=2.304511616191518E-4]:11.013043571665257)[&rate=0.0011675681606989666]:0.5766819135676542,16[&rate=0.002111549363966665]:6.689725485232913)[&rate=4.883089239659076E-4]:9.114248134358945,15[&rate=5.787136783687945E-4]:15.803973619591858)[&rate=9.783012175121181E-4]:2.5984220510015916,2[&rate=2.304511616191518E-4]:18.40239567059345)[&rate=2.6774004364638515E-4]:3.3714249402331973,13[&rate=7.862857919968577E-4]:4.1738206108266525)[&rate=2.6774004364638515E-4]:1.3065435149722617,18[&rate=8.420505536589051E-4]:2.7803641257989113)[&rate=3.2596677528243934E-4]:3.4248701212957684,20[&rate=5.465597770128698E-4]:92.50523424709468)[&rate=1.930942103235597E-4]:13.939920199386421,19[&rate=1.930942103235597E-4]:106.4451544464811)[&rate=1.0]:0.0;
tree STATE_2610000 = (((((((1[&rate=4.944621148895779E-4]:21.78366666574952,(((4[&rate=1.0649259439417865E-4]:16.2899714483506,5[&rate=3.2332443550614514E-4]:16.2899714483506)[&rate=8.057099797676538E-4]:15.16487519987561,(((6[&rate=3.513276384427714E-4]:8.121468209742464,(11[&rate=1.9038013455008164E-5]:3.4473789625901405,12[&rate=2.1244053881429322E-4]:3.4473789625901405)[&rate=2.3149426438044273E-4]:4.674089247152323)[&rate=0.0028192428332263616]:0.06683981664779814,(7[&rate=8.057099797676538E-4]:3.9411314245103073,8[&rate=8.198216257008652E-5]:3.9411314245103073)[&rate=7.01881428761881E-5]:4.247176601879954)[&rate=0.0013709389425521693]:5.078080554276376,(9[&rate=8.057099797676538E-4]:1.287118902180039,10[&rate=8.057099797676538E-4]:1.287118902180039)[&rate=0.001023176527883718]:11.979269678486599)[&rate=3.2332443550614514E-4]:18.188458067559573)[&rate=4.666126938808961E-5]:39.403825832518194,16[&rate=7.23818790862101E-4]:4.858672480744403)[&rate=3.8196566032401184E-4]:6.924994185005119)[&rate=1.9038013455008164E-5]:5.736694731171966,14[&rate=1.3293887861045312E-4]:11.420361396921493)[&rate=1.946026914435502E-4]:8.720380153056169,((2[&rate=4.666126938808961E-5]:9.888895015461912,3[&rate=5.937761993272704E-4]:14.788895015461911)[&rate=7.01881428761881E-5]:7.711104984538082,13[&rate=1.620537476635139E-4]:0.0)[&rate=2.976071332924448E-4]:8.640741549977662)[&rate=1.0649259439417865E-4]:4.329501028120589,(15[&rate=7.23818790862101E-4]:27.893854722645017,18[&rate=7.23818790862101E-4]:7.59385472264502)[&rate=1.3293887861045312E-4]:2.6763878554532283)[&rate=0.0013709389425521693]:4.105498251192515,17[&rate=4.666126938808961E-5]:34.67574082929076)[&rate=2.519170395913541E-4]:13.684096350747552,20[&rate=4.529439574548272E-4]:114.35983718003831)[&rate=9.035713602601627E-4]:10.865838248773812,19[&rate=5.85009134622953E-5]:125.22567542881212)[&rate=1.0]:0.0;
tree STATE_2625000 = (((((1[&rate=3.405712865079598E-4]:25.305910141219144,((14[&rate=2.3485841038971286E-4]:2.961440906993843,16[&rate=4.046466620274162E-4]:9.061440906993838)[&rate=3.116615559854969E-4]:0.2286293063951632,15[&rate=3.714822909874361E-4]:9.290070213389)[&rate=8.003977532765421E-4]:6.015839927830143)[&rate=0.0011767878997282614]:6.157873016610324,(((((4[&rate=1.3000313267776744E-4]:7.407368841380462,5[&rate=5.664808502728576E-4]:7.407368841380462)[&rate=6.715076741084805E-4]:9.034639366832478,12[&rate=0.0014727673025148338]:16.44200820821294)[&rate=6.715076741084805E-4]:3.3807689322239938,(((6[&rate=0.0011767878997282614]:2.457399492896895,11[&rate=5.664808502728576E-4]:2.457399492896895)[&rate=3.116615559854969E-4]:2.1102743683570133,7[&rate=2.3485841038971286E-4]:4.567673861253908)[&rate=0.0010621429685210432]:7.166412960005639,(8[&rate=2.8453277122896876E-4]:1.873051629140034,(9[&rate=0.001670092758280729]:0.6404502667129298,10[&rate=0.0014727673025148338]:0.6404502667129298)[&rate=0.004655475976039555]:1.2326013624271042)[&rate=3.405712865079598E-4]:9.861035192119513)[&rate=0.0011767878997282614]:8.088690319177386)[&rate=1.4936488285253186E-4]:56.351550879924964,17[&rate=8.767116986771388E-4]:10.174328020361898)[&rate=1.1110295309531713E-4]:10.1256719796381,18[&rate=1.4936488285253186E-4]:0.0)[&rate=0.0033931375544013235]:1.1637831578294708)[&rate=7.351697512819396E-5]:2.538262618309389,((2[&rate=2.8453277122896876E-4]:10.552833726301344,3[&rate=3.405712865079598E-4]:15.452833726301343)[&rate=6.715076741084805E-4]:7.04716627369865,13[&rate=1.3000313267776744E-4]:0.0)[&rate=5.664808502728576E-4]:6.402045776138863)[&rate=2.589900281760026E-4]:2.324512376442911,20[&rate=6.715076741084805E-4]:92.32655815258177)[&rate=8.003977532765421E-4]:6.2834396573346964,19[&rate=9.240990455732412E-5]:98.60999780991646)[&rate=1.0]:0.0;
tree STATE_2640000 = (((((((1[&rate=6.933042334383593E-5]:22.348044825666932,(((4[&rate=1.3573809880531576E-4]:23.627721965886032,(5[&rate=3.9776507906884155E-4]:17.893442223767934,12[&rate=2.809456923342811E-4]:17.893442223767934)[&rate=2.2904202098403503E-4]:5.7342797421180975)[&rate=3.4508066281209747E-4]:24.32312467648343,((6[&rate=4.281851235502729E-4]:7.536237743639165,7[&rate=2.7661984711392703E-5]:7.536237743639165)[&rate=2.4526504822275895E-4]:31.02806150004543,((8[&rate=3.9776507906884155E-4]:17.2569977597028,11[&rate=6.933042334383593E-5]:17.2569977597028)[&rate=1.8542014236179458E-4]:5.656450097633012,(9[&rate=2.137287467413242E-4]:8.39812000510602,10[&rate=1.2433764097681408E-4]:8.39812000510602)[&rate=4.281851235502729E-4]:14.515327852229792)[&rate=7.212995566372713E-4]:15.650851386348783)[&rate=5.001033340592884E-4]:9.386547398684868)[&rate=4.460562818658633E-5]:19.599275452605404,16[&rate=7.212995566372713E-4]:1.550122094974867)[&rate=2.809456923342811E-4]:10.797922730692065)[&rate=4.460562818658633E-5]:7.951955174333065,18[&rate=2.7661984711392703E-5]:0.0)[&rate=3.9776507906884155E-4]:3.6420788361905068,(14[&rate=1.8542014236179458E-4]:0.0,17[&rate=9.164681421073517E-4]:6.099999999999994)[&rate=5.001033340592884E-4]:17.84207883619051)[&rate=0.0010637993254667248]:4.204171421956673,(13[&rate=9.138543428134317E-5]:8.083290345990918,15[&rate=9.164681421073517E-4]:25.683290345990912)[&rate=0.0016534607982423646]:2.462959912156265)[&rate=4.6204800418517093E-4]:1.7544832473463998,(2[&rate=4.460562818658633E-5]:16.43145866547627,3[&rate=1.022510784996704E-4]:21.33145866547627)[&rate=7.212995566372713E-4]:13.469274840017306)[&rate=2.137287467413242E-4]:1.854625881510401,20[&rate=5.001033340592884E-4]:97.75535938700398)[&rate=9.164681421073517E-4]:1.0840009649752176,19[&rate=1.7224712754140253E-4]:98.8393603519792)[&rate=1.0]:0.0;
tree STATE_2655000 = ((((((1[&rate=6.576384438847481E-4]:26.761082558437835,(2[&rate=4.4951152798917813E-4]:11.6997196345892,3[&rate=3.056601141459026E-4]:16.5997196345892)[&rate=1.9489969223951355E-4]:5.061362923848634)[&rate=6.576384438847481E-4]:7.867131536915224,(((((4[&rate=2.7849673214456474E-4]:35.03346873174224,(5[&rate=5.020712211257476E-4]:9.62516706924477,12[&rate=2.6565497235962195E-4]:9.62516706924477)[&rate=1.2324098798340168E-4]:25.408301662497472)[&rate=1.364342865071615E-4]:25.705704669518532,((((6[&rate=5.682708499653187E-4]:5.113824463774966,7[&rate=9.12193981981272E-5]:5.113824463774966)[&rate=6.576384438847481E-4]:1.611943904592625,8[&rate=9.008603660746518E-4]:6.725768368367591)[&rate=6.584499483195453E-5]:2.378574437635649,11[&rate=3.5136328432367457E-4]:9.10434280600324)[&rate=5.330368397974383E-4]:14.027291342885034,(9[&rate=4.744500060151126E-4]:3.7870452969516273,10[&rate=3.6834818339955195E-4]:3.7870452969516273)[&rate=6.576384438847481E-4]:19.344588851936646)[&rate=1.364342865071615E-4]:37.6075392523725)[&rate=3.35336275989029E-4]:5.260826598739229,16[&rate=4.4951152798917813E-4]:0.0)[&rate=6.584499483195453E-5]:6.099999999999994,14[&rate=3.201383561383346E-4]:0.0)[&rate=2.5321466029645855E-4]:10.374227080478548,17[&rate=1.0862230170709513E-4]:16.474227080478542)[&rate=2.6565497235962195E-4]:8.153987014874517)[&rate=2.1768858057424664E-4]:1.3038718804174323,(15[&rate=0.0014861194344302157]:20.299999999999997,18[&rate=2.5321466029645855E-4]:0.0)[&rate=4.267659666929101E-4]:5.632085975770494)[&rate=9.008603660746518E-4]:5.612944902117491,13[&rate=9.008603660746518E-4]:13.945030877887987)[&rate=2.411132179380052E-4]:5.767732433760884,20[&rate=5.020712211257476E-4]:103.31276331164887)[&rate=7.940014769510293E-4]:2.0398446721254118,19[&rate=1.606479928614015E-4]:105.35260798377428)[&rate=1.0]:0.0;
tree STATE_2670000 = ((((1[&rate=6.506724993285075E-4]:39.400168510607685,(14[&rate=0.0016720191060176823]:1.0193922970354805,15[&rate=2.9735627765498736E-4]:7.119392297035475)[&rate=1.8589490785943087E-4]:22.28077621357221)[&rate=2.3247198373326674E-4]:0.22324830800612006,((2[&rate=7.444950035600846E-4]:6.287981629816883,17[&rate=0.00243788561766751]:6.287981629816883)[&rate=6.624448932748944E-5]:23.024009946556973,((3[&rate=4.596918161962624E-4]:22.477116310296715,((4[&rate=2.3247198373326674E-4]:45.52742409260983,((((6[&rate=5.131942630722752E-4]:1.0771340756191006,11[&rate=0.00243788561766751]:1.0771340756191006)[&rate=3.146888018864536E-4]:4.516044591094686,7[&rate=5.756327619983502E-4]:5.593178666713786)[&rate=0.0010494887690284352]:0.8612217477322854,12[&rate=2.0143844376725162E-4]:6.454400414446072)[&rate=0.0010494887690284352]:9.21009531816434,(8[&rate=4.3552209928340743E-4]:9.169998615422895,(9[&rate=2.9735627765498736E-4]:2.453939873161175,10[&rate=3.912511070339825E-4]:2.453939873161175)[&rate=0.0010494887690284352]:6.716058742261719)[&rate=3.326426395539902E-4]:6.494497117187517)[&rate=3.146888018864536E-4]:29.862928359999415)[&rate=2.9735627765498736E-4]:16.495330987538736,5[&rate=8.017163196902668E-4]:62.02275508014856)[&rate=2.3247198373326674E-4]:21.554361230148153)[&rate=3.7081123563405006E-4]:11.388992482926028,(13[&rate=1.1820874740616394E-4]:8.714411196292062,(16[&rate=0.0010494887690284352]:20.299999999999997,18[&rate=9.492995713438758E-4]:0.0)[&rate=2.169208483723318E-4]:6.014411196292059)[&rate=3.912511070339825E-4]:2.6516975969306884)[&rate=6.506724993285075E-4]:0.34588278315111154)[&rate=9.65877047696296E-5]:0.31142524223994883)[&rate=3.7081123563405006E-4]:0.985352822967215,20[&rate=5.756327619983502E-4]:96.60876964158102)[&rate=9.492995713438758E-4]:6.482302997307585,19[&rate=1.3680063283398966E-4]:103.0910726388886)[&rate=1.0]:0.0;
tree STATE_2685000 = ((((1[&rate=3.2977621704279026E-4]:35.025728857837976,((3[&rate=1.8298847994920506E-4]:22.499999999999993,13[&rate=3.2977621704279026E-4]:0.0)[&rate=2.5281520356729945E-4]:2.700000000000003,18[&rate=3.3961317065133925E-4]:0.0)[&rate=2.025817113496867E-4]:4.725728857837979)[&rate=3.3961317065133925E-4]:11.378004117377088,(2[&rate=4.2747953327002176E-4]:27.830614451228953,((((4[&rate=2.4477231427446526E-4]:64.10248263079774,((((5[&rate=3.607407508703945E-4]:22.570324309128537,(6[&rate=3.0237051689439187E-4]:3.9087103137750314,7[&rate=3.203281075549347E-4]:3.9087103137750314)[&rate=3.607407508703945E-4]:18.661613995353505)[&rate=4.1184336387297137E-4]:7.318004758397116,8[&rate=2.8534725112650764E-4]:29.888329067525653)[&rate=2.770821191639426E-4]:0.63069649640628,((9[&rate=2.6893030286458076E-4]:3.532894196813169,10[&rate=2.770821191639426E-4]:3.532894196813169)[&rate=5.926689204570168E-4]:0.7958855433562286,11[&rate=2.8534725112650764E-4]:4.328779740169398)[&rate=5.478601088781787E-4]:26.190245823762535)[&rate=2.284867143059834E-4]:9.015644158818219,12[&rate=2.8534725112650764E-4]:39.53466972275015)[&rate=2.770821191639426E-4]:24.567812908047586)[&rate=2.3668020052007615E-4]:1.8975173692022622,16[&rate=4.872115301156667E-4]:0.0)[&rate=2.2012922186059154E-4]:7.449660064426382,(14[&rate=1.9314144104454737E-4]:0.0,15[&rate=2.3668020052007615E-4]:6.099999999999994)[&rate=1.9314144104454737E-4]:1.3496600644263879)[&rate=1.8298847994920506E-4]:8.9133443102305,17[&rate=3.2977621704279026E-4]:16.36300437465688)[&rate=3.11210027970171E-4]:11.467610076572072)[&rate=2.6085419180675514E-4]:8.57311852398611)[&rate=2.025817113496867E-4]:1.1553739120441122,20[&rate=4.872115301156667E-4]:103.55910688725918)[&rate=6.607346313750744E-4]:2.8110726217458932,19[&rate=1.5877454304081962E-4]:106.37017950900507)[&rate=1.0]:0.0;
tree STATE_2700000 = ((((((((1[&rate=3.1513078937992254E-4]:10.0,16[&rate=3.430740315502035E-4]:0.0)[&rate=3.2862218122266273E-4]:4.509522176270352,(((4[&rate=3.5866778699010174E-4]:29.406567081552232,(5[&rate=4.967630575989237E-4]:4.807581370955509,12[&rate=1.3920829507497014E-4]:4.807581370955509)[&rate=2.3806997944455716E-4]:24.598985710596722)[&rate=2.4777728778838093E-4]:12.306322326471758,((6[&rate=3.5866778699010174E-4]:9.484723289180403,7[&rate=2.2864096346822621E-4]:9.484723289180403)[&rate=3.5866778699010174E-4]:22.954779855022238,(8[&rate=2.4777728778838093E-4]:12.928266901315427,(9[&rate=9.157049638333513E-5]:11.10789995737323,(10[&rate=1.5774843666625712E-4]:11.041720321320005,11[&rate=3.1513078937992254E-4]:11.041720321320005)[&rate=4.150047881432763E-4]:0.0661796360532243)[&rate=9.157049638333513E-5]:1.8203669439421972)[&rate=4.6521664685927617E-4]:19.511236242887215)[&rate=7.551945335655133E-4]:9.273386263821351)[&rate=1.0633356080145967E-4]:24.28711059197601,15[&rate=2.6823158520636857E-4]:0.0)[&rate=6.927415581196029E-5]:4.509522176270352)[&rate=2.1944392815645715E-4]:1.5904778237296426,14[&rate=2.3806997944455716E-4]:0.0)[&rate=1.4864803048523256E-4]:3.679842187758169,17[&rate=9.98258838292994E-4]:9.779842187758163)[&rate=1.6663310949728306E-4]:14.028364190042225,((2[&rate=1.0633356080145967E-4]:5.792705404087172,3[&rate=2.01570308286233E-4]:10.692705404087171)[&rate=1.840976732531189E-4]:14.507294595912825,18[&rate=4.967630575989237E-4]:0.0)[&rate=9.98258838292994E-4]:3.5082063778003914)[&rate=2.6823158520636857E-4]:7.947857582646563,13[&rate=3.2862218122266273E-4]:14.156063960446957)[&rate=3.2862218122266273E-4]:18.90389463769047,20[&rate=4.3837859674565957E-4]:116.65995859813742)[&rate=1.7539261852769975E-4]:5.5779970914004195,19[&rate=2.01570308286233E-4]:122.23795568953784)[&rate=1.0]:0.0;
tree STATE_2715000 = ((((1[&rate=8.612587461543917E-4]:28.425564402841147,(2[&rate=3.191311964342841E-4]:9.462764697348945,3[&rate=4.2057525220823343E-4]:14.362764697348943)[&rate=2.131042995199242E-4]:8.962799705492202)[&rate=4.919986321085284E-4]:22.468966525020875,((((4[&rate=2.131042995199242E-4]:43.82668133312497,((5[&rate=5.810764725047473E-4]:2.6440081332587604,12[&rate=4.2057525220823343E-4]:2.6440081332587604)[&rate=3.587825721069818E-4]:33.55747442078794,((6[&rate=3.4830573459990584E-4]:3.9672297444785594,(7[&rate=2.8356250513532995E-4]:0.018371707961480993,8[&rate=2.492943255927418E-4]:0.018371707961480993)[&rate=3.0997318298562314E-4]:3.9488580365170782)[&rate=3.382454664315646E-4]:18.734600395758417,((9[&rate=4.524683477766279E-4]:2.0750231173015488,10[&rate=3.697492509110493E-4]:2.0750231173015488)[&rate=4.2057525220823343E-4]:18.143487059689445,11[&rate=2.492943255927418E-4]:20.218510176990993)[&rate=2.317223389778617E-4]:2.4833199632459824)[&rate=3.0997318298562314E-4]:13.499652413809724)[&rate=2.131042995199242E-4]:7.625198779078268)[&rate=2.225957933611836E-4]:31.9263099581472,(14[&rate=1.2173696270534439E-4]:3.5393291424916526,17[&rate=2.0309354751749123E-4]:9.639329142491647)[&rate=2.0309354751749123E-4]:0.11366214878052006)[&rate=1.4938015189643606E-4]:9.54143489520726,(15[&rate=2.0309354751749123E-4]:3.910555414025012,16[&rate=4.065581362964721E-4]:3.910555414025012)[&rate=8.612587461543917E-4]:15.383870772454415)[&rate=1.4938015189643606E-4]:14.835866976199057,(13[&rate=3.697492509110493E-4]:9.827596728776157,18[&rate=3.812928715847812E-4]:7.127596728776155)[&rate=3.4830573459990584E-4]:6.702696433902332)[&rate=1.4938015189643606E-4]:6.7642377651835375)[&rate=3.191311964342841E-4]:0.9546405134299363,20[&rate=5.162499012984101E-4]:107.84917144129196)[&rate=3.0997318298562314E-4]:9.04155805490359,19[&rate=1.4938015189643606E-4]:116.89072949619555)[&rate=1.0]:0.0;
tree STATE_2730000 = (((((1[&rate=2.996054664590527E-4]:27.599999999999994,13[&rate=2.717195239849003E-4]:0.0)[&rate=3.4724668103645076E-4]:13.10797018553896,((((4[&rate=2.3279992896639437E-4]:1.6379338525017606,5[&rate=1.4055916983081332E-4]:1.6379338525017606)[&rate=1.983768794571686E-4]:75.85211153817863,(((6[&rate=2.8977377332504295E-4]:7.8799877699075624,7[&rate=1.3138513238265673E-4]:7.8799877699075624)[&rate=2.996054664590527E-4]:2.5848081826559772,11[&rate=3.101102094294606E-4]:10.46479595256354)[&rate=3.7939660309062686E-4]:17.06532898440576,(8[&rate=2.805074355629443E-4]:20.302738832289855,((9[&rate=3.7939660309062686E-4]:3.5599414084987084,10[&rate=3.3372459011185714E-4]:3.5599414084987084)[&rate=8.667129508871492E-5]:5.566813603690095,12[&rate=2.400772009347236E-4]:9.126755012188804)[&rate=3.991941601917424E-4]:11.17598382010105)[&rate=3.4724668103645076E-4]:7.2273861046794465)[&rate=1.7116016005410675E-4]:49.95992045371109)[&rate=1.5665611399862483E-4]:9.172097837664722,18[&rate=3.214243263840184E-4]:0.3621432283451185)[&rate=4.91911951875153E-4]:0.1737435212837255,((14[&rate=4.228453936943144E-4]:0.0,15[&rate=2.475653551151508E-4]:6.099999999999994)[&rate=1.6404161668295093E-4]:1.6376254281953493,16[&rate=2.805074355629443E-4]:7.737625428195344)[&rate=1.0760353833991118E-4]:13.098261321433498)[&rate=6.857495026885195E-4]:9.872083435910113)[&rate=2.400772009347236E-4]:10.638655419095272,((2[&rate=3.101102094294606E-4]:0.0,3[&rate=1.208240565773868E-4]:4.899999999999999)[&rate=2.805074355629443E-4]:24.957366612979243,17[&rate=1.4055916983081332E-4]:24.957366612979243)[&rate=3.623153606156419E-4]:16.389258991654984)[&rate=1.780953494752515E-4]:8.779081771931942,20[&rate=4.228453936943144E-4]:116.12570737656617)[&rate=2.8977377332504295E-4]:0.8262380948283692,19[&rate=1.849107009823742E-4]:116.95194547139454)[&rate=1.0]:0.0;
tree STATE_2745000 = (((((((((1[&rate=2.4308657010035817E-4]:10.0,15[&rate=1.0828193973037577E-4]:0.0)[&rate=1.1547754316271369E-4]:18.649185596247207,2[&rate=1.9032116320079483E-4]:18.649185596247207)[&rate=2.3441419237031104E-4]:3.828637056068601,13[&rate=2.97573790272706E-4]:4.877822652315814)[&rate=2.6223295280920257E-4]:4.244561090531661,(4[&rate=1.286924337070527E-4]:80.04425764167472,(((5[&rate=1.6519928597864654E-4]:8.3723393965753,12[&rate=1.7131099190504227E-4]:8.3723393965753)[&rate=1.6519928597864654E-4]:21.685742821226093,(9[&rate=2.729498408598503E-4]:6.321898239475994,(10[&rate=1.286924337070527E-4]:3.1059466697346556,11[&rate=1.286924337070527E-4]:3.1059466697346556)[&rate=1.969833824387509E-4]:3.215951569741338)[&rate=2.0386353059027116E-4]:23.7361839783254)[&rate=2.262206760940307E-4]:16.549743974589703,((6[&rate=3.285330814644574E-4]:3.4579917424609747,8[&rate=2.97573790272706E-4]:3.4579917424609747)[&rate=6.366898969733427E-4]:3.2521889769832852,7[&rate=1.6519928597864654E-4]:6.71018071944426)[&rate=2.184355042080089E-4]:39.897645472946834)[&rate=2.729498408598503E-4]:33.436431449283624)[&rate=6.366898969733427E-4]:12.67812610117275)[&rate=2.0386353059027116E-4]:6.795500141348441,17[&rate=1.4107691854788455E-4]:33.51788388419591)[&rate=1.775157271428428E-4]:0.27032871583521967,((14[&rate=3.120442022488276E-4]:14.200000000000003,18[&rate=3.477535693238044E-4]:0.0)[&rate=1.5915154711426704E-4]:10.000565111568832,16[&rate=1.0041317935713742E-4]:30.30056511156883)[&rate=6.307266379202302E-5]:3.4876474884623008)[&rate=2.184355042080089E-4]:5.9844762015206925,3[&rate=2.6223295280920257E-4]:44.67268880155182)[&rate=1.9032116320079483E-4]:9.06023117526,20[&rate=4.391950177456942E-4]:114.83291997681182)[&rate=1.4107691854788455E-4]:7.380932995824651,19[&rate=1.3495048664996864E-4]:122.21385297263647)[&rate=1.0]:0.0;
tree STATE_2760000 = ((((((1[&rate=2.0906127866365557E-4]:23.910156432957933,16[&rate=1.4676004438324365E-4]:13.910156432957933)[&rate=6.565277942791965E-5]:13.246713516435165,((((4[&rate=5.343269996602529E-4]:11.898729034963685,5[&rate=3.5048512993118917E-4]:11.898729034963685)[&rate=2.6806806125712296E-4]:14.852330392806868,8[&rate=3.5048512993118917E-4]:26.751059427770553)[&rate=1.4152484532178598E-4]:9.035181210223524,(((6[&rate=2.231481322960311E-4]:0.21288594532453214,11[&rate=2.3902999483612833E-4]:0.21288594532453214)[&rate=3.273078679008883E-4]:7.541292093539249,7[&rate=1.3623872173113786E-4]:7.754178038863781)[&rate=4.291145061646073E-4]:14.169178625644129,((9[&rate=1.1962854542216556E-4]:4.005210699546836,12[&rate=1.9023509826617837E-4]:4.005210699546836)[&rate=3.087576639753228E-4]:0.22864474274660473,10[&rate=3.087576639753228E-4]:4.233855442293441)[&rate=5.343269996602529E-4]:17.689501222214467)[&rate=3.5048512993118917E-4]:13.862883973486166)[&rate=1.253472043425468E-4]:34.264932285164726,15[&rate=2.7986306383994417E-4]:4.051172923158802)[&rate=2.7986306383994417E-4]:23.105697026234296)[&rate=3.273078679008883E-4]:5.826245644689948,(((2[&rate=2.7986306383994417E-4]:6.665071336829868,17[&rate=2.3902999483612833E-4]:6.665071336829868)[&rate=1.677979436235755E-4]:13.634928663170129,18[&rate=2.0252623633811286E-4]:0.0)[&rate=2.932414878679686E-4]:10.990738228866363,(3[&rate=1.8440368244766495E-4]:22.499999999999993,13[&rate=3.5048512993118917E-4]:0.0)[&rate=1.4152484532178598E-4]:13.690738228866365)[&rate=1.4676004438324365E-4]:1.6923773652166858)[&rate=2.231481322960311E-4]:0.4588632031003783,14[&rate=3.5048512993118917E-4]:27.34197879718343)[&rate=2.574895903699529E-4]:3.4762019793139416,20[&rate=5.343269996602529E-4]:102.91818077649737)[&rate=3.815568503242907E-4]:10.945302190293177,19[&rate=1.5197721842189198E-4]:113.86348296679054)[&rate=1.0]:0.0;
tree STATE_2775000 = (((((((1[&rate=3.3034292538843576E-4]:33.59746211737044,3[&rate=3.13950902754596E-4]:28.49746211737044)[&rate=2.988553050546665E-4]:0.41860926137741217,((14[&rate=3.9040170684494734E-4]:4.976091935952667,15[&rate=2.5948058805779514E-4]:11.076091935952661)[&rate=1.3733017997373848E-4]:9.223908064047336,18[&rate=8.210904442741476E-5]:0.0)[&rate=6.529601828513126E-4]:3.7160713787478556)[&rate=6.529601828513126E-4]:0.30145370093976,(2[&rate=1.1177572985347115E-4]:18.86005490813129,13[&rate=1.3733017997373848E-4]:1.2600549081312948)[&rate=2.2635439131156752E-4]:5.457470171556324)[&rate=1.972775958423621E-4]:1.9361550340483973,(((4[&rate=1.0266671203316266E-4]:33.853152446793175,((5[&rate=2.162947909978246E-4]:9.94981901506817,12[&rate=0.001066513212582459]:9.94981901506817)[&rate=3.9040170684494734E-4]:6.796173229123854,8[&rate=7.748412907823216E-4]:16.745992244192024)[&rate=1.2897923749602508E-4]:17.10716020260115)[&rate=2.066202218222569E-4]:30.444062152757795,(((6[&rate=3.9040170684494734E-4]:2.773805678113985,7[&rate=1.204959892291009E-4]:2.773805678113985)[&rate=2.162947909978246E-4]:1.600399365120201,11[&rate=3.3034292538843576E-4]:4.374205043234186)[&rate=1.1177572985347115E-4]:45.17915452320713,(9[&rate=2.2635439131156752E-4]:1.6474901519287657,10[&rate=9.292623093656025E-5]:1.6474901519287657)[&rate=2.066202218222569E-4]:47.90586941451255)[&rate=3.3034292538843576E-4]:14.743855033109654)[&rate=1.8821847634746265E-4]:3.4568563532559295,16[&rate=5.222134380397155E-4]:1.7540709528068987)[&rate=4.4494374465140326E-4]:24.49960916092911)[&rate=1.972775958423621E-4]:5.479944619099683,17[&rate=1.707717231983224E-4]:31.733624732835693)[&rate=2.2635439131156752E-4]:6.043365795881726,20[&rate=5.222134380397155E-4]:103.77699052871742)[&rate=1.2897923749602508E-4]:13.350538578109294,19[&rate=1.1177572985347115E-4]:117.12752910682671)[&rate=1.0]:0.0;
tree STATE_2790000 = ((((((1[&rate=2.0793396274106188E-4]:35.920105957839084,2[&rate=2.0793396274106188E-4]:25.920105957839084)[&rate=2.1663697636417162E-4]:1.0383165274848238,(4[&rate=1.5975950412900385E-4]:62.96837389050752,(((5[&rate=1.3769364977132145E-4]:0.7032979202737795,12[&rate=5.569310364546261E-4]:0.7032979202737795)[&rate=2.0793396274106188E-4]:24.88099232810904,((6[&rate=2.260733047189826E-4]:7.470365024545483,7[&rate=6.14875830578613E-5]:7.470365024545483)[&rate=3.1329940701279387E-4]:9.01731459897027,(8[&rate=3.750915147504654E-4]:12.6504362816513,11[&rate=8.449766499965623E-5]:12.6504362816513)[&rate=6.14875830578613E-5]:3.8372433418644523)[&rate=1.1709948846576561E-4]:9.096610624867068)[&rate=1.4843988708120566E-4]:33.126838131568476,(9[&rate=1.273147877786789E-4]:7.485742771394924,10[&rate=1.7834201345003471E-4]:7.485742771394924)[&rate=2.606928686396519E-4]:51.22538560855637)[&rate=2.9256157087457395E-4]:4.257245510556224)[&rate=1.4843988708120566E-4]:29.990048594816386)[&rate=1.430083345188839E-4]:1.0078188517393443,(3[&rate=1.1709948846576561E-4]:28.214481686422793,(16[&rate=1.0154887809743263E-4]:14.601491552627024,17[&rate=2.9256157087457395E-4]:14.601491552627024)[&rate=1.657057492928955E-4]:8.71299013379577)[&rate=3.1329940701279387E-4]:4.651759650640457)[&rate=3.1329940701279387E-4]:10.496556177908914,((13[&rate=1.068133631371384E-4]:5.150928144744228,(15[&rate=2.1663697636417162E-4]:20.299999999999997,18[&rate=2.1663697636417162E-4]:0.0)[&rate=1.9226063353193048E-4]:2.450928144744225)[&rate=1.5975950412900385E-4]:4.235077680463974,14[&rate=1.1198239763171698E-4]:20.8860058252082)[&rate=2.260733047189826E-4]:11.47679168976397)[&rate=5.569310364546261E-4]:6.636406251035297,20[&rate=4.3054332308762585E-4]:111.09920376600746)[&rate=9.613264281754252E-5]:4.251744003840855,19[&rate=1.5975950412900385E-4]:115.35094776984832)[&rate=1.0]:0.0;
tree STATE_2805000 = ((((1[&rate=2.162906103890918E-4]:30.299999999999997,18[&rate=4.0593142027931526E-4]:0.0)[&rate=2.793631046674063E-4]:15.207539536580555,((2[&rate=2.2731697006390554E-4]:25.864855205866775,13[&rate=2.327978666381581E-4]:8.26485520586678)[&rate=2.7301997522678273E-4]:9.015903982973441,(((3[&rate=3.449677310856183E-4]:12.225284649812856,((4[&rate=1.4166318891913426E-4]:34.453773784234684,5[&rate=1.7973914561528515E-4]:34.453773784234684)[&rate=2.327978666381581E-4]:24.7567324355429,(((6[&rate=3.343907277409054E-4]:4.349573192420083,11[&rate=1.639944186836112E-4]:4.349573192420083)[&rate=3.5681646379911455E-4]:3.5370444769033194,(7[&rate=2.2182429759633882E-4]:1.524762701199282,8[&rate=5.506784495743739E-4]:1.524762701199282)[&rate=2.793631046674063E-4]:6.3618549681241205)[&rate=1.639944186836112E-4]:40.03269175893325,((9[&rate=2.4383009792167226E-4]:5.775272151084327,10[&rate=2.928531348777174E-4]:5.775272151084327)[&rate=4.6992085807216625E-4]:14.580736193970079,12[&rate=1.9907994382457723E-4]:20.356008345054406)[&rate=3.2479456501332095E-4]:27.56330108320224)[&rate=2.928531348777174E-4]:11.291196791520939)[&rate=4.3164959812492983E-4]:14.114778430035273)[&rate=3.159749731773088E-4]:11.50638593284883,((14[&rate=2.7301997522678273E-4]:3.2702955793756843,15[&rate=1.9907994382457723E-4]:9.370295579375679)[&rate=2.668885255639787E-4]:0.5267399132032153,16[&rate=2.928531348777174E-4]:9.897035492578894)[&rate=2.2182429759633882E-4]:8.934635090082793)[&rate=1.7973914561528515E-4]:10.90637037023754,17[&rate=1.5422344323566783E-4]:29.738040952899226)[&rate=3.077826040361312E-4]:5.14271823594099)[&rate=1.5422344323566783E-4]:0.6267803477403362)[&rate=2.551241908978865E-4]:6.389631794710965,20[&rate=3.5681646379911455E-4]:107.89717133129152)[&rate=1.5422344323566783E-4]:0.7840429083338023,19[&rate=1.7231285446483508E-4]:108.68121423962532)[&rate=1.0]:0.0;
tree STATE_2820000 = (((((((1[&rate=1.2747357554444822E-4]:26.101476110675392,(((4[&rate=2.9632693373477377E-4]:38.84235219821331,((5[&rate=4.690497818739887E-4]:14.962346368274194,(((9[&rate=4.350582252430218E-4]:0.1913977144236386,11[&rate=1.4384791087370302E-4]:0.1913977144236386)[&rate=1.6595537858647824E-4]:2.393234313735081,10[&rate=2.657546426686305E-4]:2.58463202815872)[&rate=7.457454757190115E-4]:6.729675804342176,12[&rate=4.0802411067730976E-4]:9.314307832500896)[&rate=1.1823569626272415E-4]:5.648038535773297)[&rate=1.8010065582100884E-4]:8.720775708698387,((6[&rate=5.859690759178644E-4]:3.1477863187962907,7[&rate=1.871528410960705E-4]:3.1477863187962907)[&rate=1.7304915763903056E-4]:0.7418308397957758,8[&rate=2.3149953978318974E-4]:3.8896171585920665)[&rate=2.4792320090463786E-4]:19.793504918380513)[&rate=3.079301809809438E-4]:15.159230121240732)[&rate=7.436642842288719E-5]:27.157647801786688,15[&rate=2.657546426686305E-4]:0.0)[&rate=2.0140919711444661E-4]:15.972661072591563,(14[&rate=4.0802411067730976E-4]:0.0,16[&rate=2.3956171832431876E-4]:6.099999999999994)[&rate=2.9632693373477377E-4]:9.872661072591569)[&rate=1.3591948635018243E-4]:0.12881503808382888)[&rate=3.2047788211389425E-4]:4.198523889324605,18[&rate=2.9632693373477377E-4]:0.0)[&rate=3.4930319439409915E-4]:0.2950586220649427,17[&rate=9.464394934985205E-5]:20.59505862206494)[&rate=7.436642842288719E-5]:7.138014805240573,2[&rate=2.3149953978318974E-4]:27.733073427305513)[&rate=2.0868281729663347E-4]:15.070183507522529,(3[&rate=2.4792320090463786E-4]:22.499999999999993,13[&rate=1.871528410960705E-4]:0.0)[&rate=2.4792320090463786E-4]:25.203256934828048)[&rate=2.4792320090463786E-4]:1.2391898343271635,20[&rate=5.1496952765504E-4]:110.0424467691552)[&rate=9.464394934985205E-5]:6.146403107141111,19[&rate=1.6595537858647824E-4]:116.18884987629632)[&rate=1.0]:0.0;
tree STATE_2835000 = ((((((1[&rate=4.600049735112171E-4]:24.521912763965915,((4[&rate=6.087512158376608E-4]:1.9463610712878041,5[&rate=2.6239809501960563E-4]:1.9463610712878041)[&rate=2.0062619629568446E-4]:52.76113297304171,((((6[&rate=2.2288404157635468E-4]:0.031110008190494032,11[&rate=1.5395168896292715E-4]:0.031110008190494032)[&rate=3.2051728682283874E-4]:2.249417009739479,7[&rate=2.540813705745878E-4]:2.280527017929973)[&rate=7.637682333963993E-4]:14.008350445202701,((8[&rate=3.5889590430232375E-4]:0.3197315725529567,9[&rate=1.6238647547546457E-4]:0.3197315725529567)[&rate=2.6239809501960563E-4]:1.789403728269765,10[&rate=2.540813705745878E-4]:2.1091353008227216)[&rate=6.087512158376608E-4]:14.179742162309953)[&rate=7.637682333963993E-4]:4.271552745988021,12[&rate=2.540813705745878E-4]:20.560430209120696)[&rate=8.72914906689239E-5]:34.14706383520882)[&rate=2.0062619629568446E-4]:25.8144187196364)[&rate=3.450369637971937E-4]:0.8826664072006309,((3[&rate=2.1541583911707397E-4]:12.0658550288748,16[&rate=2.540813705745878E-4]:7.165855028874802)[&rate=1.932270296058192E-4]:6.609860492873324,15[&rate=1.8576547355241205E-4]:13.775715521748126)[&rate=1.7818696946716726E-4]:1.6288636494184203)[&rate=2.0800896038906464E-4]:8.077623069772812,(17[&rate=1.932270296058192E-4]:22.610553027769953,18[&rate=4.105666276919457E-4]:2.3105530277699557)[&rate=2.0062619629568446E-4]:0.8716492131694054)[&rate=2.9912625034620366E-4]:15.189985853904034,(2[&rate=7.637682333963993E-4]:37.771910717294574,(13[&rate=1.0952005660802112E-4]:2.3467535907506942,14[&rate=3.741601746643265E-4]:13.846753590750694)[&rate=2.0062619629568446E-4]:17.825157126543886)[&rate=2.1541583911707397E-4]:0.900277377548818)[&rate=1.236712611688345E-4]:5.656156177053731,20[&rate=4.330609691121812E-4]:110.32834427189712)[&rate=3.0949658990724597E-4]:1.4591149244321429,19[&rate=1.5395168896292715E-4]:111.78745919632927)[&rate=1.0]:0.0;
tree STATE_2850000 = ((((((1[&rate=1.811045968578813E-4]:25.476838425532875,15[&rate=2.0400816563211947E-4]:15.476838425532875)[&rate=2.659868849849618E-4]:8.286614763004977,14[&rate=3.7850324472590206E-4]:17.663453188537858)[&rate=7.366995315471144E-4]:5.160383524228521,(((4[&rate=1.1055134175817407E-4]:20.291246620986964,11[&rate=2.528024277101475E-4]:20.291246620986964)[&rate=1.1055134175817407E-4]:9.449867162197563,((5[&rate=2.277438294620211E-4]:5.342331802252828,12[&rate=8.219695924747424E-4]:5.342331802252828)[&rate=1.6980032989594417E-4]:6.458940003658996,8[&rate=3.990002343736644E-4]:11.801271805911824)[&rate=4.720906087029116E-4]:17.939841977272703)[&rate=6.710080654944464E-4]:13.826919848140097,((6[&rate=9.416931107240657E-4]:2.387053960137524,7[&rate=9.416931107240657E-4]:2.387053960137524)[&rate=3.248809770079668E-4]:28.897024586024937,(9[&rate=0.001136510480521992]:1.0602826602214368,10[&rate=5.733467573806338E-4]:1.0602826602214368)[&rate=2.4007678295679297E-4]:30.223795885941026)[&rate=4.4542256948853977E-4]:12.283955085162162)[&rate=1.9248389961022723E-4]:51.35580308144175)[&rate=2.7970194552287976E-4]:3.7591684435827943,(((2[&rate=2.659868849849618E-4]:20.963664974062922,(17[&rate=0.001614453928464767]:20.299999999999997,18[&rate=9.416931107240657E-4]:0.0)[&rate=3.5945003438293626E-4]:0.6636649740629252)[&rate=8.219695924747424E-4]:4.191407147390819,(3[&rate=3.090525016317721E-4]:22.499999999999993,13[&rate=3.5945003438293626E-4]:0.0)[&rate=1.2334722290601976E-4]:7.5550721214537475)[&rate=2.940271987856979E-4]:6.716810180889695,16[&rate=5.628518704086719E-5]:31.871882302343437)[&rate=5.017533674410861E-4]:0.8111228540057311)[&rate=1.4707473860638132E-4]:4.54847810805019,20[&rate=5.017533674410861E-4]:103.23148326439936)[&rate=1.6980032989594417E-4]:2.312917621995112,19[&rate=1.5849019840566674E-4]:105.54440088639447)[&rate=1.0]:0.0;
tree STATE_2865000 = (((((1[&rate=5.91202144137943E-4]:5.100000000000001,3[&rate=6.40384124124038E-4]:0.0)[&rate=1.9115143255858842E-4]:22.499999999999993,13[&rate=2.8807892465064E-4]:0.0)[&rate=1.2424157616298083E-4]:15.5167847685303,(((2[&rate=1.802002482319248E-4]:10.483306800023641,17[&rate=1.4731347169762052E-4]:10.483306800023641)[&rate=3.871462068070221E-4]:7.412586213957013,((((4[&rate=2.134708765195691E-4]:6.971031356404968,5[&rate=1.802002482319248E-4]:6.971031356404968)[&rate=3.331257133287628E-4]:38.02779245062786,((((6[&rate=1.802002482319248E-4]:0.37017711349300225,8[&rate=3.331257133287628E-4]:0.37017711349300225)[&rate=3.6787545847368413E-4]:8.226536094160403,7[&rate=2.614389608588576E-4]:8.596713207653405)[&rate=2.022211266736748E-4]:8.898280311377587,12[&rate=2.2495904337104758E-4]:17.49499351903099)[&rate=0.0010665931371351058]:6.640158546885736,((9[&rate=1.5837002247491274E-4]:2.3635848631000105,11[&rate=8.165441656784756E-5]:2.3635848631000105)[&rate=2.134708765195691E-4]:1.0946517903445923,10[&rate=2.3674327363228435E-4]:3.4582366534446027)[&rate=6.40384124124038E-4]:20.676915412472127)[&rate=2.7447970575376977E-4]:20.8636717411161)[&rate=3.172986508742688E-4]:21.001176192967172,15[&rate=7.009894997934474E-4]:0.0)[&rate=5.812757870516155E-5]:13.096656462982835,(14[&rate=4.556180362464378E-4]:0.0,16[&rate=0.0010665931371351058]:6.099999999999994)[&rate=9.795873795343801E-5]:6.996656462982841)[&rate=1.3599968682416664E-4]:4.7992365509978185)[&rate=1.802002482319248E-4]:2.404106986019343,18[&rate=1.4731347169762052E-4]:0.0)[&rate=2.7447970575376977E-4]:12.816784768530297)[&rate=2.7447970575376977E-4]:1.128156953258241,20[&rate=4.8330699420539387E-4]:100.24494172178854)[&rate=3.499323113701224E-4]:4.692881374031913,19[&rate=1.802002482319248E-4]:104.93782309582045)[&rate=1.0]:0.0;
tree STATE_2880000 = ((((((((1[&rate=2.8404682321508246E-4]:10.0,16[&rate=3.0536074809297436E-4]:0.0)[&rate=2.630775293156883E-4]:10.654887818996116,2[&rate=2.9664030163593604E-4]:10.654887818996116)[&rate=3.62410704616531E-4]:8.744683689857183,(((4[&rate=2.5869227852302017E-4]:50.916924956036965,(((5[&rate=2.7575460519493607E-4]:5.686795011083207,12[&rate=2.336897134773266E-4]:5.686795011083207)[&rate=3.0536074809297436E-4]:5.815234399424098,(9[&rate=2.5417502050051127E-4]:5.574499370865394,10[&rate=1.8130606469617447E-4]:5.574499370865394)[&rate=3.9358630732299244E-4]:5.927530039641911)[&rate=3.7116203849856623E-4]:22.639818211935093,(((6[&rate=3.098816784867018E-4]:4.704236570533978,11[&rate=3.0536074809297436E-4]:4.704236570533978)[&rate=3.546631677068376E-4]:0.19831080065647821,8[&rate=3.193753766993123E-4]:4.902547371190456)[&rate=3.297003383603617E-4]:3.2199969044409382,7[&rate=2.1188083802176685E-4]:8.122544275631395)[&rate=2.9664030163593604E-4]:26.019303346811004)[&rate=3.0536074809297436E-4]:16.775077333594567)[&rate=2.8820543720744303E-4]:15.748929723474006,15[&rate=4.322343381763001E-4]:0.6658546795109714)[&rate=3.0095459430197865E-4]:6.5186765575890036,(14[&rate=2.8820543720744303E-4]:0.0,17[&rate=2.630775293156883E-4]:6.099999999999994)[&rate=3.9358630732299244E-4]:1.0845312370999807)[&rate=2.1188083802176685E-4]:12.215040271753324)[&rate=2.2746446894954727E-4]:0.8097749396752363,3[&rate=3.4124812996805064E-4]:25.109346448528534)[&rate=2.336897134773266E-4]:0.09065355147146192,18[&rate=2.8404682321508246E-4]:0.0)[&rate=3.0095459430197865E-4]:7.145955969173983,13[&rate=2.5417502050051127E-4]:9.845955969173986)[&rate=2.923970544529773E-4]:4.12888704231176,20[&rate=4.322343381763001E-4]:97.57484301148574)[&rate=3.0536074809297436E-4]:1.4179914757312417,19[&rate=2.2037542672746183E-4]:98.99283448721698)[&rate=1.0]:0.0;
tree STATE_2895000 = ((((((1[&rate=1.0879211277747637E-4]:15.433310481809059,((4[&rate=1.9301452092107096E-4]:57.20772025091048,(5[&rate=3.4207253254765E-4]:32.13925274094257,(((6[&rate=2.2197871874156212E-4]:7.763441638242901,7[&rate=4.1003248612124456E-4]:7.763441638242901)[&rate=3.93404714470471E-4]:6.74416320512495,11[&rate=1.5810826639964628E-4]:14.50760484336785)[&rate=2.3592958887883695E-4]:16.171257377446945,(8[&rate=2.0052502230822754E-4]:23.036991873547795,((9[&rate=2.6436766459632936E-4]:5.209086143437663,10[&rate=2.0781166742224786E-4]:5.209086143437663)[&rate=2.0781166742224786E-4]:10.101635183055564,12[&rate=2.9533407207746624E-4]:15.310721326493226)[&rate=5.746511338467074E-4]:7.726270547054568)[&rate=4.1003248612124456E-4]:7.641870347267002)[&rate=3.6539248942804765E-4]:1.4603905201277705)[&rate=2.571082366402054E-4]:25.06846750996791)[&rate=3.3164155208464897E-4]:8.792279749089523,15[&rate=1.3213725340332184E-4]:0.0)[&rate=4.80258396481783E-4]:5.433310481809059)[&rate=1.6799494697435357E-4]:11.280776065381119,(2[&rate=2.4997045088200607E-4]:12.564262782348706,17[&rate=3.7867006130981563E-4]:12.564262782348706)[&rate=2.429217314430478E-4]:4.1498237648414715)[&rate=1.3213725340332184E-4]:5.00100210914168,((14[&rate=1.5810826639964628E-4]:0.0,16[&rate=1.3213725340332184E-4]:6.099999999999994)[&rate=2.2197871874156212E-4]:14.200000000000003,18[&rate=1.4663942065279092E-4]:0.0)[&rate=2.7178241321984786E-4]:1.4150886563318608)[&rate=3.7867006130981563E-4]:2.887728566804938,(3[&rate=2.0052502230822754E-4]:22.499999999999993,13[&rate=3.3164155208464897E-4]:0.0)[&rate=4.1003248612124456E-4]:7.002817223136802)[&rate=3.2184527109316676E-4]:2.0272893225947257,20[&rate=5.746511338467074E-4]:92.63010654573152)[&rate=1.3213725340332184E-4]:12.465728328320964,19[&rate=1.769130097903066E-4]:105.09583487405249)[&rate=1.0]:0.0;
tree STATE_2910000 = ((((((1[&rate=2.9845242106768034E-4]:32.797154546235106,(((((4[&rate=9.74235396668947E-5]:32.7623995839333,(5[&rate=3.1786917215910254E-4]:10.275437627748254,12[&rate=2.807756438549379E-4]:10.275437627748254)[&rate=4.917818852574977E-4]:22.48696195618505)[&rate=2.807756438549379E-4]:26.539014143648394,((((6[&rate=2.643579878346602E-4]:2.0463094496789096,11[&rate=1.4644736980909168E-4]:2.0463094496789096)[&rate=4.139198690033242E-4]:4.141936240823348,8[&rate=2.807756438549379E-4]:6.188245690502257)[&rate=2.9845242106768034E-4]:1.2444511616904412,7[&rate=2.48834397236865E-4]:7.432696852192699)[&rate=3.518501616431214E-4]:27.622235214040934,(9[&rate=1.9729526805997529E-4]:4.015749246567874,10[&rate=1.3490394453997368E-4]:4.015749246567874)[&rate=4.3507119259283776E-4]:31.039182819665758)[&rate=2.2657171542155371E-4]:24.246481661348064)[&rate=2.56504312934373E-4]:6.698586272418304,16[&rate=9.74235396668947E-5]:0.0)[&rate=4.3507119259283776E-4]:12.566255927882167,14[&rate=2.3390256485296223E-4]:6.466255927882173)[&rate=5.338625483584476E-4]:3.7094773082246633,17[&rate=7.392480694292618E-4]:16.27573323610683)[&rate=3.3971111959927143E-4]:6.521421310128275)[&rate=2.3390256485296223E-4]:2.1749025631846592,15[&rate=1.3490394453997368E-4]:24.972057109419765)[&rate=2.0468986934491304E-4]:0.7881277842903529,18[&rate=2.1928455551362402E-4]:5.460184893710121)[&rate=2.4131204350118156E-4]:9.639302487247747,((2[&rate=3.9565269544789645E-4]:23.958905426822568,13[&rate=3.518501616431214E-4]:6.358905426822574)[&rate=2.9845242106768034E-4]:1.674940032455666,3[&rate=4.917818852574977E-4]:30.533845459278233)[&rate=4.6031199405008365E-4]:9.76564192167963)[&rate=2.120041395779836E-4]:3.315120701068267,20[&rate=4.917818852574977E-4]:104.71460808202613)[&rate=3.0790668610663135E-4]:0.42020336449566287,19[&rate=1.655365026273235E-4]:105.1348114465218)[&rate=1.0]:0.0;
tree STATE_2925000 = ((((((((1[&rate=4.842978780542351E-4]:13.39752450705248,17[&rate=2.959022662646483E-4]:3.3975245070524807)[&rate=4.842978780542351E-4]:2.2007536313136455,15[&rate=2.490130468323571E-4]:5.598278138366126)[&rate=2.490130468323571E-4]:7.979421812305375,3[&rate=1.8584045674144113E-4]:18.4776999506715)[&rate=2.490130468323571E-4]:2.3480433524035504,14[&rate=2.6240325635345303E-4]:9.825743303075058)[&rate=2.697658359616946E-4]:6.274953832486759,(((2[&rate=2.4284128675468555E-4]:20.299999999999997,18[&rate=2.959022662646483E-4]:0.0)[&rate=1.6047373936369083E-4]:1.456548486737617,((4[&rate=1.2672239771440656E-4]:35.48875720232164,(5[&rate=2.0531073109750675E-4]:13.629143504871575,12[&rate=1.6047373936369083E-4]:13.629143504871575)[&rate=2.4284128675468555E-4]:21.85961369745007)[&rate=3.189014880868301E-4]:15.24260678595099,((((6[&rate=3.189014880868301E-4]:2.2409297064611824,7[&rate=2.3694513211626537E-4]:2.2409297064611824)[&rate=1.351936965726318E-4]:3.8260107534477097,11[&rate=1.9553735605777262E-4]:6.066940459908892)[&rate=2.959022662646483E-4]:24.72457266663156,8[&rate=2.490130468323571E-4]:30.79151312654045)[&rate=3.3339564565317757E-4]:6.548996371544746,(9[&rate=2.490130468323571E-4]:5.5285773816142445,10[&rate=1.7602133711409318E-4]:5.5285773816142445)[&rate=3.3339564565317757E-4]:31.811932116470953)[&rate=2.555124109479757E-4]:13.390854490187436)[&rate=1.4890034988093115E-4]:37.02518449846498)[&rate=2.2050903979277755E-4]:0.0685460346357587,13[&rate=1.4890034988093115E-4]:4.225094521373379)[&rate=1.1587513222070828E-4]:0.37560261418843766)[&rate=2.777035022706249E-4]:5.26111623411299,16[&rate=1.6047373936369083E-4]:27.4618133696748)[&rate=2.3694513211626537E-4]:12.334465745778317,20[&rate=4.842978780542351E-4]:105.79627911545312)[&rate=3.512334107098543E-4]:4.302455790722021,19[&rate=1.5486544056668374E-4]:110.09873490617514)[&rate=1.0]:0.0;
tree STATE_2940000 = (((((1[&rate=3.1186816672951434E-4]:22.439862584610097,((2[&rate=2.2569291563777485E-4]:7.936860692090178,(3[&rate=2.70494775536926E-4]:10.999999999999993,14[&rate=2.1950288389103645E-4]:0.0)[&rate=3.4094497696167853E-4]:1.836860692090184)[&rate=2.1950288389103645E-4]:2.043172650051062,17[&rate=4.264293286061233E-4]:9.98003334214124)[&rate=3.330396509130725E-4]:2.4598292424688566)[&rate=3.185748287750431E-4]:7.8601374153899,18[&rate=3.6875011189795227E-4]:0.0)[&rate=2.816565908521735E-4]:8.912712349743714,(((((4[&rate=1.7968018853768691E-4]:34.222510771719534,(5[&rate=4.859812046848243E-4]:25.291908086837015,12[&rate=3.4943109317907745E-4]:25.291908086837015)[&rate=1.4455936515820667E-4]:8.930602684882519)[&rate=2.316385535710232E-4]:33.66348747393341,(((6[&rate=3.586364807597686E-4]:5.9260141166415705,7[&rate=3.586364807597686E-4]:5.9260141166415705)[&rate=3.6875011189795227E-4]:1.679751504954134,11[&rate=3.05436723767411E-4]:7.605765621595705)[&rate=2.485846998093292E-4]:44.68856100442484,((8[&rate=5.599202300602235E-4]:1.2240082769560179,9[&rate=3.929089415512499E-4]:1.2240082769560179)[&rate=3.2561019668075826E-4]:0.43614183619988234,10[&rate=2.9322709339536085E-4]:1.6601501131559002)[&rate=3.4094497696167853E-4]:50.63417651286465)[&rate=3.330396509130725E-4]:15.591671619632393)[&rate=2.129818194879098E-4]:7.348981316640078,15[&rate=2.8737730848707503E-4]:9.23497956229302)[&rate=2.8737730848707503E-4]:13.148599358043569,16[&rate=4.5047655868730264E-4]:22.38357892033659)[&rate=1.8981272526755706E-4]:3.8902918498936714,13[&rate=1.66553175753446E-4]:8.673870770230266)[&rate=1.66553175753446E-4]:2.9388415795134506)[&rate=2.2569291563777485E-4]:6.523607683503798,20[&rate=4.264293286061233E-4]:101.73632003324751)[&rate=3.4943109317907745E-4]:0.6156828171810957,19[&rate=2.6500321244402736E-4]:102.3520028504286)[&rate=1.0]:0.0;
tree STATE_2955000 = (((((((1[&rate=3.959854715992127E-4]:16.099999999999994,14[&rate=1.5032111053765756E-4]:0.0)[&rate=2.2623377231023115E-4]:10.024407752457023,(((4[&rate=2.2623377231023115E-4]:18.662814721168488,(5[&rate=1.2109596657048585E-4]:3.966979673026276,12[&rate=5.732805372325476E-4]:3.966979673026276)[&rate=6.277247265899018E-4]:14.69583504814221)[&rate=2.4347263070604658E-4]:36.68510523503409,((6[&rate=2.1762456753373683E-4]:10.259420183385615,((7[&rate=2.1762456753373683E-4]:6.666038093498377,8[&rate=8.99450672924264E-4]:6.666038093498377)[&rate=3.66966041738978E-4]:1.5158594135410794,11[&rate=2.0895360452830058E-4]:8.181897507039457)[&rate=2.0015830862601445E-4]:2.077522676346158)[&rate=3.959854715992127E-4]:23.14414400898263,(9[&rate=1.9116109448798118E-4]:1.637300113015343,10[&rate=4.5080390043403744E-4]:1.637300113015343)[&rate=3.191221978028033E-4]:31.7662640793529)[&rate=2.2623377231023115E-4]:21.94435576383433)[&rate=2.7925385867674687E-4]:10.652080043797426,15[&rate=3.4170805683318554E-4]:0.0)[&rate=4.1241770966793655E-4]:16.124407752457017)[&rate=1.7211596137889018E-4]:4.17559224754298,18[&rate=2.0895360452830058E-4]:0.0)[&rate=1.3728337176483594E-4]:3.43263930141876,(2[&rate=3.959854715992127E-4]:16.725874103689364,3[&rate=3.959854715992127E-4]:21.625874103689362)[&rate=1.2109596657048585E-4]:7.006765197729393)[&rate=3.0859436433491004E-4]:3.615072487603399,(13[&rate=1.2109596657048585E-4]:0.0,(16[&rate=1.9116109448798118E-4]:1.298280085100572,17[&rate=7.116353207046019E-4]:1.298280085100572)[&rate=5.006866668031806E-4]:16.301719914899422)[&rate=2.1762456753373683E-4]:9.747711789022162)[&rate=1.9116109448798118E-4]:0.8344085212323051,20[&rate=6.277247265899018E-4]:94.18212031025446)[&rate=4.5080390043403744E-4]:1.4250456558099671,19[&rate=2.3483417320591856E-4]:95.60716596606443)[&rate=1.0]:0.0;
tree STATE_2970000 = (((((1[&rate=3.941241601263085E-4]:23.040689620793145,((3[&rate=5.692057430205995E-4]:10.999999999999993,14[&rate=2.8547024119192474E-4]:0.0)[&rate=2.3415871960916456E-4]:4.246741680885478,17[&rate=1.8021548644984612E-4]:10.346741680885472)[&rate=4.396190590359549E-4]:2.693947939907673)[&rate=2.522354857562413E-4]:8.118266653002209,13[&rate=2.464213645678046E-4]:3.55895627379536)[&rate=2.1273839251130836E-4]:0.369530079170417,((2[&rate=4.215739773224068E-4]:9.86135278354827,(((4[&rate=2.3415871960916456E-4]:61.676303254778226,((5[&rate=2.4041775908103974E-4]:30.547381326847,(6[&rate=3.941241601263085E-4]:4.402712714256342,7[&rate=2.8547024119192474E-4]:4.402712714256342)[&rate=3.7303804262619675E-4]:26.144668612590657)[&rate=2.8547024119192474E-4]:2.1178849416220125,((8[&rate=2.1273839251130836E-4]:17.859013116119325,11[&rate=1.8021548644984612E-4]:17.859013116119325)[&rate=2.7996998129071386E-4]:4.632837761944781,((9[&rate=2.7449052145254934E-4]:2.0945951848440822,10[&rate=2.690062860328032E-4]:2.0945951848440822)[&rate=5.692057430205995E-4]:7.982134952003906,12[&rate=1.8021548644984612E-4]:10.076730136847988)[&rate=4.215739773224068E-4]:12.415120741216118)[&rate=2.966321599197341E-4]:10.173415390404905)[&rate=2.579112421615105E-4]:29.011036986309215)[&rate=2.1273839251130836E-4]:4.323696745221774,16[&rate=3.267324852806303E-4]:0.0)[&rate=3.02344055629152E-4]:0.9999381251550972,15[&rate=3.0817877276379104E-4]:0.9999381251550972)[&rate=4.976540697301662E-4]:8.861414658393173)[&rate=3.639496535434944E-4]:10.438647216451727,18[&rate=2.0400610122963883E-4]:0.0)[&rate=3.267324852806303E-4]:1.2284863529657741)[&rate=3.941241601263085E-4]:0.7608126398033903,20[&rate=5.692057430205995E-4]:88.28929899276916)[&rate=3.141657424105073E-4]:2.0684527417394634,19[&rate=1.9366181811922948E-4]:90.35775173450862)[&rate=1.0]:0.0;
tree STATE_2985000 = ((((((1[&rate=2.2894956940937845E-4]:26.54919526334416,(16[&rate=3.909494679999378E-4]:9.28401008296892,17[&rate=4.0505735036345137E-4]:9.28401008296892)[&rate=4.984338333545535E-4]:7.265185180375241)[&rate=2.921234380499787E-4]:14.879860530449548,(((3[&rate=3.212791480828966E-4]:0.944184428655177,((4[&rate=4.2026756290084924E-4]:21.03571776033353,5[&rate=2.828585579718934E-4]:21.03571776033353)[&rate=2.1978337284300946E-4]:7.155918116041054,(((6[&rate=4.984338333545535E-4]:7.307034217500715,(7[&rate=4.984338333545535E-4]:5.760727399008105,8[&rate=2.828585579718934E-4]:5.760727399008105)[&rate=3.112868244404913E-4]:1.54630681849261)[&rate=2.828585579718934E-4]:4.310735605455068,11[&rate=1.6743328293924162E-4]:11.617769822955783)[&rate=5.572462986327721E-4]:9.999847520262431,((9[&rate=5.252091677620963E-4]:2.337849352862109,10[&rate=1.091403357440899E-4]:2.337849352862109)[&rate=9.163428450520117E-4]:6.404394823535034,12[&rate=4.550388160486918E-4]:8.742244176397143)[&rate=3.65337495980976E-4]:12.87537316682107)[&rate=7.335169632325741E-4]:6.574018533156369)[&rate=1.6743328293924162E-4]:33.852548552280595)[&rate=2.0064842928616092E-4]:14.115105365806862,(14[&rate=2.828585579718934E-4]:0.0,15[&rate=2.921234380499787E-4]:6.099999999999994)[&rate=3.909494679999378E-4]:4.059289794462046)[&rate=1.091403357440899E-4]:15.085804880305375,18[&rate=1.091403357440899E-4]:4.945094674767418)[&rate=2.6474588360233896E-4]:6.183961119026293)[&rate=2.6474588360233896E-4]:2.2465035923116403,13[&rate=2.828585579718934E-4]:16.075559386105354)[&rate=6.510867138169317E-4]:5.266517589487549,2[&rate=3.212791480828966E-4]:38.9420769755929)[&rate=1.536046791361671E-4]:6.6211396104542075,20[&rate=4.2026756290084924E-4]:111.5632165860471)[&rate=7.335169632325741E-4]:3.318025645907042,19[&rate=1.091403357440899E-4]:114.88124223195415)[&rate=1.0]:0.0;
tree STATE_3000000 = ((((((((1[&rate=5.059893274689156E-4]:11.277411293467807,16[&rate=1.8665643379559246E-4]:1.2774112934678072)[&rate=2.2306097706063484E-4]:1.1467535276481016,15[&rate=2.6690272411879527E-4]:2.424164821115909)[&rate=3.4607972598269015E-4]:1.3621988028830572,17[&rate=1.068730258755968E-4]:3.786363623998966)[&rate=3.4607972598269015E-4]:2.931528189360492,(((4[&rate=2.1151922279714756E-4]:31.545758240230985,5[&rate=5.563044755397866E-4]:31.545758240230985)[&rate=2.2306097706063484E-4]:19.525335600792385,((6[&rate=3.2228455307979165E-4]:10.862249995282244,((7[&rate=2.6690272411879527E-4]:2.0524750345234195,8[&rate=2.45241970770089E-4]:2.0524750345234195)[&rate=4.299424658515014E-4]:1.9038926008345354,12[&rate=5.297069804122679E-4]:3.956367635357955)[&rate=3.850318566971048E-4]:6.90588235992429)[&rate=2.886195938132066E-4]:25.209439993189516,((9[&rate=3.2228455307979165E-4]:1.2421496730550505,11[&rate=4.649252654381972E-4]:1.2421496730550505)[&rate=5.059893274689156E-4]:1.1240162406530005,10[&rate=4.845422104860458E-4]:2.366165913708051)[&rate=2.3426125092882564E-4]:33.70552407476371)[&rate=4.468095501946723E-4]:14.999403852551609)[&rate=1.5677050751510053E-4]:21.028906158976625,14[&rate=1.5677050751510053E-4]:0.0)[&rate=4.299424658515014E-4]:0.6178918133594635)[&rate=2.6690272411879527E-4]:15.870808175377448,2[&rate=3.991987052054601E-4]:22.588699988736906)[&rate=5.297069804122679E-4]:1.0620924128072886,((3[&rate=0.0011610957848386622]:22.499999999999993,13[&rate=3.850318566971048E-4]:0.0)[&rate=3.991987052054601E-4]:2.700000000000003,18[&rate=4.468095501946723E-4]:0.0)[&rate=7.915380375046379E-4]:3.350792401544197)[&rate=5.297069804122679E-4]:3.0990423519573937,20[&rate=4.468095501946723E-4]:92.74983475350159)[&rate=3.991987052054601E-4]:0.44479723656232295,19[&rate=1.9946768390571452E-4]:93.19463199006391)[&rate=1.0]:0.0;
tree STATE_3015000 = ((((1[&rate=3.0793301911989326E-4]:36.052908736581145,13[&rate=2.869478027168264E-4]:8.45290873658115)[&rate=2.768561346705653E-4]:0.5785174520123064,((2[&rate=1.8905497839653805E-4]:18.46725439064123,(3[&rate=5.879994302815802E-4]:19.688241859347535,((((4[&rate=2.2849790226863562E-4]:51.80371201848748,(((5[&rate=4.694862688690444E-4]:12.478807726623106,12[&rate=2.188994812844234E-4]:12.478807726623106)[&rate=3.0793301911989326E-4]:8.796052663131832,(6[&rate=2.6696691470685506E-4]:12.799130345963663,7[&rate=1.230788416771251E-4]:12.799130345963663)[&rate=5.50568473531378E-4]:8.475730043791275)[&rate=3.4225718370281094E-4]:9.467868759407185,((8[&rate=2.188994812844234E-4]:7.632506969980501,(9[&rate=2.869478027168264E-4]:2.4026936197269486,10[&rate=2.188994812844234E-4]:2.4026936197269486)[&rate=3.6787310118712997E-4]:5.229813350253552)[&rate=1.992739694825731E-4]:7.303811200958762,11[&rate=4.928388142343873E-4]:14.936318170939263)[&rate=5.194782367570237E-4]:15.80641097822286)[&rate=1.8905497839653805E-4]:21.060982869325358)[&rate=5.50568473531378E-4]:20.296287981512513,14[&rate=6.351466448819053E-4]:0.0)[&rate=3.189328221710868E-4]:2.648432070281956,17[&rate=3.0793301911989326E-4]:8.74843207028195)[&rate=3.5473278186315817E-4]:2.790487815987845,(15[&rate=1.783791690752769E-4]:8.665809230724207,16[&rate=2.869478027168264E-4]:8.665809230724207)[&rate=2.869478027168264E-4]:2.873110655545588)[&rate=1.6702388092542904E-4]:3.249321973077741)[&rate=3.0793301911989326E-4]:3.6790125312936937)[&rate=2.3804897608184752E-4]:4.411523903646511,18[&rate=3.0793301911989326E-4]:2.578778294287744)[&rate=3.5473278186315817E-4]:3.75264789430571)[&rate=2.0918598336038848E-4]:3.208300406674695,20[&rate=5.50568473531378E-4]:95.83972659526815)[&rate=5.879994302815802E-4]:0.9999592113297524,19[&rate=1.8905497839653805E-4]:96.8396858065979)[&rate=1.0]:0.0;
tree STATE_3030000 = (((((((((1[&rate=2.201792939661687E-4]:10.0,15[&rate=3.1647727364352517E-4]:0.0)[&rate=4.815259068125985E-4]:5.328140970698939,((4[&rate=1.902051021941334E-4]:60.1096206651575,(((5[&rate=2.6418789342442443E-4]:8.986763006489392,12[&rate=3.837603061595186E-4]:8.986763006489392)[&rate=1.805187044326896E-4]:15.858149441884335,(9[&rate=1.5158720895058894E-4]:8.753954863660512,10[&rate=1.417361063651278E-4]:8.753954863660512)[&rate=4.815259068125985E-4]:16.090957584713216)[&rate=4.5259545824522646E-4]:7.252116881986062,(((6[&rate=1.902051021941334E-4]:3.7615168663034004,8[&rate=1.7089642493013196E-4]:3.7615168663034004)[&rate=3.47611110520291E-4]:2.246605386640184,7[&rate=1.210032392597026E-4]:6.0081222529435845)[&rate=9.704151738503761E-5]:8.329570068679539,11[&rate=1.7089642493013196E-4]:14.337692321623123)[&rate=4.271193401556831E-4]:17.759337008736665)[&rate=1.0965808946577406E-4]:28.012591334797712)[&rate=1.805187044326896E-4]:5.8903793348425,16[&rate=1.0965808946577406E-4]:0.0)[&rate=1.3160082540760172E-4]:5.328140970698939)[&rate=0.0012211552039128768]:0.771859029301055,14[&rate=6.65643260854964E-4]:0.0)[&rate=1.7089642493013196E-4]:14.200000000000003,18[&rate=9.704151738503761E-5]:0.0)[&rate=8.195020976475837E-5]:0.24063230500142652,17[&rate=3.1647727364352517E-4]:20.540632305001424)[&rate=2.6418789342442443E-4]:2.0158616608722326,(2[&rate=2.6418789342442443E-4]:17.599999999999994,13[&rate=2.414273129942496E-4]:0.0)[&rate=8.195020976475837E-5]:4.956493965873662)[&rate=1.805187044326896E-4]:3.6391671532585406,3[&rate=4.815259068125985E-4]:31.095661119132195)[&rate=8.907014205412431E-4]:7.7248928634117675,20[&rate=4.271193401556831E-4]:99.92055398254396)[&rate=2.6418789342442443E-4]:11.356946718968217,19[&rate=1.0965808946577406E-4]:111.27750070151218)[&rate=1.0]:0.0;
tree STATE_3045000 = ((((((1[&rate=2.56630840197192E-4]:31.61760965370928,(2[&rate=1.056793280256283E-4]:18.835950523180884,16[&rate=4.4871412707326214E-4]:18.835950523180884)[&rate=8.447500754736185E-4]:2.7816591305283964)[&rate=6.417524567799885E-4]:8.2406194509513,13[&rate=5.3415316533080165E-5]:12.258229104660586)[&rate=6.417524567799885E-4]:1.2316100546591713,(((((((4[&rate=2.1702445013650507E-4]:4.6878932829136994,5[&rate=1.829088082366933E-4]:4.6878932829136994)[&rate=6.417524567799885E-4]:5.954489379866204,12[&rate=3.653717356075749E-4]:10.642382662779903)[&rate=2.56630840197192E-4]:37.352438998661135,(((6[&rate=3.4319993965465734E-4]:4.739270022827854,8[&rate=5.78039307584634E-4]:4.739270022827854)[&rate=4.8471162376622555E-4]:3.449587889650773,7[&rate=1.6228198360963527E-4]:8.188857912478626)[&rate=3.4319993965465734E-4]:27.05124916536124,((9[&rate=4.8471162376622555E-4]:1.6574723019761333,10[&rate=3.044969103390174E-4]:1.6574723019761333)[&rate=4.8471162376622555E-4]:18.527713482137273,11[&rate=3.4319993965465734E-4]:20.185185784113408)[&rate=1.4282738888858802E-4]:15.054921293726458)[&rate=5.270204497170752E-4]:12.75471458360117)[&rate=2.4267468911525928E-4]:18.51758068054889,17[&rate=2.4267468911525928E-4]:0.512402341989926)[&rate=4.4871412707326214E-4]:6.673175370785373,15[&rate=2.1702445013650507E-4]:7.185577712775299)[&rate=1.4282738888858802E-4]:7.387596498648094,14[&rate=2.714898347268565E-4]:8.473174211423398)[&rate=1.524342513502028E-4]:7.020608836017644,18[&rate=1.4282738888858802E-4]:1.293783047441039)[&rate=1.2412171496613362E-4]:9.496056111878715)[&rate=5.270204497170752E-4]:10.765459657196502,3[&rate=5.78039307584634E-4]:46.75529881651625)[&rate=1.056793280256283E-4]:6.316487806221346,20[&rate=4.4871412707326214E-4]:114.1717866227376)[&rate=2.1702445013650507E-4]:5.671454282016768,19[&rate=1.524342513502028E-4]:119.84324090475437)[&rate=1.0]:0.0;
tree STATE_3060000 = (((((((((1[&rate=1.4868368163964546E-4]:13.163312865360382,(3[&rate=5.306196527740606E-4]:6.604110207436939,16[&rate=4.172394987102653E-4]:1.7041102074369405)[&rate=2.894267651990464E-4]:1.4592026579234414)[&rate=2.986176207868239E-4]:2.9366871346396124,14[&rate=5.682688397865501E-4]:0.0)[&rate=5.306196527740606E-4]:4.775374458330347,17[&rate=3.497550293234282E-4]:10.875374458330342)[&rate=6.187492919284696E-4]:1.3062438464512667,(4[&rate=2.544948721298331E-4]:52.344053292218284,(((5[&rate=2.544948721298331E-4]:15.453306367671033,8[&rate=3.614922452697393E-4]:15.453306367671033)[&rate=6.960286814872394E-4]:9.270532360898137,((9[&rate=3.7395197348137274E-4]:5.182696284004676,10[&rate=1.321754766474163E-4]:5.182696284004676)[&rate=2.2049188300777997E-4]:7.309256231537004,12[&rate=1.0610433224888208E-4]:12.49195251554168)[&rate=2.986176207868239E-4]:12.23188621302749)[&rate=1.7337828000694414E-4]:18.77766116342834,((6[&rate=2.630353104966378E-4]:2.8598871220317816,11[&rate=4.3441475408569796E-4]:2.8598871220317816)[&rate=4.016255854820128E-4]:2.4607161866993277,7[&rate=2.1177439732560262E-4]:5.320603308731109)[&rate=2.2906389946605822E-4]:38.1808965832664)[&rate=5.004903603127278E-4]:8.842553400220773)[&rate=2.1177439732560262E-4]:25.837565012563324)[&rate=5.682688397865501E-4]:2.540819740951079,15[&rate=2.1177439732560262E-4]:14.722438045732687)[&rate=2.716773046416026E-4]:5.57756195426731,18[&rate=2.1177439732560262E-4]:0.0)[&rate=2.804608820781421E-4]:11.583258864894319,(2[&rate=3.497550293234282E-4]:17.599999999999994,13[&rate=3.614922452697393E-4]:0.0)[&rate=2.544948721298331E-4]:14.283258864894322)[&rate=2.2906389946605822E-4]:10.7627811991362,20[&rate=4.3441475408569796E-4]:108.64604006403052)[&rate=3.080793507544678E-4]:0.07678773828209273,19[&rate=1.4868368163964546E-4]:108.72282780231261)[&rate=1.0]:0.0;
tree STATE_3075000 = ((((((1[&rate=5.607293664568868E-4]:16.099999999999994,14[&rate=2.501743748095472E-4]:0.0)[&rate=1.7893038066634328E-4]:16.4549893327882,18[&rate=2.0915394679076047E-4]:2.254989332788199)[&rate=1.8703861582344524E-4]:2.8764682400407935,13[&rate=2.2976053490306392E-4]:7.831457572828995)[&rate=4.442797645981181E-4]:1.1722849983860044,(2[&rate=2.229644311474734E-4]:26.12769848119379,(((3[&rate=2.6413269010186697E-4]:4.9765902495200365,((4[&rate=2.0915394679076047E-4]:51.01089090777858,((5[&rate=3.196392168937146E-4]:12.508577055547052,12[&rate=4.225487366956568E-4]:12.508577055547052)[&rate=2.9407829602789927E-4]:35.53248119890827,(((6[&rate=4.7119024781431537E-4]:3.439336511540228,7[&rate=3.2906785466413916E-4]:3.439336511540228)[&rate=2.9407829602789927E-4]:15.333350342948362,8[&rate=3.2906785466413916E-4]:18.77268685448859)[&rate=3.3909806114782663E-4]:10.562294996157007,(9[&rate=6.770348837185453E-4]:1.3412647380055793,(10[&rate=2.6413269010186697E-4]:0.2008305785328096,11[&rate=2.570975394248866E-4]:0.2008305785328096)[&rate=2.0203964496659583E-4]:1.1404341594727696)[&rate=3.742176755435139E-4]:27.993717112640017)[&rate=3.0221642949880177E-4]:18.706076403809725)[&rate=1.8703861582344524E-4]:2.969832653323259)[&rate=2.9407829602789927E-4]:14.989109092221419,15[&rate=3.6148878597387434E-4]:0.0)[&rate=3.107150009853251E-4]:0.0765902495200379)[&rate=5.607293664568868E-4]:13.73696667272769,17[&rate=3.742176755435139E-4]:13.813556922247727)[&rate=2.1611064308539948E-4]:4.62766404071229,16[&rate=2.0203964496659583E-4]:18.441220962960017)[&rate=4.042309978299093E-4]:7.686477518233772)[&rate=2.3653795376484373E-4]:0.4760440900212046)[&rate=3.196392168937146E-4]:0.46583025037233483,20[&rate=5.607293664568868E-4]:93.06957282158733)[&rate=2.6413269010186697E-4]:4.304910594813705,19[&rate=2.4333169002872573E-4]:97.37448341640103)[&rate=1.0]:0.0;
tree STATE_3090000 = (((((((1[&rate=2.52120111228379E-4]:19.552568731534123,((3[&rate=1.2671527285821696E-4]:4.899999999999999,15[&rate=4.027673467350926E-4]:0.0)[&rate=2.792336483293104E-4]:7.891209763448856,16[&rate=2.792336483293104E-4]:7.891209763448856)[&rate=4.5241904444005696E-4]:1.661358968085267)[&rate=2.52120111228379E-4]:5.95921578192204,(14[&rate=2.3938998823645757E-4]:4.399535710253062,17[&rate=2.0367616913061912E-4]:10.499535710253056)[&rate=5.140896663935743E-4]:5.012248803203107)[&rate=5.515030005621192E-4]:7.747545299672936,18[&rate=1.2671527285821696E-4]:2.959329813129102)[&rate=0.001107619550200076]:5.7429784710592315,2[&rate=7.40634365103877E-5]:29.00230828418833)[&rate=9.144579995000358E-4]:9.930897897018184,((4[&rate=2.52120111228379E-4]:58.797438465365,(((5[&rate=4.027673467350926E-4]:14.477166335312724,12[&rate=9.144579995000358E-4]:14.477166335312724)[&rate=8.970790378427244E-5]:3.386294956701768,((6[&rate=4.027673467350926E-4]:4.033035955746065,7[&rate=4.814068547745913E-4]:4.033035955746065)[&rate=9.144579995000358E-4]:0.2321846710221367,(8[&rate=5.178860156782538E-5]:1.1980649268426538,11[&rate=1.5957159926864616E-4]:1.1980649268426538)[&rate=6.473892876803907E-4]:3.0671556999255483)[&rate=4.814068547745913E-4]:13.59824066524629)[&rate=1.0304204140085824E-4]:12.334720710863017,(9[&rate=4.027673467350926E-4]:2.818519754090781,10[&rate=5.140896663935743E-4]:2.818519754090781)[&rate=4.263875043651747E-4]:27.37966224878673)[&rate=4.027673467350926E-4]:28.59925646248749)[&rate=1.923933262445005E-4]:24.802561534634997,13[&rate=5.140896663935743E-4]:0.0)[&rate=3.4267978723019203E-4]:21.33320618120652)[&rate=1.7040494837224155E-4]:2.1008144840311047,20[&rate=5.140896663935743E-4]:107.03402066523762)[&rate=2.0367616913061912E-4]:12.650285710363377,19[&rate=8.970790378427244E-5]:119.684306375601)[&rate=1.0]:0.0;
tree STATE_3105000 = ((((((((1[&rate=6.827307003945644E-4]:24.969510890905028,15[&rate=3.8240014892940475E-4]:14.969510890905028)[&rate=0.001095711781477389]:5.808246084768214,(((4[&rate=2.6739408611821435E-4]:2.2397364731921523,5[&rate=7.509878325556253E-4]:2.2397364731921523)[&rate=5.922312184443235E-4]:8.347204823865878,11[&rate=3.0965032953656716E-4]:10.586941297058031)[&rate=1.042847516693466E-4]:55.03957799535809,((6[&rate=1.042847516693466E-4]:23.054926656971958,7[&rate=1.6736618254680844E-4]:23.054926656971958)[&rate=3.6901633918349553E-4]:17.19744564787768,((8[&rate=3.8240014892940475E-4]:19.50035293741245,12[&rate=1.042847516693466E-4]:19.50035293741245)[&rate=4.44410237830189E-4]:11.027962960994131,(9[&rate=1.9294158678885882E-4]:4.626468195666436,10[&rate=2.365321710905591E-4]:4.626468195666436)[&rate=3.2075483390948235E-4]:25.901847702740145)[&rate=5.304212484783222E-4]:9.724056406443054)[&rate=4.2733193052755196E-4]:25.374146987566483)[&rate=3.0965032953656716E-4]:21.151237683257122)[&rate=4.1142202690364483E-4]:2.517730500272151,(3[&rate=4.8308875070021223E-4]:25.199999999999996,18[&rate=4.1142202690364483E-4]:0.0)[&rate=4.6289329632479297E-4]:2.9954874759453958)[&rate=8.567640560141674E-4]:4.0712983992727345,(2[&rate=4.44410237830189E-4]:19.885455514172918,17[&rate=6.32290555999848E-4]:19.885455514172918)[&rate=1.042847516693466E-4]:7.4813303610452095)[&rate=2.4685177326994886E-4]:2.2621543107763955,(14[&rate=2.365321710905591E-4]:0.0,16[&rate=4.1142202690364483E-4]:6.099999999999994)[&rate=3.4398749240433906E-4]:23.52894018599453)[&rate=1.6736618254680844E-4]:8.402212110826667,13[&rate=4.8308875070021223E-4]:20.431152296821196)[&rate=5.589477137175469E-4]:0.4267071673800018,20[&rate=5.922312184443235E-4]:104.45785946420119)[&rate=1.3336931005735077E-4]:0.014658587448280969,19[&rate=1.6736618254680844E-4]:104.47251805164947)[&rate=1.0]:0.0;
tree STATE_3120000 = ((((((1[&rate=3.3299563519426556E-4]:18.60931360608197,17[&rate=2.321219792012179E-4]:8.609313606081969)[&rate=1.6231526720702846E-4]:11.690686393918028,18[&rate=4.076229683723945E-4]:0.0)[&rate=3.6620083479806E-4]:11.352505890458787,(((2[&rate=3.0458030704869516E-4]:17.599999999999994,13[&rate=1.499270547761142E-4]:0.0)[&rate=1.9175359052090666E-4]:0.5976480348692519,((4[&rate=2.321219792012179E-4]:56.28207268063724,((5[&rate=2.4752808026136066E-4]:4.247813475193078,12[&rate=2.165309013937172E-4]:4.247813475193078)[&rate=1.8273184659489079E-4]:41.21588285633012,(((6[&rate=3.4340856386358437E-4]:0.15697977261275914,8[&rate=1.0944292449583945E-4]:0.15697977261275914)[&rate=3.0458030704869516E-4]:4.528451365460931,7[&rate=1.8273184659489079E-4]:4.685431138073691)[&rate=3.3299563519426556E-4]:25.072199613844866,(9[&rate=2.165309013937172E-4]:4.914311553575795,(10[&rate=2.0853403550313924E-4]:1.612801829748645,11[&rate=2.0853403550313924E-4]:1.612801829748645)[&rate=2.4752808026136066E-4]:3.3015097238271496)[&rate=3.231036151149059E-4]:24.843319198342762)[&rate=2.3982568936459082E-4]:15.706065579604637)[&rate=1.6231526720702846E-4]:10.818376349114047)[&rate=1.7303387136867647E-4]:15.817927319362752,14[&rate=2.6308360099355137E-4]:0.0)[&rate=2.9582618086020513E-4]:12.097648034869252)[&rate=2.9582618086020513E-4]:1.5454908904723226,3[&rate=3.0458030704869516E-4]:24.643138925341567)[&rate=4.6518034016759406E-4]:11.909366965117215)[&rate=3.925687373549646E-4]:1.2591539116564974,(15[&rate=4.076229683723945E-4]:12.77576624146316,16[&rate=3.925687373549646E-4]:12.77576624146316)[&rate=2.790832519085809E-4]:20.13589356065212)[&rate=5.66964132560325E-4]:3.5268711043143384,20[&rate=5.66964132560325E-4]:102.43853090642962)[&rate=2.0853403550313924E-4]:2.920570342435454,19[&rate=1.6231526720702846E-4]:105.35910124886507)[&rate=1.0]:0.0;
tree STATE_3135000 = ((((((1[&rate=3.603287495931295E-4]:27.558945378159905,17[&rate=5.339409977367073E-4]:17.558945378159905)[&rate=3.680088759743751E-4]:3.2381463786404936,(((4[&rate=2.418727839325446E-4]:48.35656106192887,((5[&rate=4.830110547616028E-4]:5.992679751959909,12[&rate=1.9504797475324132E-4]:5.992679751959909)[&rate=4.4952802413676825E-4]:23.111940168753875,((6[&rate=3.8442534072040255E-4]:6.865801985471107,(7[&rate=3.252473225715366E-4]:1.7655486066184847,8[&rate=4.129018835566913E-4]:1.7655486066184847)[&rate=2.1061421577722996E-4]:5.1002533788526225)[&rate=5.051026410923576E-4]:16.22973322943821,((9[&rate=4.4952802413676825E-4]:0.05508081914883883,11[&rate=2.5016363490480367E-4]:0.05508081914883883)[&rate=3.529257186735065E-4]:1.6872326293114157,10[&rate=3.680088759743751E-4]:1.7423134484602545)[&rate=3.933042121629737E-4]:21.353221766449064)[&rate=5.765533564339634E-4]:6.009084705804465)[&rate=4.23912797461001E-4]:19.251941141215088)[&rate=2.328219269538921E-4]:23.743438938071122,14[&rate=3.529257186735065E-4]:0.0)[&rate=3.8442534072040255E-4]:14.200000000000003,18[&rate=3.933042121629737E-4]:0.0)[&rate=2.2263903484334756E-4]:0.4970917568004012)[&rate=3.387736503011541E-4]:1.5662276956212366,(2[&rate=3.680088759743751E-4]:21.84970031317893,(13[&rate=4.129018835566913E-4]:0.0,(15[&rate=3.055784027270546E-4]:9.246944166732703,16[&rate=2.723542056552236E-4]:9.246944166732703)[&rate=2.792162097963178E-4]:8.353055833267291)[&rate=3.8442534072040255E-4]:4.249700313178934)[&rate=2.579173017282484E-4]:0.5136191392427065)[&rate=2.328219269538921E-4]:0.5236798232892994,3[&rate=3.529257186735065E-4]:27.786999275710933)[&rate=3.529257186735065E-4]:0.9668207509777886,20[&rate=6.654125333073007E-4]:89.85382002668872)[&rate=1.9504797475324132E-4]:8.500464308022671,19[&rate=2.1061421577722996E-4]:98.3542843347114)[&rate=1.0]:0.0;
tree STATE_3150000 = ((((((((1[&rate=1.3980922653790786E-4]:9.750808919909417,(4[&rate=2.6615902091314174E-4]:50.04685955944667,(((5[&rate=4.3533610589544317E-4]:5.211832212087334,12[&rate=3.5485475420778383E-4]:5.211832212087334)[&rate=0.0013322432157217528]:5.530770009817292,(8[&rate=2.5451192971788624E-4]:2.098654665715264,(9[&rate=4.3533610589544317E-4]:1.6361224725136851,10[&rate=9.08234025254513E-5]:1.6361224725136851)[&rate=4.173471435018804E-4]:0.4625321932015789)[&rate=5.506247113587231E-4]:8.643947556189362)[&rate=3.8448626592077484E-4]:11.289495461380934,((6[&rate=3.8448626592077484E-4]:2.6741430173094316,7[&rate=2.4294097502646734E-4]:2.6741430173094316)[&rate=5.229468555149554E-4]:7.934499414599836,11[&rate=3.021572495095864E-4]:10.608642431909267)[&rate=1.9588141061545764E-4]:11.423455251376293)[&rate=2.6615902091314174E-4]:28.014761876161113)[&rate=4.980586820733571E-4]:15.703949360462744)[&rate=1.8336206013685644E-4]:0.24919108009058277,16[&rate=1.7015767820420413E-4]:0.0)[&rate=1.9588141061545764E-4]:6.321815045463367,15[&rate=1.9588141061545764E-4]:6.321815045463367)[&rate=3.6932475465442427E-4]:13.97818495453663,18[&rate=5.818490848686289E-4]:0.0)[&rate=2.4294097502646734E-4]:0.6557738059039195,17[&rate=6.598903925544273E-4]:20.955773805903917)[&rate=4.3533610589544317E-4]:1.3824604025704161,((2[&rate=0.001005987095085618]:17.599999999999994,13[&rate=5.229468555149554E-4]:0.0)[&rate=1.5587989722781582E-4]:4.03236704506007,(3[&rate=7.110984536242284E-4]:20.152959824173003,14[&rate=4.173471435018804E-4]:9.15295982417301)[&rate=2.3137888786834543E-4]:6.37940722088706)[&rate=8.654569146800274E-4]:0.7058671634142684)[&rate=1.9588141061545764E-4]:2.6940672577790394,20[&rate=6.177148789317031E-4]:91.03230146625337)[&rate=3.6932475465442427E-4]:4.283860490814305,19[&rate=1.7015767820420413E-4]:95.31616195706768)[&rate=1.0]:0.0;
tree STATE_3165000 = (((((((1[&rate=2.6514165782351705E-4]:15.014158620086604,((((4[&rate=2.2680063628814114E-4]:32.0021056005128,(5[&rate=2.0889749211048942E-4]:9.521942047055381,12[&rate=3.763067847371441E-4]:9.521942047055381)[&rate=2.7222635345411735E-4]:22.480163553457416)[&rate=1.6407121179311536E-4]:30.15483166845045,(((6[&rate=1.8449818052303942E-4]:6.274602900916592,7[&rate=1.780182193916819E-4]:6.274602900916592)[&rate=2.873722869160182E-4]:1.3621132502890623,8[&rate=2.4528654891872075E-4]:7.636716151205654)[&rate=2.7222635345411735E-4]:37.8371461454235,((9[&rate=1.6407121179311536E-4]:5.444066646750783,10[&rate=1.6407121179311536E-4]:5.444066646750783)[&rate=3.9498589224657105E-4]:12.734222924245046,11[&rate=3.763067847371441E-4]:18.17828957099583)[&rate=1.9689647095559368E-4]:27.295572725633328)[&rate=3.763067847371441E-4]:16.68307497233409)[&rate=1.9077030521616833E-4]:3.8430627310367527,15[&rate=1.248337116673174E-4]:0.0)[&rate=2.0292546143949776E-4]:0.45533066969017,16[&rate=2.0889749211048942E-4]:0.45533066969017)[&rate=2.3286084383952296E-4]:4.558827950396434)[&rate=3.6053628225333237E-4]:1.08584137991339,14[&rate=1.0405335731695088E-4]:0.0)[&rate=2.4528654891872075E-4]:18.56959203650716,3[&rate=2.873722869160182E-4]:29.569592036507153)[&rate=4.1807420119771945E-4]:2.957335028861266,17[&rate=1.7124798034726387E-4]:27.62692706536842)[&rate=2.4528654891872075E-4]:3.9599775728525373,((2[&rate=2.4528654891872075E-4]:17.599999999999994,13[&rate=3.2364109344917846E-4]:0.0)[&rate=1.6407121179311536E-4]:13.928873323865787,18[&rate=1.9077030521616833E-4]:11.228873323865784)[&rate=1.6407121179311536E-4]:0.05803131435517628)[&rate=2.2680063628814114E-4]:18.434026602237424,20[&rate=4.945868335817384E-4]:116.02093124045838)[&rate=2.796179147136238E-4]:6.162974414969554,19[&rate=1.0405335731695088E-4]:122.18390565542794)[&rate=1.0]:0.0;
[truncated: 18,378,304 more chars]
